# Supplementary material for: Integrative analyses of single-cell and bulk RNA sequencing to construct the tumor-associated macrophage-related prognostic signature in lung adenocarcinoma
Source: PeerJ journal article supplement (doi:10.7717/peerj.19920), 2025-09-01
Supplement: MIQE_checklist.xls [file MIQE_checklist.xls]

## Sheet: Sheet1
ITEM TO CHECK	IMPORTANCE	CHECKLIST
EXPERIMENTAL DESIGN
Definition of experimental and control groups	E	YES (page5-6)
Number within each group	E	12
Assay carried out by core lab or investigator's lab?	D	YES
Acknowledgement of authors' contributions	D	YES (page12)
SAMPLE
Description	E	(page5)
Volume/mass of sample processed	D	1 μg
Microdissection or macrodissection	E	No
Processing procedure	E
If frozen - how and how quickly?	E	No
If fixed - with what, how quickly?	E	No
Sample storage conditions and duration (especially for FFPE samples)	E	stored at－80℃
NUCLEIC ACID EXTRACTION
Procedure and/or instrumentation	E	(page5-6)
Name of kit and details of any modifications	E	YES
Source of additional reagents used	D	YES
Details of DNase or RNAse treatment	E
Contamination assessment (DNA or RNA)	E	YES
Nucleic acid quantification	E	YES
Instrument and method	E	YES
Purity (A260/A280)	D	NO
Yield	D	NO
RNA integrity method/instrument	E
RIN/RQI or Cq of 3' and 5' transcripts	E
Electrophoresis traces	D	NO
Inhibition testing (Cq dilutions, spike or other)	E	NO
REVERSE TRANSCRIPTION
Complete reaction conditions	E	(page6)
Amount of RNA and reaction volume	E	20 μl
Priming oligonucleotide (if using GSP) and concentration	E	1.0 μl
Reverse transcriptase and concentration	E	1.0 μl
Temperature and time	E	37℃,60min；98℃,10min
Manufacturer of reagents and catalogue numbers	D	NO
Cqs with and without RT	D*	NO
Storage conditions of cDNA	D	stored at－80℃
qPCR TARGET INFORMATION
If multiplex, efficiency and LOD of each assay.	E	NO
Sequence accession number	E	NO
Location of amplicon	D	NO
Amplicon length	E	YES
In silico specificity screen (BLAST, etc)	E	YES
Pseudogenes, retropseudogenes or other homologs?	D	NO
Sequence alignment	D	NO
Secondary structure analysis of amplicon	D	NO
Location of each primer by exon or intron (if applicable)	E	NO
What splice variants are targeted?	E	NO
qPCR OLIGONUCLEOTIDES
Primer sequences	E	YES (page6)
RTPrimerDB Identification Number	D	NO
Probe sequences	D**	YES
Location and identity of any modifications	E	YES
Manufacturer of oligonucleotides	D	YES
Purification method	D	YES
qPCR PROTOCOL
Complete reaction conditions	E	20 μl
Reaction volume and amount of cDNA/DNA	E	1.0 μl
Primer, (probe), Mg++ and dNTP concentrations	E	0.5 μl
Polymerase identity and concentration	E	0.5 μl
Buffer/kit identity and manufacturer	E	YES
Exact chemical constitution of the buffer	D	NO
Additives (SYBR Green I, DMSO, etc.)	E	10 μl
Manufacturer of plates/tubes and catalog number	D	NO
Complete thermocycling parameters	E	YES
Reaction setup (manual/robotic)	D	94℃ 2min，94℃ 20s，58℃ 20 s，72℃ 20s，40 cycles
Manufacturer of qPCR instrument	E	YES
qPCR VALIDATION
Evidence of optimisation (from gradients)	D	NO
Specificity (gel, sequence, melt, or digest)	E	NO
For SYBR Green I, Cq of the NTC	E	NO
Standard curves with slope and y-intercept	E	NO
PCR efficiency calculated from slope	E	NO
Confidence interval for PCR efficiency or standard error	D	NO
r2 of standard curve	E	NO
Linear dynamic range	E	NO
Cq variation at lower limit	E	NO
Confidence intervals throughout range	D	NO
Evidence for limit of detection	E	NO
If multiplex, efficiency and LOD of each assay.	E	NO
DATA ANALYSIS
qPCR analysis program (source, version)	E	YES (page7)
Cq method determination	E	YES
Outlier identification and disposition	E	YES
Results of NTCs	E	YES
Justification of number and choice of reference genes	E	YES
Description of normalisation method	E	YES
Number and concordance of biological replicates	D	YES
Number and stage (RT or qPCR) of technical replicates	E	YES
Repeatability (intra-assay variation)	E	YES
Reproducibility (inter-assay variation, %CV)	D	YES
Power analysis	D	YES
Statistical methods for result significance	E	YES
Software (source, version)	E	YES
Cq or raw data submission using RDML	D	YES
Table 1. MIQE checklist for authors, reviewers and editors. All essential information (E) must be submitted with the manuscript. Desirable
information (D) should be submitted if available. If using primers obtained from RTPrimerDB, information on qPCR target, oligonucleotides,
protocols and validation is available from that source.
*: Assessing the absence of DNA using a no RT assay is essential when first extracting RNA. Once the sample has been validated as
RDNA-free, inclusion of a no-RT control is desirable, but no longer essential.
**: Disclosure of the probe sequence is highly desirable and strongly encouraged. However, since not all commercial pre-designed assay
vendors provide this information, it cannot be an essential requirement. Use of such assays is advised against.
