# Supplementary material for: Integrative analyses of single-cell and bulk RNA sequencing to construct the tumor-associated macrophage-related prognostic signature in lung adenocarcinoma
Source: PeerJ journal article supplement (doi:10.7717/peerj.19920), 2025-09-01
Supplement: qPCR.xlsx [file qPCR.xlsx]

## Sheet: pdgfb
		GAPDH		PDGFB
		Ct (dR)		Ct (dR)	△Ct		△△Ct	expression quantity	Mean value	error value
2023001	PC1	14.21		26.71	12.6233		0.0233333	0.983957
		14.1		26.51	12.4233		-0.176667	1.13027
		13.95	14.0867	26.84	12.7533	12.6	0.153333	0.899171	1.00447	0.116907
2023002	PC2	14.46		27.76	13.2267		0.626667	0.647671
		14.55		27.98	13.4467		0.846667	0.556068
		14.59	14.5333	27.95	13.4167		0.816667	0.567752	0.590497	0.0498576
2023003	PC3	15.31		27.49	12.26		-0.34	1.26576
		15.26		27.42	12.19		-0.41	1.32869					PC	LUAD
		15.12	15.23	27.53	12.3		-0.3	1.23114	1.2752	0.049451			1.00447	0.354782
2023004	PC4	14.26		27.51	13.0867		0.486667	0.713672					0.590497	0.169652
		14.46		27.62	13.1967		0.596667	0.66128					1.2752	0.425396
		14.55	14.4233	27.22	12.7967		0.196667	0.872564	0.749172	0.110025			0.749172	0.212202
2023005	PC5	15.28		27.1	11.7767		-0.823333	1.76949					1.62393	0.653081
		15.28		27.29	11.9667		-0.633333	1.55114					0.278837	0.297383
		15.41	15.3233	27.29	11.9667		-0.633333	1.55114	1.62393	0.126061			0.335539	0.612088
2023006	PC6	14.49		28.9	14.4933		1.89333	0.269184					1.30104	1.00607
		14.42		28.66	14.2533		1.65333	0.317905					0.997484	0.886968
		14.31	14.4067	29.01	14.6033		2.00333	0.249423	0.278837	0.0352466			1.86938	0.69028
2023007	PC7	14.19		28.41	14.0933		1.49333	0.355191					1.12068	0.412246
		14.54		28.54	14.2233		1.62333	0.324585					0.848195	0.536426
		14.22	14.3167	28.53	14.2133		1.61333	0.326842	0.335539	0.0170562			0.954617	0.379994
2023008	PC8	14.42		26.51	12.2033		-0.396667	1.31646					1.1238	0.315901
		14.31		26.71	12.4033		-0.196667	1.14605					0.509795	0.346057
		14.19	14.3067	26.38	12.0733		-0.526667	1.4406	1.30104	0.14788			0.844564	0.463586
2023009	PC9	14.1		26.71	12.54		-0.06	1.04247					1.41101	0.656634
		13.95		26.71	12.54		-0.06	1.04247					0.90724	0.5474
		14.46	14.17	26.91	12.74		0.14	0.907519	0.997484	0.0779115			0.697045	0.336263
2023010	PC10	14.59		26.58	11.49		-1.11	2.15846					0.36852	0.164891
		15.26		26.84	11.75		-0.85	1.8025					0.527915	0.267119
		15.42	15.09	26.97	11.88		-0.72	1.64718	1.86938	0.262116			0.773987	0.186791
20230011	PC11	14.26		27.4	12.3467		-0.253333	1.19196					0.465618	0.345669
		15.59		27.71	12.6567		0.0566667	0.961483					0.614007	0.405088
		15.31	15.0533	27.38	12.3267		-0.273333	1.2086	1.12068	0.138119			0.586773	0.624087
20230012	PC12	15.26		27.22	12.5567		-0.0433333	1.03049					0.990487	0.317902
		14.42		27.42	12.7567		0.156667	0.897095					0.458939	0.32149
		14.31	14.6633	27.96	13.2967		0.696667	0.616996	0.848195	0.211041			0.276382	0.274307
20230013	PC13	14.23		27.29	12.65		0.05	0.965936
		14.58		27.49	12.85		0.25	0.840896
		15.11	14.64	27.16	12.52		-0.08	1.05702	0.954617	0.108505
20230014	PC14	14.59		27.37	12.4567		-0.143333	1.10445
		15.26		27.04	12.1267		-0.473333	1.38831
		14.89	14.9133	27.7	12.7867		0.186667	0.878633	1.1238	0.25539
20230015	PC15	14.1		27.98	13.8033		1.20333	0.434271
		14.55		27.49	13.3133		0.713333	0.609909
		13.88	14.1767	27.82	13.6433		1.04333	0.485205	0.509795	0.0903644
20230016	PC16	14.97		27.69	13.02		0.42	0.747425
		13.78		27.36	12.69		0.09	0.939523
		15.26	14.67	27.51	12.84		0.24	0.846745	0.844564	0.0960676
20230017	PC17	15.71		27.82	12.4833		-0.116667	1.08423
		15.04		27.49	12.1533		-0.446667	1.36289
		15.26	15.3367	27.1	11.7633		-0.836667	1.78592	1.41101	0.353313
20230018	PC18	14.94		27.3	12.6833		0.0833333	0.943874
		14.23		27.29	12.6733		0.0733333	0.950439
		14.68	14.6167	27.49	12.8733		0.273333	0.827406	0.90724	0.0692163
20230019	PC19	14.01		27.16	12.8067		0.206667	0.866537
		15.1		27.09	12.7367		0.136667	0.909618
		13.95	14.3533	28.62	14.2667		1.66667	0.31498	0.697045	0.331578
20230020	PC20	14.4		28.18	13.8633		1.26333	0.41658
		13.73		28.15	13.8333		1.23333	0.425334
		14.82	14.3167	28.84	14.5233		1.92333	0.263645	0.36852	0.0909297
20230021	PC21	13.63		28.81	13.8367		1.23667	0.424352
		15.42		28.35	13.3767		0.776667	0.583714
		15.87	14.9733	28.37	13.3967		0.796667	0.575678	0.527915	0.0897778
20230022	PC22	15.2		28.39	13.0533		0.453333	0.730353
		15.71		28.48	13.1433		0.543333	0.686184
		15.1	15.3367	28.08	12.7433		0.143333	0.905425	0.773987	0.115951
20230023	PC23	14.58		28.15	13.4933		0.893333	0.538369
		15.03		28.9	14.2433		1.64333	0.320116
		14.36	14.6567	28.15	13.4933		0.893333	0.538369	0.465618	0.126008
20230024	PC24	15.45		28.66	13.2867		0.686667	0.621288
		15.11		28.86	13.4867		0.886667	0.540862
		15.56	15.3733	28.53	13.1567		0.556667	0.679871	0.614007	0.0697898
20230025	PC25	14.89		28.77	13.55		0.95	0.517632
		15.98		28.41	13.19		0.59	0.664343
		14.79	15.22	28.61	13.39		0.79	0.578344	0.586773	0.0737175
20230026	PC26	14.34		28.28	13.9873		1.38733	0.382271
		14.34		28.88	14.5873		1.98733	0.252205
		14.198	14.2927	28.54	14.2473		1.64733	0.31923	0.317902	0.0650432
20230027	PC27	15.46		28.74	13.91		1.31	0.403321
		14.27		28.41	13.58		0.98	0.50698
		14.76	14.83	28.53	13.7		1.1	0.466516	0.458939	0.0522432
20230028	PC28	14.09		28.73	14.47		1.87	0.273573
		14.68		28.4	14.14		1.54	0.343885
		14.01	14.26	29.1	14.84		2.24	0.211686	0.276382	0.0661443
2023001	LUAD 1	14.33		28.4	14.14		1.54	0.343885
		14.33		28.29	14.03		1.43	0.371131
		14.188	14.2827	28.4	14.1173		1.51733	0.349331	0.354782	0.0144176
2023002	LUAD 2	14.78		29.71	15.4273		2.82733	0.140892
		15.15		29.64	15.3573		2.75733	0.147897
		14.43	14.7867	29.57	14.7833		2.18333	0.220166	0.169652	0.0438867
2023003	LUAD 3	14.43		28.65	13.8633		1.26333	0.41658
		14.288		28.43	13.6433		1.04333	0.485205
		14.88	14.5327	28.55	14.0173		1.41733	0.374404	0.425396	0.0559243
2023004	LUAD 4	15.25		29.23	14.6973		2.09733	0.23369
		13.92		29.28	14.7473		2.14733	0.225729
		13.92	14.3633	29.46	15.0967		2.49667	0.177186	0.212202	0.0305848
2023005	LUAD 5	13.778		27.5	13.1367		0.536667	0.689362
		14.37		27.61	13.2467		0.646667	0.638754
		14.74	14.296	27.56	13.264		0.664	0.631126	0.653081	0.031651
2023006	LUAD 6	15.51		29.11	14.814		2.214	0.215536
		15.51		28.97	14.674		2.074	0.2375
		15.368	15.4627	29.25	13.7873		1.18733	0.439114	0.297383	0.123233
2023007	LUAD 7	15.96		28.83	13.3673		0.767333	0.587502
		16.33		28.93	13.4673		0.867333	0.548159
		15.67	15.9867	29.1	13.1133		0.513333	0.700602	0.612088	0.0791393
2023008	LUAD 8	15.67		28.4	12.4133		-0.186667	1.13813
		15.528		28.62	12.6333		0.0333333	0.97716
		16.12	15.7727	28.52	12.7473		0.147333	0.902918	1.00607	0.120242
2023009	LUAD 9	16.49		28.2	12.4273		-0.172667	1.12714
		14.81		28.71	12.9373		0.337333	0.791503
		14.81	15.37	28.4	13.03		0.43	0.742262	0.886968	0.209447
2023010	LUAD 10	14.668		28.62	13.25		0.65	0.63728
		15.26		28.52	13.15		0.55	0.68302
		15.63	15.186	28.2	13.014		0.414	0.75054	0.69028	0.0569776
20230011	LUAD 11	14.53		28.71	13.524		0.924	0.527046
		14.53		29.64	14.454		1.854	0.276624
		14.388	14.4827	28.29	13.8073		1.20733	0.433068	0.412246	0.126503
20230012	LUAD 12	14.98		28.51	14.0273		1.42733	0.371818
		15.35		28.41	13.9273		1.32733	0.398504
		15.38	15.2367	28.09	12.8533		0.253333	0.838956	0.536426	0.262338
20230013	LUAD 13	15.38		28.6	13.3633		0.763333	0.589134
		15.238		29.71	14.4733		1.87333	0.272942
		15.83	15.4827	29.93	14.4473		1.84733	0.277906	0.379994	0.181137
20230014	LUAD 14	16.2		29.83	14.3473		1.74733	0.297852
		15.26		29.51	14.0273		1.42733	0.371818
		15.26	15.5733	30.02	14.4467		1.84667	0.278034	0.315901	0.0494284
20230015	LUAD 15	15.118		29.57	13.9967		1.39667	0.379806
		15.71		29.86	14.2867		1.68667	0.310644
		16.08	15.636	29.76	14.124		1.524	0.34772	0.346057	0.0346109
20230016	LUAD 16	15.48		29.44	13.804		1.204	0.43407
		15.48		29.95	14.314		1.714	0.304814
		15.338	15.4327	28.65	13.2173		0.617333	0.651875	0.463586	0.175403
20230017	LUAD 17	15.93		28.87	13.4373		0.837333	0.559677
		16.3		28.77	13.3373		0.737333	0.599847
		14.41	15.5467	28.45	12.9033		0.303333	0.810378	0.656634	0.134652
20230018	LUAD 18	14.41		28.96	13.4133		0.813333	0.569066
		14.268		28.55	13.0033		0.403333	0.756109
		14.86	14.5127	28.77	14.2573		1.65733	0.317025	0.5474	0.220343
20230019	LUAD 19	15.23		28.67	14.1573		1.55733	0.339779
		13.73		28.35	13.8373		1.23733	0.424156
		13.73	14.23	28.86	14.63		2.03	0.244855	0.336263	0.0897021
20230020	LUAD 20	13.588		29.28	15.05		2.45	0.183011
		14.18		29.5	15.27		2.67	0.157127
		14.55	14.106	29.4	15.294		2.694	0.154534	0.164891	0.0157459
20230021	LUAD 21	13.75		28.65	14.544		1.944	0.259895
		13.75		28.55	14.444		1.844	0.278548
		13.608	13.7027	28.23	14.5273		1.92733	0.262915	0.267119	0.0100124
20230022	LUAD 22	14.2		28.74	15.0373		2.43733	0.184625
		14.57		29.23	15.5273		2.92733	0.131457
		15.68	14.8167	29.45	14.6333		2.03333	0.24429	0.186791	0.0564475
20230023	LUAD 23	15.68		29.35	14.5333		1.93333	0.261824
		15.538		29.03	14.2133		1.61333	0.326842
		16.13	15.7827	29.54	13.7573		1.15733	0.44834	0.345669	0.094673
20230024	LUAD 24	16.5		29.46	13.6773		1.07733	0.473904
		14.85		29.68	13.8973		1.29733	0.406878
		14.85	15.4	29.58	14.18		1.58	0.334482	0.405088	0.0697283
20230025	LUAD 25	14.708		29.26	13.86		1.26	0.417544
		15.3		29.77	14.37		1.77	0.293209
		15.67	15.226	27.61	12.384		-0.216	1.16151	0.624087	0.469554
20230026	LUAD 26	14.59		27.83	12.604		0.004	0.997231
		15.04		27.73	12.504		-0.096	1.06881
		14.37	14.6667	27.41	12.7433		0.143333	0.905425	0.990487	0.0818991
20230027	LUAD 27	14.79		27.92	13.2533		0.653333	0.63581
		15.16		29.11	14.4433		1.84333	0.278677
		14.39	14.78	29.33	14.55		1.95	0.258816	0.391101	0.212156
20230028	LUAD 28	14.39		29.23	14.45		1.85	0.277392
		14.248		28.91	14.13		1.53	0.346277
		14.84	14.4927	29.42	14.9273		2.32733	0.199252	0.274307	0.0735612

## Sheet: KLF4
		GAPDH		KLF4
		Ct (dR)		Ct (dR)	△Ct		△△Ct	expression quantity	Mean value	error value
2023001	PC1	15.35		28.68	13.2407		-0.0433333	1.03049
		15.428		28.7	13.2607		-0.0233333	1.0163				PC	LUAD
		15.54	15.4393	28.79	13.3507	13.284	0.0666667	0.954842	1.00055	0.0402119		1.00055	0.377045
2023002	PC2	15.548		28.39	13.0307		-0.253333	1.19196				1.22594	0.392456
		15.16		28.46	13.1007		-0.183333	1.1355				0.646764	0.303272
		15.37	15.3593	28.21	12.8507		-0.433333	1.35035	1.22594	0.11138		1.27472	0.273786
2023003	PC3	15.34		28.46	13.48		0.196	0.872968				0.973283	0.522708
		14.84		298.97	283.99		270.706	3.23128e-82				0.980606	0.632901
		14.76	14.98	28.17	13.19		-0.094	1.06733	0.646764	0.568482		0.810562	0.660234
2023004	PC4	15.52		28.84	13.2673		-0.0166667	1.01162				0.883963	0.380395
		15.56		28.08	12.5073		-0.776667	1.71317				0.503453	0.516347
		15.638	15.5727	28.72	13.1473		-0.136667	1.09936	1.27472	0.382236		0.903633	0.532508
2023005	PC5	15.75		28.92	13.364		0.08	0.946058				1.07846	0.43102
		15.758		28.59	13.034		-0.25	1.18921				1.37872	0.492561
		15.16	15.556	29.19	13.634		0.35	0.784584	0.973283	0.203681		0.785792	0.566487
2023006	PC6	15.37		28.85	13.6667		0.382667	0.767019				0.685826	0.470284
		15.34		28.05	12.8667		-0.417333	1.33546				0.862262	0.40525
		14.84	15.1833	28.72	13.5367		0.252667	0.839344	0.980606	0.30943		0.797455	0.523956
2023007	PC7	14.76		28.84	13.57		0.286	0.820173				0.626717	0.479206
		15.52		29.04	13.77		0.486	0.714002				0.983599	0.443965
		15.53	15.27	28.71	13.44		0.156	0.89751	0.810562	0.0921308		0.833024	0.339038
2023008	PC8	15.03		28.41	13.18		-0.104	1.07475				1.01773	0.423596
		14.95		28.71	13.48		0.196	0.872968				1.07422	0.478927
		15.71	15.23	29.02	13.79		0.506	0.704172	0.883963	0.185533		0.72716	0.562016
2023009	PC9	15.608		29.95	14.702		1.418	0.374231				0.521786	0.508306
		15.108		29.88	14.632		1.348	0.392836				0.478572	0.456767
		15.028	15.248	28.96	13.712		0.428	0.743291	0.503453	0.207915		0.354016	0.460857
2023010	PC10	15.788		28.74	13.164		-0.12	1.08673				0.79893	0.321552
		15.72		28.86	13.284		0	1				0.671122	0.529248
		15.22	15.576	29.54	13.964		0.68	0.624165	0.903633	0.245881		0.812217	0.434997
20230011	PC11	15.14		29.59	14.0007		0.716667	0.608502
		15.9		29.77	14.1807		0.896667	0.537126
		15.728	15.5893	27.81	12.2207		-1.06333	2.08975	1.07846	0.876533
20230012	PC12	15.228		27.92	12.492		-0.792	1.73147
		15.148		27.87	12.442		-0.842	1.79253
		15.908	15.428	29.42	13.992		0.708	0.612168	1.37872	0.664559
20230013	PC13	15.59		29.28	14.0567		0.772667	0.585335
		15.11		29.56	14.3367		1.05267	0.482076
		14.97	15.2233	28.14	12.9167		-0.367333	1.28997	0.785792	0.439669
20230014	PC14	15.06		28.24	13.5467		0.262667	0.833546
		14.58		28.58	13.8867		0.602667	0.658536
		14.44	14.6933	28.8	14.1067		0.822667	0.565396	0.685826	0.136142
20230015	PC15	15.51		28.7	13.5567		0.272667	0.827788
		15.03		28.38	13.2367		-0.0473333	1.03335
		14.89	15.1433	28.89	13.7467		0.462667	0.725644	0.862262	0.156725
20230016	PC16	15.26		28.58	13.5		0.216	0.860949
		15.23		28.8	13.72		0.436	0.739181
		14.75	15.08	28.7	13.62		0.336	0.792235	0.797455	0.0610516
20230017	PC17	14.61		28.38	13.4233		0.139333	0.907939
		15.2		28.89	13.9333		0.649333	0.637575
		15.06	14.9567	29.82	14.8633		1.57933	0.334636	0.626717	0.286805
20230018	PC18	15.57		28.47	13.1973		-0.0866667	1.06191
		15.43		28.69	13.4173		0.133333	0.911722
		14.818	15.2727	28.59	13.3173		0.0333333	0.97716	0.983599	0.0753024
20230019	PC19	14.84		28.27	13.35		0.066	0.955283
		14.96		28.78	13.86		0.576	0.670821
		14.96	14.92	28.4	13.48		0.196	0.872968	0.833024	0.146377
20230020	PC20	15.06		28.62	13.4433		0.159333	0.895439
		15.21		28.52	13.3433		0.0593333	0.959707
		15.26	15.1767	28.2	13.0233		-0.260667	1.19803	1.01773	0.159422
20230021	PC21	15.33		28.71	13.32		0.036	0.975355
		15.41		28.4	13.01		-0.274	1.20916
		15.43	15.39	28.62	13.23		-0.054	1.03814	1.07422	0.121003
20230022	PC22	15.63		28.52	13.5533		0.269333	0.829703
		14.78		28.71	13.7433		0.459333	0.727322
		14.49	14.9667	28.93	13.9633		0.679333	0.624454	0.72716	0.102625
20230023	PC23	14.51		28.83	14.2813		0.997333	0.500925
		14.558		28.51	13.9613		0.677333	0.62532
		14.578	14.5487	29.02	14.4713		1.18733	0.439114	0.521786	0.0948398
20230024	PC24	14.68		28.71	14.2367		0.952667	0.516677
		14.7		28.93	14.4567		1.17267	0.443601
		14.04	14.4733	28.83	14.3567		1.07267	0.475439	0.478572	0.0366386
20230025	PC25	14.06		28.51	14.2473		0.963333	0.512871
		14.72		29.02	14.7573		1.47333	0.360149
		14.008	14.2627	29.95	15.6873		2.40333	0.189027	0.354016	0.162009
20230026	PC26	14.028		27.6	13.4973		0.213333	0.862542
		14.13		27.82	13.7173		0.433333	0.740549
		14.15	14.1027	27.72	13.6173		0.333333	0.793701	0.79893	0.0611646
20230027	PC27	14.86		28.4	13.52		0.236	0.849096
		14.88		28.91	14.03		0.746	0.596254
		14.9	14.88	28.98	14.1		0.816	0.568015	0.671122	0.154776
20230028	PC28	15.07		28.66	13.57		0.286	0.820173
		15.09		28.85	13.76		0.476	0.718968
		15.11	15.09	28.53	13.44		0.156	0.89751	0.812217	0.0895364
2023001	LUAD 1	15.35		30.02	14.5807		1.29667	0.407066
		15.428		30.24	14.8007		1.51667	0.349492
		15.54	15.4393	30.14	14.7007		1.41667	0.374577	0.377045	0.0288658
2023002	LUAD 2	15.548		29.82	14.4607		1.17667	0.442372
		15.16		30.33	14.9707		1.68667	0.310644
		15.37	15.3593	29.88	14.5207		1.23667	0.424352	0.392456	0.0714221
2023003	LUAD 3	15.34		30.17	15.19		1.906	0.266831
		14.84		30.07	15.09		1.806	0.285983
		14.76	14.98	29.75	14.77		1.486	0.357001	0.303272	0.047506
2023004	LUAD 4	14.52		30.26	15.6873		2.40333	0.189027
		14.56		29.96	15.3873		2.10333	0.23272
		14.638	14.5727	29.18	14.6073		1.32333	0.399611	0.273786	0.111136
2023005	LUAD 5	15.05		29.08	13.9573		0.673333	0.627056
		15.158		29.76	14.6373		1.35333	0.391387
		15.16	15.1227	29.27	14.1473		0.863333	0.549681	0.522708	0.120128
2023006	LUAD 6	15.37		29.86	14.3433		1.05933	0.479854
		15.34		29.08	13.5633		0.279333	0.823972
		15.84	15.5167	29.55	14.0333		0.749333	0.594878	0.632901	0.175182
2023007	LUAD 7	14.76		28.57	13.9667		0.682667	0.623013
		14.52		28.66	14.0567		0.772667	0.585335
		14.53	14.6033	28.26	13.6567		0.372667	0.772354	0.660234	0.0989094
2023008	LUAD 8	14.03		29.33	14.7667		1.48267	0.357827
		14.95		29.08	14.5167		1.23267	0.42553
		14.71	14.5633	29.33	14.7667		1.48267	0.357827	0.380395	0.0390886
2023009	LUAD 9	15.608		29.84	14.592		1.308	0.40388
		15.108		29.04	13.792		0.508	0.703197
		15.028	15.248	29.71	14.462		1.178	0.441964	0.516347	0.162933
2023010	LUAD 10	15.788		29.95	14.374		1.09	0.469761
		15.72		29.59	14.014		0.73	0.602904
		15.22	15.576	29.79	14.214		0.93	0.524858	0.532508	0.0669001
20230011	LUAD 11	15.04		29.46	14.5707		1.28667	0.409897
		14.9		29.06	14.1707		0.886667	0.540862
		14.728	14.8893	29.72	14.8307		1.54667	0.3423	0.43102	0.100952
20230012	LUAD 12	15.228		29.92	14.492		1.208	0.432868
		15.148		29.59	14.162		0.878	0.544121
		15.908	15.428	29.71	14.282		0.998	0.500694	0.492561	0.0560706
20230013	LUAD 13	15.19		28.91	13.7833		0.499333	0.707434
		15.05		29.58	14.4533		1.16933	0.444627
		15.14	15.1267	29.28	14.1533		0.869333	0.5474	0.566487	0.132439
20230014	LUAD 14	14.66		28.58	13.6567		0.372667	0.772354
		14.52		29.89	14.9667		1.68267	0.311506
		15.59	14.9233	29.82	14.8967		1.61267	0.326993	0.470284	0.261714
20230015	LUAD 15	15.11		29.75	14.61		1.326	0.398873
		14.97		29.83	14.69		1.406	0.377356
		15.34	15.14	29.61	14.47		1.186	0.43952	0.40525	0.0315685
20230016	LUAD 16	15.31		28.73	13.7867		0.502667	0.705801
		14.83		29.41	14.4667		1.18267	0.440536
		14.69	14.9433	29.46	14.5167		1.23267	0.42553	0.523956	0.157661
20230017	LUAD 17	15.28		29.64	14.2833		0.999333	0.500231
		15.14		29.68	14.3233		1.03933	0.486552
		15.65	15.3567	29.79	14.4333		1.14933	0.450834	0.479206	0.0255051
20230018	LUAD 18	15.51		29.74	14.8233		1.53933	0.344044
		14.69		29.29	14.3733		1.08933	0.469979
		14.55	14.9167	29.15	14.2333		0.949333	0.517872	0.443965	0.0897859
20230019	LUAD 19	14.028		29.43	15.102		1.818	0.283614
		14.548		29.01	14.682		1.398	0.379455
		14.408	14.328	29.11	14.782		1.498	0.354044	0.339038	0.0496514
20230020	LUAD 20	14.99		29.28	14.4233		1.13933	0.453969
		14.51		29.2	14.3433		1.05933	0.479854
		15.07	14.8567	29.71	14.8533		1.56933	0.336964	0.423596	0.0761333
20230021	LUAD 21	15.46		29.41	14.3167		1.03267	0.488806
		14.98		29.64	14.5467		1.26267	0.416773
		14.84	15.0933	29.29	14.1967		0.912667	0.531202	0.478927	0.0578508
20230022	LUAD 22	13.91		28.51	14.3		1.016	0.494485
		14.43		28.41	14.2		0.916	0.529976
		14.29	14.21	28.09	13.88		0.596	0.661586	0.562016	0.088037
20230023	LUAD 23	15.66		29.6	14.12		0.836	0.560195
		15.63		29.71	14.23		0.946	0.51907
		15.15	15.48	29.93	14.45		1.166	0.445655	0.508306	0.0580233
20230024	LUAD 24	15.01		29.83	14.4733		1.18933	0.438505
		15.6		29.51	14.1533		0.869333	0.5474
		15.46	15.3567	30.02	14.6633		1.37933	0.384396	0.456767	0.0830219
20230025	LUAD 25	15.97		29.57	14.2467		0.962667	0.513108
		15.83		29.86	14.5367		1.25267	0.419672
		14.17	15.3233	29.76	14.4367		1.15267	0.449793	0.460857	0.0476905
20230026	LUAD 26	14.248		29.44	15.1147		1.83067	0.281135
		14.36		29.95	15.6247		2.34067	0.197419
		14.368	14.3253	28.65	14.3247		1.04067	0.486103	0.321552	0.148525
20230027	LUAD 27	14.25		28.87	14.3867		1.10267	0.465655
		14.27		28.77	14.2867		1.00267	0.499077
		14.93	14.4833	28.45	13.9667		0.682667	0.623013	0.529248	0.0829041
20230028	LUAD 28	14.218		28.96	14.6947		1.41067	0.376138
		14.238		28.55	14.2847		1.00067	0.499769
		14.34	14.2653	28.77	14.5047		1.22067	0.429084	0.434997	0.0620273

## Sheet: CD74
		GAPDH		CD74
		Ct (dR)		Ct (dR)	△Ct		△△Ct	expression quantity	Mean value	error value
2023001	PC1	14.136		28.37	14.2227		-0.0433333	1.03049				1.00055	2.19338
		14.15		28.39	14.2427		-0.0233333	1.0163				1.10084	1.22364
		14.156	14.1473	28.48	14.3327	14.266	0.0666667	0.954842	1.00055	0.0402119		1.05055	1.22815
2023002	PC2	14.17		28.08	13.8753		-0.390667	1.311				1.08396	1.44608
		14.17		28.15	13.9453		-0.320667	1.24891				1.14467	2.18769
		14.274	14.2047	28.9	14.6953		0.429333	0.742605	1.10084	0.311788		1.24631	2.1517
2023003	PC3	14.31		28.15	13.82		-0.446	1.36226				1.33699	1.57905
		14.33		28.66	14.33		0.064	0.956608				1.24442	0.958191
		14.35	14.33	28.86	14.53		0.264	0.832776	1.05055	0.276959		1.40021	0.657165
2023004	PC4	14.406		28.53	14.1173		-0.148667	1.10854				1.5291	1.38019
		14.416		28.77	14.3573		0.0913333	0.938655				3.44052	1.07834
		14.416	14.4127	28.41	13.9973		-0.268667	1.20469	1.08396	0.134712		4.24108	0.845962
2023005	PC5	14.426		28.61	14.112		-0.154	1.11265				3.58923	0.768801
		14.468		28.28	13.782		-0.484	1.39862				3.33637	0.992427
		14.6	14.498	28.88	14.382		0.116	0.922742	1.14467	0.239547		3.27575	0.683745
2023006	PC6	14.606		28.54	13.9313		-0.334667	1.26109				3.07035	0.628804
		14.61		28.74	14.1313		-0.134667	1.09784				3.16603	1.97102
		14.61	14.6087	28.41	13.8013		-0.464667	1.38	1.24631	0.141659		3.31576	2.58732
2023007	PC7	14.62		28.53	13.83		-0.436	1.35285				3.25546	2.45927
		14.684		28.73	14.03		-0.236	1.17772				3.3785	2.33284
		14.796	14.7	28.4	13.7		-0.566	1.48041	1.33699	0.151967		3.34472	2.476
2023008	PC8	14.8		28.65	13.84		-0.426	1.3435				2.79916	1.86174
		14.804		28.87	14.06		-0.206	1.15349				3.06144	2.6549
		14.826	14.81	28.77	13.96		-0.306	1.23628	1.24442	0.0952705		3.35579	1.96789
2023009	PC9	14.826		28.45	13.5933		-0.672667	1.59402				3.44788	2.4171
		14.866		28.96	14.1033		-0.162667	1.11935				3.28085	2.32967
		14.878	14.8567	28.55	13.6933		-0.572667	1.48727	1.40021	0.249018		2.91481	2.16825
2023010	PC10	14.904		28.77	13.838		-0.428	1.34537				3.55533	0.988647
		14.946		28.67	13.738		-0.528	1.44193
		14.946	14.932	28.35	13.418		-0.848	1.8	1.5291	0.239526
20230011	PC11	14.99		28.86	13.8573		-0.408667	1.32746
		14.998		27.07	12.0673		-2.19867	4.59055
		15.02	15.0027	27.13	12.1273		-2.13867	4.40355	3.44052	1.83235
20230012	PC12	15.02		27.18	12.1427		-2.12333	4.35699
		15.046		27.18	12.1427		-2.12333	4.35699
		15.046	15.0373	27.3	12.2627		-2.00333	4.00925	4.24108	0.200769
20230013	PC13	15.06		27.4	12.3127		-1.95333	3.87268
		15.098		27.49	12.4027		-1.86333	3.63847
		15.104	15.0873	27.65	12.5627		-1.70333	3.25653	3.58923	0.311017
20230014	PC14	15.14		27.66	12.488		-1.778	3.4295
		15.14		27.72	12.548		-1.718	3.2898
		15.236	15.172	27.72	12.548		-1.718	3.2898	3.33637	0.0806581
20230015	PC15	15.24		27.77	12.528		-1.738	3.33572
		15.24		27.77	12.528		-1.738	3.33572
		15.246	15.242	27.85	12.608		-1.658	3.15579	3.27575	0.103887
20230016	PC16	15.246		27.86	12.6013		-1.66467	3.1704
		15.254		27.92	12.6613		-1.60467	3.04125
		15.276	15.2587	27.94	12.6813		-1.58467	2.99938	3.07035	0.0891442
20230017	PC17	15.298		27.96	12.5967		-1.66933	3.18068
		15.396		27.97	12.6067		-1.65933	3.15871
		15.396	15.3633	27.97	12.6067		-1.65933	3.15871	3.16603	0.0126847
20230018	PC18	15.43		27.97	12.5333		-1.73267	3.32342
		15.44		27.97	12.5333		-1.73267	3.32342
		15.44	15.4367	27.98	12.5433		-1.72267	3.30046	3.31576	0.0132539
20230019	PC19	15.448		27.98	12.5087		-1.75733	3.38073
		15.47		27.98	12.5087		-1.75733	3.38073
		15.496	15.4713	28.15	12.6787		-1.58733	3.00493	3.25546	0.216964
20230020	PC20	15.57		28.17	12.5933		-1.67267	3.18803
		15.57		28.26	12.6833		-1.58267	2.99523
		15.59	15.5767	27.86	12.2833		-1.98267	3.95223	3.3785	0.506132
20230021	PC21	15.59		27.93	12.3147		-1.95133	3.86732
		15.61		28.68	13.0647		-1.20133	2.29952
		15.646	15.6153	27.93	12.3147		-1.95133	3.86732	3.34472	0.905168
20230022	PC22	15.648		28.44	12.764		-1.502	2.83235
		15.69		28.64	12.964		-1.302	2.4657
		15.69	15.676	28.31	12.634		-1.632	3.09942	2.79916	0.318161
20230023	PC23	15.69		28.55	12.8327		-1.43333	2.7007
		15.696		28.19	12.4727		-1.79333	3.46615
		15.766	15.7173	28.39	12.6727		-1.59333	3.01746	3.06144	0.384614
20230024	PC24	15.79		28.06	12.2533		-2.01267	4.03527
		15.79		28.66	12.8533		-1.41267	2.66229
		15.84	15.8067	28.32	12.5133		-1.75267	3.36981	3.35579	0.6866
20230025	PC25	15.846		28.52	12.6667		-1.59933	3.03003
		15.848		28.19	12.3367		-1.92933	3.80879
		15.866	15.8533	28.31	12.4567		-1.80933	3.5048	3.44788	0.392488
20230026	PC26	15.89		28.51	12.5667		-1.69933	3.24751
		15.96		28.18	12.2367		-2.02933	4.08216
		15.98	15.9433	28.88	12.9367		-1.32933	2.51287	3.28085	0.785179
20230027	PC27	15.99		28.73	12.7373		-1.52867	2.88519
		15.99		28.4	12.4073		-1.85867	3.62672
		15.998	15.9927	29.1	13.1073		-1.15867	2.23251	2.91481	0.697578
20230028	PC28	15.15		29.17	13.954		-0.312	1.24143
		15.01		29.59	14.374		0.108	0.927873
		15.488	15.216	29.81	14.594		0.328	0.79664	0.988647	0.228537
2023001	LUAD 1	14.21		27.52	12.9033		-1.36267	2.5716
		14.57		27.76	13.1433		-1.12267	2.17749
		15.07	14.6167	28.01	13.3933		-0.872667	1.83104	2.19338	0.370534
2023002	LUAD 2	14.928		29.21	13.764		-0.502	1.41618
		15.52		29.27	13.824		-0.442	1.35849
		15.89	15.446	29.87	14.424		0.158	0.896267	1.22364	0.28498
2023003	LUAD 3	15.36		29.4	14.0873		-0.178667	1.13184
		15.36		29.39	14.0773		-0.188667	1.13971
		15.218	15.3127	29.08	13.7673		-0.498667	1.41291	1.22815	0.160052
2023004	LUAD 4	15.81		29.59	13.7233		-0.542667	1.45666
		16.26		29.5	13.6333		-0.632667	1.55043
		15.53	15.8667	29.72	13.8533		-0.412667	1.33114	1.44608	0.110025
2023005	LUAD 5	15.87		28.62	12.874		-1.392	2.62442
		15.388		29.3	13.554		-0.712	1.63807
		15.98	15.746	28.81	13.064		-1.202	2.30058	2.18769	0.502772
2023006	LUAD 6	14.35		27.56	13.05		-1.216	2.32302
		14.87		27.78	13.27		-0.996	1.99446
		14.31	14.51	27.68	13.17		-1.096	2.13761	2.1517	0.16473
2023007	LUAD 7	14.19		27.36	13.0433		-1.22267	2.33378
		14.54		27.87	13.5533		-0.712667	1.63883
		14.22	14.3167	28.97	14.6533		0.387333	0.764541	1.57905	0.786324
2023008	LUAD 8	14.42		28.19	13.8833		-0.382667	1.30375
		14.31		29.09	14.7833		0.517333	0.698662
		14.19	14.3067	28.77	14.4633		0.197333	0.872161	0.958191	0.311582
2023009	LUAD 9	14.1		29.28	15.11		0.844	0.557097
		13.95		28.83	14.66		0.394	0.761017
		14.46	14.17	29.05	14.88		0.614	0.653383	0.657165	0.102013
2023010	LUAD 10	14.59		28.95	13.86		-0.406	1.32501
		15.26		28.63	13.54		-0.726	1.65405
		15.42	15.09	29.14	14.05		-0.216	1.16151	1.38019	0.250863
20230011	LUAD 11	14.26		29.1	14.0467		-0.219333	1.1642
		15.59		29.32	14.2667		0.000666667	0.999538
		15.31	15.0533	29.22	14.1667		-0.0993333	1.07128	1.07834	0.0825554
20230012	LUAD 12	15.26		28.9	14.2367		-0.0293333	1.02054
		14.42		29.41	14.7467		0.480667	0.716646
		14.31	14.6633	29.25	14.5867		0.320667	0.8007	0.845962	0.156922
20230013	LUAD 13	14.23		29.47	14.83		0.564	0.676424
		14.58		29.37	14.73		0.464	0.724973
		15.11	14.64	29.05	14.41		0.144	0.905006	0.768801	0.120429
20230014	LUAD 14	14.59		29.56	14.6467		0.380667	0.768083
		15.26		28.93	14.0167		-0.249333	1.18866
		14.89	14.9133	29.15	14.2367		-0.0293333	1.02054	0.992427	0.211692
20230015	LUAD 15	14.1		29.05	14.8733		0.607333	0.656409
		14.55		28.73	14.5533		0.287333	0.819415
		13.88	14.1767	29.24	15.0633		0.797333	0.575412	0.683745	0.124277
20230016	LUAD 16	14.97		29.79	15.12		0.854	0.553249
		13.78		29.69	15.02		0.754	0.592957
		15.26	14.67	29.37	14.7		0.434	0.740207	0.628804	0.0984991
20230017	LUAD 17	15.71		29.88	14.5433		0.277333	0.825115
		15.04		28.43	13.0933		-1.17267	2.25428
		15.26	15.3367	28.1	12.7633		-1.50267	2.83366	1.97102	1.0338
20230018	LUAD 18	14.94		27.67	13.0533		-1.21267	2.31766
		14.23		27.88	13.2633		-1.00267	2.0037
		14.68	14.6167	27.1	12.4833		-1.78267	3.44062	2.58732	0.755461
20230019	LUAD 19	15.01		28.28	13.3167		-0.949333	1.93098
		15.1		27.41	12.4467		-1.81933	3.52918
		14.78	14.9633	28.29	13.3267		-0.939333	1.91764	2.45927	0.926596
20230020	LUAD 20	14.09		27.86	13.534		-0.732	1.66094
		14.788		27.07	12.744		-1.522	2.87189
		14.1	14.326	27.29	12.964		-1.302	2.4657	2.33284	0.61631
20230021	LUAD 21	14.64		27.47	13.03		-1.236	2.35545
		13.93		27.6	13.16		-1.106	2.15248
		14.75	14.44	27.16	12.72		-1.546	2.92006	2.476	0.397738
20230022	LUAD 22	14.55		27.73	13.1667		-1.09933	2.14256
		14.31		27.94	13.3767		-0.889333	1.85232
		14.83	14.5633	28.16	13.5967		-0.669333	1.59034	1.86174	0.27623
20230023	LUAD 23	14.69		27.34	12.49		-1.776	3.42475
		15.17		27.47	12.62		-1.646	3.12965
		14.69	14.85	28.62	13.77		-0.496	1.4103	2.6549	1.08791
20230024	LUAD 24	14.55		28.19	13.0867		-1.17933	2.26472
		15.62		28.4	13.2967		-0.969333	1.95794
		15.14	15.1033	28.62	13.5167		-0.749333	1.68102	1.96789	0.29198
20230025	LUAD 25	15		28.8	13.6533		-0.612667	1.52908
		15.46		28.93	13.7833		-0.482667	1.39732
		14.98	15.1467	27.3	12.1533		-2.11267	4.3249	2.4171	1.65351
20230026	LUAD 26	14.84		27.87	13.2047		-1.06133	2.08686
		14.318		28.08	13.4147		-0.851333	1.80417
		14.838	14.6653	27.3	12.6347		-1.63133	3.09799	2.32967	0.680231
20230027	LUAD 27	14.698		27.48	13.104		-1.162	2.23767
		13.8		27.61	13.234		-1.032	2.04486
		14.63	14.376	27.49	13.114		-1.152	2.22222	2.16825	0.10714
20230028	LUAD 28	14.58		27.06	12.2333		-2.03267	4.0916
		15.02		27.27	12.4433		-1.82267	3.53734
		14.88	14.8267	27.49	12.6633		-1.60267	3.03704	3.55533	0.527511

## Sheet: CCL20
		GAPDH		CCL20
		Ct (dR)		Ct (dR)	△Ct		△△Ct	expression quantity	Mean value	error value			PC	LUAD
2023001	PC1	14.04		29.1	14.93		0.0166667	0.988514				1	1.00004	3.29646
		14.25		29.08	14.91		-0.00333333	1.00231				2	0.874587	2.30931
		14.22	14.17	29.07	14.9	14.9133	-0.0133333	1.00928	1.00004	0.0105708		3	1.36653	2.57186
2023002	PC2	13.72		29.03	15.11		0.196667	0.872564				4	1.23701	2.21549
		13.64		29.03	15.11		0.196667	0.872564				5	1.60962	2.96669
		14.4	13.92	29.02	15.1		0.186667	0.878633	0.874587	0.00350403		6	1.40879	3.47929
2023003	PC3	14.38		29.01	14.5		-0.413333	1.33176				7	2.51056	3.09319
		14.59		28.99	14.48		-0.433333	1.35035				8	2.28944	3.38851
		14.56	14.51	28.92	14.41		-0.503333	1.41748	1.36653	0.0450954		9	2.08212	2.28182
2023004	PC4	14.06		28.9	14.64		-0.273333	1.2086				10	1.8042	4.02034
		13.98		28.85	14.59		-0.323333	1.25122				11	1.68625	1.84489
		14.74	14.26	28.85	14.59		-0.323333	1.25122	1.23701	0.0246073		12	1.47775	2.23972
2023005	PC5	14.46		28.83	14.24		-0.673333	1.59475				13	1.76121	3.19695
		14.67		28.82	14.23		-0.683333	1.60585				14	2.4351	2.79598
		14.64	14.59	28.8	14.21		-0.703333	1.62826	1.60962	0.0170705		15	2.12901	3.41859
2023006	PC6	14.14		28.8	14.46		-0.453333	1.3692				16	3.16744	2.96269
		14.06		28.8	14.46		-0.453333	1.3692				17	2.3983	2.14854
		14.82	14.34	28.68	14.34		-0.573333	1.48796	1.40879	0.0685646		18	3.17623	2.90125
2023007	PC7	14.958		28.68	13.592		-1.32133	2.49897				19	3.17419	3.21215
		15.168		28.67	13.582		-1.33133	2.51635				20	2.96923	2.23979
		15.138	15.088	28.67	13.582		-1.33133	2.51635	2.51056	0.0100353		21	1.67068	2.06176
2023008	PC8	14.638		28.6	13.762		-1.15133	2.22119				22	1.15989	2.61113
		14.558		28.54	13.702		-1.21133	2.31552				23	0.996559	2.85195
		15.318	14.838	28.53	13.692		-1.22133	2.33162	2.28944	0.0596537		24	1.617	2.97968
2023009	PC9	14.498		28.5	13.872		-1.04133	2.05813				25	2.02492	2.56972
		14.708		28.48	13.852		-1.06133	2.08686				26	2.84807	3.27147
		14.678	14.628	28.47	13.842		-1.07133	2.10137	2.08212	0.0220088		27	2.11242	3.92973
2023010	PC10	14.178		28.45	14.072		-0.841333	1.79171				28	2.66842	1.82145
		14.098		28.44	14.062		-0.851333	1.80417
		14.858	14.378	28.43	14.052		-0.861333	1.81672	1.8042	0.0125057
20230011	PC11	14.1		28.43	14.2		-0.713333	1.63959
		14.31		28.4	14.17		-0.743333	1.67404
		14.28	14.23	28.34	14.11		-0.803333	1.74513	1.68625	0.0538198
20230012	PC12	13.78		28.34	14.36		-0.553333	1.46747
		13.7		28.34	14.36		-0.553333	1.46747
		14.46	13.98	28.31	14.33		-0.583333	1.49831	1.47775	0.0178024
20230013	PC13	14.39		28.53	14.1007		-0.812667	1.75646
		14.43		28.66	14.2307		-0.682667	1.6051
		14.468	14.4293	28.4	13.9707		-0.942667	1.92208	1.76121	0.15854
20230014	PC14	14.51		27.97	13.4267		-1.48667	2.80241
		14.51		28.18	13.6367		-1.27667	2.42279
		14.61	14.5433	28.4	13.8567		-1.05667	2.08012	2.4351	0.361301
20230015	PC15	14.61		28.58	13.8873		-1.026	2.03637
		14.668		28.71	14.0173		-0.896	1.8609
		14.8	14.6927	28.29	13.5973		-1.316	2.48975	2.12901	0.324498
20230016	PC16	14.81		27.86	13.0473		-1.866	3.64521
		14.81		28.07	13.2573		-1.656	3.15142
		14.818	14.8127	28.29	13.4773		-1.436	2.7057	3.16744	0.469959
20230017	PC17	14.84		28.47	13.55		-1.36333	2.57279
		14.96		28.6	13.68		-1.23333	2.3511
		14.96	14.92	28.65	13.73		-1.18333	2.27101	2.3983	0.156329
20230018	PC18	15.06		28.22	13.0433		-1.87	3.65533
		15.21		28.43	13.2533		-1.66	3.16017
		15.26	15.1767	28.65	13.4733		-1.44	2.71321	3.17623	0.471264
20230019	PC19	15.33		28.83	13.44		-1.47333	2.77663
		15.41		28.96	13.57		-1.34333	2.53737
		15.43	15.39	28.23	12.84		-2.07333	4.20858	3.17419	0.903758
20230020	PC20	15.63		28.8	13.8333		-1.08	2.11404
		14.78		28.01	13.0433		-1.87	3.65533
		14.49	14.9667	28.23	13.2633		-1.65	3.13834	2.96923	0.784436
20230021	PC21	14.51		28.41	13.8613		-1.052	2.0734
		14.558		28.54	13.9913		-0.922	1.89474
		14.578	14.5487	29.4	14.8513		-0.062	1.04391	1.67068	0.550103
20230022	PC22	14.68		28.97	14.4967		-0.416667	1.33484
		14.7		29.18	14.7067		-0.206667	1.15402
		14.04	14.4733	29.4	14.9267		0.0133333	0.990801	1.15989	0.172095
20230023	PC23	14.06		29.58	15.3173		0.404	0.75576
		14.72		29.71	15.4473		0.534	0.690637
		14.008	14.2627	28.55	14.2873		-0.626	1.54328	0.996559	0.474593
20230024	PC24	14.028		28.12	14.0173		-0.896	1.8609
		14.13		28.33	14.2273		-0.686	1.60882
		14.15	14.1027	28.55	14.4473		-0.466	1.38127	1.617	0.239917
20230025	PC25	14.86		28.73	13.85		-1.06333	2.08975
		14.88		28.86	13.98		-0.933333	1.90968
		14.9	14.88	28.74	13.86		-1.05333	2.07532	2.02492	0.100058
20230026	PC26	15.018		28.31	13.2007		-1.71267	3.27766
		15.15		28.52	13.4107		-1.50267	2.83366
		15.16	15.1093	28.74	13.6307		-1.28267	2.43288	2.84807	0.422574
20230027	PC27	15.16		28.92	13.6933		-1.22	2.32947
		15.17		29.05	13.8233		-1.09	2.12874
		15.35	15.2267	29.23	14.0033		-0.91	1.87905	2.11242	0.225654
20230028	PC28	15.428		28.8	13.2947		-1.61867	3.07091
		15.54		29.01	13.5047		-1.40867	2.65492
		15.548	15.5053	29.23	13.7247		-1.18867	2.27942	2.66842	0.395918
2023001	LUAD 1	14.04		27.67	13.3767		-1.53667	2.90123
		14.46		27.8	13.5067		-1.40667	2.65124
		14.38	14.2933	27.09	12.7967		-2.11667	4.33691	3.29646	0.909683
2023002	LUAD 2	14.958		28.66	13.8647		-1.04867	2.06862
		14.498		28.87	14.0747		-0.838667	1.7884
		14.93	14.7953	28.09	13.2947		-1.61867	3.07091	2.30931	0.674285
2023003	LUAD 3	14.1		28.27	13.54		-1.37333	2.59068
		14.92		28.4	13.67		-1.24333	2.36745
		15.17	14.73	28.18	13.45		-1.46333	2.75745	2.57186	0.195679
2023004	LUAD 4	14.69		28.47	14.0473		-0.866	1.8226
		14.55		27.96	13.5373		-1.376	2.59548
		14.028	14.4227	28.18	13.7573		-1.156	2.22839	2.21549	0.386599
2023005	LUAD 5	14.548		28.36	13.378		-1.53533	2.89855
		14.408		28.49	13.508		-1.40533	2.64879
		15.99	14.982	28.15	13.168		-1.74533	3.35272	2.96669	0.356879
2023006	LUAD 6	15.51		28.72	13.2733		-1.64	3.11666
		15.37		28.93	13.4833		-1.43	2.69447
		15.46	15.4467	28.15	12.7033		-2.21	4.62675	3.47929	1.0159
2023007	LUAD 7	14.98		28.33	13.0867		-1.82667	3.54717
		14.84		28.46	13.2167		-1.69667	3.24151
		15.91	15.2433	28.84	13.5967		-1.31667	2.4909	3.09319	0.543529
2023008	LUAD 8	15.43		28.41	12.95		-1.96333	3.89962
		15.29		28.62	13.16		-1.75333	3.37137
		15.66	15.46	28.84	13.38		-1.53333	2.89454	3.38851	0.50276
2023009	LUAD 9	15.63		29.02	13.7567		-1.15667	2.22942
		15.15		29.15	13.8867		-1.02667	2.03731
		15.01	15.2633	28.81	13.5467		-1.36667	2.57874	2.28182	0.274492
2023010	LUAD 10	15.6		28.38	12.7033		-2.21	4.62675
		15.46		28.59	12.9133		-2	4
		15.97	15.6767	28.81	13.1333		-1.78	3.43426	4.02034	0.596506
20230011	LUAD 11	15.83		28.99	14.2407		-0.672667	1.59402
		14.17		29.12	14.3707		-0.542667	1.45666
		14.248	14.7493	28.35	13.6007		-1.31267	2.484	1.84489	0.557729
20230012	LUAD 12	14.36		27.92	13.5473		-1.366	2.57755
		14.368		28.13	13.7573		-1.156	2.22839
		14.39	14.3727	28.35	13.9773		-0.936	1.91322	2.23972	0.332311
20230013	LUAD 13	14.92		28.3	13.25		-1.66333	3.16748
		15.13		28.28	13.23		-1.68333	3.21169
		15.1	15.05	28.28	13.23		-1.68333	3.21169	3.19695	0.0255283
20230014	LUAD 14	14.6		28.24	13.44		-1.47333	2.77663
		14.52		28.23	13.43		-1.48333	2.79594
		15.28	14.8	28.22	13.42		-1.49333	2.81539	2.79598	0.0193802
20230015	LUAD 15	14.93		28.22	13.16		-1.75333	3.37137
		15.14		28.19	13.13		-1.78333	3.44221
		15.11	15.06	28.19	13.13		-1.78333	3.44221	3.41859	0.0408992
20230016	LUAD 16	14.61		28.18	13.37		-1.54333	2.91467
		14.53		28.17	13.36		-1.55333	2.93494
		15.29	14.81	28.12	13.31		-1.60333	3.03845	2.96269	0.0663869
20230017	LUAD 17	14.17		28.12	13.82		-1.09333	2.13366
		14.38		28.11	13.81		-1.10333	2.14851
		14.35	14.3	28.1	13.8		-1.11333	2.16345	2.14854	0.0148925
20230018	LUAD 18	14.85		28.1	13.3833		-1.53	2.88786
		14.77		28.09	13.3733		-1.54	2.90795
		14.53	14.7167	28.09	13.3733		-1.54	2.90795	2.90125	0.011597
20230019	LUAD 19	14.69		28.08	13.26		-1.65333	3.1456
		14.9		28.05	13.23		-1.68333	3.21169
		14.87	14.82	28.02	13.2		-1.71333	3.27918	3.21215	0.0667913
20230020	LUAD 20	14.37		28	13.7633		-1.15	2.21914
		14.29		27.98	13.7433		-1.17	2.25012
		14.05	14.2367	27.98	13.7433		-1.17	2.25012	2.23979	0.0178852
20230021	LUAD 21	14.558		28.98	14.292		-0.621333	1.5383
		14.768		27.97	13.282		-1.63133	3.09799
		14.738	14.688	28.97	14.282		-0.631333	1.549	2.06176	0.897418
20230022	LUAD 22	14.238		27.97	13.532		-1.38133	2.60509
		14.158		27.97	13.532		-1.38133	2.60509
		14.918	14.438	27.96	13.522		-1.39133	2.62321	2.61113	0.0104615
20230023	LUAD 23	14.578		28.17	13.462		-1.45133	2.73461
		14.788		27.92	13.212		-1.70133	3.25201
		14.758	14.708	28.26	13.552		-1.36133	2.56923	2.85195	0.356198
20230024	LUAD 24	14.258		27.85	13.392		-1.52133	2.87056
		14.178		27.77	13.312		-1.60133	3.03424
		14.938	14.458	27.77	13.312		-1.60133	3.03424	2.97968	0.0944971
20230025	LUAD 25	15.018		28.72	13.572		-1.34133	2.53385
		15.228		28.72	13.572		-1.34133	2.53385
		15.198	15.148	28.66	13.512		-1.40133	2.64146	2.56972	0.0621241
20230026	LUAD 26	14.2698		27.65	13.3437		-1.5696	2.96822
		14.271		27.49	13.1837		-1.7296	3.31636
		14.378	14.3063	27.4	13.0937		-1.8196	3.52983	3.27147	0.283482
20230027	LUAD 27	15.15		28.3	13.02		-1.89333	3.71493
		15.36		28.18	12.9		-2.01333	4.03714
		15.33	15.28	28.18	12.9		-2.01333	4.03714	3.92973	0.18603
20230028	LUAD 28	14.83		28.13	13.1		-1.81333	3.51453
		14.75		287.07	272.04		257.127	3.95513e-78
		15.51	15.03	28.98	13.95		-0.963333	1.94981	1.82145	1.76078
