# Supplementary material for: Integrative analyses of single-cell and bulk RNA sequencing to construct the tumor-associated macrophage-related prognostic signature in lung adenocarcinoma
Source: PeerJ journal article supplement (doi:10.7717/peerj.19920), 2025-09-01
Supplement: Supplementary_Tables.xlsx [file Supplementary_Tables.xlsx]

## Sheet: Table Legends
Table Legends
Table S1 Tumor-associated macrophages in TCGA-LUAD cohort.
Table S2 DE-lncRNAs in TCGA-LUAD cohort.
Table S3 DE-miRNAs in TCGA-LUAD cohort.
Table S4 DEGs in TCGA-LUAD cohort.
Table S5 Genes and their coefficients in LASSO regression model.
Table S6 Risk score of each sample was calculated.
Table S7 Statistical significances of drugs between high- and low-risk groups based on GDSC database.
Table S8 miRNA-mRNA pairs which predicted based on online databases.
Table S9 miRNA-risk gene pairs which predicted based on online databases.
Table S10 LncRNA-miRNA pairs were predicted based on Starbase.

## Sheet: Table S1
Table S1 Tumor-associated macrophages in TCGA-LUAD cohort.
Gene Symbol	Description	Category	Gifts	GC Id	Relevance score	GeneCards Link
CSF1	Colony Stimulating Factor 1	Protein Coding	51	GC01P109911	41.7552	https://www.genecards.org/cgi-bin/carddisp.pl?gene=CSF1
CSF2	Colony Stimulating Factor 2	Protein Coding	51	GC05P132073	38.9132	https://www.genecards.org/cgi-bin/carddisp.pl?gene=CSF2
MIF	Macrophage Migration Inhibitory Factor	Protein Coding	55	GC22P023894	33.754	https://www.genecards.org/cgi-bin/carddisp.pl?gene=MIF
TNF	Tumor Necrosis Factor	Protein Coding	59	GC06P092154	29.8821	https://www.genecards.org/cgi-bin/carddisp.pl?gene=TNF
IL10	Interleukin 10	Protein Coding	55	GC01M206767	26.3156	https://www.genecards.org/cgi-bin/carddisp.pl?gene=IL10
CSF1R	Colony Stimulating Factor 1 Receptor	Protein Coding	59	GC05M150053	25.853	https://www.genecards.org/cgi-bin/carddisp.pl?gene=CSF1R
TACSTD2	Tumor Associated Calcium Signal Transducer 2	Protein Coding	52	GC01M058575	25.5994	https://www.genecards.org/cgi-bin/carddisp.pl?gene=TACSTD2
IFNG	Interferon Gamma	Protein Coding	57	GC12M068154	24.1323	https://www.genecards.org/cgi-bin/carddisp.pl?gene=IFNG
MSR1	Macrophage Scavenger Receptor 1	Protein Coding	52	GC08M016107	23.5538	https://www.genecards.org/cgi-bin/carddisp.pl?gene=MSR1
CD163	CD163 Molecule	Protein Coding	51	GC12M008027	23.4698	https://www.genecards.org/cgi-bin/carddisp.pl?gene=CD163
IL6	Interleukin 6	Protein Coding	58	GC07P022725	23.3075	https://www.genecards.org/cgi-bin/carddisp.pl?gene=IL6
CCL3	C-C Motif Chemokine Ligand 3	Protein Coding	46	GC17M036088	23.1522	https://www.genecards.org/cgi-bin/carddisp.pl?gene=CCL3
IL1B	Interleukin 1 Beta	Protein Coding	54	GC02M112829	22.9728	https://www.genecards.org/cgi-bin/carddisp.pl?gene=IL1B
CCL2	C-C Motif Chemokine Ligand 2	Protein Coding	56	GC17P034255	22.2163	https://www.genecards.org/cgi-bin/carddisp.pl?gene=CCL2
CXCL8	C-X-C Motif Chemokine Ligand 8	Protein Coding	50	GC04P073740	21.4061	https://www.genecards.org/cgi-bin/carddisp.pl?gene=CXCL8
CCR5	C-C Motif Chemokine Receptor 5	Protein Coding	53	GC03P047615	20.9844	https://www.genecards.org/cgi-bin/carddisp.pl?gene=CCR5
HLA-DRB1	Major Histocompatibility Complex, Class II, DR Beta 1	Protein Coding	53	GC06M071772	20.6128	https://www.genecards.org/cgi-bin/carddisp.pl?gene=HLA-DRB1
CD68	CD68 Molecule	Protein Coding	47	GC17P007579	20.5667	https://www.genecards.org/cgi-bin/carddisp.pl?gene=CD68
TLR4	Toll Like Receptor 4	Protein Coding	58	GC09P117704	19.8036	https://www.genecards.org/cgi-bin/carddisp.pl?gene=TLR4
CCL5	C-C Motif Chemokine Ligand 5	Protein Coding	51	GC17M035871	19.0406	https://www.genecards.org/cgi-bin/carddisp.pl?gene=CCL5
PRF1	Perforin 1	Protein Coding	53	GC10M070597	17.5379	https://www.genecards.org/cgi-bin/carddisp.pl?gene=PRF1
MST1R	Macrophage Stimulating 1 Receptor	Protein Coding	56	GC03M051598	17.0852	https://www.genecards.org/cgi-bin/carddisp.pl?gene=MST1R
CD14	CD14 Molecule	Protein Coding	53	GC05M140631	16.7143	https://www.genecards.org/cgi-bin/carddisp.pl?gene=CD14
MRC1	Mannose Receptor C-Type 1	Protein Coding	46	GC10P017809	16.5806	https://www.genecards.org/cgi-bin/carddisp.pl?gene=MRC1
MMP9	Matrix Metallopeptidase 9	Protein Coding	61	GC20P046008	16.4121	https://www.genecards.org/cgi-bin/carddisp.pl?gene=MMP9
IL4	Interleukin 4	Protein Coding	53	GC05P132673	16.2852	https://www.genecards.org/cgi-bin/carddisp.pl?gene=IL4
CD36	CD36 Molecule	Protein Coding	56	GC07P080369	16.2609	https://www.genecards.org/cgi-bin/carddisp.pl?gene=CD36
ABCA1	ATP Binding Cassette Subfamily A Member 1	Protein Coding	55	GC09M104781	16.1177	https://www.genecards.org/cgi-bin/carddisp.pl?gene=ABCA1
NOS2	Nitric Oxide Synthase 2	Protein Coding	56	GC17M027756	15.7307	https://www.genecards.org/cgi-bin/carddisp.pl?gene=NOS2
MST1	Macrophage Stimulating 1	Protein Coding	53	GC03M049683	15.6464	https://www.genecards.org/cgi-bin/carddisp.pl?gene=MST1
MMP12	Matrix Metallopeptidase 12	Protein Coding	53	GC11M102862	15.537	https://www.genecards.org/cgi-bin/carddisp.pl?gene=MMP12
CCR1	C-C Motif Chemokine Receptor 1	Protein Coding	52	GC03M046218	15.5163	https://www.genecards.org/cgi-bin/carddisp.pl?gene=CCR1
CCL4	C-C Motif Chemokine Ligand 4	Protein Coding	47	GC17P036103	15.4694	https://www.genecards.org/cgi-bin/carddisp.pl?gene=CCL4
ITGAM	Integrin Subunit Alpha M	Protein Coding	55	GC16P042850	15.3611	https://www.genecards.org/cgi-bin/carddisp.pl?gene=ITGAM
MARCO	Macrophage Receptor With Collagenous Structure	Protein Coding	48	GC02P118942	15.0907	https://www.genecards.org/cgi-bin/carddisp.pl?gene=MARCO
CSF3	Colony Stimulating Factor 3	Protein Coding	47	GC17P040015	15.0863	https://www.genecards.org/cgi-bin/carddisp.pl?gene=CSF3
PPARG	Peroxisome Proliferator Activated Receptor Gamma	Protein Coding	60	GC03P012287	15.0675	https://www.genecards.org/cgi-bin/carddisp.pl?gene=PPARG
STAT3	Signal Transducer And Activator Of Transcription 3	Protein Coding	61	GC17M042313	14.769	https://www.genecards.org/cgi-bin/carddisp.pl?gene=STAT3
IL3	Interleukin 3	Protein Coding	52	GC05P132060	14.6262	https://www.genecards.org/cgi-bin/carddisp.pl?gene=IL3
TGFB1	Transforming Growth Factor Beta 1	Protein Coding	60	GC19M041301	14.6151	https://www.genecards.org/cgi-bin/carddisp.pl?gene=TGFB1
IL1A	Interleukin 1 Alpha	Protein Coding	52	GC02M112773	14.5925	https://www.genecards.org/cgi-bin/carddisp.pl?gene=IL1A
CCL18	C-C Motif Chemokine Ligand 18	Protein Coding	42	GC17P036064	14.2778	https://www.genecards.org/cgi-bin/carddisp.pl?gene=CCL18
CXCR4	C-X-C Motif Chemokine Receptor 4	Protein Coding	59	GC02M136114	13.3331	https://www.genecards.org/cgi-bin/carddisp.pl?gene=CXCR4
LPL	Lipoprotein Lipase	Protein Coding	56	GC08P019901	13.1106	https://www.genecards.org/cgi-bin/carddisp.pl?gene=LPL
IL18	Interleukin 18	Protein Coding	50	GC11M112143	13.0079	https://www.genecards.org/cgi-bin/carddisp.pl?gene=IL18
CCR2	C-C Motif Chemokine Receptor 2	Protein Coding	52	GC03P047614	12.8903	https://www.genecards.org/cgi-bin/carddisp.pl?gene=CCR2
MUC1	Mucin 1, Cell Surface Associated	Protein Coding	55	GC01M155185	12.7764	https://www.genecards.org/cgi-bin/carddisp.pl?gene=MUC1
PIK3CG	Phosphatidylinositol-4,5-Bisphosphate 3-Kinase Catalytic Subunit Gamma	Protein Coding	55	GC07P106865	12.7264	https://www.genecards.org/cgi-bin/carddisp.pl?gene=PIK3CG
NLRP3	NLR Family Pyrin Domain Containing 3	Protein Coding	55	GC01P247415	12.7179	https://www.genecards.org/cgi-bin/carddisp.pl?gene=NLRP3
HMGB1	High Mobility Group Box 1	Protein Coding	54	GC13M030456	12.6891	https://www.genecards.org/cgi-bin/carddisp.pl?gene=HMGB1
STAT1	Signal Transducer And Activator Of Transcription 1	Protein Coding	60	GC02M190908	12.634	https://www.genecards.org/cgi-bin/carddisp.pl?gene=STAT1
APOE	Apolipoprotein E	Protein Coding	57	GC19P073055	12.6053	https://www.genecards.org/cgi-bin/carddisp.pl?gene=APOE
PTGS2	Prostaglandin-Endoperoxide Synthase 2	Protein Coding	56	GC01M186671	12.3839	https://www.genecards.org/cgi-bin/carddisp.pl?gene=PTGS2
VEGFA	Vascular Endothelial Growth Factor A	Protein Coding	56	GC06P043770	12.3263	https://www.genecards.org/cgi-bin/carddisp.pl?gene=VEGFA
ICAM1	Intercellular Adhesion Molecule 1	Protein Coding	57	GC19P010749	12.2041	https://www.genecards.org/cgi-bin/carddisp.pl?gene=ICAM1
IL2	Interleukin 2	Protein Coding	53	GC04M122451	12.0426	https://www.genecards.org/cgi-bin/carddisp.pl?gene=IL2
CCL22	C-C Motif Chemokine Ligand 22	Protein Coding	44	GC16P057359	11.9691	https://www.genecards.org/cgi-bin/carddisp.pl?gene=CCL22
ITGB2	Integrin Subunit Beta 2	Protein Coding	57	GC21M044885	11.9582	https://www.genecards.org/cgi-bin/carddisp.pl?gene=ITGB2
CD274	CD274 Molecule	Protein Coding	52	GC09P005450	11.9363	https://www.genecards.org/cgi-bin/carddisp.pl?gene=CD274
CAPG	Capping Actin Protein, Gelsolin Like	Protein Coding	48	GC02M085391	11.8067	https://www.genecards.org/cgi-bin/carddisp.pl?gene=CAPG
SLC40A1	Solute Carrier Family 40 Member 1	Protein Coding	53	GC02M189560	11.5474	https://www.genecards.org/cgi-bin/carddisp.pl?gene=SLC40A1
CX3CR1	C-X3-C Motif Chemokine Receptor 1	Protein Coding	50	GC03M039279	11.4659	https://www.genecards.org/cgi-bin/carddisp.pl?gene=CX3CR1
JUN	Jun Proto-Oncogene, AP-1 Transcription Factor Subunit	Protein Coding	55	GC01M058780	11.4411	https://www.genecards.org/cgi-bin/carddisp.pl?gene=JUN
CXCL12	C-X-C Motif Chemokine Ligand 12	Protein Coding	51	GC10M044370	11.4311	https://www.genecards.org/cgi-bin/carddisp.pl?gene=CXCL12
CCL20	C-C Motif Chemokine Ligand 20	Protein Coding	49	GC02P227846	11.4	https://www.genecards.org/cgi-bin/carddisp.pl?gene=CCL20
MAPK1	Mitogen-Activated Protein Kinase 1	Protein Coding	59	GC22M021759	11.3312	https://www.genecards.org/cgi-bin/carddisp.pl?gene=MAPK1
NFKB1	Nuclear Factor Kappa B Subunit 1	Protein Coding	60	GC04P102501	11.2912	https://www.genecards.org/cgi-bin/carddisp.pl?gene=NFKB1
CD209	CD209 Molecule	Protein Coding	50	GC19M007739	11.2661	https://www.genecards.org/cgi-bin/carddisp.pl?gene=CD209
ETAA1	ETAA1 Activator Of ATR Kinase	Protein Coding	39	GC02P067397	11.2275	https://www.genecards.org/cgi-bin/carddisp.pl?gene=ETAA1
SPI1	Spi-1 Proto-Oncogene	Protein Coding	50	GC11M099368	11.1298	https://www.genecards.org/cgi-bin/carddisp.pl?gene=SPI1
IL13	Interleukin 13	Protein Coding	50	GC05P132656	10.8753	https://www.genecards.org/cgi-bin/carddisp.pl?gene=IL13
IRF8	Interferon Regulatory Factor 8	Protein Coding	52	GC16P085898	10.7524	https://www.genecards.org/cgi-bin/carddisp.pl?gene=IRF8
KITLG	KIT Ligand	Protein Coding	53	GC12M088492	10.5076	https://www.genecards.org/cgi-bin/carddisp.pl?gene=KITLG
HAVCR2	Hepatitis A Virus Cellular Receptor 2	Protein Coding	52	GC05M157063	10.432	https://www.genecards.org/cgi-bin/carddisp.pl?gene=HAVCR2
CD40	CD40 Molecule	Protein Coding	57	GC20P046118	10.3569	https://www.genecards.org/cgi-bin/carddisp.pl?gene=CD40
IL12B	Interleukin 12B	Protein Coding	51	GC05M159314	10.276	https://www.genecards.org/cgi-bin/carddisp.pl?gene=IL12B
JAK2	Janus Kinase 2	Protein Coding	60	GC09P004985	10.0644	https://www.genecards.org/cgi-bin/carddisp.pl?gene=JAK2
MAPK14	Mitogen-Activated Protein Kinase 14	Protein Coding	58	GC06P092286	9.99711	https://www.genecards.org/cgi-bin/carddisp.pl?gene=MAPK14
LGALS3	Galectin 3	Protein Coding	52	GC14P055124	9.98991	https://www.genecards.org/cgi-bin/carddisp.pl?gene=LGALS3
CD44	CD44 Molecule (Indian Blood Group)	Protein Coding	55	GC11P035139	9.97465	https://www.genecards.org/cgi-bin/carddisp.pl?gene=CD44
IDO1	Indoleamine 2,3-Dioxygenase 1	Protein Coding	53	GC08P039891	9.94905	https://www.genecards.org/cgi-bin/carddisp.pl?gene=IDO1
TLR3	Toll Like Receptor 3	Protein Coding	58	GC04P186059	9.91588	https://www.genecards.org/cgi-bin/carddisp.pl?gene=TLR3
GDF15	Growth Differentiation Factor 15	Protein Coding	50	GC19P072428	9.87944	https://www.genecards.org/cgi-bin/carddisp.pl?gene=GDF15
CXCL10	C-X-C Motif Chemokine Ligand 10	Protein Coding	51	GC04M076021	9.87175	https://www.genecards.org/cgi-bin/carddisp.pl?gene=CXCL10
IL5	Interleukin 5	Protein Coding	52	GC05M132541	9.79224	https://www.genecards.org/cgi-bin/carddisp.pl?gene=IL5
SIRPA	Signal Regulatory Protein Alpha	Protein Coding	52	GC20P001894	9.72364	https://www.genecards.org/cgi-bin/carddisp.pl?gene=SIRPA
CRP	C-Reactive Protein	Protein Coding	53	GC01M159729	9.71953	https://www.genecards.org/cgi-bin/carddisp.pl?gene=CRP
LIPA	Lipase A, Lysosomal Acid Type	Protein Coding	55	GC10M089213	9.71829	https://www.genecards.org/cgi-bin/carddisp.pl?gene=LIPA
CD74	CD74 Molecule	Protein Coding	51	GC05M150378	9.60792	https://www.genecards.org/cgi-bin/carddisp.pl?gene=CD74
TP53	Tumor Protein P53	Protein Coding	60	GC17M007661	9.55367	https://www.genecards.org/cgi-bin/carddisp.pl?gene=TP53
CXCL2	C-X-C Motif Chemokine Ligand 2	Protein Coding	46	GC04M074097	9.52597	https://www.genecards.org/cgi-bin/carddisp.pl?gene=CXCL2
MAPK8	Mitogen-Activated Protein Kinase 8	Protein Coding	57	GC10P048306	9.49155	https://www.genecards.org/cgi-bin/carddisp.pl?gene=MAPK8
SYK	Spleen Associated Tyrosine Kinase	Protein Coding	56	GC09P092704	9.47238	https://www.genecards.org/cgi-bin/carddisp.pl?gene=SYK
FAS	Fas Cell Surface Death Receptor	Protein Coding	57	GC10P094616	9.45951	https://www.genecards.org/cgi-bin/carddisp.pl?gene=FAS
P2RX7	Purinergic Receptor P2X 7	Protein Coding	54	GC12P126979	9.44964	https://www.genecards.org/cgi-bin/carddisp.pl?gene=P2RX7
IL17A	Interleukin 17A	Protein Coding	50	GC06P052186	9.42539	https://www.genecards.org/cgi-bin/carddisp.pl?gene=IL17A
SPP1	Secreted Phosphoprotein 1	Protein Coding	53	GC04P087975	9.41345	https://www.genecards.org/cgi-bin/carddisp.pl?gene=SPP1
CCR6	C-C Motif Chemokine Receptor 6	Protein Coding	51	GC06P167111	9.38827	https://www.genecards.org/cgi-bin/carddisp.pl?gene=CCR6
EPCAM	Epithelial Cell Adhesion Molecule	Protein Coding	56	GC02P047345	9.38274	https://www.genecards.org/cgi-bin/carddisp.pl?gene=EPCAM
HIF1A	Hypoxia Inducible Factor 1 Subunit Alpha	Protein Coding	54	GC14P061695	9.27823	https://www.genecards.org/cgi-bin/carddisp.pl?gene=HIF1A
BMP6	Bone Morphogenetic Protein 6	Protein Coding	50	GC06P007726	9.24294	https://www.genecards.org/cgi-bin/carddisp.pl?gene=BMP6
CHI3L1	Chitinase 3 Like 1	Protein Coding	51	GC01M203148	9.21286	https://www.genecards.org/cgi-bin/carddisp.pl?gene=CHI3L1
PTK2B	Protein Tyrosine Kinase 2 Beta	Protein Coding	55	GC08P027311	9.21214	https://www.genecards.org/cgi-bin/carddisp.pl?gene=PTK2B
IFNA1	Interferon Alpha 1	Protein Coding	45	GC09P021611	9.19665	https://www.genecards.org/cgi-bin/carddisp.pl?gene=IFNA1
PRKCA	Protein Kinase C Alpha	Protein Coding	57	GC17P066302	9.16626	https://www.genecards.org/cgi-bin/carddisp.pl?gene=PRKCA
TNFSF11	TNF Superfamily Member 11	Protein Coding	56	GC13P042562	9.12634	https://www.genecards.org/cgi-bin/carddisp.pl?gene=TNFSF11
CTNNB1	Catenin Beta 1	Protein Coding	60	GC03P041194	9.07175	https://www.genecards.org/cgi-bin/carddisp.pl?gene=CTNNB1
IL34	Interleukin 34	Protein Coding	46	GC16P072313	9.05865	https://www.genecards.org/cgi-bin/carddisp.pl?gene=IL34
CCR3	C-C Motif Chemokine Receptor 3	Protein Coding	52	GC03P047610	8.994	https://www.genecards.org/cgi-bin/carddisp.pl?gene=CCR3
CD86	CD86 Molecule	Protein Coding	51	GC03P122055	8.96366	https://www.genecards.org/cgi-bin/carddisp.pl?gene=CD86
HMOX1	Heme Oxygenase 1	Protein Coding	59	GC22P035380	8.95848	https://www.genecards.org/cgi-bin/carddisp.pl?gene=HMOX1
CCL11	C-C Motif Chemokine Ligand 11	Protein Coding	52	GC17P034285	8.88898	https://www.genecards.org/cgi-bin/carddisp.pl?gene=CCL11
MYC	MYC Proto-Oncogene, BHLH Transcription Factor	Protein Coding	59	GC08P127735	8.88269	https://www.genecards.org/cgi-bin/carddisp.pl?gene=MYC
IL15	Interleukin 15	Protein Coding	49	GC04P141636	8.86554	https://www.genecards.org/cgi-bin/carddisp.pl?gene=IL15
SIGLEC1	Sialic Acid Binding Ig Like Lectin 1	Protein Coding	47	GC20M003686	8.8322	https://www.genecards.org/cgi-bin/carddisp.pl?gene=SIGLEC1
CLEC10A	C-Type Lectin Domain Containing 10A	Protein Coding	46	GC17M007074	8.82557	https://www.genecards.org/cgi-bin/carddisp.pl?gene=CLEC10A
PRTN3	Proteinase 3	Protein Coding	52	GC19P000840	8.71338	https://www.genecards.org/cgi-bin/carddisp.pl?gene=PRTN3
CD80	CD80 Molecule	Protein Coding	51	GC03M119524	8.71038	https://www.genecards.org/cgi-bin/carddisp.pl?gene=CD80
CCR4	C-C Motif Chemokine Receptor 4	Protein Coding	51	GC03P032951	8.70266	https://www.genecards.org/cgi-bin/carddisp.pl?gene=CCR4
CCL7	C-C Motif Chemokine Ligand 7	Protein Coding	50	GC17P034270	8.6887	https://www.genecards.org/cgi-bin/carddisp.pl?gene=CCL7
CD47	CD47 Molecule	Protein Coding	51	GC03M108043	8.66848	https://www.genecards.org/cgi-bin/carddisp.pl?gene=CD47
IL4I1	Interleukin 4 Induced 1	Protein Coding	46	GC19M070913	8.66681	https://www.genecards.org/cgi-bin/carddisp.pl?gene=IL4I1
LIF	LIF Interleukin 6 Family Cytokine	Protein Coding	50	GC22M030240	8.64261	https://www.genecards.org/cgi-bin/carddisp.pl?gene=LIF
NFKBIA	NFKB Inhibitor Alpha	Protein Coding	57	GC14M035401	8.54583	https://www.genecards.org/cgi-bin/carddisp.pl?gene=NFKBIA
CCR8	C-C Motif Chemokine Receptor 8	Protein Coding	48	GC03P039983	8.53739	https://www.genecards.org/cgi-bin/carddisp.pl?gene=CCR8
MYD88	MYD88 Innate Immune Signal Transduction Adaptor	Protein Coding	56	GC03P038152	8.49757	https://www.genecards.org/cgi-bin/carddisp.pl?gene=MYD88
AKT1	AKT Serine/Threonine Kinase 1	Protein Coding	61	GC14M104769	8.46136	https://www.genecards.org/cgi-bin/carddisp.pl?gene=AKT1
S100A9	S100 Calcium Binding Protein A9	Protein Coding	50	GC01P153357	8.45174	https://www.genecards.org/cgi-bin/carddisp.pl?gene=S100A9
ARG1	Arginase 1	Protein Coding	56	GC06P131473	8.39935	https://www.genecards.org/cgi-bin/carddisp.pl?gene=ARG1
HAMP	Hepcidin Antimicrobial Peptide	Protein Coding	50	GC19P072728	8.37646	https://www.genecards.org/cgi-bin/carddisp.pl?gene=HAMP
MAP2K1	Mitogen-Activated Protein Kinase Kinase 1	Protein Coding	60	GC15P066386	8.37552	https://www.genecards.org/cgi-bin/carddisp.pl?gene=MAP2K1
CTLA4	Cytotoxic T-Lymphocyte Associated Protein 4	Protein Coding	54	GC02P203854	8.27008	https://www.genecards.org/cgi-bin/carddisp.pl?gene=CTLA4
FTH1	Ferritin Heavy Chain 1	Protein Coding	57	GC11M061959	8.25337	https://www.genecards.org/cgi-bin/carddisp.pl?gene=FTH1
BRAF	B-Raf Proto-Oncogene, Serine/Threonine Kinase	Protein Coding	60	GC07M140742	8.23838	https://www.genecards.org/cgi-bin/carddisp.pl?gene=BRAF
EBAG9	Estrogen Receptor Binding Site Associated Antigen 9	Protein Coding	44	GC08P109536	8.22583	https://www.genecards.org/cgi-bin/carddisp.pl?gene=EBAG9
FASLG	Fas Ligand	Protein Coding	55	GC01P172628	8.19979	https://www.genecards.org/cgi-bin/carddisp.pl?gene=FASLG
RELA	RELA Proto-Oncogene, NF-KB Subunit	Protein Coding	59	GC11M065653	8.19427	https://www.genecards.org/cgi-bin/carddisp.pl?gene=RELA
PLA2G7	Phospholipase A2 Group VII	Protein Coding	56	GC06M046704	8.16056	https://www.genecards.org/cgi-bin/carddisp.pl?gene=PLA2G7
FN1	Fibronectin 1	Protein Coding	57	GC02M215360	8.13218	https://www.genecards.org/cgi-bin/carddisp.pl?gene=FN1
TNFRSF1A	TNF Receptor Superfamily Member 1A	Protein Coding	57	GC12M006328	8.08608	https://www.genecards.org/cgi-bin/carddisp.pl?gene=TNFRSF1A
IL1RN	Interleukin 1 Receptor Antagonist	Protein Coding	57	GC02P123802	8.05685	https://www.genecards.org/cgi-bin/carddisp.pl?gene=IL1RN
MAPK10	Mitogen-Activated Protein Kinase 10	Protein Coding	56	GC04M085990	7.97645	https://www.genecards.org/cgi-bin/carddisp.pl?gene=MAPK10
FCGR1A	Fc Gamma Receptor Ia	Protein Coding	48	GC01P150388	7.97368	https://www.genecards.org/cgi-bin/carddisp.pl?gene=FCGR1A
PYCARD	PYD And CARD Domain Containing	Protein Coding	48	GC16M031201	7.97135	https://www.genecards.org/cgi-bin/carddisp.pl?gene=PYCARD
CD9	CD9 Molecule	Protein Coding	51	GC12P023510	7.93522	https://www.genecards.org/cgi-bin/carddisp.pl?gene=CD9
PLAU	Plasminogen Activator, Urokinase	Protein Coding	59	GC10P073909	7.93019	https://www.genecards.org/cgi-bin/carddisp.pl?gene=PLAU
CXCR1	C-X-C Motif Chemokine Receptor 1	Protein Coding	50	GC02M218162	7.92787	https://www.genecards.org/cgi-bin/carddisp.pl?gene=CXCR1
LGALS3BP	Galectin 3 Binding Protein	Protein Coding	48	GC17M078971	7.91393	https://www.genecards.org/cgi-bin/carddisp.pl?gene=LGALS3BP
BCL2	BCL2 Apoptosis Regulator	Protein Coding	57	GC18M063123	7.88052	https://www.genecards.org/cgi-bin/carddisp.pl?gene=BCL2
CCL15	C-C Motif Chemokine Ligand 15	Protein Coding	42	GC17M035996	7.85307	https://www.genecards.org/cgi-bin/carddisp.pl?gene=CCL15
PLA2G4A	Phospholipase A2 Group IVA	Protein Coding	55	GC01P186798	7.8453	https://www.genecards.org/cgi-bin/carddisp.pl?gene=PLA2G4A
HLA-DPB1	Major Histocompatibility Complex, Class II, DP Beta 1	Protein Coding	51	GC06P092189	7.84413	https://www.genecards.org/cgi-bin/carddisp.pl?gene=HLA-DPB1
VCAM1	Vascular Cell Adhesion Molecule 1	Protein Coding	52	GC01P100719	7.83289	https://www.genecards.org/cgi-bin/carddisp.pl?gene=VCAM1
F3	Coagulation Factor III, Tissue Factor	Protein Coding	52	GC01M094610	7.82421	https://www.genecards.org/cgi-bin/carddisp.pl?gene=F3
TLR7	Toll Like Receptor 7	Protein Coding	55	GC0XP012867	7.82393	https://www.genecards.org/cgi-bin/carddisp.pl?gene=TLR7
CDKN2A	Cyclin Dependent Kinase Inhibitor 2A	Protein Coding	57	GC09M021967	7.8213	https://www.genecards.org/cgi-bin/carddisp.pl?gene=CDKN2A
GC	GC Vitamin D Binding Protein	Protein Coding	51	GC04M071741	7.81556	https://www.genecards.org/cgi-bin/carddisp.pl?gene=GC
MAPK3	Mitogen-Activated Protein Kinase 3	Protein Coding	56	GC16M038440	7.80167	https://www.genecards.org/cgi-bin/carddisp.pl?gene=MAPK3
CCND1	Cyclin D1	Protein Coding	60	GC11P069641	7.7925	https://www.genecards.org/cgi-bin/carddisp.pl?gene=CCND1
CIITA	Class II Major Histocompatibility Complex Transactivator	Protein Coding	51	GC16P013730	7.7882	https://www.genecards.org/cgi-bin/carddisp.pl?gene=CIITA
TREM2	Triggering Receptor Expressed On Myeloid Cells 2	Protein Coding	51	GC06M071918	7.75974	https://www.genecards.org/cgi-bin/carddisp.pl?gene=TREM2
PPARA	Peroxisome Proliferator Activated Receptor Alpha	Protein Coding	51	GC22P046150	7.74945	https://www.genecards.org/cgi-bin/carddisp.pl?gene=PPARA
HCK	HCK Proto-Oncogene, Src Family Tyrosine Kinase	Protein Coding	54	GC20P032052	7.72306	https://www.genecards.org/cgi-bin/carddisp.pl?gene=HCK
MAFB	MAF BZIP Transcription Factor B	Protein Coding	50	GC20M040685	7.64532	https://www.genecards.org/cgi-bin/carddisp.pl?gene=MAFB
MRC2	Mannose Receptor C Type 2	Protein Coding	48	GC17P062627	7.63464	https://www.genecards.org/cgi-bin/carddisp.pl?gene=MRC2
CXCL1	C-X-C Motif Chemokine Ligand 1	Protein Coding	50	GC04P073869	7.61466	https://www.genecards.org/cgi-bin/carddisp.pl?gene=CXCL1
IL4R	Interleukin 4 Receptor	Protein Coding	55	GC16P042490	7.60152	https://www.genecards.org/cgi-bin/carddisp.pl?gene=IL4R
IL2RA	Interleukin 2 Receptor Subunit Alpha	Protein Coding	57	GC10M006010	7.57106	https://www.genecards.org/cgi-bin/carddisp.pl?gene=IL2RA
ITGAL	Integrin Subunit Alpha L	Protein Coding	53	GC16P030472	7.5698	https://www.genecards.org/cgi-bin/carddisp.pl?gene=ITGAL
IL7	Interleukin 7	Protein Coding	50	GC08M078689	7.56569	https://www.genecards.org/cgi-bin/carddisp.pl?gene=IL7
MMP2	Matrix Metallopeptidase 2	Protein Coding	60	GC16P055390	7.56026	https://www.genecards.org/cgi-bin/carddisp.pl?gene=MMP2
HLA-G	Major Histocompatibility Complex, Class I, G	Protein Coding	50	GC06P092102	7.50205	https://www.genecards.org/cgi-bin/carddisp.pl?gene=HLA-G
MMP1	Matrix Metallopeptidase 1	Protein Coding	57	GC11M102810	7.48619	https://www.genecards.org/cgi-bin/carddisp.pl?gene=MMP1
S100A8	S100 Calcium Binding Protein A8	Protein Coding	48	GC01M153391	7.47762	https://www.genecards.org/cgi-bin/carddisp.pl?gene=S100A8
FLT1	Fms Related Receptor Tyrosine Kinase 1	Protein Coding	57	GC13M028300	7.46719	https://www.genecards.org/cgi-bin/carddisp.pl?gene=FLT1
SPINK1	Serine Peptidase Inhibitor Kazal Type 1	Protein Coding	48	GC05M147825	7.45571	https://www.genecards.org/cgi-bin/carddisp.pl?gene=SPINK1
CXCL9	C-X-C Motif Chemokine Ligand 9	Protein Coding	47	GC04M076001	7.45493	https://www.genecards.org/cgi-bin/carddisp.pl?gene=CXCL9
THBS1	Thrombospondin 1	Protein Coding	52	GC15P039581	7.45052	https://www.genecards.org/cgi-bin/carddisp.pl?gene=THBS1
CXCR2	C-X-C Motif Chemokine Receptor 2	Protein Coding	57	GC02P218125	7.44888	https://www.genecards.org/cgi-bin/carddisp.pl?gene=CXCR2
HGF	Hepatocyte Growth Factor	Protein Coding	58	GC07M081699	7.40429	https://www.genecards.org/cgi-bin/carddisp.pl?gene=HGF
TLR9	Toll Like Receptor 9	Protein Coding	53	GC03M052222	7.39155	https://www.genecards.org/cgi-bin/carddisp.pl?gene=TLR9
CTSB	Cathepsin B	Protein Coding	59	GC08M011842	7.35322	https://www.genecards.org/cgi-bin/carddisp.pl?gene=CTSB
RAC1	Rac Family Small GTPase 1	Protein Coding	55	GC07P006377	7.35088	https://www.genecards.org/cgi-bin/carddisp.pl?gene=RAC1
TFRC	Transferrin Receptor	Protein Coding	58	GC03M196056	7.32306	https://www.genecards.org/cgi-bin/carddisp.pl?gene=TFRC
CAT	Catalase	Protein Coding	58	GC11P034460	7.31417	https://www.genecards.org/cgi-bin/carddisp.pl?gene=CAT
CASP3	Caspase 3	Protein Coding	57	GC04M184627	7.3069	https://www.genecards.org/cgi-bin/carddisp.pl?gene=CASP3
CDKN1A	Cyclin Dependent Kinase Inhibitor 1A	Protein Coding	55	GC06P092294	7.30283	https://www.genecards.org/cgi-bin/carddisp.pl?gene=CDKN1A
CD40LG	CD40 Ligand	Protein Coding	57	GC0XP136649	7.29885	https://www.genecards.org/cgi-bin/carddisp.pl?gene=CD40LG
HRAS	HRas Proto-Oncogene, GTPase	Protein Coding	59	GC11M004421	7.28273	https://www.genecards.org/cgi-bin/carddisp.pl?gene=HRAS
TREM1	Triggering Receptor Expressed On Myeloid Cells 1	Protein Coding	48	GC06M041267	7.26803	https://www.genecards.org/cgi-bin/carddisp.pl?gene=TREM1
SOCS3	Suppressor Of Cytokine Signaling 3	Protein Coding	50	GC17M078356	7.24283	https://www.genecards.org/cgi-bin/carddisp.pl?gene=SOCS3
ALOX5	Arachidonate 5-Lipoxygenase	Protein Coding	54	GC10P045374	7.20697	https://www.genecards.org/cgi-bin/carddisp.pl?gene=ALOX5
ESR1	Estrogen Receptor 1	Protein Coding	61	GC06P151656	7.20399	https://www.genecards.org/cgi-bin/carddisp.pl?gene=ESR1
EMP1	Epithelial Membrane Protein 1	Protein Coding	43	GC12P013196	7.17754	https://www.genecards.org/cgi-bin/carddisp.pl?gene=EMP1
PLAUR	Plasminogen Activator, Urokinase Receptor	Protein Coding	52	GC19M043646	7.16532	https://www.genecards.org/cgi-bin/carddisp.pl?gene=PLAUR
PIK3R1	Phosphoinositide-3-Kinase Regulatory Subunit 1	Protein Coding	57	GC05P068215	7.16401	https://www.genecards.org/cgi-bin/carddisp.pl?gene=PIK3R1
CA9	Carbonic Anhydrase 9	Protein Coding	53	GC09P035673	7.15653	https://www.genecards.org/cgi-bin/carddisp.pl?gene=CA9
NOD2	Nucleotide Binding Oligomerization Domain Containing 2	Protein Coding	55	GC16P050693	7.12525	https://www.genecards.org/cgi-bin/carddisp.pl?gene=NOD2
FCGR3A	Fc Gamma Receptor IIIa	Protein Coding	53	GC01M161541	7.10661	https://www.genecards.org/cgi-bin/carddisp.pl?gene=FCGR3A
EGFR	Epidermal Growth Factor Receptor	Protein Coding	62	GC07P055019	7.08703	https://www.genecards.org/cgi-bin/carddisp.pl?gene=EGFR
AIF1	Allograft Inflammatory Factor 1	Protein Coding	45	GC06P092153	7.08511	https://www.genecards.org/cgi-bin/carddisp.pl?gene=AIF1
NFE2L2	NFE2 Like BZIP Transcription Factor 2	Protein Coding	57	GC02M177227	7.07099	https://www.genecards.org/cgi-bin/carddisp.pl?gene=NFE2L2
CCL19	C-C Motif Chemokine Ligand 19	Protein Coding	46	GC09M034711	6.97368	https://www.genecards.org/cgi-bin/carddisp.pl?gene=CCL19
IL23A	Interleukin 23 Subunit Alpha	Protein Coding	46	GC12P057557	6.96741	https://www.genecards.org/cgi-bin/carddisp.pl?gene=IL23A
ETS2	ETS Proto-Oncogene 2, Transcription Factor	Protein Coding	48	GC21P038805	6.95531	https://www.genecards.org/cgi-bin/carddisp.pl?gene=ETS2
CASP8	Caspase 8	Protein Coding	59	GC02P201233	6.9523	https://www.genecards.org/cgi-bin/carddisp.pl?gene=CASP8
CCL8	C-C Motif Chemokine Ligand 8	Protein Coding	46	GC17P034319	6.952	https://www.genecards.org/cgi-bin/carddisp.pl?gene=CCL8
PTEN	Phosphatase And Tensin Homolog	Protein Coding	59	GC10P094594	6.93645	https://www.genecards.org/cgi-bin/carddisp.pl?gene=PTEN
CEBPB	CCAAT Enhancer Binding Protein Beta	Protein Coding	50	GC20P050190	6.93412	https://www.genecards.org/cgi-bin/carddisp.pl?gene=CEBPB
STING1	Stimulator Of Interferon Response CGAMP Interactor 1	Protein Coding	48	GC05M139476	6.92773	https://www.genecards.org/cgi-bin/carddisp.pl?gene=STING1
STAT5A	Signal Transducer And Activator Of Transcription 5A	Protein Coding	55	GC17P042287	6.92119	https://www.genecards.org/cgi-bin/carddisp.pl?gene=STAT5A
SRC	SRC Proto-Oncogene, Non-Receptor Tyrosine Kinase	Protein Coding	58	GC20P037344	6.91901	https://www.genecards.org/cgi-bin/carddisp.pl?gene=SRC
KIT	KIT Proto-Oncogene, Receptor Tyrosine Kinase	Protein Coding	60	GC04P054657	6.88835	https://www.genecards.org/cgi-bin/carddisp.pl?gene=KIT
CDC42	Cell Division Cycle 42	Protein Coding	57	GC01P022052	6.88119	https://www.genecards.org/cgi-bin/carddisp.pl?gene=CDC42
VIM	Vimentin	Protein Coding	57	GC10P017227	6.85206	https://www.genecards.org/cgi-bin/carddisp.pl?gene=VIM
FOLR2	Folate Receptor Beta	Protein Coding	50	GC11P072216	6.8421	https://www.genecards.org/cgi-bin/carddisp.pl?gene=FOLR2
SMPD1	Sphingomyelin Phosphodiesterase 1	Protein Coding	56	GC11P006390	6.82305	https://www.genecards.org/cgi-bin/carddisp.pl?gene=SMPD1
ST14	ST14 Transmembrane Serine Protease Matriptase	Protein Coding	55	GC11P130159	6.81645	https://www.genecards.org/cgi-bin/carddisp.pl?gene=ST14
ZFP36	ZFP36 Ring Finger Protein	Protein Coding	44	GC19P039406	6.79835	https://www.genecards.org/cgi-bin/carddisp.pl?gene=ZFP36
OSM	Oncostatin M	Protein Coding	50	GC22M030262	6.78104	https://www.genecards.org/cgi-bin/carddisp.pl?gene=OSM
RUNX2	RUNX Family Transcription Factor 2	Protein Coding	53	GC06P092371	6.7657	https://www.genecards.org/cgi-bin/carddisp.pl?gene=RUNX2
MBL2	Mannose Binding Lectin 2	Protein Coding	53	GC10M052760	6.76534	https://www.genecards.org/cgi-bin/carddisp.pl?gene=MBL2
SP1	Sp1 Transcription Factor	Protein Coding	53	GC12P053380	6.73754	https://www.genecards.org/cgi-bin/carddisp.pl?gene=SP1
CCL17	C-C Motif Chemokine Ligand 17	Protein Coding	47	GC16P057416	6.72865	https://www.genecards.org/cgi-bin/carddisp.pl?gene=CCL17
VTCN1	V-Set Domain Containing T Cell Activation Inhibitor 1	Protein Coding	48	GC01M117143	6.7018	https://www.genecards.org/cgi-bin/carddisp.pl?gene=VTCN1
CSF3R	Colony Stimulating Factor 3 Receptor	Protein Coding	54	GC01M036466	6.70163	https://www.genecards.org/cgi-bin/carddisp.pl?gene=CSF3R
TGFA	Transforming Growth Factor Alpha	Protein Coding	53	GC02M070447	6.67958	https://www.genecards.org/cgi-bin/carddisp.pl?gene=TGFA
ACP5	Acid Phosphatase 5, Tartrate Resistant	Protein Coding	53	GC19M011574	6.67953	https://www.genecards.org/cgi-bin/carddisp.pl?gene=ACP5
PECAM1	Platelet And Endothelial Cell Adhesion Molecule 1	Protein Coding	47	GC17M064319	6.67671	https://www.genecards.org/cgi-bin/carddisp.pl?gene=PECAM1
CD83	CD83 Molecule	Protein Coding	47	GC06P014117	6.663	https://www.genecards.org/cgi-bin/carddisp.pl?gene=CD83
PTK2	Protein Tyrosine Kinase 2	Protein Coding	55	GC08M140657	6.63684	https://www.genecards.org/cgi-bin/carddisp.pl?gene=PTK2
TNFRSF1B	TNF Receptor Superfamily Member 1B	Protein Coding	56	GC01P012301	6.60999	https://www.genecards.org/cgi-bin/carddisp.pl?gene=TNFRSF1B
FCAR	Fc Alpha Receptor	Protein Coding	47	GC19P073506	6.59329	https://www.genecards.org/cgi-bin/carddisp.pl?gene=FCAR
FOXP1	Forkhead Box P1	Protein Coding	51	GC03M070954	6.57106	https://www.genecards.org/cgi-bin/carddisp.pl?gene=FOXP1
AHR	Aryl Hydrocarbon Receptor	Protein Coding	54	GC07P016916	6.55542	https://www.genecards.org/cgi-bin/carddisp.pl?gene=AHR
DCAF1	DDB1 And CUL4 Associated Factor 1	Protein Coding	44	GC03M051395	6.52771	https://www.genecards.org/cgi-bin/carddisp.pl?gene=DCAF1
PDCD1	Programmed Cell Death 1	Protein Coding	55	GC02M241849	6.51868	https://www.genecards.org/cgi-bin/carddisp.pl?gene=PDCD1
CXCR3	C-X-C Motif Chemokine Receptor 3	Protein Coding	51	GC0XM071615	6.51793	https://www.genecards.org/cgi-bin/carddisp.pl?gene=CXCR3
CLEC7A	C-Type Lectin Domain Containing 7A	Protein Coding	52	GC12M022628	6.50642	https://www.genecards.org/cgi-bin/carddisp.pl?gene=CLEC7A
ADA2	Adenosine Deaminase 2	Protein Coding	47	GC22M017214	6.48138	https://www.genecards.org/cgi-bin/carddisp.pl?gene=ADA2
RAF1	Raf-1 Proto-Oncogene, Serine/Threonine Kinase	Protein Coding	61	GC03M012583	6.47336	https://www.genecards.org/cgi-bin/carddisp.pl?gene=RAF1
MCL1	MCL1 Apoptosis Regulator, BCL2 Family Member	Protein Coding	55	GC01M152731	6.45802	https://www.genecards.org/cgi-bin/carddisp.pl?gene=MCL1
ITGAX	Integrin Subunit Alpha X	Protein Coding	53	GC16P042860	6.45063	https://www.genecards.org/cgi-bin/carddisp.pl?gene=ITGAX
EGF	Epidermal Growth Factor	Protein Coding	58	GC04P109912	6.4501	https://www.genecards.org/cgi-bin/carddisp.pl?gene=EGF
HUNK	Hormonally Up-Regulated Neu-Associated Kinase	Protein Coding	43	GC21P031873	6.42347	https://www.genecards.org/cgi-bin/carddisp.pl?gene=HUNK
NEU1	Neuraminidase 1	Protein Coding	52	GC06M031857	6.42032	https://www.genecards.org/cgi-bin/carddisp.pl?gene=NEU1
IL1R1	Interleukin 1 Receptor Type 1	Protein Coding	53	GC02P102136	6.41573	https://www.genecards.org/cgi-bin/carddisp.pl?gene=IL1R1
ITIH4	Inter-Alpha-Trypsin Inhibitor Heavy Chain 4	Protein Coding	50	GC03M052812	6.40949	https://www.genecards.org/cgi-bin/carddisp.pl?gene=ITIH4
SFTPA1	Surfactant Protein A1	Protein Coding	51	GC10P095475	6.40339	https://www.genecards.org/cgi-bin/carddisp.pl?gene=SFTPA1
ENOX2	Ecto-NOX Disulfide-Thiol Exchanger 2	Protein Coding	44	GC0XM130623	6.35105	https://www.genecards.org/cgi-bin/carddisp.pl?gene=ENOX2
SERPINE1	Serpin Family E Member 1	Protein Coding	57	GC07P101127	6.34994	https://www.genecards.org/cgi-bin/carddisp.pl?gene=SERPINE1
CTSL	Cathepsin L	Protein Coding	53	GC09P087725	6.34821	https://www.genecards.org/cgi-bin/carddisp.pl?gene=CTSL
NPM1	Nucleophosmin 1	Protein Coding	57	GC05P171387	6.34452	https://www.genecards.org/cgi-bin/carddisp.pl?gene=NPM1
ELN	Elastin	Protein Coding	50	GC07P074027	6.33675	https://www.genecards.org/cgi-bin/carddisp.pl?gene=ELN
KRAS	KRAS Proto-Oncogene, GTPase	Protein Coding	59	GC12M025204	6.32209	https://www.genecards.org/cgi-bin/carddisp.pl?gene=KRAS
ALOX15B	Arachidonate 15-Lipoxygenase Type B	Protein Coding	48	GC17P008039	6.32153	https://www.genecards.org/cgi-bin/carddisp.pl?gene=ALOX15B
PRKCZ	Protein Kinase C Zeta	Protein Coding	56	GC01P004411	6.31808	https://www.genecards.org/cgi-bin/carddisp.pl?gene=PRKCZ
CPM	Carboxypeptidase M	Protein Coding	49	GC12M068842	6.30906	https://www.genecards.org/cgi-bin/carddisp.pl?gene=CPM
IFNB1	Interferon Beta 1	Protein Coding	50	GC09M021077	6.29985	https://www.genecards.org/cgi-bin/carddisp.pl?gene=IFNB1
EPO	Erythropoietin	Protein Coding	49	GC07P100720	6.25967	https://www.genecards.org/cgi-bin/carddisp.pl?gene=EPO
FGF2	Fibroblast Growth Factor 2	Protein Coding	52	GC04P122826	6.25693	https://www.genecards.org/cgi-bin/carddisp.pl?gene=FGF2
CCL21	C-C Motif Chemokine Ligand 21	Protein Coding	48	GC09M034709	6.25495	https://www.genecards.org/cgi-bin/carddisp.pl?gene=CCL21
ANPEP	Alanyl Aminopeptidase, Membrane	Protein Coding	57	GC15M089784	6.25283	https://www.genecards.org/cgi-bin/carddisp.pl?gene=ANPEP
MYO5A	Myosin VA	Protein Coding	51	GC15M123722	6.23975	https://www.genecards.org/cgi-bin/carddisp.pl?gene=MYO5A
SERPINA1	Serpin Family A Member 1	Protein Coding	56	GC14M094376	6.22653	https://www.genecards.org/cgi-bin/carddisp.pl?gene=SERPINA1
FCGR2A	Fc Gamma Receptor IIa	Protein Coding	55	GC01P161505	6.22515	https://www.genecards.org/cgi-bin/carddisp.pl?gene=FCGR2A
MIR155	MicroRNA 155	RNA Gene	23	GC21P025573	6.22396	https://www.genecards.org/cgi-bin/carddisp.pl?gene=MIR155
PDGFRB	Platelet Derived Growth Factor Receptor Beta	Protein Coding	60	GC05M150113	6.19886	https://www.genecards.org/cgi-bin/carddisp.pl?gene=PDGFRB
TYK2	Tyrosine Kinase 2	Protein Coding	60	GC19M010350	6.19798	https://www.genecards.org/cgi-bin/carddisp.pl?gene=TYK2
IRF1	Interferon Regulatory Factor 1	Protein Coding	53	GC05M132440	6.18382	https://www.genecards.org/cgi-bin/carddisp.pl?gene=IRF1
NR3C1	Nuclear Receptor Subfamily 3 Group C Member 1	Protein Coding	56	GC05M143277	6.16612	https://www.genecards.org/cgi-bin/carddisp.pl?gene=NR3C1
IRAK1	Interleukin 1 Receptor Associated Kinase 1	Protein Coding	56	GC0XM154010	6.16202	https://www.genecards.org/cgi-bin/carddisp.pl?gene=IRAK1
HBEGF	Heparin Binding EGF Like Growth Factor	Protein Coding	50	GC05M140332	6.16024	https://www.genecards.org/cgi-bin/carddisp.pl?gene=HBEGF
GPNMB	Glycoprotein Nmb	Protein Coding	51	GC07P023238	6.15193	https://www.genecards.org/cgi-bin/carddisp.pl?gene=GPNMB
LILRB1	Leukocyte Immunoglobulin Like Receptor B1	Protein Coding	50	GC19P073495	6.14839	https://www.genecards.org/cgi-bin/carddisp.pl?gene=LILRB1
IL12A	Interleukin 12A	Protein Coding	51	GC03P159988	6.14048	https://www.genecards.org/cgi-bin/carddisp.pl?gene=IL12A
OLR1	Oxidized Low Density Lipoprotein Receptor 1	Protein Coding	50	GC12M022629	6.13198	https://www.genecards.org/cgi-bin/carddisp.pl?gene=OLR1
PF4	Platelet Factor 4	Protein Coding	47	GC04M073980	6.12003	https://www.genecards.org/cgi-bin/carddisp.pl?gene=PF4
GSN	Gelsolin	Protein Coding	56	GC09P121201	6.11808	https://www.genecards.org/cgi-bin/carddisp.pl?gene=GSN
PLA2G2A	Phospholipase A2 Group IIA	Protein Coding	53	GC01M019975	6.09637	https://www.genecards.org/cgi-bin/carddisp.pl?gene=PLA2G2A
TNC	Tenascin C	Protein Coding	56	GC09M115019	6.08607	https://www.genecards.org/cgi-bin/carddisp.pl?gene=TNC
LAMP1	Lysosomal Associated Membrane Protein 1	Protein Coding	50	GC13P113297	6.05219	https://www.genecards.org/cgi-bin/carddisp.pl?gene=LAMP1
NRAS	NRAS Proto-Oncogene, GTPase	Protein Coding	57	GC01M114704	6.0503	https://www.genecards.org/cgi-bin/carddisp.pl?gene=NRAS
HSPA4	Heat Shock Protein Family A (Hsp70) Member 4	Protein Coding	49	GC05P133054	6.03283	https://www.genecards.org/cgi-bin/carddisp.pl?gene=HSPA4
IRAK3	Interleukin 1 Receptor Associated Kinase 3	Protein Coding	53	GC12P066318	6.029	https://www.genecards.org/cgi-bin/carddisp.pl?gene=IRAK3
CLEC12A	C-Type Lectin Domain Family 12 Member A	Protein Coding	46	GC12P009951	6.02247	https://www.genecards.org/cgi-bin/carddisp.pl?gene=CLEC12A
IL2RB	Interleukin 2 Receptor Subunit Beta	Protein Coding	56	GC22M061459	6.02006	https://www.genecards.org/cgi-bin/carddisp.pl?gene=IL2RB
MERTK	MER Proto-Oncogene, Tyrosine Kinase	Protein Coding	59	GC02P111898	6.01771	https://www.genecards.org/cgi-bin/carddisp.pl?gene=MERTK
IL16	Interleukin 16	Protein Coding	48	GC15P081159	6.01174	https://www.genecards.org/cgi-bin/carddisp.pl?gene=IL16
TGFB2	Transforming Growth Factor Beta 2	Protein Coding	58	GC01P218345	6.00462	https://www.genecards.org/cgi-bin/carddisp.pl?gene=TGFB2
ALOX15	Arachidonate 15-Lipoxygenase	Protein Coding	52	GC17M004630	5.98166	https://www.genecards.org/cgi-bin/carddisp.pl?gene=ALOX15
EP300	E1A Binding Protein P300	Protein Coding	59	GC22P045272	5.97964	https://www.genecards.org/cgi-bin/carddisp.pl?gene=EP300
PIK3CA	Phosphatidylinositol-4,5-Bisphosphate 3-Kinase Catalytic Subunit Alpha	Protein Coding	59	GC03P179148	5.97947	https://www.genecards.org/cgi-bin/carddisp.pl?gene=PIK3CA
KDM6B	Lysine Demethylase 6B	Protein Coding	52	GC17P007834	5.97811	https://www.genecards.org/cgi-bin/carddisp.pl?gene=KDM6B
LGALS1	Galectin 1	Protein Coding	50	GC22P037675	5.97038	https://www.genecards.org/cgi-bin/carddisp.pl?gene=LGALS1
CEACAM5	CEA Cell Adhesion Molecule 5	Protein Coding	50	GC19P072938	5.96788	https://www.genecards.org/cgi-bin/carddisp.pl?gene=CEACAM5
HRG	Histidine Rich Glycoprotein	Protein Coding	52	GC03P186660	5.96452	https://www.genecards.org/cgi-bin/carddisp.pl?gene=HRG
CLEC4D	C-Type Lectin Domain Family 4 Member D	Protein Coding	44	GC12P008509	5.95899	https://www.genecards.org/cgi-bin/carddisp.pl?gene=CLEC4D
FCGR2B	Fc Gamma Receptor IIb	Protein Coding	56	GC01P161823	5.94912	https://www.genecards.org/cgi-bin/carddisp.pl?gene=FCGR2B
CX3CL1	C-X3-C Motif Chemokine Ligand 1	Protein Coding	52	GC16P057372	5.94903	https://www.genecards.org/cgi-bin/carddisp.pl?gene=CX3CL1
ANGPT1	Angiopoietin 1	Protein Coding	53	GC08M107246	5.94869	https://www.genecards.org/cgi-bin/carddisp.pl?gene=ANGPT1
TIMP1	TIMP Metallopeptidase Inhibitor 1	Protein Coding	52	GC0XP047711	5.94283	https://www.genecards.org/cgi-bin/carddisp.pl?gene=TIMP1
SELL	Selectin L	Protein Coding	50	GC01M169690	5.93576	https://www.genecards.org/cgi-bin/carddisp.pl?gene=SELL
IL3RA	Interleukin 3 Receptor Subunit Alpha	Protein Coding	51	GC0XP001336	5.91057	https://www.genecards.org/cgi-bin/carddisp.pl?gene=IL3RA
CXCL16	C-X-C Motif Chemokine Ligand 16	Protein Coding	46	GC17M004733	5.90576	https://www.genecards.org/cgi-bin/carddisp.pl?gene=CXCL16
TNFRSF11A	TNF Receptor Superfamily Member 11a	Protein Coding	54	GC18P062325	5.89038	https://www.genecards.org/cgi-bin/carddisp.pl?gene=TNFRSF11A
CLEC5A	C-Type Lectin Domain Containing 5A	Protein Coding	40	GC07M141927	5.88829	https://www.genecards.org/cgi-bin/carddisp.pl?gene=CLEC5A
WNT5A	Wnt Family Member 5A	Protein Coding	56	GC03M055465	5.88362	https://www.genecards.org/cgi-bin/carddisp.pl?gene=WNT5A
LEP	Leptin	Protein Coding	53	GC07P128241	5.88037	https://www.genecards.org/cgi-bin/carddisp.pl?gene=LEP
CREB1	CAMP Responsive Element Binding Protein 1	Protein Coding	56	GC02P207529	5.82855	https://www.genecards.org/cgi-bin/carddisp.pl?gene=CREB1
HLA-A	Major Histocompatibility Complex, Class I, A	Protein Coding	52	GC06P092113	5.82094	https://www.genecards.org/cgi-bin/carddisp.pl?gene=HLA-A
S100B	S100 Calcium Binding Protein B	Protein Coding	51	GC21M051379	5.80336	https://www.genecards.org/cgi-bin/carddisp.pl?gene=S100B
ITGB1	Integrin Subunit Beta 1	Protein Coding	57	GC10M033645	5.7959	https://www.genecards.org/cgi-bin/carddisp.pl?gene=ITGB1
MMP3	Matrix Metallopeptidase 3	Protein Coding	57	GC11M102835	5.79001	https://www.genecards.org/cgi-bin/carddisp.pl?gene=MMP3
ITGAV	Integrin Subunit Alpha V	Protein Coding	55	GC02P186589	5.76607	https://www.genecards.org/cgi-bin/carddisp.pl?gene=ITGAV
EPAS1	Endothelial PAS Domain Protein 1	Protein Coding	57	GC02P046293	5.76143	https://www.genecards.org/cgi-bin/carddisp.pl?gene=EPAS1
APC	APC Regulator Of WNT Signaling Pathway	Protein Coding	56	GC05P112707	5.75705	https://www.genecards.org/cgi-bin/carddisp.pl?gene=APC
NAMPT	Nicotinamide Phosphoribosyltransferase	Protein Coding	55	GC07M106248	5.75208	https://www.genecards.org/cgi-bin/carddisp.pl?gene=NAMPT
CTSD	Cathepsin D	Protein Coding	59	GC11M001752	5.74972	https://www.genecards.org/cgi-bin/carddisp.pl?gene=CTSD
CEACAM3	CEA Cell Adhesion Molecule 3	Protein Coding	49	GC19P041796	5.74733	https://www.genecards.org/cgi-bin/carddisp.pl?gene=CEACAM3
CD200	CD200 Molecule	Protein Coding	47	GC03P112332	5.73342	https://www.genecards.org/cgi-bin/carddisp.pl?gene=CD200
PLCB4	Phospholipase C Beta 4	Protein Coding	52	GC20P009024	5.72393	https://www.genecards.org/cgi-bin/carddisp.pl?gene=PLCB4
FLT3	Fms Related Receptor Tyrosine Kinase 3	Protein Coding	60	GC13M028003	5.72209	https://www.genecards.org/cgi-bin/carddisp.pl?gene=FLT3
EDN1	Endothelin 1	Protein Coding	55	GC06P012256	5.71439	https://www.genecards.org/cgi-bin/carddisp.pl?gene=EDN1
FABP4	Fatty Acid Binding Protein 4	Protein Coding	50	GC08M081478	5.70466	https://www.genecards.org/cgi-bin/carddisp.pl?gene=FABP4
IL18R1	Interleukin 18 Receptor 1	Protein Coding	50	GC02P102311	5.69921	https://www.genecards.org/cgi-bin/carddisp.pl?gene=IL18R1
LILRB2	Leukocyte Immunoglobulin Like Receptor B2	Protein Coding	46	GC19M071132	5.69431	https://www.genecards.org/cgi-bin/carddisp.pl?gene=LILRB2
VEGFC	Vascular Endothelial Growth Factor C	Protein Coding	53	GC04M176683	5.6943	https://www.genecards.org/cgi-bin/carddisp.pl?gene=VEGFC
CD247	CD247 Molecule	Protein Coding	56	GC01M167399	5.69109	https://www.genecards.org/cgi-bin/carddisp.pl?gene=CD247
IL11	Interleukin 11	Protein Coding	47	GC19M055364	5.6885	https://www.genecards.org/cgi-bin/carddisp.pl?gene=IL11
CD28	CD28 Molecule	Protein Coding	55	GC02P203706	5.6645	https://www.genecards.org/cgi-bin/carddisp.pl?gene=CD28
TGM2	Transglutaminase 2	Protein Coding	54	GC20M038127	5.65716	https://www.genecards.org/cgi-bin/carddisp.pl?gene=TGM2
CTSK	Cathepsin K	Protein Coding	57	GC01M152758	5.64949	https://www.genecards.org/cgi-bin/carddisp.pl?gene=CTSK
MET	MET Proto-Oncogene, Receptor Tyrosine Kinase	Protein Coding	61	GC07P116672	5.64655	https://www.genecards.org/cgi-bin/carddisp.pl?gene=MET
PTPN11	Protein Tyrosine Phosphatase Non-Receptor Type 11	Protein Coding	61	GC12P112418	5.64427	https://www.genecards.org/cgi-bin/carddisp.pl?gene=PTPN11
CCL26	C-C Motif Chemokine Ligand 26	Protein Coding	44	GC07M075769	5.61978	https://www.genecards.org/cgi-bin/carddisp.pl?gene=CCL26
CCR7	C-C Motif Chemokine Receptor 7	Protein Coding	51	GC17M051716	5.61703	https://www.genecards.org/cgi-bin/carddisp.pl?gene=CCR7
MMP14	Matrix Metallopeptidase 14	Protein Coding	57	GC14P034667	5.61562	https://www.genecards.org/cgi-bin/carddisp.pl?gene=MMP14
CXCL3	C-X-C Motif Chemokine Ligand 3	Protein Coding	45	GC04M074036	5.60708	https://www.genecards.org/cgi-bin/carddisp.pl?gene=CXCL3
EGR1	Early Growth Response 1	Protein Coding	52	GC05P138465	5.58498	https://www.genecards.org/cgi-bin/carddisp.pl?gene=EGR1
FTL	Ferritin Light Chain	Protein Coding	52	GC19P048965	5.58256	https://www.genecards.org/cgi-bin/carddisp.pl?gene=FTL
LGALS9	Galectin 9	Protein Coding	47	GC17P027629	5.58066	https://www.genecards.org/cgi-bin/carddisp.pl?gene=LGALS9
SIRT1	Sirtuin 1	Protein Coding	56	GC10P067884	5.56777	https://www.genecards.org/cgi-bin/carddisp.pl?gene=SIRT1
MUC5B	Mucin 5B, Oligomeric Mucus/Gel-Forming	Protein Coding	48	GC11P002133	5.5571	https://www.genecards.org/cgi-bin/carddisp.pl?gene=MUC5B
STAT6	Signal Transducer And Activator Of Transcription 6	Protein Coding	57	GC12M057095	5.53881	https://www.genecards.org/cgi-bin/carddisp.pl?gene=STAT6
RETN	Resistin	Protein Coding	49	GC19P007669	5.53538	https://www.genecards.org/cgi-bin/carddisp.pl?gene=RETN
C5AR1	Complement C5a Receptor 1	Protein Coding	51	GC19P047290	5.53242	https://www.genecards.org/cgi-bin/carddisp.pl?gene=C5AR1
IRF7	Interferon Regulatory Factor 7	Protein Coding	54	GC11M000612	5.52807	https://www.genecards.org/cgi-bin/carddisp.pl?gene=IRF7
IGF1	Insulin Like Growth Factor 1	Protein Coding	55	GC12M102395	5.52739	https://www.genecards.org/cgi-bin/carddisp.pl?gene=IGF1
PDGFB	Platelet Derived Growth Factor Subunit B	Protein Coding	58	GC22M062326	5.51869	https://www.genecards.org/cgi-bin/carddisp.pl?gene=PDGFB
CDH1	Cadherin 1	Protein Coding	56	GC16P068737	5.5148	https://www.genecards.org/cgi-bin/carddisp.pl?gene=CDH1
KLF4	KLF Transcription Factor 4	Protein Coding	52	GC09M107484	5.50154	https://www.genecards.org/cgi-bin/carddisp.pl?gene=KLF4
HLA-DRA	Major Histocompatibility Complex, Class II, DR Alpha	Protein Coding	51	GC06P032439	5.4929	https://www.genecards.org/cgi-bin/carddisp.pl?gene=HLA-DRA
GFI1	Growth Factor Independent 1 Transcriptional Repressor	Protein Coding	48	GC01M092474	5.4771	https://www.genecards.org/cgi-bin/carddisp.pl?gene=GFI1
IKBKB	Inhibitor Of Nuclear Factor Kappa B Kinase Subunit Beta	Protein Coding	61	GC08P042271	5.45986	https://www.genecards.org/cgi-bin/carddisp.pl?gene=IKBKB
MIR21	MicroRNA 21	RNA Gene	26	GC17P063092	5.4178	https://www.genecards.org/cgi-bin/carddisp.pl?gene=MIR21
ICAM3	Intercellular Adhesion Molecule 3	Protein Coding	50	GC19M010421	5.41386	https://www.genecards.org/cgi-bin/carddisp.pl?gene=ICAM3
C1orf35	Chromosome 1 Open Reading Frame 35	Protein Coding	38	GC01M228100	5.41002	https://www.genecards.org/cgi-bin/carddisp.pl?gene=C1orf35
PTPN6	Protein Tyrosine Phosphatase Non-Receptor Type 6	Protein Coding	56	GC12P023562	5.40904	https://www.genecards.org/cgi-bin/carddisp.pl?gene=PTPN6
PTPRC	Protein Tyrosine Phosphatase Receptor Type C	Protein Coding	59	GC01P198607	5.40623	https://www.genecards.org/cgi-bin/carddisp.pl?gene=PTPRC
ELAVL1	ELAV Like RNA Binding Protein 1	Protein Coding	47	GC19M007958	5.40573	https://www.genecards.org/cgi-bin/carddisp.pl?gene=ELAVL1
CD1A	CD1a Molecule	Protein Coding	47	GC01P158255	5.4047	https://www.genecards.org/cgi-bin/carddisp.pl?gene=CD1A
SREBF1	Sterol Regulatory Element Binding Transcription Factor 1	Protein Coding	53	GC17M017810	5.39219	https://www.genecards.org/cgi-bin/carddisp.pl?gene=SREBF1
GLB1	Galactosidase Beta 1	Protein Coding	55	GC03M032963	5.38871	https://www.genecards.org/cgi-bin/carddisp.pl?gene=GLB1
ITGA4	Integrin Subunit Alpha 4	Protein Coding	55	GC02P181456	5.37753	https://www.genecards.org/cgi-bin/carddisp.pl?gene=ITGA4
PLCG1	Phospholipase C Gamma 1	Protein Coding	53	GC20P041136	5.37535	https://www.genecards.org/cgi-bin/carddisp.pl?gene=PLCG1
PTGS1	Prostaglandin-Endoperoxide Synthase 1	Protein Coding	53	GC09P122370	5.364	https://www.genecards.org/cgi-bin/carddisp.pl?gene=PTGS1
FOLR1	Folate Receptor Alpha	Protein Coding	53	GC11P072190	5.36272	https://www.genecards.org/cgi-bin/carddisp.pl?gene=FOLR1
CD69	CD69 Molecule	Protein Coding	49	GC12M022623	5.35636	https://www.genecards.org/cgi-bin/carddisp.pl?gene=CD69
VHL	Von Hippel-Lindau Tumor Suppressor	Protein Coding	54	GC03P013681	5.35204	https://www.genecards.org/cgi-bin/carddisp.pl?gene=VHL
STAB1	Stabilin 1	Protein Coding	48	GC03P052495	5.33831	https://www.genecards.org/cgi-bin/carddisp.pl?gene=STAB1
HDAC9	Histone Deacetylase 9	Protein Coding	56	GC07P018086	5.31657	https://www.genecards.org/cgi-bin/carddisp.pl?gene=HDAC9
CD34	CD34 Molecule	Protein Coding	52	GC01M207880	5.31234	https://www.genecards.org/cgi-bin/carddisp.pl?gene=CD34
MTOR	Mechanistic Target Of Rapamycin Kinase	Protein Coding	62	GC01M011106	5.31226	https://www.genecards.org/cgi-bin/carddisp.pl?gene=MTOR
IL10RA	Interleukin 10 Receptor Subunit Alpha	Protein Coding	53	GC11P117987	5.31075	https://www.genecards.org/cgi-bin/carddisp.pl?gene=IL10RA
B2M	Beta-2-Microglobulin	Protein Coding	56	GC15P044711	5.29559	https://www.genecards.org/cgi-bin/carddisp.pl?gene=B2M
IL37	Interleukin 37	Protein Coding	46	GC02P123799	5.29547	https://www.genecards.org/cgi-bin/carddisp.pl?gene=IL37
PON1	Paraoxonase 1	Protein Coding	55	GC07M095297	5.28646	https://www.genecards.org/cgi-bin/carddisp.pl?gene=PON1
ANXA2	Annexin A2	Protein Coding	55	GC15M060347	5.27754	https://www.genecards.org/cgi-bin/carddisp.pl?gene=ANXA2
ACE2	Angiotensin Converting Enzyme 2	Protein Coding	56	GC0XM015494	5.27539	https://www.genecards.org/cgi-bin/carddisp.pl?gene=ACE2
CAMP	Cathelicidin Antimicrobial Peptide	Protein Coding	46	GC03P049961	5.25479	https://www.genecards.org/cgi-bin/carddisp.pl?gene=CAMP
HSPD1	Heat Shock Protein Family D (Hsp60) Member 1	Protein Coding	55	GC02M197486	5.24713	https://www.genecards.org/cgi-bin/carddisp.pl?gene=HSPD1
TNFSF10	TNF Superfamily Member 10	Protein Coding	51	GC03M172505	5.24207	https://www.genecards.org/cgi-bin/carddisp.pl?gene=TNFSF10
PIK3CB	Phosphatidylinositol-4,5-Bisphosphate 3-Kinase Catalytic Subunit Beta	Protein Coding	55	GC03M138652	5.22142	https://www.genecards.org/cgi-bin/carddisp.pl?gene=PIK3CB
TNFRSF11B	TNF Receptor Superfamily Member 11b	Protein Coding	54	GC08M118923	5.21833	https://www.genecards.org/cgi-bin/carddisp.pl?gene=TNFRSF11B
FCGR3B	Fc Gamma Receptor IIIb	Protein Coding	50	GC01M161623	5.21295	https://www.genecards.org/cgi-bin/carddisp.pl?gene=FCGR3B
ETS1	ETS Proto-Oncogene 1, Transcription Factor	Protein Coding	53	GC11M128458	5.21199	https://www.genecards.org/cgi-bin/carddisp.pl?gene=ETS1
PMEL	Premelanosome Protein	Protein Coding	49	GC12M055954	5.2073	https://www.genecards.org/cgi-bin/carddisp.pl?gene=PMEL
PLIN2	Perilipin 2	Protein Coding	48	GC09M019184	5.20144	https://www.genecards.org/cgi-bin/carddisp.pl?gene=PLIN2
AXL	AXL Receptor Tyrosine Kinase	Protein Coding	59	GC19P041219	5.20126	https://www.genecards.org/cgi-bin/carddisp.pl?gene=AXL
IL33	Interleukin 33	Protein Coding	46	GC09P007685	5.20079	https://www.genecards.org/cgi-bin/carddisp.pl?gene=IL33
TCF4	Transcription Factor 4	Protein Coding	54	GC18M055222	5.197	https://www.genecards.org/cgi-bin/carddisp.pl?gene=TCF4
TNFSF13B	TNF Superfamily Member 13b	Protein Coding	52	GC13P108251	5.19532	https://www.genecards.org/cgi-bin/carddisp.pl?gene=TNFSF13B
TWIST1	Twist Family BHLH Transcription Factor 1	Protein Coding	52	GC07M019020	5.19426	https://www.genecards.org/cgi-bin/carddisp.pl?gene=TWIST1
GZMB	Granzyme B	Protein Coding	54	GC14M024630	5.18603	https://www.genecards.org/cgi-bin/carddisp.pl?gene=GZMB
JAK1	Janus Kinase 1	Protein Coding	60	GC01M064833	5.18547	https://www.genecards.org/cgi-bin/carddisp.pl?gene=JAK1
CREBBP	CREB Binding Protein	Protein Coding	60	GC16M008258	5.18047	https://www.genecards.org/cgi-bin/carddisp.pl?gene=CREBBP
VSIG4	V-Set And Immunoglobulin Domain Containing 4	Protein Coding	44	GC0XM066021	5.17045	https://www.genecards.org/cgi-bin/carddisp.pl?gene=VSIG4
LRRC4	Leucine Rich Repeat Containing 4	Protein Coding	47	GC07M128027	5.16915	https://www.genecards.org/cgi-bin/carddisp.pl?gene=LRRC4
AGER	Advanced Glycosylation End-Product Specific Receptor	Protein Coding	53	GC06M032180	5.16816	https://www.genecards.org/cgi-bin/carddisp.pl?gene=AGER
LTF	Lactotransferrin	Protein Coding	52	GC03M046435	5.16712	https://www.genecards.org/cgi-bin/carddisp.pl?gene=LTF
IL32	Interleukin 32	Protein Coding	45	GC16P013549	5.15854	https://www.genecards.org/cgi-bin/carddisp.pl?gene=IL32
MARCKSL1	MARCKS Like 1	Protein Coding	43	GC01M032334	5.14794	https://www.genecards.org/cgi-bin/carddisp.pl?gene=MARCKSL1
SELE	Selectin E	Protein Coding	50	GC01M169722	5.14541	https://www.genecards.org/cgi-bin/carddisp.pl?gene=SELE
BSG	Basigin (Ok Blood Group)	Protein Coding	51	GC19P000571	5.13873	https://www.genecards.org/cgi-bin/carddisp.pl?gene=BSG
PRKCD	Protein Kinase C Delta	Protein Coding	59	GC03P053156	5.13865	https://www.genecards.org/cgi-bin/carddisp.pl?gene=PRKCD
CEBPD	CCAAT Enhancer Binding Protein Delta	Protein Coding	46	GC08M047759	5.13689	https://www.genecards.org/cgi-bin/carddisp.pl?gene=CEBPD
NCAM1	Neural Cell Adhesion Molecule 1	Protein Coding	55	GC11P112961	5.13351	https://www.genecards.org/cgi-bin/carddisp.pl?gene=NCAM1
SETD2	SET Domain Containing 2, Histone Lysine Methyltransferase	Protein Coding	53	GC03M047033	5.12933	https://www.genecards.org/cgi-bin/carddisp.pl?gene=SETD2
DMBT1	Deleted In Malignant Brain Tumors 1	Protein Coding	46	GC10P122560	5.12432	https://www.genecards.org/cgi-bin/carddisp.pl?gene=DMBT1
UBXN11	UBX Domain Protein 11	Protein Coding	43	GC01M026281	5.12357	https://www.genecards.org/cgi-bin/carddisp.pl?gene=UBXN11
STAT5B	Signal Transducer And Activator Of Transcription 5B	Protein Coding	56	GC17M042199	5.12308	https://www.genecards.org/cgi-bin/carddisp.pl?gene=STAT5B
RIPK1	Receptor Interacting Serine/Threonine Kinase 1	Protein Coding	56	GC06P003333	5.11878	https://www.genecards.org/cgi-bin/carddisp.pl?gene=RIPK1
TSC22D3	TSC22 Domain Family Member 3	Protein Coding	46	GC0XM107713	5.11592	https://www.genecards.org/cgi-bin/carddisp.pl?gene=TSC22D3
ADAM17	ADAM Metallopeptidase Domain 17	Protein Coding	58	GC02M009488	5.1156	https://www.genecards.org/cgi-bin/carddisp.pl?gene=ADAM17
CD200R1	CD200 Receptor 1	Protein Coding	46	GC03M112921	5.10509	https://www.genecards.org/cgi-bin/carddisp.pl?gene=CD200R1
TLR5	Toll Like Receptor 5	Protein Coding	53	GC01M223109	5.09272	https://www.genecards.org/cgi-bin/carddisp.pl?gene=TLR5
RUNX1	RUNX Family Transcription Factor 1	Protein Coding	56	GC21M034787	5.07758	https://www.genecards.org/cgi-bin/carddisp.pl?gene=RUNX1
MDK	Midkine	Protein Coding	50	GC11P046380	5.07516	https://www.genecards.org/cgi-bin/carddisp.pl?gene=MDK
RTN4	Reticulon 4	Protein Coding	52	GC02M054934	5.0741	https://www.genecards.org/cgi-bin/carddisp.pl?gene=RTN4
GAPDH	Glyceraldehyde-3-Phosphate Dehydrogenase	Protein Coding	57	GC12P023539	5.07147	https://www.genecards.org/cgi-bin/carddisp.pl?gene=GAPDH
CA12	Carbonic Anhydrase 12	Protein Coding	54	GC15M063321	5.04067	https://www.genecards.org/cgi-bin/carddisp.pl?gene=CA12
IL36RN	Interleukin 36 Receptor Antagonist	Protein Coding	50	GC02P123801	5.03861	https://www.genecards.org/cgi-bin/carddisp.pl?gene=IL36RN
FGL2	Fibrinogen Like 2	Protein Coding	47	GC07M077193	5.03812	https://www.genecards.org/cgi-bin/carddisp.pl?gene=FGL2
LTA	Lymphotoxin Alpha	Protein Coding	49	GC06P092152	5.02846	https://www.genecards.org/cgi-bin/carddisp.pl?gene=LTA
RARRES2	Retinoic Acid Receptor Responder 2	Protein Coding	46	GC07M150333	5.02516	https://www.genecards.org/cgi-bin/carddisp.pl?gene=RARRES2
CXCL14	C-X-C Motif Chemokine Ligand 14	Protein Coding	43	GC05M135617	5.00157	https://www.genecards.org/cgi-bin/carddisp.pl?gene=CXCL14
DUSP1	Dual Specificity Phosphatase 1	Protein Coding	52	GC05M172768	5.00011	https://www.genecards.org/cgi-bin/carddisp.pl?gene=DUSP1
NRP1	Neuropilin 1	Protein Coding	54	GC10M033177	4.9921	https://www.genecards.org/cgi-bin/carddisp.pl?gene=NRP1
TNFSF9	TNF Superfamily Member 9	Protein Coding	44	GC19P006531	4.96809	https://www.genecards.org/cgi-bin/carddisp.pl?gene=TNFSF9
IL27	Interleukin 27	Protein Coding	44	GC16M038243	4.96565	https://www.genecards.org/cgi-bin/carddisp.pl?gene=IL27
CALR	Calreticulin	Protein Coding	58	GC19P012938	4.96562	https://www.genecards.org/cgi-bin/carddisp.pl?gene=CALR
EIF3E	Eukaryotic Translation Initiation Factor 3 Subunit E	Protein Coding	46	GC08M108163	4.96547	https://www.genecards.org/cgi-bin/carddisp.pl?gene=EIF3E
PKM	Pyruvate Kinase M1/2	Protein Coding	56	GC15M072199	4.9585	https://www.genecards.org/cgi-bin/carddisp.pl?gene=PKM
AKT2	AKT Serine/Threonine Kinase 2	Protein Coding	61	GC19M040230	4.95833	https://www.genecards.org/cgi-bin/carddisp.pl?gene=AKT2
CD58	CD58 Molecule	Protein Coding	47	GC01M116514	4.94598	https://www.genecards.org/cgi-bin/carddisp.pl?gene=CD58
PTX3	Pentraxin 3	Protein Coding	50	GC03P157436	4.9373	https://www.genecards.org/cgi-bin/carddisp.pl?gene=PTX3
CBL	Cbl Proto-Oncogene	Protein Coding	59	GC11P119206	4.92446	https://www.genecards.org/cgi-bin/carddisp.pl?gene=CBL
CYCS	Cytochrome C, Somatic	Protein Coding	55	GC07M025118	4.90454	https://www.genecards.org/cgi-bin/carddisp.pl?gene=CYCS
ANXA1	Annexin A1	Protein Coding	54	GC09P073151	4.89904	https://www.genecards.org/cgi-bin/carddisp.pl?gene=ANXA1
ANGPT2	Angiopoietin 2	Protein Coding	55	GC08M006499	4.89877	https://www.genecards.org/cgi-bin/carddisp.pl?gene=ANGPT2
KDR	Kinase Insert Domain Receptor	Protein Coding	60	GC04M055078	4.89383	https://www.genecards.org/cgi-bin/carddisp.pl?gene=KDR
CXCR6	C-X-C Motif Chemokine Receptor 6	Protein Coding	47	GC03P047605	4.89081	https://www.genecards.org/cgi-bin/carddisp.pl?gene=CXCR6
CYP19A1	Cytochrome P450 Family 19 Subfamily A Member 1	Protein Coding	55	GC15M051208	4.88312	https://www.genecards.org/cgi-bin/carddisp.pl?gene=CYP19A1
TIMP3	TIMP Metallopeptidase Inhibitor 3	Protein Coding	50	GC22P044970	4.88109	https://www.genecards.org/cgi-bin/carddisp.pl?gene=TIMP3
CXCL5	C-X-C Motif Chemokine Ligand 5	Protein Coding	47	GC04M073995	4.87943	https://www.genecards.org/cgi-bin/carddisp.pl?gene=CXCL5
BCL6	BCL6 Transcription Repressor	Protein Coding	52	GC03M187721	4.86853	https://www.genecards.org/cgi-bin/carddisp.pl?gene=BCL6
IKBKG	Inhibitor Of Nuclear Factor Kappa B Kinase Regulatory Subunit Gamma	Protein Coding	55	GC0XP154541	4.86506	https://www.genecards.org/cgi-bin/carddisp.pl?gene=IKBKG
PXN	Paxillin	Protein Coding	52	GC12M120210	4.85479	https://www.genecards.org/cgi-bin/carddisp.pl?gene=PXN
TMPRSS3	Transmembrane Serine Protease 3	Protein Coding	48	GC21M042371	4.85443	https://www.genecards.org/cgi-bin/carddisp.pl?gene=TMPRSS3
CXCL13	C-X-C Motif Chemokine Ligand 13	Protein Coding	47	GC04P077511	4.84526	https://www.genecards.org/cgi-bin/carddisp.pl?gene=CXCL13
CAV1	Caveolin 1	Protein Coding	55	GC07P116524	4.84486	https://www.genecards.org/cgi-bin/carddisp.pl?gene=CAV1
CKAP2	Cytoskeleton Associated Protein 2	Protein Coding	43	GC13P052455	4.84481	https://www.genecards.org/cgi-bin/carddisp.pl?gene=CKAP2
FOXO3	Forkhead Box O3	Protein Coding	53	GC06P108559	4.84396	https://www.genecards.org/cgi-bin/carddisp.pl?gene=FOXO3
CD63	CD63 Molecule	Protein Coding	50	GC12M055725	4.84244	https://www.genecards.org/cgi-bin/carddisp.pl?gene=CD63
TNFSF13	TNF Superfamily Member 13	Protein Coding	52	GC17P007558	4.83122	https://www.genecards.org/cgi-bin/carddisp.pl?gene=TNFSF13
PTGER4	Prostaglandin E Receptor 4	Protein Coding	52	GC05P040679	4.83055	https://www.genecards.org/cgi-bin/carddisp.pl?gene=PTGER4
PDGFA	Platelet Derived Growth Factor Subunit A	Protein Coding	50	GC07M000497	4.82888	https://www.genecards.org/cgi-bin/carddisp.pl?gene=PDGFA
SOD2	Superoxide Dismutase 2	Protein Coding	53	GC06M159669	4.82604	https://www.genecards.org/cgi-bin/carddisp.pl?gene=SOD2
HDAC1	Histone Deacetylase 1	Protein Coding	57	GC01P032292	4.82519	https://www.genecards.org/cgi-bin/carddisp.pl?gene=HDAC1
LILRB4	Leukocyte Immunoglobulin Like Receptor B4	Protein Coding	44	GC19P054643	4.81901	https://www.genecards.org/cgi-bin/carddisp.pl?gene=LILRB4
PMEPA1	Prostate Transmembrane Protein, Androgen Induced 1	Protein Coding	45	GC20M057648	4.8096	https://www.genecards.org/cgi-bin/carddisp.pl?gene=PMEPA1
SKAP2	Src Kinase Associated Phosphoprotein 2	Protein Coding	46	GC07M026654	4.80697	https://www.genecards.org/cgi-bin/carddisp.pl?gene=SKAP2
TSPAN8	Tetraspanin 8	Protein Coding	47	GC12M071125	4.80564	https://www.genecards.org/cgi-bin/carddisp.pl?gene=TSPAN8
FOXP3	Forkhead Box P3	Protein Coding	53	GC0XM049250	4.80422	https://www.genecards.org/cgi-bin/carddisp.pl?gene=FOXP3
RB1	RB Transcriptional Corepressor 1	Protein Coding	55	GC13P048303	4.80199	https://www.genecards.org/cgi-bin/carddisp.pl?gene=RB1
FLT3LG	Fms Related Receptor Tyrosine Kinase 3 Ligand	Protein Coding	46	GC19P073231	4.80042	https://www.genecards.org/cgi-bin/carddisp.pl?gene=FLT3LG
JAG1	Jagged Canonical Notch Ligand 1	Protein Coding	58	GC20M010637	4.79762	https://www.genecards.org/cgi-bin/carddisp.pl?gene=JAG1
JMJD6	Jumonji Domain Containing 6, Arginine Demethylase And Lysine Hydroxylase	Protein Coding	49	GC17M076718	4.78935	https://www.genecards.org/cgi-bin/carddisp.pl?gene=JMJD6
TM4SF1	Transmembrane 4 L Six Family Member 1	Protein Coding	43	GC03M149370	4.78489	https://www.genecards.org/cgi-bin/carddisp.pl?gene=TM4SF1
CXCL11	C-X-C Motif Chemokine Ligand 11	Protein Coding	48	GC04M076033	4.77959	https://www.genecards.org/cgi-bin/carddisp.pl?gene=CXCL11
YAP1	Yes1 Associated Transcriptional Regulator	Protein Coding	55	GC11P102110	4.77528	https://www.genecards.org/cgi-bin/carddisp.pl?gene=YAP1
IL6R	Interleukin 6 Receptor	Protein Coding	57	GC01P154405	4.77514	https://www.genecards.org/cgi-bin/carddisp.pl?gene=IL6R
INPPL1	Inositol Polyphosphate Phosphatase Like 1	Protein Coding	55	GC11P072223	4.7733	https://www.genecards.org/cgi-bin/carddisp.pl?gene=INPPL1
FYN	FYN Proto-Oncogene, Src Family Tyrosine Kinase	Protein Coding	53	GC06M111660	4.7691	https://www.genecards.org/cgi-bin/carddisp.pl?gene=FYN
AKT3	AKT Serine/Threonine Kinase 3	Protein Coding	61	GC01M243488	4.76768	https://www.genecards.org/cgi-bin/carddisp.pl?gene=AKT3
RHOA	Ras Homolog Family Member A	Protein Coding	57	GC03M049359	4.76065	https://www.genecards.org/cgi-bin/carddisp.pl?gene=RHOA
INHBA	Inhibin Subunit Beta A	Protein Coding	51	GC07M041670	4.75564	https://www.genecards.org/cgi-bin/carddisp.pl?gene=INHBA
KLF6	KLF Transcription Factor 6	Protein Coding	50	GC10M003779	4.73618	https://www.genecards.org/cgi-bin/carddisp.pl?gene=KLF6
PRL	Prolactin	Protein Coding	50	GC06M022287	4.72971	https://www.genecards.org/cgi-bin/carddisp.pl?gene=PRL
MUC16	Mucin 16, Cell Surface Associated	Protein Coding	44	GC19M008848	4.72854	https://www.genecards.org/cgi-bin/carddisp.pl?gene=MUC16
SERPINB2	Serpin Family B Member 2	Protein Coding	50	GC18P063871	4.72366	https://www.genecards.org/cgi-bin/carddisp.pl?gene=SERPINB2
MSN	Moesin	Protein Coding	55	GC0XP065588	4.69664	https://www.genecards.org/cgi-bin/carddisp.pl?gene=MSN
PARP1	Poly(ADP-Ribose) Polymerase 1	Protein Coding	58	GC01M226360	4.69282	https://www.genecards.org/cgi-bin/carddisp.pl?gene=PARP1
TNFRSF6B	TNF Receptor Superfamily Member 6b	Protein Coding	48	GC20P063696	4.67795	https://www.genecards.org/cgi-bin/carddisp.pl?gene=TNFRSF6B
LYVE1	Lymphatic Vessel Endothelial Hyaluronan Receptor 1	Protein Coding	49	GC11M011131	4.67398	https://www.genecards.org/cgi-bin/carddisp.pl?gene=LYVE1
CTSS	Cathepsin S	Protein Coding	52	GC01M150730	4.66629	https://www.genecards.org/cgi-bin/carddisp.pl?gene=CTSS
CPQ	Carboxypeptidase Q	Protein Coding	44	GC08P096645	4.66242	https://www.genecards.org/cgi-bin/carddisp.pl?gene=CPQ
ADORA2A	Adenosine A2a Receptor	Protein Coding	53	GC22P024417	4.66182	https://www.genecards.org/cgi-bin/carddisp.pl?gene=ADORA2A
AIM2	Absent In Melanoma 2	Protein Coding	48	GC01M159062	4.66134	https://www.genecards.org/cgi-bin/carddisp.pl?gene=AIM2
AEBP1	AE Binding Protein 1	Protein Coding	48	GC07P044106	4.65729	https://www.genecards.org/cgi-bin/carddisp.pl?gene=AEBP1
TF	Transferrin	Protein Coding	57	GC03P135056	4.64307	https://www.genecards.org/cgi-bin/carddisp.pl?gene=TF
BIRC5	Baculoviral IAP Repeat Containing 5	Protein Coding	52	GC17P078214	4.62896	https://www.genecards.org/cgi-bin/carddisp.pl?gene=BIRC5
SERPINA3	Serpin Family A Member 3	Protein Coding	50	GC14P094612	4.62265	https://www.genecards.org/cgi-bin/carddisp.pl?gene=SERPINA3
SIGLEC15	Sialic Acid Binding Ig Like Lectin 15	Protein Coding	44	GC18P045825	4.62187	https://www.genecards.org/cgi-bin/carddisp.pl?gene=SIGLEC15
HLA-B	Major Histocompatibility Complex, Class I, B	Protein Coding	52	GC06M071682	4.61889	https://www.genecards.org/cgi-bin/carddisp.pl?gene=HLA-B
ERBB2	Erb-B2 Receptor Tyrosine Kinase 2	Protein Coding	62	GC17P039687	4.61877	https://www.genecards.org/cgi-bin/carddisp.pl?gene=ERBB2
TXN	Thioredoxin	Protein Coding	52	GC09M110243	4.61766	https://www.genecards.org/cgi-bin/carddisp.pl?gene=TXN
SPARC	Secreted Protein Acidic And Cysteine Rich	Protein Coding	56	GC05M151661	4.61716	https://www.genecards.org/cgi-bin/carddisp.pl?gene=SPARC
SIN3A	SIN3 Transcription Regulator Family Member A	Protein Coding	52	GC15M075369	4.61246	https://www.genecards.org/cgi-bin/carddisp.pl?gene=SIN3A
FOXO1	Forkhead Box O1	Protein Coding	56	GC13M040555	4.60976	https://www.genecards.org/cgi-bin/carddisp.pl?gene=FOXO1
RNASE3	Ribonuclease A Family Member 3	Protein Coding	46	GC14P020891	4.60111	https://www.genecards.org/cgi-bin/carddisp.pl?gene=RNASE3
TGFBR2	Transforming Growth Factor Beta Receptor 2	Protein Coding	59	GC03P030623	4.59973	https://www.genecards.org/cgi-bin/carddisp.pl?gene=TGFBR2
TPT1	Tumor Protein, Translationally-Controlled 1	Protein Coding	53	GC13M045333	4.59228	https://www.genecards.org/cgi-bin/carddisp.pl?gene=TPT1
HSP90AA1	Heat Shock Protein 90 Alpha Family Class A Member 1	Protein Coding	57	GC14M102080	4.59167	https://www.genecards.org/cgi-bin/carddisp.pl?gene=HSP90AA1
IL2RG	Interleukin 2 Receptor Subunit Gamma	Protein Coding	55	GC0XM071108	4.59112	https://www.genecards.org/cgi-bin/carddisp.pl?gene=IL2RG
CD180	CD180 Molecule	Protein Coding	48	GC05M067181	4.57713	https://www.genecards.org/cgi-bin/carddisp.pl?gene=CD180
WT1	WT1 Transcription Factor	Protein Coding	55	GC11M032365	4.56274	https://www.genecards.org/cgi-bin/carddisp.pl?gene=WT1
FAM32A	Family With Sequence Similarity 32 Member A	Protein Coding	39	GC19P072383	4.5626	https://www.genecards.org/cgi-bin/carddisp.pl?gene=FAM32A
GSK3B	Glycogen Synthase Kinase 3 Beta	Protein Coding	57	GC03M119821	4.54522	https://www.genecards.org/cgi-bin/carddisp.pl?gene=GSK3B
CDK6	Cyclin Dependent Kinase 6	Protein Coding	59	GC07M092604	4.54398	https://www.genecards.org/cgi-bin/carddisp.pl?gene=CDK6
M6PR	Mannose-6-Phosphate Receptor, Cation Dependent	Protein Coding	50	GC12M009029	4.54039	https://www.genecards.org/cgi-bin/carddisp.pl?gene=M6PR
CD276	CD276 Molecule	Protein Coding	49	GC15P073683	4.53943	https://www.genecards.org/cgi-bin/carddisp.pl?gene=CD276
MMP7	Matrix Metallopeptidase 7	Protein Coding	53	GC11M102425	4.53519	https://www.genecards.org/cgi-bin/carddisp.pl?gene=MMP7
IKZF1	IKAROS Family Zinc Finger 1	Protein Coding	56	GC07P050303	4.53137	https://www.genecards.org/cgi-bin/carddisp.pl?gene=IKZF1
CASP9	Caspase 9	Protein Coding	53	GC01M015491	4.52204	https://www.genecards.org/cgi-bin/carddisp.pl?gene=CASP9
ADA	Adenosine Deaminase	Protein Coding	57	GC20M044620	4.51822	https://www.genecards.org/cgi-bin/carddisp.pl?gene=ADA
EZH2	Enhancer Of Zeste 2 Polycomb Repressive Complex 2 Subunit	Protein Coding	60	GC07M148807	4.51472	https://www.genecards.org/cgi-bin/carddisp.pl?gene=EZH2
ITGB3	Integrin Subunit Beta 3	Protein Coding	59	GC17P062247	4.50924	https://www.genecards.org/cgi-bin/carddisp.pl?gene=ITGB3
NR4A3	Nuclear Receptor Subfamily 4 Group A Member 3	Protein Coding	49	GC09P099821	4.5062	https://www.genecards.org/cgi-bin/carddisp.pl?gene=NR4A3
DPP4	Dipeptidyl Peptidase 4	Protein Coding	57	GC02M161992	4.49876	https://www.genecards.org/cgi-bin/carddisp.pl?gene=DPP4
IDH1	Isocitrate Dehydrogenase (NADP(+)) 1	Protein Coding	60	GC02M208236	4.45518	https://www.genecards.org/cgi-bin/carddisp.pl?gene=IDH1
MIR146A	MicroRNA 146a	RNA Gene	25	GC05P160485	4.45436	https://www.genecards.org/cgi-bin/carddisp.pl?gene=MIR146A
NOTCH1	Notch Receptor 1	Protein Coding	60	GC09M137729	4.45316	https://www.genecards.org/cgi-bin/carddisp.pl?gene=NOTCH1
IGF1R	Insulin Like Growth Factor 1 Receptor	Protein Coding	61	GC15P098648	4.45238	https://www.genecards.org/cgi-bin/carddisp.pl?gene=IGF1R
MIR223	MicroRNA 223	RNA Gene	25	GC0XP066018	4.4465	https://www.genecards.org/cgi-bin/carddisp.pl?gene=MIR223
HP	Haptoglobin	Protein Coding	52	GC16P072372	4.44089	https://www.genecards.org/cgi-bin/carddisp.pl?gene=HP
MICB	MHC Class I Polypeptide-Related Sequence B	Protein Coding	47	GC06P092149	4.43647	https://www.genecards.org/cgi-bin/carddisp.pl?gene=MICB
MYB	MYB Proto-Oncogene, Transcription Factor	Protein Coding	55	GC06P135180	4.43223	https://www.genecards.org/cgi-bin/carddisp.pl?gene=MYB
RGCC	Regulator Of Cell Cycle	Protein Coding	41	GC13P041457	4.41568	https://www.genecards.org/cgi-bin/carddisp.pl?gene=RGCC
TRAF3	TNF Receptor Associated Factor 3	Protein Coding	53	GC14P110622	4.40857	https://www.genecards.org/cgi-bin/carddisp.pl?gene=TRAF3
TYMP	Thymidine Phosphorylase	Protein Coding	54	GC22M050525	4.40084	https://www.genecards.org/cgi-bin/carddisp.pl?gene=TYMP
ZEB1	Zinc Finger E-Box Binding Homeobox 1	Protein Coding	56	GC10P031318	4.39219	https://www.genecards.org/cgi-bin/carddisp.pl?gene=ZEB1
AR	Androgen Receptor	Protein Coding	59	GC0XP067544	4.38856	https://www.genecards.org/cgi-bin/carddisp.pl?gene=AR
MDM2	MDM2 Proto-Oncogene	Protein Coding	59	GC12P068808	4.38733	https://www.genecards.org/cgi-bin/carddisp.pl?gene=MDM2
HMGA2	High Mobility Group AT-Hook 2	Protein Coding	50	GC12P065824	4.38478	https://www.genecards.org/cgi-bin/carddisp.pl?gene=HMGA2
TGIF1	TGFB Induced Factor Homeobox 1	Protein Coding	53	GC18P003411	4.38189	https://www.genecards.org/cgi-bin/carddisp.pl?gene=TGIF1
RXRA	Retinoid X Receptor Alpha	Protein Coding	56	GC09P134317	4.37139	https://www.genecards.org/cgi-bin/carddisp.pl?gene=RXRA
HDAC2	Histone Deacetylase 2	Protein Coding	59	GC06M113933	4.36249	https://www.genecards.org/cgi-bin/carddisp.pl?gene=HDAC2
VIP	Vasoactive Intestinal Peptide	Protein Coding	51	GC06P152750	4.35693	https://www.genecards.org/cgi-bin/carddisp.pl?gene=VIP
ACE	Angiotensin I Converting Enzyme	Protein Coding	59	GC17P063477	4.35565	https://www.genecards.org/cgi-bin/carddisp.pl?gene=ACE
APOC1	Apolipoprotein C1	Protein Coding	46	GC19P044914	4.35132	https://www.genecards.org/cgi-bin/carddisp.pl?gene=APOC1
CCL14	C-C Motif Chemokine Ligand 14	Protein Coding	42	GC17M051428	4.34951	https://www.genecards.org/cgi-bin/carddisp.pl?gene=CCL14
LMNA	Lamin A/C	Protein Coding	56	GC01P156082	4.33269	https://www.genecards.org/cgi-bin/carddisp.pl?gene=LMNA
BCL2L1	BCL2 Like 1	Protein Coding	55	GC20M031664	4.30805	https://www.genecards.org/cgi-bin/carddisp.pl?gene=BCL2L1
NF2	NF2, Moesin-Ezrin-Radixin Like (MERLIN) Tumor Suppressor	Protein Coding	55	GC22P029603	4.30338	https://www.genecards.org/cgi-bin/carddisp.pl?gene=NF2
MALAT1	Metastasis Associated Lung Adenocarcinoma Transcript 1	RNA Gene	27	GC11P070867	4.28542	https://www.genecards.org/cgi-bin/carddisp.pl?gene=MALAT1
SMAD7	SMAD Family Member 7	Protein Coding	51	GC18M048919	4.28296	https://www.genecards.org/cgi-bin/carddisp.pl?gene=SMAD7
F2RL1	F2R Like Trypsin Receptor 1	Protein Coding	51	GC05P076818	4.28277	https://www.genecards.org/cgi-bin/carddisp.pl?gene=F2RL1
MITF	Melanocyte Inducing Transcription Factor	Protein Coding	55	GC03P069788	4.2778	https://www.genecards.org/cgi-bin/carddisp.pl?gene=MITF
HMGCR	3-Hydroxy-3-Methylglutaryl-CoA Reductase	Protein Coding	53	GC05P075336	4.27664	https://www.genecards.org/cgi-bin/carddisp.pl?gene=HMGCR
ALB	Albumin	Protein Coding	56	GC04P073397	4.26943	https://www.genecards.org/cgi-bin/carddisp.pl?gene=ALB
MICA	MHC Class I Polypeptide-Related Sequence A	Protein Coding	46	GC06P031399	4.2686	https://www.genecards.org/cgi-bin/carddisp.pl?gene=MICA
AIMP1	Aminoacyl TRNA Synthetase Complex Interacting Multifunctional Protein 1	Protein Coding	53	GC04P106315	4.26254	https://www.genecards.org/cgi-bin/carddisp.pl?gene=AIMP1
GAS5	Growth Arrest Specific 5	RNA Gene	26	GC01M173947	4.25825	https://www.genecards.org/cgi-bin/carddisp.pl?gene=GAS5
ACKR3	Atypical Chemokine Receptor 3	Protein Coding	49	GC02P236537	4.25538	https://www.genecards.org/cgi-bin/carddisp.pl?gene=ACKR3
LAMP2	Lysosomal Associated Membrane Protein 2	Protein Coding	51	GC0XM120426	4.2542	https://www.genecards.org/cgi-bin/carddisp.pl?gene=LAMP2
IL21	Interleukin 21	Protein Coding	51	GC04M122612	4.24883	https://www.genecards.org/cgi-bin/carddisp.pl?gene=IL21
SMAD2	SMAD Family Member 2	Protein Coding	59	GC18M047809	4.24345	https://www.genecards.org/cgi-bin/carddisp.pl?gene=SMAD2
TBK1	TANK Binding Kinase 1	Protein Coding	56	GC12P064451	4.24325	https://www.genecards.org/cgi-bin/carddisp.pl?gene=TBK1
BACH1	BTB Domain And CNC Homolog 1	Protein Coding	48	GC21P029194	4.2424	https://www.genecards.org/cgi-bin/carddisp.pl?gene=BACH1
FUS	FUS RNA Binding Protein	Protein Coding	51	GC16P031180	4.23301	https://www.genecards.org/cgi-bin/carddisp.pl?gene=FUS
IFNA2	Interferon Alpha 2	Protein Coding	50	GC09M021384	4.23212	https://www.genecards.org/cgi-bin/carddisp.pl?gene=IFNA2
SPDEF	SAM Pointed Domain Containing ETS Transcription Factor	Protein Coding	46	GC06M071854	4.23041	https://www.genecards.org/cgi-bin/carddisp.pl?gene=SPDEF
JAK3	Janus Kinase 3	Protein Coding	58	GC19M017824	4.22666	https://www.genecards.org/cgi-bin/carddisp.pl?gene=JAK3
FBXW7	F-Box And WD Repeat Domain Containing 7	Protein Coding	51	GC04M152321	4.22642	https://www.genecards.org/cgi-bin/carddisp.pl?gene=FBXW7
CYLD	CYLD Lysine 63 Deubiquitinase	Protein Coding	55	GC16P050742	4.22324	https://www.genecards.org/cgi-bin/carddisp.pl?gene=CYLD
EPOR	Erythropoietin Receptor	Protein Coding	56	GC19M011377	4.22118	https://www.genecards.org/cgi-bin/carddisp.pl?gene=EPOR
PGF	Placental Growth Factor	Protein Coding	50	GC14M074941	4.22025	https://www.genecards.org/cgi-bin/carddisp.pl?gene=PGF
CHGA	Chromogranin A	Protein Coding	50	GC14P092950	4.21823	https://www.genecards.org/cgi-bin/carddisp.pl?gene=CHGA
IL23R	Interleukin 23 Receptor	Protein Coding	52	GC01P067138	4.21525	https://www.genecards.org/cgi-bin/carddisp.pl?gene=IL23R
PIKFYVE	Phosphoinositide Kinase, FYVE-Type Zinc Finger Containing	Protein Coding	55	GC02P208266	4.21232	https://www.genecards.org/cgi-bin/carddisp.pl?gene=PIKFYVE
BRCA2	BRCA2 DNA Repair Associated	Protein Coding	53	GC13P032315	4.2114	https://www.genecards.org/cgi-bin/carddisp.pl?gene=BRCA2
SNCA	Synuclein Alpha	Protein Coding	59	GC04M089724	4.20818	https://www.genecards.org/cgi-bin/carddisp.pl?gene=SNCA
CDK4	Cyclin Dependent Kinase 4	Protein Coding	61	GC12M057787	4.19786	https://www.genecards.org/cgi-bin/carddisp.pl?gene=CDK4
SGK1	Serum/Glucocorticoid Regulated Kinase 1	Protein Coding	56	GC06M134169	4.1932	https://www.genecards.org/cgi-bin/carddisp.pl?gene=SGK1
BCAP31	B Cell Receptor Associated Protein 31	Protein Coding	48	GC0XM153701	4.18977	https://www.genecards.org/cgi-bin/carddisp.pl?gene=BCAP31
ILF3	Interleukin Enhancer Binding Factor 3	Protein Coding	44	GC19P010756	4.18862	https://www.genecards.org/cgi-bin/carddisp.pl?gene=ILF3
CLEC4A	C-Type Lectin Domain Family 4 Member A	Protein Coding	46	GC12P023589	4.1766	https://www.genecards.org/cgi-bin/carddisp.pl?gene=CLEC4A
XCL1	X-C Motif Chemokine Ligand 1	Protein Coding	44	GC01P168576	4.16176	https://www.genecards.org/cgi-bin/carddisp.pl?gene=XCL1
TFEB	Transcription Factor EB	Protein Coding	48	GC06M071932	4.14564	https://www.genecards.org/cgi-bin/carddisp.pl?gene=TFEB
CALM1	Calmodulin 1	Protein Coding	52	GC14P090396	4.14358	https://www.genecards.org/cgi-bin/carddisp.pl?gene=CALM1
GATA3	GATA Binding Protein 3	Protein Coding	56	GC10P008045	4.1429	https://www.genecards.org/cgi-bin/carddisp.pl?gene=GATA3
PDGFRA	Platelet Derived Growth Factor Receptor Alpha	Protein Coding	60	GC04P054229	4.13566	https://www.genecards.org/cgi-bin/carddisp.pl?gene=PDGFRA
MAP3K7	Mitogen-Activated Protein Kinase Kinase Kinase 7	Protein Coding	57	GC06M090513	4.1306	https://www.genecards.org/cgi-bin/carddisp.pl?gene=MAP3K7
ANXA5	Annexin A5	Protein Coding	52	GC04M121667	4.12345	https://www.genecards.org/cgi-bin/carddisp.pl?gene=ANXA5
IL6ST	Interleukin 6 Cytokine Family Signal Transducer	Protein Coding	56	GC05M055935	4.12294	https://www.genecards.org/cgi-bin/carddisp.pl?gene=IL6ST
TYR	Tyrosinase	Protein Coding	55	GC11P089177	4.11666	https://www.genecards.org/cgi-bin/carddisp.pl?gene=TYR
BMP2	Bone Morphogenetic Protein 2	Protein Coding	53	GC20P006767	4.1145	https://www.genecards.org/cgi-bin/carddisp.pl?gene=BMP2
ST6GAL1	ST6 Beta-Galactoside Alpha-2,6-Sialyltransferase 1	Protein Coding	51	GC03P186930	4.10839	https://www.genecards.org/cgi-bin/carddisp.pl?gene=ST6GAL1
MMP13	Matrix Metallopeptidase 13	Protein Coding	57	GC11M102942	4.10694	https://www.genecards.org/cgi-bin/carddisp.pl?gene=MMP13
MARCKS	Myristoylated Alanine Rich Protein Kinase C Substrate	Protein Coding	46	GC06P113857	4.10645	https://www.genecards.org/cgi-bin/carddisp.pl?gene=MARCKS
ERN1	Endoplasmic Reticulum To Nucleus Signaling 1	Protein Coding	53	GC17M064039	4.10349	https://www.genecards.org/cgi-bin/carddisp.pl?gene=ERN1
CD38	CD38 Molecule	Protein Coding	53	GC04P019223	4.09158	https://www.genecards.org/cgi-bin/carddisp.pl?gene=CD38
FGFR1	Fibroblast Growth Factor Receptor 1	Protein Coding	63	GC08M038400	4.09137	https://www.genecards.org/cgi-bin/carddisp.pl?gene=FGFR1
RAP1A	RAP1A, Member Of RAS Oncogene Family	Protein Coding	51	GC01P111542	4.08776	https://www.genecards.org/cgi-bin/carddisp.pl?gene=RAP1A
FES	FES Proto-Oncogene, Tyrosine Kinase	Protein Coding	54	GC15P090883	4.08247	https://www.genecards.org/cgi-bin/carddisp.pl?gene=FES
CD207	CD207 Molecule	Protein Coding	46	GC02M070830	4.07737	https://www.genecards.org/cgi-bin/carddisp.pl?gene=CD207
FASN	Fatty Acid Synthase	Protein Coding	55	GC17M082078	4.07705	https://www.genecards.org/cgi-bin/carddisp.pl?gene=FASN
EWSR1	EWS RNA Binding Protein 1	Protein Coding	51	GC22P044790	4.07201	https://www.genecards.org/cgi-bin/carddisp.pl?gene=EWSR1
VCL	Vinculin	Protein Coding	54	GC10P073995	4.07149	https://www.genecards.org/cgi-bin/carddisp.pl?gene=VCL
SMAD3	SMAD Family Member 3	Protein Coding	59	GC15P067063	4.07129	https://www.genecards.org/cgi-bin/carddisp.pl?gene=SMAD3
MUTYH	MutY DNA Glycosylase	Protein Coding	52	GC01M045329	4.06896	https://www.genecards.org/cgi-bin/carddisp.pl?gene=MUTYH
RIGI	RNA Sensor RIG-I	Protein Coding	53	GC09M032462	4.0659	https://www.genecards.org/cgi-bin/carddisp.pl?gene=RIGI
SRSF2	Serine And Arginine Rich Splicing Factor 2	Protein Coding	47	GC17M076734	4.06208	https://www.genecards.org/cgi-bin/carddisp.pl?gene=SRSF2
ENG	Endoglin	Protein Coding	55	GC09M127815	4.06052	https://www.genecards.org/cgi-bin/carddisp.pl?gene=ENG
ENO2	Enolase 2	Protein Coding	54	GC12P006913	4.05732	https://www.genecards.org/cgi-bin/carddisp.pl?gene=ENO2
FLT4	Fms Related Receptor Tyrosine Kinase 4	Protein Coding	59	GC05M180644	4.05474	https://www.genecards.org/cgi-bin/carddisp.pl?gene=FLT4
KLRK1	Killer Cell Lectin Like Receptor K1	Protein Coding	48	GC12M022630	4.0545	https://www.genecards.org/cgi-bin/carddisp.pl?gene=KLRK1
ABHD5	Abhydrolase Domain Containing 5, Lysophosphatidic Acid Acyltransferase	Protein Coding	51	GC03P043707	4.0518	https://www.genecards.org/cgi-bin/carddisp.pl?gene=ABHD5
TCF7L2	Transcription Factor 7 Like 2	Protein Coding	53	GC10P112950	4.04362	https://www.genecards.org/cgi-bin/carddisp.pl?gene=TCF7L2
REL	REL Proto-Oncogene, NF-KB Subunit	Protein Coding	53	GC02P060881	4.03458	https://www.genecards.org/cgi-bin/carddisp.pl?gene=REL
GLA	Galactosidase Alpha	Protein Coding	56	GC0XM101393	4.03198	https://www.genecards.org/cgi-bin/carddisp.pl?gene=GLA
PTHLH	Parathyroid Hormone Like Hormone	Protein Coding	52	GC12M027959	4.02359	https://www.genecards.org/cgi-bin/carddisp.pl?gene=PTHLH
HLA-DRB3	Major Histocompatibility Complex, Class II, DR Beta 3	Protein Coding	34	GC06Mn03715	4.01662	https://www.genecards.org/cgi-bin/carddisp.pl?gene=HLA-DRB3
CST3	Cystatin C	Protein Coding	51	GC20M023686	4.01436	https://www.genecards.org/cgi-bin/carddisp.pl?gene=CST3
ABCA2	ATP Binding Cassette Subfamily A Member 2	Protein Coding	48	GC09M137007	4.01278	https://www.genecards.org/cgi-bin/carddisp.pl?gene=ABCA2
SLC7A11	Solute Carrier Family 7 Member 11	Protein Coding	51	GC04M138164	3.99598	https://www.genecards.org/cgi-bin/carddisp.pl?gene=SLC7A11
MORC2	MORC Family CW-Type Zinc Finger 2	Protein Coding	47	GC22M030925	3.99427	https://www.genecards.org/cgi-bin/carddisp.pl?gene=MORC2
ALCAM	Activated Leukocyte Cell Adhesion Molecule	Protein Coding	50	GC03P105366	3.99058	https://www.genecards.org/cgi-bin/carddisp.pl?gene=ALCAM
RORA	RAR Related Orphan Receptor A	Protein Coding	55	GC15M060488	3.99036	https://www.genecards.org/cgi-bin/carddisp.pl?gene=RORA
MIR145	MicroRNA 145	RNA Gene	26	GC05P149430	3.98996	https://www.genecards.org/cgi-bin/carddisp.pl?gene=MIR145
ATF3	Activating Transcription Factor 3	Protein Coding	51	GC01P212565	3.98956	https://www.genecards.org/cgi-bin/carddisp.pl?gene=ATF3
VAV1	Vav Guanine Nucleotide Exchange Factor 1	Protein Coding	52	GC19P006772	3.97837	https://www.genecards.org/cgi-bin/carddisp.pl?gene=VAV1
LBR	Lamin B Receptor	Protein Coding	54	GC01M225401	3.97783	https://www.genecards.org/cgi-bin/carddisp.pl?gene=LBR
LGMN	Legumain	Protein Coding	49	GC14M092703	3.97759	https://www.genecards.org/cgi-bin/carddisp.pl?gene=LGMN
NUP85	Nucleoporin 85	Protein Coding	48	GC17P075205	3.97141	https://www.genecards.org/cgi-bin/carddisp.pl?gene=NUP85
DCT	Dopachrome Tautomerase	Protein Coding	52	GC13M094436	3.96522	https://www.genecards.org/cgi-bin/carddisp.pl?gene=DCT
PROM1	Prominin 1	Protein Coding	53	GC04M015965	3.9646	https://www.genecards.org/cgi-bin/carddisp.pl?gene=PROM1
FGF1	Fibroblast Growth Factor 1	Protein Coding	54	GC05M142555	3.96394	https://www.genecards.org/cgi-bin/carddisp.pl?gene=FGF1
MLANA	Melan-A	Protein Coding	47	GC09P007673	3.96281	https://www.genecards.org/cgi-bin/carddisp.pl?gene=MLANA
VWF	Von Willebrand Factor	Protein Coding	55	GC12M005949	3.96245	https://www.genecards.org/cgi-bin/carddisp.pl?gene=VWF
CCND2	Cyclin D2	Protein Coding	55	GC12P023493	3.96228	https://www.genecards.org/cgi-bin/carddisp.pl?gene=CCND2
CTSG	Cathepsin G	Protein Coding	52	GC14M024573	3.9608	https://www.genecards.org/cgi-bin/carddisp.pl?gene=CTSG
HSPA5	Heat Shock Protein Family A (Hsp70) Member 5	Protein Coding	55	GC09M125234	3.9578	https://www.genecards.org/cgi-bin/carddisp.pl?gene=HSPA5
TKT	Transketolase	Protein Coding	52	GC03M053224	3.95381	https://www.genecards.org/cgi-bin/carddisp.pl?gene=TKT
DDB1	Damage Specific DNA Binding Protein 1	Protein Coding	52	GC11M099534	3.95181	https://www.genecards.org/cgi-bin/carddisp.pl?gene=DDB1
INS	Insulin	Protein Coding	55	GC11M002159	3.94655	https://www.genecards.org/cgi-bin/carddisp.pl?gene=INS
TERT	Telomerase Reverse Transcriptase	Protein Coding	58	GC05M001253	3.93981	https://www.genecards.org/cgi-bin/carddisp.pl?gene=TERT
NAGA	Alpha-N-Acetylgalactosaminidase	Protein Coding	52	GC22M042058	3.93877	https://www.genecards.org/cgi-bin/carddisp.pl?gene=NAGA
MGLL	Monoglyceride Lipase	Protein Coding	51	GC03M127689	3.92967	https://www.genecards.org/cgi-bin/carddisp.pl?gene=MGLL
THY1	Thy-1 Cell Surface Antigen	Protein Coding	50	GC11M119417	3.92948	https://www.genecards.org/cgi-bin/carddisp.pl?gene=THY1
GAS6	Growth Arrest Specific 6	Protein Coding	51	GC13M113820	3.92466	https://www.genecards.org/cgi-bin/carddisp.pl?gene=GAS6
ADAM12	ADAM Metallopeptidase Domain 12	Protein Coding	52	GC10M126012	3.92338	https://www.genecards.org/cgi-bin/carddisp.pl?gene=ADAM12
DNMT1	DNA Methyltransferase 1	Protein Coding	59	GC19M010133	3.92096	https://www.genecards.org/cgi-bin/carddisp.pl?gene=DNMT1
ADM	Adrenomedullin	Protein Coding	51	GC11P010304	3.92078	https://www.genecards.org/cgi-bin/carddisp.pl?gene=ADM
PADI2	Peptidyl Arginine Deiminase 2	Protein Coding	49	GC01M017066	3.9181	https://www.genecards.org/cgi-bin/carddisp.pl?gene=PADI2
YBX1	Y-Box Binding Protein 1	Protein Coding	46	GC01P042682	3.91427	https://www.genecards.org/cgi-bin/carddisp.pl?gene=YBX1
LITAF	Lipopolysaccharide Induced TNF Factor	Protein Coding	50	GC16M011547	3.91108	https://www.genecards.org/cgi-bin/carddisp.pl?gene=LITAF
IL17D	Interleukin 17D	Protein Coding	44	GC13P020702	3.90755	https://www.genecards.org/cgi-bin/carddisp.pl?gene=IL17D
CFTR	CF Transmembrane Conductance Regulator	Protein Coding	59	GC07P117287	3.90414	https://www.genecards.org/cgi-bin/carddisp.pl?gene=CFTR
CDKN1B	Cyclin Dependent Kinase Inhibitor 1B	Protein Coding	54	GC12P023759	3.90224	https://www.genecards.org/cgi-bin/carddisp.pl?gene=CDKN1B
BCAR1	BCAR1 Scaffold Protein, Cas Family Member	Protein Coding	50	GC16M075228	3.89357	https://www.genecards.org/cgi-bin/carddisp.pl?gene=BCAR1
NME1	NME/NM23 Nucleoside Diphosphate Kinase 1	Protein Coding	51	GC17P062974	3.89312	https://www.genecards.org/cgi-bin/carddisp.pl?gene=NME1
CALCA	Calcitonin Related Polypeptide Alpha	Protein Coding	50	GC11M014945	3.8918	https://www.genecards.org/cgi-bin/carddisp.pl?gene=CALCA
BMP4	Bone Morphogenetic Protein 4	Protein Coding	55	GC14M053949	3.89031	https://www.genecards.org/cgi-bin/carddisp.pl?gene=BMP4
KCNMA1	Potassium Calcium-Activated Channel Subfamily M Alpha 1	Protein Coding	56	GC10M076869	3.88924	https://www.genecards.org/cgi-bin/carddisp.pl?gene=KCNMA1
ADAMTSL1	ADAMTS Like 1	Protein Coding	49	GC09P017906	3.88715	https://www.genecards.org/cgi-bin/carddisp.pl?gene=ADAMTSL1
MME	Membrane Metalloendopeptidase	Protein Coding	57	GC03P155024	3.88587	https://www.genecards.org/cgi-bin/carddisp.pl?gene=MME
IRS2	Insulin Receptor Substrate 2	Protein Coding	51	GC13M109752	3.87838	https://www.genecards.org/cgi-bin/carddisp.pl?gene=IRS2
TACR1	Tachykinin Receptor 1	Protein Coding	51	GC02M075203	3.87038	https://www.genecards.org/cgi-bin/carddisp.pl?gene=TACR1
GFAP	Glial Fibrillary Acidic Protein	Protein Coding	55	GC17M051925	3.86117	https://www.genecards.org/cgi-bin/carddisp.pl?gene=GFAP
CEL	Carboxyl Ester Lipase	Protein Coding	52	GC09P133061	3.86062	https://www.genecards.org/cgi-bin/carddisp.pl?gene=CEL
SNAI1	Snail Family Transcriptional Repressor 1	Protein Coding	51	GC20P049982	3.8568	https://www.genecards.org/cgi-bin/carddisp.pl?gene=SNAI1
SQSTM1	Sequestosome 1	Protein Coding	55	GC05P179806	3.8503	https://www.genecards.org/cgi-bin/carddisp.pl?gene=SQSTM1
NFATC2	Nuclear Factor Of Activated T Cells 2	Protein Coding	52	GC20M051386	3.8466	https://www.genecards.org/cgi-bin/carddisp.pl?gene=NFATC2
VCAN	Versican	Protein Coding	54	GC05P083471	3.84473	https://www.genecards.org/cgi-bin/carddisp.pl?gene=VCAN
PLAT	Plasminogen Activator, Tissue Type	Protein Coding	57	GC08M042174	3.84456	https://www.genecards.org/cgi-bin/carddisp.pl?gene=PLAT
CD33	CD33 Molecule	Protein Coding	52	GC19P073323	3.84159	https://www.genecards.org/cgi-bin/carddisp.pl?gene=CD33
TAP1	Transporter 1, ATP Binding Cassette Subfamily B Member	Protein Coding	55	GC06M071788	3.84104	https://www.genecards.org/cgi-bin/carddisp.pl?gene=TAP1
GREM1	Gremlin 1, DAN Family BMP Antagonist	Protein Coding	50	GC15P046226	3.8298	https://www.genecards.org/cgi-bin/carddisp.pl?gene=GREM1
SRSF1	Serine And Arginine Rich Splicing Factor 1	Protein Coding	48	GC17M058000	3.82376	https://www.genecards.org/cgi-bin/carddisp.pl?gene=SRSF1
SLC2A1	Solute Carrier Family 2 Member 1	Protein Coding	60	GC01M042925	3.81339	https://www.genecards.org/cgi-bin/carddisp.pl?gene=SLC2A1
MAP3K5	Mitogen-Activated Protein Kinase Kinase Kinase 5	Protein Coding	55	GC06M136557	3.81303	https://www.genecards.org/cgi-bin/carddisp.pl?gene=MAP3K5
HSP90B1	Heat Shock Protein 90 Beta Family Member 1	Protein Coding	53	GC12P103930	3.81267	https://www.genecards.org/cgi-bin/carddisp.pl?gene=HSP90B1
ADAM10	ADAM Metallopeptidase Domain 10	Protein Coding	60	GC15M058588	3.81203	https://www.genecards.org/cgi-bin/carddisp.pl?gene=ADAM10
FMNL1	Formin Like 1	Protein Coding	46	GC17P062097	3.80946	https://www.genecards.org/cgi-bin/carddisp.pl?gene=FMNL1
JUNB	JunB Proto-Oncogene, AP-1 Transcription Factor Subunit	Protein Coding	48	GC19P012791	3.80889	https://www.genecards.org/cgi-bin/carddisp.pl?gene=JUNB
MYH9	Myosin Heavy Chain 9	Protein Coding	55	GC22M036281	3.80755	https://www.genecards.org/cgi-bin/carddisp.pl?gene=MYH9
NOX4	NADPH Oxidase 4	Protein Coding	50	GC11M089324	3.80724	https://www.genecards.org/cgi-bin/carddisp.pl?gene=NOX4
SELP	Selectin P	Protein Coding	52	GC01M169558	3.8021	https://www.genecards.org/cgi-bin/carddisp.pl?gene=SELP
EZR	Ezrin	Protein Coding	53	GC06M158765	3.80048	https://www.genecards.org/cgi-bin/carddisp.pl?gene=EZR
NEAT1	Nuclear Paraspeckle Assembly Transcript 1	RNA Gene	28	GC11P070859	3.79753	https://www.genecards.org/cgi-bin/carddisp.pl?gene=NEAT1
CGA	Glycoprotein Hormones, Alpha Polypeptide	Protein Coding	51	GC06M087085	3.79426	https://www.genecards.org/cgi-bin/carddisp.pl?gene=CGA
CTAG1B	Cancer/Testis Antigen 1B	Protein Coding	35	GC0XM154617	3.79171	https://www.genecards.org/cgi-bin/carddisp.pl?gene=CTAG1B
SLPI	Secretory Leukocyte Peptidase Inhibitor	Protein Coding	47	GC20M045252	3.78448	https://www.genecards.org/cgi-bin/carddisp.pl?gene=SLPI
MUC4	Mucin 4, Cell Surface Associated	Protein Coding	47	GC03M195746	3.78442	https://www.genecards.org/cgi-bin/carddisp.pl?gene=MUC4
HPSE	Heparanase	Protein Coding	52	GC04M083292	3.78336	https://www.genecards.org/cgi-bin/carddisp.pl?gene=HPSE
BAX	BCL2 Associated X, Apoptosis Regulator	Protein Coding	57	GC19P048954	3.78279	https://www.genecards.org/cgi-bin/carddisp.pl?gene=BAX
HNRNPM	Heterogeneous Nuclear Ribonucleoprotein M	Protein Coding	47	GC19P008444	3.78086	https://www.genecards.org/cgi-bin/carddisp.pl?gene=HNRNPM
NF1	Neurofibromin 1	Protein Coding	54	GC17P031094	3.77904	https://www.genecards.org/cgi-bin/carddisp.pl?gene=NF1
BIRC2	Baculoviral IAP Repeat Containing 2	Protein Coding	53	GC11P102347	3.7763	https://www.genecards.org/cgi-bin/carddisp.pl?gene=BIRC2
LCN2	Lipocalin 2	Protein Coding	52	GC09P128149	3.77446	https://www.genecards.org/cgi-bin/carddisp.pl?gene=LCN2
IL18BP	Interleukin 18 Binding Protein	Protein Coding	48	GC11P071998	3.77252	https://www.genecards.org/cgi-bin/carddisp.pl?gene=IL18BP
PCSK9	Proprotein Convertase Subtilisin/Kexin Type 9	Protein Coding	57	GC01P055039	3.76742	https://www.genecards.org/cgi-bin/carddisp.pl?gene=PCSK9
DHX30	DExH-Box Helicase 30	Protein Coding	47	GC03P047802	3.76394	https://www.genecards.org/cgi-bin/carddisp.pl?gene=DHX30
CDKN3	Cyclin Dependent Kinase Inhibitor 3	Protein Coding	48	GC14P054398	3.76294	https://www.genecards.org/cgi-bin/carddisp.pl?gene=CDKN3
ALK	ALK Receptor Tyrosine Kinase	Protein Coding	59	GC02M029190	3.74998	https://www.genecards.org/cgi-bin/carddisp.pl?gene=ALK
SPON2	Spondin 2	Protein Coding	47	GC04M001166	3.74882	https://www.genecards.org/cgi-bin/carddisp.pl?gene=SPON2
YWHAZ	Tyrosine 3-Monooxygenase/Tryptophan 5-Monooxygenase Activation Protein Zeta	Protein Coding	52	GC08M100917	3.74771	https://www.genecards.org/cgi-bin/carddisp.pl?gene=YWHAZ
STX4	Syntaxin 4	Protein Coding	48	GC16P042831	3.74768	https://www.genecards.org/cgi-bin/carddisp.pl?gene=STX4
KCNN4	Potassium Calcium-Activated Channel Subfamily N Member 4	Protein Coding	55	GC19M070686	3.74706	https://www.genecards.org/cgi-bin/carddisp.pl?gene=KCNN4
CCN1	Cellular Communication Network Factor 1	Protein Coding	47	GC01P085581	3.7463	https://www.genecards.org/cgi-bin/carddisp.pl?gene=CCN1
PSG2	Pregnancy Specific Beta-1-Glycoprotein 2	Protein Coding	40	GC19M043064	3.74302	https://www.genecards.org/cgi-bin/carddisp.pl?gene=PSG2
BCL2L11	BCL2 Like 11	Protein Coding	52	GC02P111119	3.74281	https://www.genecards.org/cgi-bin/carddisp.pl?gene=BCL2L11
PDPN	Podoplanin	Protein Coding	48	GC01P013583	3.74203	https://www.genecards.org/cgi-bin/carddisp.pl?gene=PDPN
HDC	Histidine Decarboxylase	Protein Coding	51	GC15M050241	3.74126	https://www.genecards.org/cgi-bin/carddisp.pl?gene=HDC
ZEB2	Zinc Finger E-Box Binding Homeobox 2	Protein Coding	54	GC02M144384	3.73815	https://www.genecards.org/cgi-bin/carddisp.pl?gene=ZEB2
CD248	CD248 Molecule	Protein Coding	46	GC11M066314	3.73629	https://www.genecards.org/cgi-bin/carddisp.pl?gene=CD248
GBP5	Guanylate Binding Protein 5	Protein Coding	43	GC01M089259	3.73412	https://www.genecards.org/cgi-bin/carddisp.pl?gene=GBP5
ENO1	Enolase 1	Protein Coding	54	GC01M008861	3.73214	https://www.genecards.org/cgi-bin/carddisp.pl?gene=ENO1
GATA2	GATA Binding Protein 2	Protein Coding	55	GC03M128479	3.73062	https://www.genecards.org/cgi-bin/carddisp.pl?gene=GATA2
FLI1	Fli-1 Proto-Oncogene, ETS Transcription Factor	Protein Coding	54	GC11P128686	3.73035	https://www.genecards.org/cgi-bin/carddisp.pl?gene=FLI1
ST3GAL4	ST3 Beta-Galactoside Alpha-2,3-Sialyltransferase 4	Protein Coding	50	GC11P126355	3.72592	https://www.genecards.org/cgi-bin/carddisp.pl?gene=ST3GAL4
SOS1	SOS Ras/Rac Guanine Nucleotide Exchange Factor 1	Protein Coding	56	GC02M039054	3.72468	https://www.genecards.org/cgi-bin/carddisp.pl?gene=SOS1
DNMT3A	DNA Methyltransferase 3 Alpha	Protein Coding	57	GC02M025228	3.72309	https://www.genecards.org/cgi-bin/carddisp.pl?gene=DNMT3A
TGFB3	Transforming Growth Factor Beta 3	Protein Coding	54	GC14M075958	3.71859	https://www.genecards.org/cgi-bin/carddisp.pl?gene=TGFB3
NRP2	Neuropilin 2	Protein Coding	52	GC02P205681	3.71347	https://www.genecards.org/cgi-bin/carddisp.pl?gene=NRP2
ADORA1	Adenosine A1 Receptor	Protein Coding	53	GC01P203090	3.71136	https://www.genecards.org/cgi-bin/carddisp.pl?gene=ADORA1
VEGFD	Vascular Endothelial Growth Factor D	Protein Coding	47	GC0XM015345	3.7099	https://www.genecards.org/cgi-bin/carddisp.pl?gene=VEGFD
ARHGAP26	Rho GTPase Activating Protein 26	Protein Coding	52	GC05P142770	3.70979	https://www.genecards.org/cgi-bin/carddisp.pl?gene=ARHGAP26
PTPN3	Protein Tyrosine Phosphatase Non-Receptor Type 3	Protein Coding	51	GC09M109375	3.70436	https://www.genecards.org/cgi-bin/carddisp.pl?gene=PTPN3
CCN2	Cellular Communication Network Factor 2	Protein Coding	53	GC06M131948	3.69743	https://www.genecards.org/cgi-bin/carddisp.pl?gene=CCN2
CD8A	CD8a Molecule	Protein Coding	54	GC02M086784	3.69736	https://www.genecards.org/cgi-bin/carddisp.pl?gene=CD8A
TGFBR1	Transforming Growth Factor Beta Receptor 1	Protein Coding	61	GC09P099104	3.69636	https://www.genecards.org/cgi-bin/carddisp.pl?gene=TGFBR1
TGFBI	Transforming Growth Factor Beta Induced	Protein Coding	53	GC05P136027	3.68762	https://www.genecards.org/cgi-bin/carddisp.pl?gene=TGFBI
PLG	Plasminogen	Protein Coding	56	GC06P160702	3.68724	https://www.genecards.org/cgi-bin/carddisp.pl?gene=PLG
IGF2BP2	Insulin Like Growth Factor 2 MRNA Binding Protein 2	Protein Coding	51	GC03M185643	3.67373	https://www.genecards.org/cgi-bin/carddisp.pl?gene=IGF2BP2
FUT4	Fucosyltransferase 4	Protein Coding	44	GC11P094544	3.67251	https://www.genecards.org/cgi-bin/carddisp.pl?gene=FUT4
CYP24A1	Cytochrome P450 Family 24 Subfamily A Member 1	Protein Coding	53	GC20M054153	3.66697	https://www.genecards.org/cgi-bin/carddisp.pl?gene=CYP24A1
RPSA	Ribosomal Protein SA	Protein Coding	53	GC03P039406	3.66358	https://www.genecards.org/cgi-bin/carddisp.pl?gene=RPSA
MAPK7	Mitogen-Activated Protein Kinase 7	Protein Coding	54	GC17P061131	3.66137	https://www.genecards.org/cgi-bin/carddisp.pl?gene=MAPK7
STC1	Stanniocalcin 1	Protein Coding	48	GC08M023841	3.65619	https://www.genecards.org/cgi-bin/carddisp.pl?gene=STC1
LCK	LCK Proto-Oncogene, Src Family Tyrosine Kinase	Protein Coding	59	GC01P032251	3.65183	https://www.genecards.org/cgi-bin/carddisp.pl?gene=LCK
CEACAM7	CEA Cell Adhesion Molecule 7	Protein Coding	44	GC19M041673	3.65161	https://www.genecards.org/cgi-bin/carddisp.pl?gene=CEACAM7
NCL	Nucleolin	Protein Coding	51	GC02M231453	3.64566	https://www.genecards.org/cgi-bin/carddisp.pl?gene=NCL
CALM2	Calmodulin 2	Protein Coding	51	GC02M047124	3.64535	https://www.genecards.org/cgi-bin/carddisp.pl?gene=CALM2
PTGER2	Prostaglandin E Receptor 2	Protein Coding	55	GC14P052314	3.64212	https://www.genecards.org/cgi-bin/carddisp.pl?gene=PTGER2
NOD1	Nucleotide Binding Oligomerization Domain Containing 1	Protein Coding	50	GC07M030424	3.63261	https://www.genecards.org/cgi-bin/carddisp.pl?gene=NOD1
HSPA8	Heat Shock Protein Family A (Hsp70) Member 8	Protein Coding	56	GC11M123057	3.63208	https://www.genecards.org/cgi-bin/carddisp.pl?gene=HSPA8
IL13RA1	Interleukin 13 Receptor Subunit Alpha 1	Protein Coding	48	GC0XP118727	3.62912	https://www.genecards.org/cgi-bin/carddisp.pl?gene=IL13RA1
LPIN1	Lipin 1	Protein Coding	54	GC02P011677	3.62247	https://www.genecards.org/cgi-bin/carddisp.pl?gene=LPIN1
PDCD1LG2	Programmed Cell Death 1 Ligand 2	Protein Coding	50	GC09P005510	3.62224	https://www.genecards.org/cgi-bin/carddisp.pl?gene=PDCD1LG2
SAA1	Serum Amyloid A1	Protein Coding	46	GC11P018579	3.62188	https://www.genecards.org/cgi-bin/carddisp.pl?gene=SAA1
PIM1	Pim-1 Proto-Oncogene, Serine/Threonine Kinase	Protein Coding	56	GC06P092302	3.62151	https://www.genecards.org/cgi-bin/carddisp.pl?gene=PIM1
RHOB	Ras Homolog Family Member B	Protein Coding	51	GC02P020447	3.6158	https://www.genecards.org/cgi-bin/carddisp.pl?gene=RHOB
CD55	CD55 Molecule (Cromer Blood Group)	Protein Coding	56	GC01P207321	3.615	https://www.genecards.org/cgi-bin/carddisp.pl?gene=CD55
LMNB1	Lamin B1	Protein Coding	53	GC05P126776	3.61317	https://www.genecards.org/cgi-bin/carddisp.pl?gene=LMNB1
TUBB	Tubulin Beta Class I	Protein Coding	57	GC06P092134	3.60989	https://www.genecards.org/cgi-bin/carddisp.pl?gene=TUBB
BRCA1	BRCA1 DNA Repair Associated	Protein Coding	56	GC17M043044	3.60857	https://www.genecards.org/cgi-bin/carddisp.pl?gene=BRCA1
FAP	Fibroblast Activation Protein Alpha	Protein Coding	52	GC02M162170	3.60787	https://www.genecards.org/cgi-bin/carddisp.pl?gene=FAP
GPC3	Glypican 3	Protein Coding	53	GC0XM133535	3.60496	https://www.genecards.org/cgi-bin/carddisp.pl?gene=GPC3
PRDX1	Peroxiredoxin 1	Protein Coding	56	GC01M045512	3.60482	https://www.genecards.org/cgi-bin/carddisp.pl?gene=PRDX1
SRSF5	Serine And Arginine Rich Splicing Factor 5	Protein Coding	47	GC14P069727	3.59626	https://www.genecards.org/cgi-bin/carddisp.pl?gene=SRSF5
MMP8	Matrix Metallopeptidase 8	Protein Coding	55	GC11M102712	3.58643	https://www.genecards.org/cgi-bin/carddisp.pl?gene=MMP8
UBC	Ubiquitin C	Protein Coding	49	GC12M124911	3.58577	https://www.genecards.org/cgi-bin/carddisp.pl?gene=UBC
TEK	TEK Receptor Tyrosine Kinase	Protein Coding	58	GC09P027109	3.5841	https://www.genecards.org/cgi-bin/carddisp.pl?gene=TEK
SEMA4D	Semaphorin 4D	Protein Coding	53	GC09M089360	3.57719	https://www.genecards.org/cgi-bin/carddisp.pl?gene=SEMA4D
ADGRE5	Adhesion G Protein-Coupled Receptor E5	Protein Coding	51	GC19P014880	3.57621	https://www.genecards.org/cgi-bin/carddisp.pl?gene=ADGRE5
IMPDH2	Inosine Monophosphate Dehydrogenase 2	Protein Coding	55	GC03M051546	3.57457	https://www.genecards.org/cgi-bin/carddisp.pl?gene=IMPDH2
DGCR8	DGCR8 Microprocessor Complex Subunit	Protein Coding	48	GC22P020080	3.56517	https://www.genecards.org/cgi-bin/carddisp.pl?gene=DGCR8
NR4A1AS	NR4A1 Antisense RNA	RNA Gene	14	GC12M052059	3.56287	https://www.genecards.org/cgi-bin/carddisp.pl?gene=NR4A1AS
PEBP1	Phosphatidylethanolamine Binding Protein 1	Protein Coding	53	GC12P118135	3.56052	https://www.genecards.org/cgi-bin/carddisp.pl?gene=PEBP1
ITGA6	Integrin Subunit Alpha 6	Protein Coding	56	GC02P172427	3.56041	https://www.genecards.org/cgi-bin/carddisp.pl?gene=ITGA6
MKI67	Marker Of Proliferation Ki-67	Protein Coding	51	GC10M128096	3.55661	https://www.genecards.org/cgi-bin/carddisp.pl?gene=MKI67
BRD4	Bromodomain Containing 4	Protein Coding	55	GC19M015236	3.55556	https://www.genecards.org/cgi-bin/carddisp.pl?gene=BRD4
DDX17	DEAD-Box Helicase 17	Protein Coding	47	GC22M038483	3.55278	https://www.genecards.org/cgi-bin/carddisp.pl?gene=DDX17
COX5A	Cytochrome C Oxidase Subunit 5A	Protein Coding	50	GC15M074919	3.55166	https://www.genecards.org/cgi-bin/carddisp.pl?gene=COX5A
BGLAP	Bone Gamma-Carboxyglutamate Protein	Protein Coding	46	GC01P156242	3.54887	https://www.genecards.org/cgi-bin/carddisp.pl?gene=BGLAP
SART1	Spliceosome Associated Factor 1, Recruiter Of U4/U6.U5 Tri-SnRNP	Protein Coding	46	GC11P070903	3.5451	https://www.genecards.org/cgi-bin/carddisp.pl?gene=SART1
SIGLEC7	Sialic Acid Binding Ig Like Lectin 7	Protein Coding	48	GC19P051142	3.54384	https://www.genecards.org/cgi-bin/carddisp.pl?gene=SIGLEC7
TET2	Tet Methylcytosine Dioxygenase 2	Protein Coding	52	GC04P105145	3.54357	https://www.genecards.org/cgi-bin/carddisp.pl?gene=TET2
KLK8	Kallikrein Related Peptidase 8	Protein Coding	49	GC19M050996	3.53749	https://www.genecards.org/cgi-bin/carddisp.pl?gene=KLK8
CDKN2B	Cyclin Dependent Kinase Inhibitor 2B	Protein Coding	53	GC09M022002	3.53529	https://www.genecards.org/cgi-bin/carddisp.pl?gene=CDKN2B
ACTN4	Actinin Alpha 4	Protein Coding	53	GC19P038647	3.53483	https://www.genecards.org/cgi-bin/carddisp.pl?gene=ACTN4
XRCC1	X-Ray Repair Cross Complementing 1	Protein Coding	51	GC19M043543	3.53481	https://www.genecards.org/cgi-bin/carddisp.pl?gene=XRCC1
LAG3	Lymphocyte Activating 3	Protein Coding	48	GC12P023550	3.52909	https://www.genecards.org/cgi-bin/carddisp.pl?gene=LAG3
TIAM1	TIAM Rac1 Associated GEF 1	Protein Coding	51	GC21M031118	3.52068	https://www.genecards.org/cgi-bin/carddisp.pl?gene=TIAM1
GSTP1	Glutathione S-Transferase Pi 1	Protein Coding	57	GC11P067583	3.5183	https://www.genecards.org/cgi-bin/carddisp.pl?gene=GSTP1
PRDM1	PR/SET Domain 1	Protein Coding	51	GC06P105993	3.51154	https://www.genecards.org/cgi-bin/carddisp.pl?gene=PRDM1
CUX1	Cut Like Homeobox 1	Protein Coding	51	GC07P101815	3.50749	https://www.genecards.org/cgi-bin/carddisp.pl?gene=CUX1
EIF4A1	Eukaryotic Translation Initiation Factor 4A1	Protein Coding	53	GC17P007572	3.50725	https://www.genecards.org/cgi-bin/carddisp.pl?gene=EIF4A1
LDHA	Lactate Dehydrogenase A	Protein Coding	57	GC11P018394	3.50488	https://www.genecards.org/cgi-bin/carddisp.pl?gene=LDHA
EIF2AK4	Eukaryotic Translation Initiation Factor 2 Alpha Kinase 4	Protein Coding	52	GC15P039934	3.5016	https://www.genecards.org/cgi-bin/carddisp.pl?gene=EIF2AK4
CXCL6	C-X-C Motif Chemokine Ligand 6	Protein Coding	46	GC04P073837	3.50094	https://www.genecards.org/cgi-bin/carddisp.pl?gene=CXCL6
RARA	Retinoic Acid Receptor Alpha	Protein Coding	57	GC17P040309	3.50058	https://www.genecards.org/cgi-bin/carddisp.pl?gene=RARA
TSC2	TSC Complex Subunit 2	Protein Coding	56	GC16P013513	3.49816	https://www.genecards.org/cgi-bin/carddisp.pl?gene=TSC2
GRK2	G Protein-Coupled Receptor Kinase 2	Protein Coding	53	GC11P067266	3.49801	https://www.genecards.org/cgi-bin/carddisp.pl?gene=GRK2
ADAR	Adenosine Deaminase RNA Specific	Protein Coding	52	GC01M154599	3.495	https://www.genecards.org/cgi-bin/carddisp.pl?gene=ADAR
AHSG	Alpha 2-HS Glycoprotein	Protein Coding	51	GC03P186636	3.49127	https://www.genecards.org/cgi-bin/carddisp.pl?gene=AHSG
SMARCB1	SWI/SNF Related, Matrix Associated, Actin Dependent Regulator Of Chromatin, Subfamily B, Member 1	Protein Coding	53	GC22P023786	3.49001	https://www.genecards.org/cgi-bin/carddisp.pl?gene=SMARCB1
LRRC56	Leucine Rich Repeat Containing 56	Protein Coding	41	GC11P000518	3.48067	https://www.genecards.org/cgi-bin/carddisp.pl?gene=LRRC56
SPN	Sialophorin	Protein Coding	47	GC16P029662	3.47891	https://www.genecards.org/cgi-bin/carddisp.pl?gene=SPN
CHST2	Carbohydrate Sulfotransferase 2	Protein Coding	46	GC03P143119	3.47819	https://www.genecards.org/cgi-bin/carddisp.pl?gene=CHST2
MIR125B1	MicroRNA 125b-1	RNA Gene	24	GC11M122100	3.47677	https://www.genecards.org/cgi-bin/carddisp.pl?gene=MIR125B1
HLA-DMB	Major Histocompatibility Complex, Class II, DM Beta	Protein Coding	46	GC06M032934	3.47564	https://www.genecards.org/cgi-bin/carddisp.pl?gene=HLA-DMB
COL1A1	Collagen Type I Alpha 1 Chain	Protein Coding	56	GC17M052191	3.46773	https://www.genecards.org/cgi-bin/carddisp.pl?gene=COL1A1
ACACA	Acetyl-CoA Carboxylase Alpha	Protein Coding	55	GC17M037084	3.46574	https://www.genecards.org/cgi-bin/carddisp.pl?gene=ACACA
HABP2	Hyaluronan Binding Protein 2	Protein Coding	52	GC10P113550	3.46494	https://www.genecards.org/cgi-bin/carddisp.pl?gene=HABP2
PPP1CB	Protein Phosphatase 1 Catalytic Subunit Beta	Protein Coding	52	GC02P028752	3.46368	https://www.genecards.org/cgi-bin/carddisp.pl?gene=PPP1CB
TRAF2	TNF Receptor Associated Factor 2	Protein Coding	51	GC09P136881	3.45709	https://www.genecards.org/cgi-bin/carddisp.pl?gene=TRAF2
SCD	Stearoyl-CoA Desaturase	Protein Coding	57	GC10P100347	3.45644	https://www.genecards.org/cgi-bin/carddisp.pl?gene=SCD
LCP1	Lymphocyte Cytosolic Protein 1	Protein Coding	49	GC13M046132	3.45594	https://www.genecards.org/cgi-bin/carddisp.pl?gene=LCP1
HSPB1	Heat Shock Protein Family B (Small) Member 1	Protein Coding	59	GC07P076302	3.44775	https://www.genecards.org/cgi-bin/carddisp.pl?gene=HSPB1
GNAI1	G Protein Subunit Alpha I1	Protein Coding	53	GC07P079769	3.44757	https://www.genecards.org/cgi-bin/carddisp.pl?gene=GNAI1
HNRNPA2B1	Heterogeneous Nuclear Ribonucleoprotein A2/B1	Protein Coding	52	GC07M026174	3.44377	https://www.genecards.org/cgi-bin/carddisp.pl?gene=HNRNPA2B1
CHID1	Chitinase Domain Containing 1	Protein Coding	43	GC11M000867	3.44374	https://www.genecards.org/cgi-bin/carddisp.pl?gene=CHID1
ZBP1	Z-DNA Binding Protein 1	Protein Coding	47	GC20M057603	3.44328	https://www.genecards.org/cgi-bin/carddisp.pl?gene=ZBP1
ACTA1	Actin Alpha 1, Skeletal Muscle	Protein Coding	55	GC01M229647	3.4335	https://www.genecards.org/cgi-bin/carddisp.pl?gene=ACTA1
MAP2K7	Mitogen-Activated Protein Kinase Kinase 7	Protein Coding	52	GC19P007903	3.43138	https://www.genecards.org/cgi-bin/carddisp.pl?gene=MAP2K7
ITGA5	Integrin Subunit Alpha 5	Protein Coding	56	GC12M055005	3.43064	https://www.genecards.org/cgi-bin/carddisp.pl?gene=ITGA5
CFLAR	CASP8 And FADD Like Apoptosis Regulator	Protein Coding	51	GC02P201122	3.43049	https://www.genecards.org/cgi-bin/carddisp.pl?gene=CFLAR
WT1-AS	WT1 Antisense RNA	RNA Gene	32	GC11P032434	3.42972	https://www.genecards.org/cgi-bin/carddisp.pl?gene=WT1-AS
HNRNPL	Heterogeneous Nuclear Ribonucleoprotein L	Protein Coding	47	GC19M038836	3.42924	https://www.genecards.org/cgi-bin/carddisp.pl?gene=HNRNPL
NDUFS4	NADH:Ubiquinone Oxidoreductase Subunit S4	Protein Coding	50	GC05P053560	3.42868	https://www.genecards.org/cgi-bin/carddisp.pl?gene=NDUFS4
SEMA3A	Semaphorin 3A	Protein Coding	53	GC07M083955	3.42493	https://www.genecards.org/cgi-bin/carddisp.pl?gene=SEMA3A
RPL29	Ribosomal Protein L29	Protein Coding	46	GC03M052043	3.4229	https://www.genecards.org/cgi-bin/carddisp.pl?gene=RPL29
SERPINC1	Serpin Family C Member 1	Protein Coding	56	GC01M174653	3.42109	https://www.genecards.org/cgi-bin/carddisp.pl?gene=SERPINC1
DCN	Decorin	Protein Coding	54	GC12M091140	3.41978	https://www.genecards.org/cgi-bin/carddisp.pl?gene=DCN
JMJD1C	Jumonji Domain Containing 1C	Protein Coding	48	GC10M063167	3.41659	https://www.genecards.org/cgi-bin/carddisp.pl?gene=JMJD1C
ICOSLG	Inducible T Cell Costimulator Ligand	Protein Coding	48	GC21M044222	3.40993	https://www.genecards.org/cgi-bin/carddisp.pl?gene=ICOSLG
CD82	CD82 Molecule	Protein Coding	50	GC11P044586	3.40568	https://www.genecards.org/cgi-bin/carddisp.pl?gene=CD82
RET	Ret Proto-Oncogene	Protein Coding	61	GC10P043237	3.40319	https://www.genecards.org/cgi-bin/carddisp.pl?gene=RET
KRT7	Keratin 7	Protein Coding	48	GC12P052232	3.40171	https://www.genecards.org/cgi-bin/carddisp.pl?gene=KRT7
PRKN	Parkin RBR E3 Ubiquitin Protein Ligase	Protein Coding	53	GC06M161348	3.39423	https://www.genecards.org/cgi-bin/carddisp.pl?gene=PRKN
RPS3	Ribosomal Protein S3	Protein Coding	50	GC11P078458	3.38838	https://www.genecards.org/cgi-bin/carddisp.pl?gene=RPS3
CCL16	C-C Motif Chemokine Ligand 16	Protein Coding	43	GC17M035976	3.38321	https://www.genecards.org/cgi-bin/carddisp.pl?gene=CCL16
IL22	Interleukin 22	Protein Coding	49	GC12M068248	3.3825	https://www.genecards.org/cgi-bin/carddisp.pl?gene=IL22
CSTA	Cystatin A	Protein Coding	51	GC03P122325	3.37481	https://www.genecards.org/cgi-bin/carddisp.pl?gene=CSTA
MAGEA1	MAGE Family Member A1	Protein Coding	42	GC0XP153179	3.37348	https://www.genecards.org/cgi-bin/carddisp.pl?gene=MAGEA1
IGF2R	Insulin Like Growth Factor 2 Receptor	Protein Coding	52	GC06P159969	3.37204	https://www.genecards.org/cgi-bin/carddisp.pl?gene=IGF2R
MIR30C1	MicroRNA 30c-1	RNA Gene	24	GC01P040757	3.36571	https://www.genecards.org/cgi-bin/carddisp.pl?gene=MIR30C1
RPS19	Ribosomal Protein S19	Protein Coding	55	GC19P072942	3.36504	https://www.genecards.org/cgi-bin/carddisp.pl?gene=RPS19
TG	Thyroglobulin	Protein Coding	51	GC08P132866	3.36394	https://www.genecards.org/cgi-bin/carddisp.pl?gene=TG
LINC00665	Long Intergenic Non-Protein Coding RNA 665	RNA Gene	19	GC19M071884	3.3618	https://www.genecards.org/cgi-bin/carddisp.pl?gene=LINC00665
YWHAQ	Tyrosine 3-Monooxygenase/Tryptophan 5-Monooxygenase Activation Protein Theta	Protein Coding	52	GC02M009583	3.36084	https://www.genecards.org/cgi-bin/carddisp.pl?gene=YWHAQ
NQO1	NAD(P)H Quinone Dehydrogenase 1	Protein Coding	55	GC16M069706	3.3576	https://www.genecards.org/cgi-bin/carddisp.pl?gene=NQO1
SHARPIN	SHANK Associated RH Domain Interactor	Protein Coding	46	GC08M144098	3.35675	https://www.genecards.org/cgi-bin/carddisp.pl?gene=SHARPIN
AFP	Alpha Fetoprotein	Protein Coding	53	GC04P073431	3.35545	https://www.genecards.org/cgi-bin/carddisp.pl?gene=AFP
MUC5AC	Mucin 5AC, Oligomeric Mucus/Gel-Forming	Protein Coding	46	GC11P002129	3.3534	https://www.genecards.org/cgi-bin/carddisp.pl?gene=MUC5AC
FMOD	Fibromodulin	Protein Coding	48	GC01M203340	3.35173	https://www.genecards.org/cgi-bin/carddisp.pl?gene=FMOD
PCNA	Proliferating Cell Nuclear Antigen	Protein Coding	57	GC20M005114	3.349	https://www.genecards.org/cgi-bin/carddisp.pl?gene=PCNA
SUCNR1	Succinate Receptor 1	Protein Coding	46	GC03P151873	3.34537	https://www.genecards.org/cgi-bin/carddisp.pl?gene=SUCNR1
PCCA	Propionyl-CoA Carboxylase Subunit Alpha	Protein Coding	53	GC13P100089	3.34502	https://www.genecards.org/cgi-bin/carddisp.pl?gene=PCCA
PGR	Progesterone Receptor	Protein Coding	56	GC11M102130	3.34386	https://www.genecards.org/cgi-bin/carddisp.pl?gene=PGR
SMAD4	SMAD Family Member 4	Protein Coding	59	GC18P051028	3.3431	https://www.genecards.org/cgi-bin/carddisp.pl?gene=SMAD4
ACKR2	Atypical Chemokine Receptor 2	Protein Coding	47	GC03P042804	3.34272	https://www.genecards.org/cgi-bin/carddisp.pl?gene=ACKR2
LAMP3	Lysosomal Associated Membrane Protein 3	Protein Coding	45	GC03M183122	3.33962	https://www.genecards.org/cgi-bin/carddisp.pl?gene=LAMP3
VASH1	Vasohibin 1	Protein Coding	44	GC14P076761	3.33777	https://www.genecards.org/cgi-bin/carddisp.pl?gene=VASH1
FSCN1	Fascin Actin-Bundling Protein 1	Protein Coding	51	GC07P005592	3.33578	https://www.genecards.org/cgi-bin/carddisp.pl?gene=FSCN1
ATF2	Activating Transcription Factor 2	Protein Coding	54	GC02M175072	3.33552	https://www.genecards.org/cgi-bin/carddisp.pl?gene=ATF2
TMSB4X	Thymosin Beta 4 X-Linked	Protein Coding	46	GC0XP012975	3.33275	https://www.genecards.org/cgi-bin/carddisp.pl?gene=TMSB4X
ENPP2	Ectonucleotide Pyrophosphatase/Phosphodiesterase 2	Protein Coding	52	GC08M119556	3.3317	https://www.genecards.org/cgi-bin/carddisp.pl?gene=ENPP2
RARB	Retinoic Acid Receptor Beta	Protein Coding	56	GC03P024689	3.33064	https://www.genecards.org/cgi-bin/carddisp.pl?gene=RARB
CD46	CD46 Molecule	Protein Coding	55	GC01P207752	3.32685	https://www.genecards.org/cgi-bin/carddisp.pl?gene=CD46
ABCB1	ATP Binding Cassette Subfamily B Member 1	Protein Coding	57	GC07M087504	3.32436	https://www.genecards.org/cgi-bin/carddisp.pl?gene=ABCB1
ACTG1	Actin Gamma 1	Protein Coding	55	GC17M081509	3.31818	https://www.genecards.org/cgi-bin/carddisp.pl?gene=ACTG1
STK11	Serine/Threonine Kinase 11	Protein Coding	57	GC19P001177	3.3119	https://www.genecards.org/cgi-bin/carddisp.pl?gene=STK11
FGD5-AS1	FGD5 Antisense RNA 1	RNA Gene	19	GC03M021839	3.30941	https://www.genecards.org/cgi-bin/carddisp.pl?gene=FGD5-AS1
MFGE8	Milk Fat Globule EGF And Factor V/VIII Domain Containing	Protein Coding	51	GC15M088898	3.30897	https://www.genecards.org/cgi-bin/carddisp.pl?gene=MFGE8
ACTA2	Actin Alpha 2, Smooth Muscle	Protein Coding	53	GC10M088935	3.30139	https://www.genecards.org/cgi-bin/carddisp.pl?gene=ACTA2
FOSL1	FOS Like 1, AP-1 Transcription Factor Subunit	Protein Coding	51	GC11M099737	3.30128	https://www.genecards.org/cgi-bin/carddisp.pl?gene=FOSL1
RBPJ	Recombination Signal Binding Protein For Immunoglobulin Kappa J Region	Protein Coding	53	GC04P026105	3.30059	https://www.genecards.org/cgi-bin/carddisp.pl?gene=RBPJ
DHX9	DExH-Box Helicase 9	Protein Coding	48	GC01P182839	3.30041	https://www.genecards.org/cgi-bin/carddisp.pl?gene=DHX9
USP7	Ubiquitin Specific Peptidase 7	Protein Coding	56	GC16M008892	3.30003	https://www.genecards.org/cgi-bin/carddisp.pl?gene=USP7
CTSH	Cathepsin H	Protein Coding	53	GC15M122427	3.2981	https://www.genecards.org/cgi-bin/carddisp.pl?gene=CTSH
MIR130A	MicroRNA 130a	RNA Gene	24	GC11P057641	3.29692	https://www.genecards.org/cgi-bin/carddisp.pl?gene=MIR130A
PRKACA	Protein Kinase CAMP-Activated Catalytic Subunit Alpha	Protein Coding	59	GC19M014672	3.29623	https://www.genecards.org/cgi-bin/carddisp.pl?gene=PRKACA
RPL19	Ribosomal Protein L19	Protein Coding	48	GC17P039200	3.29495	https://www.genecards.org/cgi-bin/carddisp.pl?gene=RPL19
DIDO1	Death Inducer-Obliterator 1	Protein Coding	46	GC20M062877	3.29359	https://www.genecards.org/cgi-bin/carddisp.pl?gene=DIDO1
CA2	Carbonic Anhydrase 2	Protein Coding	59	GC08P085463	3.29047	https://www.genecards.org/cgi-bin/carddisp.pl?gene=CA2
TIMP2	TIMP Metallopeptidase Inhibitor 2	Protein Coding	48	GC17M078852	3.29047	https://www.genecards.org/cgi-bin/carddisp.pl?gene=TIMP2
CD3G	CD3 Gamma Subunit Of T-Cell Receptor Complex	Protein Coding	54	GC11P118344	3.28272	https://www.genecards.org/cgi-bin/carddisp.pl?gene=CD3G
TIMD4	T Cell Immunoglobulin And Mucin Domain Containing 4	Protein Coding	46	GC05M156919	3.28144	https://www.genecards.org/cgi-bin/carddisp.pl?gene=TIMD4
AGFG1	ArfGAP With FG Repeats 1	Protein Coding	47	GC02P227473	3.27937	https://www.genecards.org/cgi-bin/carddisp.pl?gene=AGFG1
FUT1	Fucosyltransferase 1 (H Blood Group)	Protein Coding	47	GC19M048748	3.27809	https://www.genecards.org/cgi-bin/carddisp.pl?gene=FUT1
CBLB	Cbl Proto-Oncogene B	Protein Coding	52	GC03M105655	3.277	https://www.genecards.org/cgi-bin/carddisp.pl?gene=CBLB
MIR221	MicroRNA 221	RNA Gene	23	GC0XM045746	3.26283	https://www.genecards.org/cgi-bin/carddisp.pl?gene=MIR221
ADK	Adenosine Kinase	Protein Coding	57	GC10P074244	3.258	https://www.genecards.org/cgi-bin/carddisp.pl?gene=ADK
CD19	CD19 Molecule	Protein Coding	58	GC16P042650	3.25759	https://www.genecards.org/cgi-bin/carddisp.pl?gene=CD19
SCYL1	SCY1 Like Pseudokinase 1	Protein Coding	49	GC11P065525	3.25441	https://www.genecards.org/cgi-bin/carddisp.pl?gene=SCYL1
RPS6	Ribosomal Protein S6	Protein Coding	50	GC09M019375	3.25347	https://www.genecards.org/cgi-bin/carddisp.pl?gene=RPS6
CPEB4	Cytoplasmic Polyadenylation Element Binding Protein 4	Protein Coding	43	GC05P173888	3.24898	https://www.genecards.org/cgi-bin/carddisp.pl?gene=CPEB4
DAXX	Death Domain Associated Protein	Protein Coding	50	GC06M033318	3.24528	https://www.genecards.org/cgi-bin/carddisp.pl?gene=DAXX
RPL11	Ribosomal Protein L11	Protein Coding	55	GC01P023691	3.24232	https://www.genecards.org/cgi-bin/carddisp.pl?gene=RPL11
PRKAA1	Protein Kinase AMP-Activated Catalytic Subunit Alpha 1	Protein Coding	54	GC05M040759	3.23509	https://www.genecards.org/cgi-bin/carddisp.pl?gene=PRKAA1
SOD3	Superoxide Dismutase 3	Protein Coding	50	GC04P024798	3.23435	https://www.genecards.org/cgi-bin/carddisp.pl?gene=SOD3
ID4	Inhibitor Of DNA Binding 4	Protein Coding	46	GC06P019837	3.23419	https://www.genecards.org/cgi-bin/carddisp.pl?gene=ID4
MGAT5	Alpha-1,6-Mannosylglycoprotein 6-Beta-N-Acetylglucosaminyltransferase	Protein Coding	48	GC02P134119	3.23267	https://www.genecards.org/cgi-bin/carddisp.pl?gene=MGAT5
CD1C	CD1c Molecule	Protein Coding	45	GC01P158289	3.23142	https://www.genecards.org/cgi-bin/carddisp.pl?gene=CD1C
TSPO	Translocator Protein	Protein Coding	51	GC22P043151	3.23122	https://www.genecards.org/cgi-bin/carddisp.pl?gene=TSPO
BDNF	Brain Derived Neurotrophic Factor	Protein Coding	56	GC11M027654	3.2301	https://www.genecards.org/cgi-bin/carddisp.pl?gene=BDNF
USO1	USO1 Vesicle Transport Factor	Protein Coding	44	GC04P075724	3.22463	https://www.genecards.org/cgi-bin/carddisp.pl?gene=USO1
S1PR1	Sphingosine-1-Phosphate Receptor 1	Protein Coding	52	GC01P101236	3.22326	https://www.genecards.org/cgi-bin/carddisp.pl?gene=S1PR1
ARPC1B	Actin Related Protein 2/3 Complex Subunit 1B	Protein Coding	50	GC07P099374	3.2228	https://www.genecards.org/cgi-bin/carddisp.pl?gene=ARPC1B
CYP1A1	Cytochrome P450 Family 1 Subfamily A Member 1	Protein Coding	55	GC15M074719	3.21844	https://www.genecards.org/cgi-bin/carddisp.pl?gene=CYP1A1
NEDD4L	NEDD4 Like E3 Ubiquitin Protein Ligase	Protein Coding	52	GC18P058044	3.21802	https://www.genecards.org/cgi-bin/carddisp.pl?gene=NEDD4L
NFKBIZ	NFKB Inhibitor Zeta	Protein Coding	42	GC03P101827	3.21738	https://www.genecards.org/cgi-bin/carddisp.pl?gene=NFKBIZ
CREB3L1	CAMP Responsive Element Binding Protein 3 Like 1	Protein Coding	49	GC11P046655	3.2117	https://www.genecards.org/cgi-bin/carddisp.pl?gene=CREB3L1
ADAM9	ADAM Metallopeptidase Domain 9	Protein Coding	55	GC08P038996	3.21086	https://www.genecards.org/cgi-bin/carddisp.pl?gene=ADAM9
PTGDS	Prostaglandin D2 Synthase	Protein Coding	52	GC09P137169	3.21009	https://www.genecards.org/cgi-bin/carddisp.pl?gene=PTGDS
ZAP70	Zeta Chain Of T Cell Receptor Associated Protein Kinase 70	Protein Coding	59	GC02P097773	3.20893	https://www.genecards.org/cgi-bin/carddisp.pl?gene=ZAP70
MAX	MYC Associated Factor X	Protein Coding	53	GC14M065133	3.20823	https://www.genecards.org/cgi-bin/carddisp.pl?gene=MAX
PDGFC	Platelet Derived Growth Factor C	Protein Coding	50	GC04M156760	3.20669	https://www.genecards.org/cgi-bin/carddisp.pl?gene=PDGFC
ORM1	Orosomucoid 1	Protein Coding	48	GC09P114323	3.20542	https://www.genecards.org/cgi-bin/carddisp.pl?gene=ORM1
MTDH	Metadherin	Protein Coding	47	GC08P097643	3.20451	https://www.genecards.org/cgi-bin/carddisp.pl?gene=MTDH
AREG	Amphiregulin	Protein Coding	50	GC04P074445	3.20382	https://www.genecards.org/cgi-bin/carddisp.pl?gene=AREG
IL13RA2	Interleukin 13 Receptor Subunit Alpha 2	Protein Coding	46	GC0XM115003	3.20315	https://www.genecards.org/cgi-bin/carddisp.pl?gene=IL13RA2
CPEB3	Cytoplasmic Polyadenylation Element Binding Protein 3	Protein Coding	42	GC10M092046	3.20268	https://www.genecards.org/cgi-bin/carddisp.pl?gene=CPEB3
ILF2	Interleukin Enhancer Binding Factor 2	Protein Coding	44	GC01M153661	3.19957	https://www.genecards.org/cgi-bin/carddisp.pl?gene=ILF2
SLC7A5	Solute Carrier Family 7 Member 5	Protein Coding	51	GC16M087830	3.19832	https://www.genecards.org/cgi-bin/carddisp.pl?gene=SLC7A5
CTSE	Cathepsin E	Protein Coding	48	GC01M206009	3.19681	https://www.genecards.org/cgi-bin/carddisp.pl?gene=CTSE
CTCF	CCCTC-Binding Factor	Protein Coding	53	GC16P067563	3.19653	https://www.genecards.org/cgi-bin/carddisp.pl?gene=CTCF
TNFSF4	TNF Superfamily Member 4	Protein Coding	48	GC01M173183	3.19391	https://www.genecards.org/cgi-bin/carddisp.pl?gene=TNFSF4
GBP1	Guanylate Binding Protein 1	Protein Coding	46	GC01M089052	3.19389	https://www.genecards.org/cgi-bin/carddisp.pl?gene=GBP1
NCOA3	Nuclear Receptor Coactivator 3	Protein Coding	54	GC20P047501	3.19179	https://www.genecards.org/cgi-bin/carddisp.pl?gene=NCOA3
CD244	CD244 Molecule	Protein Coding	50	GC01M160830	3.19117	https://www.genecards.org/cgi-bin/carddisp.pl?gene=CD244
TRIB3	Tribbles Pseudokinase 3	Protein Coding	50	GC20P000361	3.18236	https://www.genecards.org/cgi-bin/carddisp.pl?gene=TRIB3
MOK	MOK Protein Kinase	Protein Coding	43	GC14M102214	3.17949	https://www.genecards.org/cgi-bin/carddisp.pl?gene=MOK
ETV7	ETS Variant Transcription Factor 7	Protein Coding	40	GC06M071871	3.16704	https://www.genecards.org/cgi-bin/carddisp.pl?gene=ETV7
TP73	Tumor Protein P73	Protein Coding	52	GC01P003652	3.16379	https://www.genecards.org/cgi-bin/carddisp.pl?gene=TP73
MIR27A	MicroRNA 27a	RNA Gene	26	GC19M014656	3.16176	https://www.genecards.org/cgi-bin/carddisp.pl?gene=MIR27A
NRIP1	Nuclear Receptor Interacting Protein 1	Protein Coding	50	GC21M014961	3.15904	https://www.genecards.org/cgi-bin/carddisp.pl?gene=NRIP1
PSIP1	PC4 And SRSF1 Interacting Protein 1	Protein Coding	47	GC09M015464	3.1581	https://www.genecards.org/cgi-bin/carddisp.pl?gene=PSIP1
SIGLEC9	Sialic Acid Binding Ig Like Lectin 9	Protein Coding	44	GC19P073317	3.15617	https://www.genecards.org/cgi-bin/carddisp.pl?gene=SIGLEC9
COLEC12	Collectin Subfamily Member 12	Protein Coding	46	GC18M000318	3.15577	https://www.genecards.org/cgi-bin/carddisp.pl?gene=COLEC12
SLC16A1	Solute Carrier Family 16 Member 1	Protein Coding	54	GC01M113013	3.15406	https://www.genecards.org/cgi-bin/carddisp.pl?gene=SLC16A1
THBD	Thrombomodulin	Protein Coding	53	GC20M023026	3.15368	https://www.genecards.org/cgi-bin/carddisp.pl?gene=THBD
CD1D	CD1d Molecule	Protein Coding	50	GC01P158178	3.15178	https://www.genecards.org/cgi-bin/carddisp.pl?gene=CD1D
GRPR	Gastrin Releasing Peptide Receptor	Protein Coding	50	GC0XP016141	3.15064	https://www.genecards.org/cgi-bin/carddisp.pl?gene=GRPR
FGF7	Fibroblast Growth Factor 7	Protein Coding	50	GC15P049423	3.15002	https://www.genecards.org/cgi-bin/carddisp.pl?gene=FGF7
MUC2	Mucin 2, Oligomeric Mucus/Gel-Forming	Protein Coding	44	GC11P001074	3.14908	https://www.genecards.org/cgi-bin/carddisp.pl?gene=MUC2
S100A7	S100 Calcium Binding Protein A7	Protein Coding	46	GC01M153457	3.14425	https://www.genecards.org/cgi-bin/carddisp.pl?gene=S100A7
KPNA4	Karyopherin Subunit Alpha 4	Protein Coding	47	GC03M160494	3.14316	https://www.genecards.org/cgi-bin/carddisp.pl?gene=KPNA4
SMARCA4	SWI/SNF Related, Matrix Associated, Actin Dependent Regulator Of Chromatin, Subfamily A, Member 4	Protein Coding	57	GC19P010932	3.13715	https://www.genecards.org/cgi-bin/carddisp.pl?gene=SMARCA4
PKN2	Protein Kinase N2	Protein Coding	52	GC01P088684	3.1366	https://www.genecards.org/cgi-bin/carddisp.pl?gene=PKN2
DEFB4A	Defensin Beta 4A	Protein Coding	42	GC08P007900	3.13321	https://www.genecards.org/cgi-bin/carddisp.pl?gene=DEFB4A
CD79A	CD79a Molecule	Protein Coding	55	GC19P041877	3.13175	https://www.genecards.org/cgi-bin/carddisp.pl?gene=CD79A
MAGEA3	MAGE Family Member A3	Protein Coding	43	GC0XP152698	3.12743	https://www.genecards.org/cgi-bin/carddisp.pl?gene=MAGEA3
RAB11A	RAB11A, Member RAS Oncogene Family	Protein Coding	52	GC15P123392	3.12703	https://www.genecards.org/cgi-bin/carddisp.pl?gene=RAB11A
S100A1	S100 Calcium Binding Protein A1	Protein Coding	47	GC01P153627	3.12698	https://www.genecards.org/cgi-bin/carddisp.pl?gene=S100A1
HMGN2	High Mobility Group Nucleosomal Binding Domain 2	Protein Coding	46	GC01P026473	3.12641	https://www.genecards.org/cgi-bin/carddisp.pl?gene=HMGN2
THOC5	THO Complex Subunit 5	Protein Coding	43	GC22M029505	3.12575	https://www.genecards.org/cgi-bin/carddisp.pl?gene=THOC5
RASA1	RAS P21 Protein Activator 1	Protein Coding	52	GC05P087267	3.1255	https://www.genecards.org/cgi-bin/carddisp.pl?gene=RASA1
XBP1	X-Box Binding Protein 1	Protein Coding	52	GC22M028794	3.12484	https://www.genecards.org/cgi-bin/carddisp.pl?gene=XBP1
NLRP7	NLR Family Pyrin Domain Containing 7	Protein Coding	49	GC19M054923	3.12358	https://www.genecards.org/cgi-bin/carddisp.pl?gene=NLRP7
ASAP1	ArfGAP With SH3 Domain, Ankyrin Repeat And PH Domain 1	Protein Coding	47	GC08M130052	3.12215	https://www.genecards.org/cgi-bin/carddisp.pl?gene=ASAP1
DICER1	Dicer 1, Ribonuclease III	Protein Coding	56	GC14M095086	3.12132	https://www.genecards.org/cgi-bin/carddisp.pl?gene=DICER1
PVR	PVR Cell Adhesion Molecule	Protein Coding	52	GC19P073043	3.11929	https://www.genecards.org/cgi-bin/carddisp.pl?gene=PVR
ST6GALNAC1	ST6 N-Acetylgalactosaminide Alpha-2,6-Sialyltransferase 1	Protein Coding	46	GC17M076624	3.11797	https://www.genecards.org/cgi-bin/carddisp.pl?gene=ST6GALNAC1
RIPK3	Receptor Interacting Serine/Threonine Kinase 3	Protein Coding	50	GC14M024336	3.11747	https://www.genecards.org/cgi-bin/carddisp.pl?gene=RIPK3
DLST	Dihydrolipoamide S-Succinyltransferase	Protein Coding	52	GC14P074881	3.11685	https://www.genecards.org/cgi-bin/carddisp.pl?gene=DLST
CCNB1	Cyclin B1	Protein Coding	53	GC05P069167	3.11495	https://www.genecards.org/cgi-bin/carddisp.pl?gene=CCNB1
SLIT2	Slit Guidance Ligand 2	Protein Coding	52	GC04P020321	3.11481	https://www.genecards.org/cgi-bin/carddisp.pl?gene=SLIT2
HSD17B11	Hydroxysteroid 17-Beta Dehydrogenase 11	Protein Coding	44	GC04M087336	3.11236	https://www.genecards.org/cgi-bin/carddisp.pl?gene=HSD17B11
MEN1	Menin 1	Protein Coding	51	GC11M064803	3.11156	https://www.genecards.org/cgi-bin/carddisp.pl?gene=MEN1
POU5F1	POU Class 5 Homeobox 1	Protein Coding	51	GC06M071676	3.10868	https://www.genecards.org/cgi-bin/carddisp.pl?gene=POU5F1
CDK1	Cyclin Dependent Kinase 1	Protein Coding	54	GC10P060772	3.10694	https://www.genecards.org/cgi-bin/carddisp.pl?gene=CDK1
NR5A2	Nuclear Receptor Subfamily 5 Group A Member 2	Protein Coding	51	GC01P199996	3.10652	https://www.genecards.org/cgi-bin/carddisp.pl?gene=NR5A2
H2AC21	H2A Clustered Histone 21	Protein Coding	37	GC01M152700	3.10542	https://www.genecards.org/cgi-bin/carddisp.pl?gene=H2AC21
IGHE	Immunoglobulin Heavy Constant Epsilon	Protein Coding	36	GC14M113319	3.10118	https://www.genecards.org/cgi-bin/carddisp.pl?gene=IGHE
RNLS	Renalase, FAD Dependent Amine Oxidase	Protein Coding	45	GC10M088180	3.10001	https://www.genecards.org/cgi-bin/carddisp.pl?gene=RNLS
HAS2	Hyaluronan Synthase 2	Protein Coding	47	GC08M121594	3.09969	https://www.genecards.org/cgi-bin/carddisp.pl?gene=HAS2
ANGPTL4	Angiopoietin Like 4	Protein Coding	52	GC19P008363	3.0972	https://www.genecards.org/cgi-bin/carddisp.pl?gene=ANGPTL4
DDIT3	DNA Damage Inducible Transcript 3	Protein Coding	52	GC12M057516	3.09589	https://www.genecards.org/cgi-bin/carddisp.pl?gene=DDIT3
TAPBP	TAP Binding Protein	Protein Coding	51	GC06M033299	3.09533	https://www.genecards.org/cgi-bin/carddisp.pl?gene=TAPBP
VIPR1	Vasoactive Intestinal Peptide Receptor 1	Protein Coding	52	GC03P042490	3.09296	https://www.genecards.org/cgi-bin/carddisp.pl?gene=VIPR1
HOPX	HOP Homeobox	Protein Coding	41	GC04M056647	3.09188	https://www.genecards.org/cgi-bin/carddisp.pl?gene=HOPX
TNFRSF9	TNF Receptor Superfamily Member 9	Protein Coding	50	GC01M007915	3.09026	https://www.genecards.org/cgi-bin/carddisp.pl?gene=TNFRSF9
NEDD9	Neural Precursor Cell Expressed, Developmentally Down-Regulated 9	Protein Coding	48	GC06M011183	3.08236	https://www.genecards.org/cgi-bin/carddisp.pl?gene=NEDD9
BST2	Bone Marrow Stromal Cell Antigen 2	Protein Coding	46	GC19M017403	3.07754	https://www.genecards.org/cgi-bin/carddisp.pl?gene=BST2
FGFR2	Fibroblast Growth Factor Receptor 2	Protein Coding	63	GC10M121478	3.07546	https://www.genecards.org/cgi-bin/carddisp.pl?gene=FGFR2
ATF1	Activating Transcription Factor 1	Protein Coding	52	GC12P050763	3.0733	https://www.genecards.org/cgi-bin/carddisp.pl?gene=ATF1
CDK2	Cyclin Dependent Kinase 2	Protein Coding	58	GC12P055966	3.07118	https://www.genecards.org/cgi-bin/carddisp.pl?gene=CDK2
NRG1	Neuregulin 1	Protein Coding	55	GC08P031639	3.07009	https://www.genecards.org/cgi-bin/carddisp.pl?gene=NRG1
AZU1	Azurocidin 1	Protein Coding	46	GC19P000825	3.06993	https://www.genecards.org/cgi-bin/carddisp.pl?gene=AZU1
CYP1B1	Cytochrome P450 Family 1 Subfamily B Member 1	Protein Coding	54	GC02M038066	3.06987	https://www.genecards.org/cgi-bin/carddisp.pl?gene=CYP1B1
C3AR1	Complement C3a Receptor 1	Protein Coding	50	GC12M008059	3.0696	https://www.genecards.org/cgi-bin/carddisp.pl?gene=C3AR1
APEX1	Apurinic/Apyrimidinic Endodeoxyribonuclease 1	Protein Coding	52	GC14P020455	3.06766	https://www.genecards.org/cgi-bin/carddisp.pl?gene=APEX1
PTMA	Prothymosin Alpha	Protein Coding	48	GC02P231838	3.06229	https://www.genecards.org/cgi-bin/carddisp.pl?gene=PTMA
S100A4	S100 Calcium Binding Protein A4	Protein Coding	52	GC01M153543	3.06151	https://www.genecards.org/cgi-bin/carddisp.pl?gene=S100A4
SOX4	SRY-Box Transcription Factor 4	Protein Coding	50	GC06P021593	3.06118	https://www.genecards.org/cgi-bin/carddisp.pl?gene=SOX4
RNASEL	Ribonuclease L	Protein Coding	50	GC01M182573	3.05936	https://www.genecards.org/cgi-bin/carddisp.pl?gene=RNASEL
RACK1	Receptor For Activated C Kinase 1	Protein Coding	50	GC05M181933	3.05851	https://www.genecards.org/cgi-bin/carddisp.pl?gene=RACK1
POMC	Proopiomelanocortin	Protein Coding	55	GC02M025160	3.05559	https://www.genecards.org/cgi-bin/carddisp.pl?gene=POMC
CXCR5	C-X-C Motif Chemokine Receptor 5	Protein Coding	48	GC11P118928	3.04815	https://www.genecards.org/cgi-bin/carddisp.pl?gene=CXCR5
KMT2A	Lysine Methyltransferase 2A	Protein Coding	54	GC11P118436	3.04796	https://www.genecards.org/cgi-bin/carddisp.pl?gene=KMT2A
MPP1	MAGUK P55 Scaffold Protein 1	Protein Coding	46	GC0XM154779	3.04508	https://www.genecards.org/cgi-bin/carddisp.pl?gene=MPP1
GGT1	Gamma-Glutamyltransferase 1	Protein Coding	56	GC22P024583	3.04325	https://www.genecards.org/cgi-bin/carddisp.pl?gene=GGT1
BTBD9	BTB Domain Containing 9	Protein Coding	42	GC06M038168	3.03655	https://www.genecards.org/cgi-bin/carddisp.pl?gene=BTBD9
NLRP12	NLR Family Pyrin Domain Containing 12	Protein Coding	51	GC19M053793	3.03411	https://www.genecards.org/cgi-bin/carddisp.pl?gene=NLRP12
VTN	Vitronectin	Protein Coding	51	GC17M051189	3.0321	https://www.genecards.org/cgi-bin/carddisp.pl?gene=VTN
TNFRSF10A	TNF Receptor Superfamily Member 10a	Protein Coding	52	GC08M023190	3.03178	https://www.genecards.org/cgi-bin/carddisp.pl?gene=TNFRSF10A
ISG15	ISG15 Ubiquitin Like Modifier	Protein Coding	53	GC01P001001	3.02123	https://www.genecards.org/cgi-bin/carddisp.pl?gene=ISG15
PCCB	Propionyl-CoA Carboxylase Subunit Beta	Protein Coding	53	GC03P136250	3.01974	https://www.genecards.org/cgi-bin/carddisp.pl?gene=PCCB
RASA2	RAS P21 Protein Activator 2	Protein Coding	46	GC03P141487	3.01949	https://www.genecards.org/cgi-bin/carddisp.pl?gene=RASA2
GSTO1	Glutathione S-Transferase Omega 1	Protein Coding	52	GC10P104235	3.01935	https://www.genecards.org/cgi-bin/carddisp.pl?gene=GSTO1
IGFBP2	Insulin Like Growth Factor Binding Protein 2	Protein Coding	51	GC02P216632	3.01789	https://www.genecards.org/cgi-bin/carddisp.pl?gene=IGFBP2
PAK2	P21 (RAC1) Activated Kinase 2	Protein Coding	55	GC03P196739	3.01503	https://www.genecards.org/cgi-bin/carddisp.pl?gene=PAK2
UTP18	UTP18 Small Subunit Processome Component	Protein Coding	41	GC17P051260	3.0148	https://www.genecards.org/cgi-bin/carddisp.pl?gene=UTP18
PRKAR1A	Protein Kinase CAMP-Dependent Type I Regulatory Subunit Alpha	Protein Coding	57	GC17P069214	3.0123	https://www.genecards.org/cgi-bin/carddisp.pl?gene=PRKAR1A
SRRT	Serrate, RNA Effector Molecule	Protein Coding	45	GC07P100875	3.01228	https://www.genecards.org/cgi-bin/carddisp.pl?gene=SRRT
KLK3	Kallikrein Related Peptidase 3	Protein Coding	53	GC19P050854	3.01107	https://www.genecards.org/cgi-bin/carddisp.pl?gene=KLK3
MIR34A	MicroRNA 34a	RNA Gene	25	GC01M009154	3.00546	https://www.genecards.org/cgi-bin/carddisp.pl?gene=MIR34A
CASP6	Caspase 6	Protein Coding	55	GC04M109688	3.00452	https://www.genecards.org/cgi-bin/carddisp.pl?gene=CASP6
GCNT1	Glucosaminyl (N-Acetyl) Transferase 1	Protein Coding	47	GC09P076420	2.99985	https://www.genecards.org/cgi-bin/carddisp.pl?gene=GCNT1
HNRNPH1	Heterogeneous Nuclear Ribonucleoprotein H1	Protein Coding	48	GC05M179614	2.99837	https://www.genecards.org/cgi-bin/carddisp.pl?gene=HNRNPH1
TRAF5	TNF Receptor Associated Factor 5	Protein Coding	47	GC01P211326	2.99779	https://www.genecards.org/cgi-bin/carddisp.pl?gene=TRAF5
SP3	Sp3 Transcription Factor	Protein Coding	50	GC02M173882	2.99619	https://www.genecards.org/cgi-bin/carddisp.pl?gene=SP3
ACTL7B	Actin Like 7B	Protein Coding	41	GC09M108854	2.99007	https://www.genecards.org/cgi-bin/carddisp.pl?gene=ACTL7B
CEBPE	CCAAT Enhancer Binding Protein Epsilon	Protein Coding	49	GC14M023117	2.9892	https://www.genecards.org/cgi-bin/carddisp.pl?gene=CEBPE
PTN	Pleiotrophin	Protein Coding	47	GC07M137227	2.98808	https://www.genecards.org/cgi-bin/carddisp.pl?gene=PTN
GDNF	Glial Cell Derived Neurotrophic Factor	Protein Coding	56	GC05M037812	2.98728	https://www.genecards.org/cgi-bin/carddisp.pl?gene=GDNF
METTL3	Methyltransferase 3, N6-Adenosine-Methyltransferase Complex Catalytic Subunit	Protein Coding	48	GC14M021498	2.98134	https://www.genecards.org/cgi-bin/carddisp.pl?gene=METTL3
KHDRBS1	KH RNA Binding Domain Containing, Signal Transduction Associated 1	Protein Coding	47	GC01P032013	2.98052	https://www.genecards.org/cgi-bin/carddisp.pl?gene=KHDRBS1
VSIR	V-Set Immunoregulatory Receptor	Protein Coding	47	GC10M071748	2.98047	https://www.genecards.org/cgi-bin/carddisp.pl?gene=VSIR
SLC1A3	Solute Carrier Family 1 Member 3	Protein Coding	56	GC05P036654	2.98013	https://www.genecards.org/cgi-bin/carddisp.pl?gene=SLC1A3
RUNX3	RUNX Family Transcription Factor 3	Protein Coding	50	GC01M024899	2.98013	https://www.genecards.org/cgi-bin/carddisp.pl?gene=RUNX3
POSTN	Periostin	Protein Coding	50	GC13M037562	2.9794	https://www.genecards.org/cgi-bin/carddisp.pl?gene=POSTN
SST	Somatostatin	Protein Coding	47	GC03M187668	2.97697	https://www.genecards.org/cgi-bin/carddisp.pl?gene=SST
PPIB	Peptidylprolyl Isomerase B	Protein Coding	57	GC15M064155	2.97674	https://www.genecards.org/cgi-bin/carddisp.pl?gene=PPIB
ANXA4	Annexin A4	Protein Coding	48	GC02P069644	2.97646	https://www.genecards.org/cgi-bin/carddisp.pl?gene=ANXA4
ST3GAL1	ST3 Beta-Galactoside Alpha-2,3-Sialyltransferase 1	Protein Coding	50	GC08M133454	2.97398	https://www.genecards.org/cgi-bin/carddisp.pl?gene=ST3GAL1
RPL13	Ribosomal Protein L13	Protein Coding	50	GC16P091591	2.96913	https://www.genecards.org/cgi-bin/carddisp.pl?gene=RPL13
RPL7A	Ribosomal Protein L7a	Protein Coding	48	GC09P133348	2.96568	https://www.genecards.org/cgi-bin/carddisp.pl?gene=RPL7A
ERG	ETS Transcription Factor ERG	Protein Coding	53	GC21M038367	2.96267	https://www.genecards.org/cgi-bin/carddisp.pl?gene=ERG
A2ML1	Alpha-2-Macroglobulin Like 1	Protein Coding	46	GC12P008822	2.96232	https://www.genecards.org/cgi-bin/carddisp.pl?gene=A2ML1
HSF1	Heat Shock Transcription Factor 1	Protein Coding	53	GC08P144291	2.96069	https://www.genecards.org/cgi-bin/carddisp.pl?gene=HSF1
FLNB	Filamin B	Protein Coding	54	GC03P058008	2.96008	https://www.genecards.org/cgi-bin/carddisp.pl?gene=FLNB
HPGD	15-Hydroxyprostaglandin Dehydrogenase	Protein Coding	53	GC04M174490	2.95608	https://www.genecards.org/cgi-bin/carddisp.pl?gene=HPGD
HSPA1A	Heat Shock Protein Family A (Hsp70) Member 1A	Protein Coding	53	GC06P092171	2.95506	https://www.genecards.org/cgi-bin/carddisp.pl?gene=HSPA1A
MLXIPL	MLX Interacting Protein Like	Protein Coding	50	GC07M073593	2.95391	https://www.genecards.org/cgi-bin/carddisp.pl?gene=MLXIPL
CCN4	Cellular Communication Network Factor 4	Protein Coding	46	GC08P133192	2.9531	https://www.genecards.org/cgi-bin/carddisp.pl?gene=CCN4
NFKB2	Nuclear Factor Kappa B Subunit 2	Protein Coding	59	GC10P102394	2.95192	https://www.genecards.org/cgi-bin/carddisp.pl?gene=NFKB2
DAPK1	Death Associated Protein Kinase 1	Protein Coding	56	GC09P087497	2.95176	https://www.genecards.org/cgi-bin/carddisp.pl?gene=DAPK1
KRT17	Keratin 17	Protein Coding	51	GC17M041619	2.94809	https://www.genecards.org/cgi-bin/carddisp.pl?gene=KRT17
RHOC	Ras Homolog Family Member C	Protein Coding	48	GC01M112701	2.94802	https://www.genecards.org/cgi-bin/carddisp.pl?gene=RHOC
ATF6	Activating Transcription Factor 6	Protein Coding	55	GC01P161766	2.94714	https://www.genecards.org/cgi-bin/carddisp.pl?gene=ATF6
CDH5	Cadherin 5	Protein Coding	52	GC16P066366	2.94621	https://www.genecards.org/cgi-bin/carddisp.pl?gene=CDH5
MIR222	MicroRNA 222	RNA Gene	23	GC0XM045747	2.94081	https://www.genecards.org/cgi-bin/carddisp.pl?gene=MIR222
RECK	Reversion Inducing Cysteine Rich Protein With Kazal Motifs	Protein Coding	47	GC09P036036	2.94024	https://www.genecards.org/cgi-bin/carddisp.pl?gene=RECK
SAP30BP	SAP30 Binding Protein	Protein Coding	44	GC17P075667	2.9386	https://www.genecards.org/cgi-bin/carddisp.pl?gene=SAP30BP
HNRNPR	Heterogeneous Nuclear Ribonucleoprotein R	Protein Coding	47	GC01M023303	2.93838	https://www.genecards.org/cgi-bin/carddisp.pl?gene=HNRNPR
BTK	Bruton Tyrosine Kinase	Protein Coding	60	GC0XM101349	2.93679	https://www.genecards.org/cgi-bin/carddisp.pl?gene=BTK
SRSF7	Serine And Arginine Rich Splicing Factor 7	Protein Coding	47	GC02M038743	2.93485	https://www.genecards.org/cgi-bin/carddisp.pl?gene=SRSF7
MBNL1	Muscleblind Like Splicing Regulator 1	Protein Coding	46	GC03P152243	2.93288	https://www.genecards.org/cgi-bin/carddisp.pl?gene=MBNL1
H4C16	H4 Histone 16	Protein Coding	42	GC12M022801	2.93152	https://www.genecards.org/cgi-bin/carddisp.pl?gene=H4C16
RPL3	Ribosomal Protein L3	Protein Coding	48	GC22M061482	2.93097	https://www.genecards.org/cgi-bin/carddisp.pl?gene=RPL3
MIR138-1	MicroRNA 138-1	RNA Gene	23	GC03P044115	2.93007	https://www.genecards.org/cgi-bin/carddisp.pl?gene=MIR138-1
ADORA3	Adenosine A3 Receptor	Protein Coding	52	GC01M111499	2.92986	https://www.genecards.org/cgi-bin/carddisp.pl?gene=ADORA3
IGF2	Insulin Like Growth Factor 2	Protein Coding	55	GC11M004506	2.92666	https://www.genecards.org/cgi-bin/carddisp.pl?gene=IGF2
EIF4A3	Eukaryotic Translation Initiation Factor 4A3	Protein Coding	50	GC17M080135	2.92638	https://www.genecards.org/cgi-bin/carddisp.pl?gene=EIF4A3
CTNNA1	Catenin Alpha 1	Protein Coding	52	GC05P138613	2.92232	https://www.genecards.org/cgi-bin/carddisp.pl?gene=CTNNA1
SPRY2	Sprouty RTK Signaling Antagonist 2	Protein Coding	52	GC13M080335	2.91932	https://www.genecards.org/cgi-bin/carddisp.pl?gene=SPRY2
TRPA1	Transient Receptor Potential Cation Channel Subfamily A Member 1	Protein Coding	53	GC08M072019	2.91766	https://www.genecards.org/cgi-bin/carddisp.pl?gene=TRPA1
SDHB	Succinate Dehydrogenase Complex Iron Sulfur Subunit B	Protein Coding	54	GC01M018297	2.91701	https://www.genecards.org/cgi-bin/carddisp.pl?gene=SDHB
CDK12	Cyclin Dependent Kinase 12	Protein Coding	52	GC17P039461	2.91628	https://www.genecards.org/cgi-bin/carddisp.pl?gene=CDK12
DES	Desmin	Protein Coding	55	GC02P219418	2.91624	https://www.genecards.org/cgi-bin/carddisp.pl?gene=DES
F2	Coagulation Factor II, Thrombin	Protein Coding	56	GC11P046720	2.91558	https://www.genecards.org/cgi-bin/carddisp.pl?gene=F2
DDX39A	DExD-Box Helicase 39A	Protein Coding	45	GC19M014408	2.91272	https://www.genecards.org/cgi-bin/carddisp.pl?gene=DDX39A
ROCK1	Rho Associated Coiled-Coil Containing Protein Kinase 1	Protein Coding	56	GC18M020946	2.91241	https://www.genecards.org/cgi-bin/carddisp.pl?gene=ROCK1
C1QBP	Complement C1q Binding Protein	Protein Coding	51	GC17M005432	2.9122	https://www.genecards.org/cgi-bin/carddisp.pl?gene=C1QBP
NTRK2	Neurotrophic Receptor Tyrosine Kinase 2	Protein Coding	60	GC09P084668	2.91205	https://www.genecards.org/cgi-bin/carddisp.pl?gene=NTRK2
CLU	Clusterin	Protein Coding	54	GC08M027596	2.91173	https://www.genecards.org/cgi-bin/carddisp.pl?gene=CLU
TLE1	TLE Family Member 1, Transcriptional Corepressor	Protein Coding	51	GC09M081583	2.90681	https://www.genecards.org/cgi-bin/carddisp.pl?gene=TLE1
ATXN2	Ataxin 2	Protein Coding	50	GC12M111443	2.90537	https://www.genecards.org/cgi-bin/carddisp.pl?gene=ATXN2
TNFAIP8L2	TNF Alpha Induced Protein 8 Like 2	Protein Coding	38	GC01P151156	2.90318	https://www.genecards.org/cgi-bin/carddisp.pl?gene=TNFAIP8L2
RDX	Radixin	Protein Coding	53	GC11M109864	2.90066	https://www.genecards.org/cgi-bin/carddisp.pl?gene=RDX
P2RY12	Purinergic Receptor P2Y12	Protein Coding	55	GC03M151336	2.89968	https://www.genecards.org/cgi-bin/carddisp.pl?gene=P2RY12
PML	PML Nuclear Body Scaffold	Protein Coding	53	GC15P073994	2.89623	https://www.genecards.org/cgi-bin/carddisp.pl?gene=PML
EGLN3	Egl-9 Family Hypoxia Inducible Factor 3	Protein Coding	52	GC14M033924	2.89586	https://www.genecards.org/cgi-bin/carddisp.pl?gene=EGLN3
KLF3	KLF Transcription Factor 3	Protein Coding	44	GC04P038668	2.89504	https://www.genecards.org/cgi-bin/carddisp.pl?gene=KLF3
ZFYVE26	Zinc Finger FYVE-Type Containing 26	Protein Coding	47	GC14M067727	2.8878	https://www.genecards.org/cgi-bin/carddisp.pl?gene=ZFYVE26
MTA1	Metastasis Associated 1	Protein Coding	50	GC14P105419	2.88693	https://www.genecards.org/cgi-bin/carddisp.pl?gene=MTA1
EGLN1	Egl-9 Family Hypoxia Inducible Factor 1	Protein Coding	56	GC01M231363	2.88587	https://www.genecards.org/cgi-bin/carddisp.pl?gene=EGLN1
NTRK3	Neurotrophic Receptor Tyrosine Kinase 3	Protein Coding	59	GC15M087859	2.88492	https://www.genecards.org/cgi-bin/carddisp.pl?gene=NTRK3
ASH1L	ASH1 Like Histone Lysine Methyltransferase	Protein Coding	45	GC01M155335	2.88439	https://www.genecards.org/cgi-bin/carddisp.pl?gene=ASH1L
GNAS	GNAS Complex Locus	Protein Coding	56	GC20P058839	2.88359	https://www.genecards.org/cgi-bin/carddisp.pl?gene=GNAS
BAD	BCL2 Associated Agonist Of Cell Death	Protein Coding	51	GC11M099650	2.88294	https://www.genecards.org/cgi-bin/carddisp.pl?gene=BAD
LZTR1	Leucine Zipper Like Transcription Regulator 1	Protein Coding	50	GC22P044439	2.8762	https://www.genecards.org/cgi-bin/carddisp.pl?gene=LZTR1
DROSHA	Drosha Ribonuclease III	Protein Coding	51	GC05M031401	2.87567	https://www.genecards.org/cgi-bin/carddisp.pl?gene=DROSHA
FOXD1	Forkhead Box D1	Protein Coding	42	GC05M073444	2.8732	https://www.genecards.org/cgi-bin/carddisp.pl?gene=FOXD1
PIGR	Polymeric Immunoglobulin Receptor	Protein Coding	48	GC01M206928	2.8729	https://www.genecards.org/cgi-bin/carddisp.pl?gene=PIGR
CHRNA7	Cholinergic Receptor Nicotinic Alpha 7 Subunit	Protein Coding	52	GC15P031923	2.87187	https://www.genecards.org/cgi-bin/carddisp.pl?gene=CHRNA7
WWTR1	WW Domain Containing Transcription Regulator 1	Protein Coding	46	GC03M149517	2.8703	https://www.genecards.org/cgi-bin/carddisp.pl?gene=WWTR1
PRDX2	Peroxiredoxin 2	Protein Coding	52	GC19M012796	2.86791	https://www.genecards.org/cgi-bin/carddisp.pl?gene=PRDX2
MMP11	Matrix Metallopeptidase 11	Protein Coding	51	GC22P023768	2.86614	https://www.genecards.org/cgi-bin/carddisp.pl?gene=MMP11
SPRED1	Sprouty Related EVH1 Domain Containing 1	Protein Coding	49	GC15P038252	2.86572	https://www.genecards.org/cgi-bin/carddisp.pl?gene=SPRED1
USP10	Ubiquitin Specific Peptidase 10	Protein Coding	50	GC16P084702	2.86472	https://www.genecards.org/cgi-bin/carddisp.pl?gene=USP10
RBL1	RB Transcriptional Corepressor Like 1	Protein Coding	48	GC20M036996	2.86411	https://www.genecards.org/cgi-bin/carddisp.pl?gene=RBL1
RPL6	Ribosomal Protein L6	Protein Coding	46	GC12M112320	2.86151	https://www.genecards.org/cgi-bin/carddisp.pl?gene=RPL6
PRSS23	Serine Protease 23	Protein Coding	47	GC11P086791	2.86006	https://www.genecards.org/cgi-bin/carddisp.pl?gene=PRSS23
ANXA11	Annexin A11	Protein Coding	50	GC10M080150	2.85952	https://www.genecards.org/cgi-bin/carddisp.pl?gene=ANXA11
PPIA	Peptidylprolyl Isomerase A	Protein Coding	52	GC07P044811	2.85675	https://www.genecards.org/cgi-bin/carddisp.pl?gene=PPIA
EIF4ENIF1	Eukaryotic Translation Initiation Factor 4E Nuclear Import Factor 1	Protein Coding	43	GC22M031436	2.85377	https://www.genecards.org/cgi-bin/carddisp.pl?gene=EIF4ENIF1
PDP1	Pyruvate Dehydrogenase Phosphatase Catalytic Subunit 1	Protein Coding	54	GC08P093857	2.85293	https://www.genecards.org/cgi-bin/carddisp.pl?gene=PDP1
TERC	Telomerase RNA Component	RNA Gene	31	GC03M169765	2.8516	https://www.genecards.org/cgi-bin/carddisp.pl?gene=TERC
IFI27	Interferon Alpha Inducible Protein 27	Protein Coding	44	GC14P094104	2.8497	https://www.genecards.org/cgi-bin/carddisp.pl?gene=IFI27
GNA13	G Protein Subunit Alpha 13	Protein Coding	50	GC17M065009	2.84671	https://www.genecards.org/cgi-bin/carddisp.pl?gene=GNA13
ARHGEF2	Rho/Rac Guanine Nucleotide Exchange Factor 2	Protein Coding	52	GC01M155946	2.8457	https://www.genecards.org/cgi-bin/carddisp.pl?gene=ARHGEF2
FURIN	Furin, Paired Basic Amino Acid Cleaving Enzyme	Protein Coding	54	GC15P090868	2.84463	https://www.genecards.org/cgi-bin/carddisp.pl?gene=FURIN
BMP7	Bone Morphogenetic Protein 7	Protein Coding	52	GC20M057168	2.84441	https://www.genecards.org/cgi-bin/carddisp.pl?gene=BMP7
MIR33A	MicroRNA 33a	RNA Gene	22	GC22P041900	2.84308	https://www.genecards.org/cgi-bin/carddisp.pl?gene=MIR33A
HHLA2	HERV-H LTR-Associating 2	Protein Coding	41	GC03P108296	2.84286	https://www.genecards.org/cgi-bin/carddisp.pl?gene=HHLA2
NOTCH2	Notch Receptor 2	Protein Coding	59	GC01M119911	2.83962	https://www.genecards.org/cgi-bin/carddisp.pl?gene=NOTCH2
DUSP6	Dual Specificity Phosphatase 6	Protein Coding	55	GC12M089347	2.83811	https://www.genecards.org/cgi-bin/carddisp.pl?gene=DUSP6
CLEC3B	C-Type Lectin Domain Family 3 Member B	Protein Coding	48	GC03P047587	2.83589	https://www.genecards.org/cgi-bin/carddisp.pl?gene=CLEC3B
PRAME	PRAME Nuclear Receptor Transcriptional Regulator	Protein Coding	44	GC22M022547	2.83511	https://www.genecards.org/cgi-bin/carddisp.pl?gene=PRAME
ELK4	ETS Transcription Factor ELK4	Protein Coding	42	GC01M205598	2.83229	https://www.genecards.org/cgi-bin/carddisp.pl?gene=ELK4
F2RL2	Coagulation Factor II Thrombin Receptor Like 2	Protein Coding	47	GC05M076615	2.83068	https://www.genecards.org/cgi-bin/carddisp.pl?gene=F2RL2
FUT2	Fucosyltransferase 2	Protein Coding	52	GC19P048695	2.82928	https://www.genecards.org/cgi-bin/carddisp.pl?gene=FUT2
H2AC18	H2A Clustered Histone 18	Protein Coding	35	GC01M152688	2.8282	https://www.genecards.org/cgi-bin/carddisp.pl?gene=H2AC18
ROCK2	Rho Associated Coiled-Coil Containing Protein Kinase 2	Protein Coding	53	GC02M011331	2.82406	https://www.genecards.org/cgi-bin/carddisp.pl?gene=ROCK2
PRPF6	Pre-MRNA Processing Factor 6	Protein Coding	48	GC20P063981	2.8229	https://www.genecards.org/cgi-bin/carddisp.pl?gene=PRPF6
PTGER3	Prostaglandin E Receptor 3	Protein Coding	53	GC01M070852	2.8206	https://www.genecards.org/cgi-bin/carddisp.pl?gene=PTGER3
TP63	Tumor Protein P63	Protein Coding	53	GC03P189598	2.81896	https://www.genecards.org/cgi-bin/carddisp.pl?gene=TP63
TRA	T Cell Receptor Alpha Locus	Protein Coding	24	GC14P021621	2.81894	https://www.genecards.org/cgi-bin/carddisp.pl?gene=TRA
NT5DC2	5'-Nucleotidase Domain Containing 2	Protein Coding	42	GC03M052524	2.81819	https://www.genecards.org/cgi-bin/carddisp.pl?gene=NT5DC2
PRPF8	Pre-MRNA Processing Factor 8	Protein Coding	49	GC17M001650	2.81709	https://www.genecards.org/cgi-bin/carddisp.pl?gene=PRPF8
IL31	Interleukin 31	Protein Coding	43	GC12M122496	2.81656	https://www.genecards.org/cgi-bin/carddisp.pl?gene=IL31
WDR82	WD Repeat Domain 82	Protein Coding	43	GC03M052254	2.8144	https://www.genecards.org/cgi-bin/carddisp.pl?gene=WDR82
UBR5	Ubiquitin Protein Ligase E3 Component N-Recognin 5	Protein Coding	47	GC08M102252	2.81337	https://www.genecards.org/cgi-bin/carddisp.pl?gene=UBR5
NEU3	Neuraminidase 3	Protein Coding	45	GC11P078455	2.81013	https://www.genecards.org/cgi-bin/carddisp.pl?gene=NEU3
CASP7	Caspase 7	Protein Coding	56	GC10P113679	2.8093	https://www.genecards.org/cgi-bin/carddisp.pl?gene=CASP7
RPL5	Ribosomal Protein L5	Protein Coding	54	GC01P092832	2.80825	https://www.genecards.org/cgi-bin/carddisp.pl?gene=RPL5
KRT5	Keratin 5	Protein Coding	52	GC12M052514	2.80821	https://www.genecards.org/cgi-bin/carddisp.pl?gene=KRT5
PLXNA1	Plexin A1	Protein Coding	51	GC03P126988	2.80785	https://www.genecards.org/cgi-bin/carddisp.pl?gene=PLXNA1
ATP6V0A2	ATPase H+ Transporting V0 Subunit A2	Protein Coding	51	GC12P123712	2.80685	https://www.genecards.org/cgi-bin/carddisp.pl?gene=ATP6V0A2
HNRNPD	Heterogeneous Nuclear Ribonucleoprotein D	Protein Coding	50	GC04M082352	2.80243	https://www.genecards.org/cgi-bin/carddisp.pl?gene=HNRNPD
MIR125A	MicroRNA 125a	RNA Gene	23	GC19P073357	2.79938	https://www.genecards.org/cgi-bin/carddisp.pl?gene=MIR125A
OSCP1	Organic Solute Carrier Partner 1	Protein Coding	39	GC01M036415	2.79837	https://www.genecards.org/cgi-bin/carddisp.pl?gene=OSCP1
H2AC12	H2A Clustered Histone 12	Protein Coding	38	GC06P093031	2.79738	https://www.genecards.org/cgi-bin/carddisp.pl?gene=H2AC12
SHH	Sonic Hedgehog Signaling Molecule	Protein Coding	57	GC07M155799	2.79393	https://www.genecards.org/cgi-bin/carddisp.pl?gene=SHH
NOP53	NOP53 Ribosome Biogenesis Factor	Protein Coding	40	GC19P073147	2.79306	https://www.genecards.org/cgi-bin/carddisp.pl?gene=NOP53
HSP90AB1	Heat Shock Protein 90 Alpha Family Class B Member 1	Protein Coding	56	GC06P044246	2.79248	https://www.genecards.org/cgi-bin/carddisp.pl?gene=HSP90AB1
C1QA	Complement C1q A Chain	Protein Coding	53	GC01P022636	2.79113	https://www.genecards.org/cgi-bin/carddisp.pl?gene=C1QA
RASSF1	Ras Association Domain Family Member 1	Protein Coding	49	GC03M050329	2.78789	https://www.genecards.org/cgi-bin/carddisp.pl?gene=RASSF1
SIGLEC11	Sialic Acid Binding Ig Like Lectin 11	Protein Coding	45	GC19M049948	2.78514	https://www.genecards.org/cgi-bin/carddisp.pl?gene=SIGLEC11
TUBA1B	Tubulin Alpha 1b	Protein Coding	51	GC12M049127	2.78303	https://www.genecards.org/cgi-bin/carddisp.pl?gene=TUBA1B
KRT8	Keratin 8	Protein Coding	53	GC12M052897	2.78198	https://www.genecards.org/cgi-bin/carddisp.pl?gene=KRT8
FABP12	Fatty Acid Binding Protein 12	Protein Coding	38	GC08M081524	2.78187	https://www.genecards.org/cgi-bin/carddisp.pl?gene=FABP12
SPTBN1	Spectrin Beta, Non-Erythrocytic 1	Protein Coding	52	GC02P054456	2.78159	https://www.genecards.org/cgi-bin/carddisp.pl?gene=SPTBN1
EIF4E	Eukaryotic Translation Initiation Factor 4E	Protein Coding	56	GC04M098879	2.77835	https://www.genecards.org/cgi-bin/carddisp.pl?gene=EIF4E
CHTOP	Chromatin Target Of PRMT1	Protein Coding	40	GC01P153633	2.7781	https://www.genecards.org/cgi-bin/carddisp.pl?gene=CHTOP
MIR155HG	MIR155 Host Gene	RNA Gene	25	GC21P025597	2.77804	https://www.genecards.org/cgi-bin/carddisp.pl?gene=MIR155HG
CREB3L2	CAMP Responsive Element Binding Protein 3 Like 2	Protein Coding	46	GC07M137874	2.77404	https://www.genecards.org/cgi-bin/carddisp.pl?gene=CREB3L2
ATRX	ATRX Chromatin Remodeler	Protein Coding	53	GC0XM077504	2.77333	https://www.genecards.org/cgi-bin/carddisp.pl?gene=ATRX
SYP	Synaptophysin	Protein Coding	52	GC0XM049187	2.77315	https://www.genecards.org/cgi-bin/carddisp.pl?gene=SYP
SUSD2	Sushi Domain Containing 2	Protein Coding	45	GC22P024181	2.77261	https://www.genecards.org/cgi-bin/carddisp.pl?gene=SUSD2
EFEMP2	EGF Containing Fibulin Extracellular Matrix Protein 2	Protein Coding	51	GC11M099735	2.77253	https://www.genecards.org/cgi-bin/carddisp.pl?gene=EFEMP2
NDRG1	N-Myc Downstream Regulated 1	Protein Coding	52	GC08M133237	2.77222	https://www.genecards.org/cgi-bin/carddisp.pl?gene=NDRG1
MAZ	MYC Associated Zinc Finger Protein	Protein Coding	46	GC16P029806	2.77105	https://www.genecards.org/cgi-bin/carddisp.pl?gene=MAZ
RPL18A	Ribosomal Protein L18a	Protein Coding	44	GC19P072415	2.77048	https://www.genecards.org/cgi-bin/carddisp.pl?gene=RPL18A
FBXO22	F-Box Protein 22	Protein Coding	40	GC15P075903	2.76868	https://www.genecards.org/cgi-bin/carddisp.pl?gene=FBXO22
ACP3	Acid Phosphatase 3	Protein Coding	50	GC03P135034	2.76722	https://www.genecards.org/cgi-bin/carddisp.pl?gene=ACP3
TXNRD1	Thioredoxin Reductase 1	Protein Coding	51	GC12P104215	2.76401	https://www.genecards.org/cgi-bin/carddisp.pl?gene=TXNRD1
MELTF	Melanotransferrin	Protein Coding	48	GC03M196980	2.76311	https://www.genecards.org/cgi-bin/carddisp.pl?gene=MELTF
GH1	Growth Hormone 1	Protein Coding	50	GC17M063917	2.76218	https://www.genecards.org/cgi-bin/carddisp.pl?gene=GH1
CEMIP	Cell Migration Inducing Hyaluronidase 1	Protein Coding	44	GC15P080779	2.76095	https://www.genecards.org/cgi-bin/carddisp.pl?gene=CEMIP
GOLM1	Golgi Membrane Protein 1	Protein Coding	46	GC09M086026	2.75728	https://www.genecards.org/cgi-bin/carddisp.pl?gene=GOLM1
MSH6	MutS Homolog 6	Protein Coding	55	GC02P047695	2.75543	https://www.genecards.org/cgi-bin/carddisp.pl?gene=MSH6
DLL4	Delta Like Canonical Notch Ligand 4	Protein Coding	54	GC15P040929	2.75418	https://www.genecards.org/cgi-bin/carddisp.pl?gene=DLL4
DOK3	Docking Protein 3	Protein Coding	44	GC05M177501	2.7533	https://www.genecards.org/cgi-bin/carddisp.pl?gene=DOK3
PLXNB1	Plexin B1	Protein Coding	50	GC03M048403	2.75227	https://www.genecards.org/cgi-bin/carddisp.pl?gene=PLXNB1
ECI2	Enoyl-CoA Delta Isomerase 2	Protein Coding	48	GC06M004115	2.75155	https://www.genecards.org/cgi-bin/carddisp.pl?gene=ECI2
SPHK1	Sphingosine Kinase 1	Protein Coding	53	GC17P076376	2.7487	https://www.genecards.org/cgi-bin/carddisp.pl?gene=SPHK1
ROR2	Receptor Tyrosine Kinase Like Orphan Receptor 2	Protein Coding	55	GC09M096500	2.74744	https://www.genecards.org/cgi-bin/carddisp.pl?gene=ROR2
BCAS3	BCAS3 Microtubule Associated Cell Migration Factor	Protein Coding	44	GC17P063137	2.74359	https://www.genecards.org/cgi-bin/carddisp.pl?gene=BCAS3
HYOU1	Hypoxia Up-Regulated 1	Protein Coding	52	GC11M119272	2.74079	https://www.genecards.org/cgi-bin/carddisp.pl?gene=HYOU1
PAPPA	Pappalysin 1	Protein Coding	50	GC09P119606	2.74071	https://www.genecards.org/cgi-bin/carddisp.pl?gene=PAPPA
YWHAE	Tyrosine 3-Monooxygenase/Tryptophan 5-Monooxygenase Activation Protein Epsilon	Protein Coding	56	GC17M006716	2.7379	https://www.genecards.org/cgi-bin/carddisp.pl?gene=YWHAE
AGO1	Argonaute RISC Component 1	Protein Coding	47	GC01P035869	2.73425	https://www.genecards.org/cgi-bin/carddisp.pl?gene=AGO1
CADM1	Cell Adhesion Molecule 1	Protein Coding	51	GC11M115169	2.73317	https://www.genecards.org/cgi-bin/carddisp.pl?gene=CADM1
PTPRO	Protein Tyrosine Phosphatase Receptor Type O	Protein Coding	54	GC12P023827	2.73192	https://www.genecards.org/cgi-bin/carddisp.pl?gene=PTPRO
PHB1	Prohibitin 1	Protein Coding	53	GC17M052178	2.72983	https://www.genecards.org/cgi-bin/carddisp.pl?gene=PHB1
ACTN1	Actinin Alpha 1	Protein Coding	56	GC14M068874	2.72506	https://www.genecards.org/cgi-bin/carddisp.pl?gene=ACTN1
ETV6	ETS Variant Transcription Factor 6	Protein Coding	52	GC12P011649	2.72379	https://www.genecards.org/cgi-bin/carddisp.pl?gene=ETV6
ALDH2	Aldehyde Dehydrogenase 2 Family Member	Protein Coding	57	GC12P111766	2.72076	https://www.genecards.org/cgi-bin/carddisp.pl?gene=ALDH2
HNRNPF	Heterogeneous Nuclear Ribonucleoprotein F	Protein Coding	47	GC10M043385	2.71728	https://www.genecards.org/cgi-bin/carddisp.pl?gene=HNRNPF
SLC2A3	Solute Carrier Family 2 Member 3	Protein Coding	55	GC12M007919	2.71676	https://www.genecards.org/cgi-bin/carddisp.pl?gene=SLC2A3
KRT19	Keratin 19	Protein Coding	50	GC17M041523	2.71652	https://www.genecards.org/cgi-bin/carddisp.pl?gene=KRT19
MAP2K2	Mitogen-Activated Protein Kinase Kinase 2	Protein Coding	61	GC19M004090	2.71533	https://www.genecards.org/cgi-bin/carddisp.pl?gene=MAP2K2
RPL26	Ribosomal Protein L26	Protein Coding	49	GC17M008377	2.71518	https://www.genecards.org/cgi-bin/carddisp.pl?gene=RPL26
MRAS	Muscle RAS Oncogene Homolog	Protein Coding	51	GC03P138347	2.71255	https://www.genecards.org/cgi-bin/carddisp.pl?gene=MRAS
ANXA6	Annexin A6	Protein Coding	49	GC05M151100	2.71244	https://www.genecards.org/cgi-bin/carddisp.pl?gene=ANXA6
PFN1	Profilin 1	Protein Coding	53	GC17M004945	2.70951	https://www.genecards.org/cgi-bin/carddisp.pl?gene=PFN1
PLVAP	Plasmalemma Vesicle Associated Protein	Protein Coding	45	GC19M017351	2.70382	https://www.genecards.org/cgi-bin/carddisp.pl?gene=PLVAP
CHP2	Calcineurin Like EF-Hand Protein 2	Protein Coding	39	GC16P024568	2.70095	https://www.genecards.org/cgi-bin/carddisp.pl?gene=CHP2
RPS3A	Ribosomal Protein S3A	Protein Coding	47	GC04P151099	2.69972	https://www.genecards.org/cgi-bin/carddisp.pl?gene=RPS3A
NOP56	NOP56 Ribonucleoprotein	Protein Coding	51	GC20P004475	2.69957	https://www.genecards.org/cgi-bin/carddisp.pl?gene=NOP56
RPL7	Ribosomal Protein L7	Protein Coding	48	GC08M073290	2.69957	https://www.genecards.org/cgi-bin/carddisp.pl?gene=RPL7
U2AF1	U2 Small Nuclear RNA Auxiliary Factor 1	Protein Coding	50	GC21M043092	2.69843	https://www.genecards.org/cgi-bin/carddisp.pl?gene=U2AF1
TSLP	Thymic Stromal Lymphopoietin	Protein Coding	46	GC05P111070	2.69624	https://www.genecards.org/cgi-bin/carddisp.pl?gene=TSLP
MLH1	MutL Homolog 1	Protein Coding	55	GC03P036993	2.69588	https://www.genecards.org/cgi-bin/carddisp.pl?gene=MLH1
FDFT1	Farnesyl-Diphosphate Farnesyltransferase 1	Protein Coding	51	GC08P011795	2.69587	https://www.genecards.org/cgi-bin/carddisp.pl?gene=FDFT1
WNT3A	Wnt Family Member 3A	Protein Coding	54	GC01P229575	2.69535	https://www.genecards.org/cgi-bin/carddisp.pl?gene=WNT3A
SIGLEC10	Sialic Acid Binding Ig Like Lectin 10	Protein Coding	47	GC19M051410	2.6939	https://www.genecards.org/cgi-bin/carddisp.pl?gene=SIGLEC10
APAF1	Apoptotic Peptidase Activating Factor 1	Protein Coding	52	GC12P098645	2.69379	https://www.genecards.org/cgi-bin/carddisp.pl?gene=APAF1
SERPINE2	Serpin Family E Member 2	Protein Coding	48	GC02M223975	2.69348	https://www.genecards.org/cgi-bin/carddisp.pl?gene=SERPINE2
RBM39	RNA Binding Motif Protein 39	Protein Coding	44	GC20M035703	2.69232	https://www.genecards.org/cgi-bin/carddisp.pl?gene=RBM39
EIF4B	Eukaryotic Translation Initiation Factor 4B	Protein Coding	48	GC12P053006	2.68972	https://www.genecards.org/cgi-bin/carddisp.pl?gene=EIF4B
MIR30E	MicroRNA 30e	RNA Gene	25	GC01P040754	2.68772	https://www.genecards.org/cgi-bin/carddisp.pl?gene=MIR30E
CTAGE4	CTAGE Family Member 4	Protein Coding	30	GC07P144183	2.68715	https://www.genecards.org/cgi-bin/carddisp.pl?gene=CTAGE4
MIR125B2	MicroRNA 125b-2	RNA Gene	23	GC21P016590	2.68659	https://www.genecards.org/cgi-bin/carddisp.pl?gene=MIR125B2
TRA2B	Transformer 2 Beta Homolog	Protein Coding	46	GC03M185914	2.68634	https://www.genecards.org/cgi-bin/carddisp.pl?gene=TRA2B
DCD	Dermcidin	Protein Coding	43	GC12M054644	2.68557	https://www.genecards.org/cgi-bin/carddisp.pl?gene=DCD
CRH	Corticotropin Releasing Hormone	Protein Coding	50	GC08M066176	2.68315	https://www.genecards.org/cgi-bin/carddisp.pl?gene=CRH
KYNU	Kynureninase	Protein Coding	55	GC02P142877	2.6803	https://www.genecards.org/cgi-bin/carddisp.pl?gene=KYNU
CFL1	Cofilin 1	Protein Coding	52	GC11M065823	2.68003	https://www.genecards.org/cgi-bin/carddisp.pl?gene=CFL1
LINC01116	Long Intergenic Non-Protein Coding RNA 1116	RNA Gene	19	GC02M176400	2.6793	https://www.genecards.org/cgi-bin/carddisp.pl?gene=LINC01116
FANCD2	FA Complementation Group D2	Protein Coding	52	GC03P010026	2.67902	https://www.genecards.org/cgi-bin/carddisp.pl?gene=FANCD2
SDCBP	Syndecan Binding Protein	Protein Coding	47	GC08P058539	2.67776	https://www.genecards.org/cgi-bin/carddisp.pl?gene=SDCBP
GPER1	G Protein-Coupled Estrogen Receptor 1	Protein Coding	48	GC07P003391	2.67717	https://www.genecards.org/cgi-bin/carddisp.pl?gene=GPER1
IL17F	Interleukin 17F	Protein Coding	50	GC06M072074	2.67673	https://www.genecards.org/cgi-bin/carddisp.pl?gene=IL17F
TPD52	Tumor Protein D52	Protein Coding	47	GC08M080031	2.67658	https://www.genecards.org/cgi-bin/carddisp.pl?gene=TPD52
CDKN2B-AS1	CDKN2B Antisense RNA 1	RNA Gene	26	GC09P021994	2.6764	https://www.genecards.org/cgi-bin/carddisp.pl?gene=CDKN2B-AS1
HGS	Hepatocyte Growth Factor-Regulated Tyrosine Kinase Substrate	Protein Coding	50	GC17P081683	2.67613	https://www.genecards.org/cgi-bin/carddisp.pl?gene=HGS
SLC7A1	Solute Carrier Family 7 Member 1	Protein Coding	49	GC13M029509	2.6734	https://www.genecards.org/cgi-bin/carddisp.pl?gene=SLC7A1
RPL21	Ribosomal Protein L21	Protein Coding	51	GC13P027251	2.66779	https://www.genecards.org/cgi-bin/carddisp.pl?gene=RPL21
DDC	Dopa Decarboxylase	Protein Coding	57	GC07M050458	2.66573	https://www.genecards.org/cgi-bin/carddisp.pl?gene=DDC
TOMM20	Translocase Of Outer Mitochondrial Membrane 20	Protein Coding	46	GC01M235109	2.66292	https://www.genecards.org/cgi-bin/carddisp.pl?gene=TOMM20
CEACAM1	CEA Cell Adhesion Molecule 1	Protein Coding	51	GC19M042507	2.65951	https://www.genecards.org/cgi-bin/carddisp.pl?gene=CEACAM1
PDK1	Pyruvate Dehydrogenase Kinase 1	Protein Coding	53	GC02P172555	2.6575	https://www.genecards.org/cgi-bin/carddisp.pl?gene=PDK1
FLCN	Folliculin	Protein Coding	48	GC17M017212	2.65594	https://www.genecards.org/cgi-bin/carddisp.pl?gene=FLCN
SNAI2	Snail Family Transcriptional Repressor 2	Protein Coding	51	GC08M048917	2.65251	https://www.genecards.org/cgi-bin/carddisp.pl?gene=SNAI2
XRCC3	X-Ray Repair Cross Complementing 3	Protein Coding	50	GC14M103697	2.65207	https://www.genecards.org/cgi-bin/carddisp.pl?gene=XRCC3
CD2	CD2 Molecule	Protein Coding	51	GC01P116754	2.64972	https://www.genecards.org/cgi-bin/carddisp.pl?gene=CD2
RBM17	RNA Binding Motif Protein 17	Protein Coding	46	GC10P006089	2.64939	https://www.genecards.org/cgi-bin/carddisp.pl?gene=RBM17
SDC1	Syndecan 1	Protein Coding	50	GC02M020200	2.64825	https://www.genecards.org/cgi-bin/carddisp.pl?gene=SDC1
KDM1A	Lysine Demethylase 1A	Protein Coding	56	GC01P023019	2.64819	https://www.genecards.org/cgi-bin/carddisp.pl?gene=KDM1A
RPLP2	Ribosomal Protein Lateral Stalk Subunit P2	Protein Coding	47	GC11P002105	2.64801	https://www.genecards.org/cgi-bin/carddisp.pl?gene=RPLP2
GSDMC	Gasdermin C	Protein Coding	40	GC08M129705	2.64602	https://www.genecards.org/cgi-bin/carddisp.pl?gene=GSDMC
CUL4A	Cullin 4A	Protein Coding	50	GC13P113208	2.64455	https://www.genecards.org/cgi-bin/carddisp.pl?gene=CUL4A
RPL23A	Ribosomal Protein L23a	Protein Coding	47	GC17P028719	2.64414	https://www.genecards.org/cgi-bin/carddisp.pl?gene=RPL23A
ATP6V0D2	ATPase H+ Transporting V0 Subunit D2	Protein Coding	44	GC08P085987	2.64367	https://www.genecards.org/cgi-bin/carddisp.pl?gene=ATP6V0D2
IRS1	Insulin Receptor Substrate 1	Protein Coding	53	GC02M226731	2.63982	https://www.genecards.org/cgi-bin/carddisp.pl?gene=IRS1
HNRNPC	Heterogeneous Nuclear Ribonucleoprotein C	Protein Coding	48	GC14M023657	2.63886	https://www.genecards.org/cgi-bin/carddisp.pl?gene=HNRNPC
VENTX	VENT Homeobox	Protein Coding	39	GC10P133238	2.63833	https://www.genecards.org/cgi-bin/carddisp.pl?gene=VENTX
ITGA2	Integrin Subunit Alpha 2	Protein Coding	53	GC05P052989	2.63788	https://www.genecards.org/cgi-bin/carddisp.pl?gene=ITGA2
MIRLET7B	MicroRNA Let-7b	RNA Gene	22	GC22P046157	2.63558	https://www.genecards.org/cgi-bin/carddisp.pl?gene=MIRLET7B
APOBEC3A	Apolipoprotein B MRNA Editing Enzyme Catalytic Subunit 3A	Protein Coding	44	GC22P038952	2.63497	https://www.genecards.org/cgi-bin/carddisp.pl?gene=APOBEC3A
SRF	Serum Response Factor	Protein Coding	50	GC06P043171	2.63396	https://www.genecards.org/cgi-bin/carddisp.pl?gene=SRF
SLC16A4	Solute Carrier Family 16 Member 4	Protein Coding	46	GC01M110362	2.63332	https://www.genecards.org/cgi-bin/carddisp.pl?gene=SLC16A4
UTRN	Utrophin	Protein Coding	47	GC06P144285	2.63258	https://www.genecards.org/cgi-bin/carddisp.pl?gene=UTRN
MAG	Myelin Associated Glycoprotein	Protein Coding	54	GC19P035292	2.63122	https://www.genecards.org/cgi-bin/carddisp.pl?gene=MAG
CSN1S1	Casein Alpha S1	Protein Coding	43	GC04P069932	2.62788	https://www.genecards.org/cgi-bin/carddisp.pl?gene=CSN1S1
HNRNPK	Heterogeneous Nuclear Ribonucleoprotein K	Protein Coding	52	GC09M096203	2.62375	https://www.genecards.org/cgi-bin/carddisp.pl?gene=HNRNPK
POFUT1	Protein O-Fucosyltransferase 1	Protein Coding	51	GC20P032207	2.6233	https://www.genecards.org/cgi-bin/carddisp.pl?gene=POFUT1
LRIG1	Leucine Rich Repeats And Immunoglobulin Like Domains 1	Protein Coding	49	GC03M066379	2.62288	https://www.genecards.org/cgi-bin/carddisp.pl?gene=LRIG1
HNRNPDL	Heterogeneous Nuclear Ribonucleoprotein D Like	Protein Coding	50	GC04M082422	2.61849	https://www.genecards.org/cgi-bin/carddisp.pl?gene=HNRNPDL
ALPP	Alkaline Phosphatase, Placental	Protein Coding	51	GC02P232378	2.61741	https://www.genecards.org/cgi-bin/carddisp.pl?gene=ALPP
MPZ	Myelin Protein Zero	Protein Coding	52	GC01M161304	2.6168	https://www.genecards.org/cgi-bin/carddisp.pl?gene=MPZ
RPL28	Ribosomal Protein L28	Protein Coding	46	GC19P073520	2.61611	https://www.genecards.org/cgi-bin/carddisp.pl?gene=RPL28
DHX15	DEAH-Box Helicase 15	Protein Coding	47	GC04M024519	2.61569	https://www.genecards.org/cgi-bin/carddisp.pl?gene=DHX15
PDIA6	Protein Disulfide Isomerase Family A Member 6	Protein Coding	46	GC02M010784	2.61477	https://www.genecards.org/cgi-bin/carddisp.pl?gene=PDIA6
INSR	Insulin Receptor	Protein Coding	60	GC19M007112	2.61365	https://www.genecards.org/cgi-bin/carddisp.pl?gene=INSR
FBXW11	F-Box And WD Repeat Domain Containing 11	Protein Coding	52	GC05M171861	2.61208	https://www.genecards.org/cgi-bin/carddisp.pl?gene=FBXW11
FILIP1L	Filamin A Interacting Protein 1 Like	Protein Coding	41	GC03M099830	2.61173	https://www.genecards.org/cgi-bin/carddisp.pl?gene=FILIP1L
ALDH1A1	Aldehyde Dehydrogenase 1 Family Member A1	Protein Coding	54	GC09M072900	2.61143	https://www.genecards.org/cgi-bin/carddisp.pl?gene=ALDH1A1
TUBA1C	Tubulin Alpha 1c	Protein Coding	48	GC12P049188	2.60709	https://www.genecards.org/cgi-bin/carddisp.pl?gene=TUBA1C
HNRNPU	Heterogeneous Nuclear Ribonucleoprotein U	Protein Coding	50	GC01M244844	2.60647	https://www.genecards.org/cgi-bin/carddisp.pl?gene=HNRNPU
NOX1	NADPH Oxidase 1	Protein Coding	50	GC0XM100843	2.6025	https://www.genecards.org/cgi-bin/carddisp.pl?gene=NOX1
RPL37A	Ribosomal Protein L37a	Protein Coding	44	GC02P216498	2.60152	https://www.genecards.org/cgi-bin/carddisp.pl?gene=RPL37A
ITGB6	Integrin Subunit Beta 6	Protein Coding	55	GC02M160099	2.59995	https://www.genecards.org/cgi-bin/carddisp.pl?gene=ITGB6
FFAR4	Free Fatty Acid Receptor 4	Protein Coding	47	GC10P093566	2.59855	https://www.genecards.org/cgi-bin/carddisp.pl?gene=FFAR4
DEFB1	Defensin Beta 1	Protein Coding	46	GC08M006870	2.59588	https://www.genecards.org/cgi-bin/carddisp.pl?gene=DEFB1
PI4KA	Phosphatidylinositol 4-Kinase Alpha	Protein Coding	55	GC22M020707	2.59412	https://www.genecards.org/cgi-bin/carddisp.pl?gene=PI4KA
RPL18	Ribosomal Protein L18	Protein Coding	51	GC19M048615	2.59302	https://www.genecards.org/cgi-bin/carddisp.pl?gene=RPL18
EEF1A1	Eukaryotic Translation Elongation Factor 1 Alpha 1	Protein Coding	50	GC06M074523	2.59245	https://www.genecards.org/cgi-bin/carddisp.pl?gene=EEF1A1
ETV5	ETS Variant Transcription Factor 5	Protein Coding	46	GC03M186046	2.59151	https://www.genecards.org/cgi-bin/carddisp.pl?gene=ETV5
PLXND1	Plexin D1	Protein Coding	50	GC03M129555	2.59105	https://www.genecards.org/cgi-bin/carddisp.pl?gene=PLXND1
PABPC1	Poly(A) Binding Protein Cytoplasmic 1	Protein Coding	49	GC08M100685	2.59057	https://www.genecards.org/cgi-bin/carddisp.pl?gene=PABPC1
STUB1	STIP1 Homology And U-Box Containing Protein 1	Protein Coding	53	GC16P013453	2.59042	https://www.genecards.org/cgi-bin/carddisp.pl?gene=STUB1
TMPRSS2	Transmembrane Serine Protease 2	Protein Coding	55	GC21M041464	2.58875	https://www.genecards.org/cgi-bin/carddisp.pl?gene=TMPRSS2
TM4SF5	Transmembrane 4 L Six Family Member 5	Protein Coding	39	GC17P004771	2.58796	https://www.genecards.org/cgi-bin/carddisp.pl?gene=TM4SF5
ASXL1	ASXL Transcriptional Regulator 1	Protein Coding	50	GC20P032719	2.58774	https://www.genecards.org/cgi-bin/carddisp.pl?gene=ASXL1
HGFAC	HGF Activator	Protein Coding	48	GC04P003443	2.58582	https://www.genecards.org/cgi-bin/carddisp.pl?gene=HGFAC
MIR192	MicroRNA 192	RNA Gene	24	GC11M064891	2.57925	https://www.genecards.org/cgi-bin/carddisp.pl?gene=MIR192
HMMR	Hyaluronan Mediated Motility Receptor	Protein Coding	50	GC05P163480	2.57679	https://www.genecards.org/cgi-bin/carddisp.pl?gene=HMMR
PSMA7	Proteasome 20S Subunit Alpha 7	Protein Coding	51	GC20M062136	2.57435	https://www.genecards.org/cgi-bin/carddisp.pl?gene=PSMA7
SERPINF2	Serpin Family F Member 2	Protein Coding	52	GC17P001742	2.57434	https://www.genecards.org/cgi-bin/carddisp.pl?gene=SERPINF2
HBA1	Hemoglobin Subunit Alpha 1	Protein Coding	49	GC16P013428	2.57209	https://www.genecards.org/cgi-bin/carddisp.pl?gene=HBA1
RBM14	RNA Binding Motif Protein 14	Protein Coding	45	GC11P070979	2.5683	https://www.genecards.org/cgi-bin/carddisp.pl?gene=RBM14
LOXL2	Lysyl Oxidase Like 2	Protein Coding	53	GC08M023296	2.56763	https://www.genecards.org/cgi-bin/carddisp.pl?gene=LOXL2
FABP5	Fatty Acid Binding Protein 5	Protein Coding	49	GC08P081282	2.5664	https://www.genecards.org/cgi-bin/carddisp.pl?gene=FABP5
HEXIM1	HEXIM P-TEFb Complex Subunit 1	Protein Coding	45	GC17P062094	2.56388	https://www.genecards.org/cgi-bin/carddisp.pl?gene=HEXIM1
HNF1B	HNF1 Homeobox B	Protein Coding	50	GC17M037686	2.56265	https://www.genecards.org/cgi-bin/carddisp.pl?gene=HNF1B
EPHA3	EPH Receptor A3	Protein Coding	53	GC03P089077	2.55912	https://www.genecards.org/cgi-bin/carddisp.pl?gene=EPHA3
NTRK1	Neurotrophic Receptor Tyrosine Kinase 1	Protein Coding	57	GC01P156815	2.55898	https://www.genecards.org/cgi-bin/carddisp.pl?gene=NTRK1
ITGA3	Integrin Subunit Alpha 3	Protein Coding	55	GC17P050055	2.55864	https://www.genecards.org/cgi-bin/carddisp.pl?gene=ITGA3
RPL9	Ribosomal Protein L9	Protein Coding	46	GC04M039452	2.55721	https://www.genecards.org/cgi-bin/carddisp.pl?gene=RPL9
BCLAF1	BCL2 Associated Transcription Factor 1	Protein Coding	47	GC06M136256	2.55717	https://www.genecards.org/cgi-bin/carddisp.pl?gene=BCLAF1
RRAS	RAS Related	Protein Coding	48	GC19M049635	2.55101	https://www.genecards.org/cgi-bin/carddisp.pl?gene=RRAS
H3-4	H3.4 Histone, Cluster Member	Protein Coding	44	GC01M228427	2.55075	https://www.genecards.org/cgi-bin/carddisp.pl?gene=H3-4
COL3A1	Collagen Type III Alpha 1 Chain	Protein Coding	54	GC02P188974	2.54983	https://www.genecards.org/cgi-bin/carddisp.pl?gene=COL3A1
CPSF2	Cleavage And Polyadenylation Specific Factor 2	Protein Coding	44	GC14P092121	2.54737	https://www.genecards.org/cgi-bin/carddisp.pl?gene=CPSF2
TNFRSF18	TNF Receptor Superfamily Member 18	Protein Coding	48	GC01M001203	2.54579	https://www.genecards.org/cgi-bin/carddisp.pl?gene=TNFRSF18
MMP10	Matrix Metallopeptidase 10	Protein Coding	51	GC11M102770	2.54534	https://www.genecards.org/cgi-bin/carddisp.pl?gene=MMP10
IFIT1	Interferon Induced Protein With Tetratricopeptide Repeats 1	Protein Coding	46	GC10P094624	2.54084	https://www.genecards.org/cgi-bin/carddisp.pl?gene=IFIT1
HBA2	Hemoglobin Subunit Alpha 2	Protein Coding	48	GC16P013429	2.53711	https://www.genecards.org/cgi-bin/carddisp.pl?gene=HBA2
XRCC5	X-Ray Repair Cross Complementing 5	Protein Coding	51	GC02P216107	2.53408	https://www.genecards.org/cgi-bin/carddisp.pl?gene=XRCC5
ITGB5	Integrin Subunit Beta 5	Protein Coding	53	GC03M124761	2.5334	https://www.genecards.org/cgi-bin/carddisp.pl?gene=ITGB5
RTEL1	Regulator Of Telomere Elongation Helicase 1	Protein Coding	48	GC20P063658	2.52867	https://www.genecards.org/cgi-bin/carddisp.pl?gene=RTEL1
MIR142	MicroRNA 142	RNA Gene	24	GC17M058331	2.52622	https://www.genecards.org/cgi-bin/carddisp.pl?gene=MIR142
DNM1L	Dynamin 1 Like	Protein Coding	54	GC12P032679	2.52415	https://www.genecards.org/cgi-bin/carddisp.pl?gene=DNM1L
C1GALT1C1	C1GALT1 Specific Chaperone 1	Protein Coding	43	GC0XM120625	2.52333	https://www.genecards.org/cgi-bin/carddisp.pl?gene=C1GALT1C1
RPS7	Ribosomal Protein S7	Protein Coding	48	GC02P003575	2.52148	https://www.genecards.org/cgi-bin/carddisp.pl?gene=RPS7
PGK1	Phosphoglycerate Kinase 1	Protein Coding	56	GC0XP078032	2.52138	https://www.genecards.org/cgi-bin/carddisp.pl?gene=PGK1
MIR17	MicroRNA 17	RNA Gene	22	GC13P091350	2.52007	https://www.genecards.org/cgi-bin/carddisp.pl?gene=MIR17
WNT1	Wnt Family Member 1	Protein Coding	52	GC12P049566	2.51917	https://www.genecards.org/cgi-bin/carddisp.pl?gene=WNT1
DDR1	Discoidin Domain Receptor Tyrosine Kinase 1	Protein Coding	53	GC06P092137	2.51784	https://www.genecards.org/cgi-bin/carddisp.pl?gene=DDR1
PROS1	Protein S	Protein Coding	55	GC03M093873	2.51637	https://www.genecards.org/cgi-bin/carddisp.pl?gene=PROS1
CFB	Complement Factor B	Protein Coding	54	GC06P031945	2.51416	https://www.genecards.org/cgi-bin/carddisp.pl?gene=CFB
TGM3	Transglutaminase 3	Protein Coding	50	GC20P002296	2.51114	https://www.genecards.org/cgi-bin/carddisp.pl?gene=TGM3
SDHA	Succinate Dehydrogenase Complex Flavoprotein Subunit A	Protein Coding	54	GC05P000220	2.50806	https://www.genecards.org/cgi-bin/carddisp.pl?gene=SDHA
PSPC1	Paraspeckle Component 1	Protein Coding	40	GC13M020756	2.50795	https://www.genecards.org/cgi-bin/carddisp.pl?gene=PSPC1
NCR1	Natural Cytotoxicity Triggering Receptor 1	Protein Coding	46	GC19P073508	2.50788	https://www.genecards.org/cgi-bin/carddisp.pl?gene=NCR1
SPHK2	Sphingosine Kinase 2	Protein Coding	51	GC19P048619	2.50773	https://www.genecards.org/cgi-bin/carddisp.pl?gene=SPHK2
TTF2	Transcription Termination Factor 2	Protein Coding	46	GC01P117060	2.50608	https://www.genecards.org/cgi-bin/carddisp.pl?gene=TTF2
TERF2	Telomeric Repeat Binding Factor 2	Protein Coding	48	GC16M069355	2.50594	https://www.genecards.org/cgi-bin/carddisp.pl?gene=TERF2
SLAMF7	SLAM Family Member 7	Protein Coding	50	GC01P160740	2.50524	https://www.genecards.org/cgi-bin/carddisp.pl?gene=SLAMF7
RALA	RAS Like Proto-Oncogene A	Protein Coding	52	GC07P039622	2.50453	https://www.genecards.org/cgi-bin/carddisp.pl?gene=RALA
GSS	Glutathione Synthetase	Protein Coding	53	GC20M034928	2.49712	https://www.genecards.org/cgi-bin/carddisp.pl?gene=GSS
PDCD6IP	Programmed Cell Death 6 Interacting Protein	Protein Coding	50	GC03P033798	2.49616	https://www.genecards.org/cgi-bin/carddisp.pl?gene=PDCD6IP
CTAGE3P	CTAGE Family Member 3, Pseudogene	Pseudogene	17	GC13M051907	2.49611	https://www.genecards.org/cgi-bin/carddisp.pl?gene=CTAGE3P
MGMT	O-6-Methylguanine-DNA Methyltransferase	Protein Coding	56	GC10P129467	2.49341	https://www.genecards.org/cgi-bin/carddisp.pl?gene=MGMT
HNRNPAB	Heterogeneous Nuclear Ribonucleoprotein A/B	Protein Coding	44	GC05P178204	2.49319	https://www.genecards.org/cgi-bin/carddisp.pl?gene=HNRNPAB
EIF2S2	Eukaryotic Translation Initiation Factor 2 Subunit Beta	Protein Coding	47	GC20M034088	2.49128	https://www.genecards.org/cgi-bin/carddisp.pl?gene=EIF2S2
COMMD1	Copper Metabolism Domain Containing 1	Protein Coding	47	GC02P061888	2.49082	https://www.genecards.org/cgi-bin/carddisp.pl?gene=COMMD1
MIR451A	MicroRNA 451a	RNA Gene	19	GC17M028861	2.48869	https://www.genecards.org/cgi-bin/carddisp.pl?gene=MIR451A
IDH2	Isocitrate Dehydrogenase (NADP(+)) 2	Protein Coding	60	GC15M090083	2.4879	https://www.genecards.org/cgi-bin/carddisp.pl?gene=IDH2
MB	Myoglobin	Protein Coding	50	GC22M035606	2.48732	https://www.genecards.org/cgi-bin/carddisp.pl?gene=MB
EBI3	Epstein-Barr Virus Induced 3	Protein Coding	46	GC19P004232	2.485	https://www.genecards.org/cgi-bin/carddisp.pl?gene=EBI3
SIGLEC5	Sialic Acid Binding Ig Like Lectin 5	Protein Coding	47	GC19M071022	2.48499	https://www.genecards.org/cgi-bin/carddisp.pl?gene=SIGLEC5
PPP1CC	Protein Phosphatase 1 Catalytic Subunit Gamma	Protein Coding	51	GC12M110709	2.48456	https://www.genecards.org/cgi-bin/carddisp.pl?gene=PPP1CC
SELENBP1	Selenium Binding Protein 1	Protein Coding	50	GC01M151364	2.48429	https://www.genecards.org/cgi-bin/carddisp.pl?gene=SELENBP1
FERMT2	FERM Domain Containing Kindlin 2	Protein Coding	45	GC14M052857	2.48417	https://www.genecards.org/cgi-bin/carddisp.pl?gene=FERMT2
ATM	ATM Serine/Threonine Kinase	Protein Coding	60	GC11P108222	2.48411	https://www.genecards.org/cgi-bin/carddisp.pl?gene=ATM
CD109	CD109 Molecule	Protein Coding	47	GC06P092642	2.48218	https://www.genecards.org/cgi-bin/carddisp.pl?gene=CD109
MYCN	MYCN Proto-Oncogene, BHLH Transcription Factor	Protein Coding	53	GC02P015954	2.48182	https://www.genecards.org/cgi-bin/carddisp.pl?gene=MYCN
FBXO17	F-Box Protein 17	Protein Coding	36	GC19M038941	2.48101	https://www.genecards.org/cgi-bin/carddisp.pl?gene=FBXO17
RPS8	Ribosomal Protein S8	Protein Coding	45	GC01P044775	2.47838	https://www.genecards.org/cgi-bin/carddisp.pl?gene=RPS8
TSG101	Tumor Susceptibility 101	Protein Coding	49	GC11M018468	2.47615	https://www.genecards.org/cgi-bin/carddisp.pl?gene=TSG101
UPF1	UPF1 RNA Helicase And ATPase	Protein Coding	47	GC19P018831	2.47532	https://www.genecards.org/cgi-bin/carddisp.pl?gene=UPF1
FBXO11	F-Box Protein 11	Protein Coding	48	GC02M047789	2.47483	https://www.genecards.org/cgi-bin/carddisp.pl?gene=FBXO11
RPA1	Replication Protein A1	Protein Coding	53	GC17P001829	2.47448	https://www.genecards.org/cgi-bin/carddisp.pl?gene=RPA1
CD70	CD70 Molecule	Protein Coding	51	GC19M007228	2.47345	https://www.genecards.org/cgi-bin/carddisp.pl?gene=CD70
ZNF638	Zinc Finger Protein 638	Protein Coding	44	GC02P071276	2.47171	https://www.genecards.org/cgi-bin/carddisp.pl?gene=ZNF638
CLEC4G	C-Type Lectin Domain Family 4 Member G	Protein Coding	44	GC19M007728	2.47148	https://www.genecards.org/cgi-bin/carddisp.pl?gene=CLEC4G
ATP5F1A	ATP Synthase F1 Subunit Alpha	Protein Coding	52	GC18M046081	2.47125	https://www.genecards.org/cgi-bin/carddisp.pl?gene=ATP5F1A
COL4A2	Collagen Type IV Alpha 2 Chain	Protein Coding	53	GC13P110305	2.47054	https://www.genecards.org/cgi-bin/carddisp.pl?gene=COL4A2
CIB1	Calcium And Integrin Binding 1	Protein Coding	48	GC15M090229	2.46951	https://www.genecards.org/cgi-bin/carddisp.pl?gene=CIB1
CHI3L2	Chitinase 3 Like 2	Protein Coding	44	GC01P111201	2.46797	https://www.genecards.org/cgi-bin/carddisp.pl?gene=CHI3L2
EMP2	Epithelial Membrane Protein 2	Protein Coding	50	GC16M010541	2.46792	https://www.genecards.org/cgi-bin/carddisp.pl?gene=EMP2
MIR138-2	MicroRNA 138-2	RNA Gene	22	GC16P057157	2.46752	https://www.genecards.org/cgi-bin/carddisp.pl?gene=MIR138-2
SLC9A1	Solute Carrier Family 9 Member A1	Protein Coding	57	GC01M027239	2.46244	https://www.genecards.org/cgi-bin/carddisp.pl?gene=SLC9A1
OXTR	Oxytocin Receptor	Protein Coding	53	GC03M008767	2.45961	https://www.genecards.org/cgi-bin/carddisp.pl?gene=OXTR
PABPC4	Poly(A) Binding Protein Cytoplasmic 4	Protein Coding	47	GC01M039560	2.45876	https://www.genecards.org/cgi-bin/carddisp.pl?gene=PABPC4
ANGPTL2	Angiopoietin Like 2	Protein Coding	44	GC09M127087	2.45543	https://www.genecards.org/cgi-bin/carddisp.pl?gene=ANGPTL2
RPS27A	Ribosomal Protein S27a	Protein Coding	48	GC02P055231	2.45536	https://www.genecards.org/cgi-bin/carddisp.pl?gene=RPS27A
SERBP1	SERPINE1 MRNA Binding Protein 1	Protein Coding	43	GC01M067407	2.45508	https://www.genecards.org/cgi-bin/carddisp.pl?gene=SERBP1
ECT2	Epithelial Cell Transforming 2	Protein Coding	47	GC03P172750	2.45341	https://www.genecards.org/cgi-bin/carddisp.pl?gene=ECT2
CA1	Carbonic Anhydrase 1	Protein Coding	54	GC08M085327	2.45287	https://www.genecards.org/cgi-bin/carddisp.pl?gene=CA1
NBR2	Neighbor Of BRCA1 LncRNA 2	RNA Gene	27	GC17P043125	2.45199	https://www.genecards.org/cgi-bin/carddisp.pl?gene=NBR2
IQGAP1	IQ Motif Containing GTPase Activating Protein 1	Protein Coding	50	GC15P090388	2.44902	https://www.genecards.org/cgi-bin/carddisp.pl?gene=IQGAP1
TNS1	Tensin 1	Protein Coding	46	GC02M217799	2.4487	https://www.genecards.org/cgi-bin/carddisp.pl?gene=TNS1
XRCC6	X-Ray Repair Cross Complementing 6	Protein Coding	52	GC22P045321	2.44727	https://www.genecards.org/cgi-bin/carddisp.pl?gene=XRCC6
HNRNPLL	Heterogeneous Nuclear Ribonucleoprotein L Like	Protein Coding	43	GC02M038561	2.44523	https://www.genecards.org/cgi-bin/carddisp.pl?gene=HNRNPLL
RPL34	Ribosomal Protein L34	Protein Coding	47	GC04P108620	2.44306	https://www.genecards.org/cgi-bin/carddisp.pl?gene=RPL34
EMP3	Epithelial Membrane Protein 3	Protein Coding	45	GC19P048321	2.44294	https://www.genecards.org/cgi-bin/carddisp.pl?gene=EMP3
GHRL	Ghrelin And Obestatin Prepropeptide	Protein Coding	49	GC03M010285	2.44241	https://www.genecards.org/cgi-bin/carddisp.pl?gene=GHRL
LGALS8	Galectin 8	Protein Coding	47	GC01P236518	2.43977	https://www.genecards.org/cgi-bin/carddisp.pl?gene=LGALS8
ETV4	ETS Variant Transcription Factor 4	Protein Coding	49	GC17M043527	2.43934	https://www.genecards.org/cgi-bin/carddisp.pl?gene=ETV4
OTULIN	OTU Deubiquitinase With Linear Linkage Specificity	Protein Coding	48	GC05P014667	2.43573	https://www.genecards.org/cgi-bin/carddisp.pl?gene=OTULIN
CCN3	Cellular Communication Network Factor 3	Protein Coding	47	GC08P119416	2.43501	https://www.genecards.org/cgi-bin/carddisp.pl?gene=CCN3
AMBP	Alpha-1-Microglobulin/Bikunin Precursor	Protein Coding	50	GC09M114060	2.43474	https://www.genecards.org/cgi-bin/carddisp.pl?gene=AMBP
SF3B1	Splicing Factor 3b Subunit 1	Protein Coding	52	GC02M197437	2.43472	https://www.genecards.org/cgi-bin/carddisp.pl?gene=SF3B1
OPRM1	Opioid Receptor Mu 1	Protein Coding	55	GC06P154123	2.43148	https://www.genecards.org/cgi-bin/carddisp.pl?gene=OPRM1
MACC1	MET Transcriptional Regulator MACC1	Protein Coding	42	GC07M020140	2.42731	https://www.genecards.org/cgi-bin/carddisp.pl?gene=MACC1
MIR28	MicroRNA 28	RNA Gene	21	GC03P188688	2.42621	https://www.genecards.org/cgi-bin/carddisp.pl?gene=MIR28
GPR15	G Protein-Coupled Receptor 15	Protein Coding	44	GC03P098531	2.42535	https://www.genecards.org/cgi-bin/carddisp.pl?gene=GPR15
KCTD7	Potassium Channel Tetramerization Domain Containing 7	Protein Coding	46	GC07P066628	2.42422	https://www.genecards.org/cgi-bin/carddisp.pl?gene=KCTD7
CHEK2	Checkpoint Kinase 2	Protein Coding	61	GC22M028687	2.42241	https://www.genecards.org/cgi-bin/carddisp.pl?gene=CHEK2
BMI1	BMI1 Proto-Oncogene, Polycomb Ring Finger	Protein Coding	50	GC10P022326	2.42189	https://www.genecards.org/cgi-bin/carddisp.pl?gene=BMI1
AZGP1	Alpha-2-Glycoprotein 1, Zinc-Binding	Protein Coding	51	GC07M099967	2.42017	https://www.genecards.org/cgi-bin/carddisp.pl?gene=AZGP1
HNRNPA1	Heterogeneous Nuclear Ribonucleoprotein A1	Protein Coding	55	GC12P054280	2.41908	https://www.genecards.org/cgi-bin/carddisp.pl?gene=HNRNPA1
NUS1	NUS1 Dehydrodolichyl Diphosphate Synthase Subunit	Protein Coding	46	GC06P117675	2.41826	https://www.genecards.org/cgi-bin/carddisp.pl?gene=NUS1
MFSD1	Major Facilitator Superfamily Domain Containing 1	Protein Coding	42	GC03P158733	2.41812	https://www.genecards.org/cgi-bin/carddisp.pl?gene=MFSD1
FHIT	Fragile Histidine Triad Diadenosine Triphosphatase	Protein Coding	51	GC03M059747	2.41668	https://www.genecards.org/cgi-bin/carddisp.pl?gene=FHIT
GAL	Galanin And GMAP Prepropeptide	Protein Coding	51	GC11P071097	2.41573	https://www.genecards.org/cgi-bin/carddisp.pl?gene=GAL
RPL14	Ribosomal Protein L14	Protein Coding	46	GC03P040458	2.41381	https://www.genecards.org/cgi-bin/carddisp.pl?gene=RPL14
CEACAM4	CEA Cell Adhesion Molecule 4	Protein Coding	40	GC19M070615	2.41207	https://www.genecards.org/cgi-bin/carddisp.pl?gene=CEACAM4
HUWE1	HECT, UBA And WWE Domain Containing E3 Ubiquitin Protein Ligase 1	Protein Coding	52	GC0XM053532	2.41093	https://www.genecards.org/cgi-bin/carddisp.pl?gene=HUWE1
CEP192	Centrosomal Protein 192	Protein Coding	42	GC18P018174	2.40991	https://www.genecards.org/cgi-bin/carddisp.pl?gene=CEP192
SULF2	Sulfatase 2	Protein Coding	46	GC20M047656	2.40921	https://www.genecards.org/cgi-bin/carddisp.pl?gene=SULF2
DEFB103B	Defensin Beta 103B	Protein Coding	32	GC08M007430	2.408	https://www.genecards.org/cgi-bin/carddisp.pl?gene=DEFB103B
MIR101-2	MicroRNA 101-2	RNA Gene	19	GC09P004867	2.40772	https://www.genecards.org/cgi-bin/carddisp.pl?gene=MIR101-2
KRT18	Keratin 18	Protein Coding	56	GC12P052948	2.40385	https://www.genecards.org/cgi-bin/carddisp.pl?gene=KRT18
IGF2BP3	Insulin Like Growth Factor 2 MRNA Binding Protein 3	Protein Coding	48	GC07M023354	2.40295	https://www.genecards.org/cgi-bin/carddisp.pl?gene=IGF2BP3
MIR146B	MicroRNA 146b	RNA Gene	24	GC10P102436	2.40148	https://www.genecards.org/cgi-bin/carddisp.pl?gene=MIR146B
MS4A4A	Membrane Spanning 4-Domains A4A	Protein Coding	39	GC11P060185	2.39977	https://www.genecards.org/cgi-bin/carddisp.pl?gene=MS4A4A
RALBP1	RalA Binding Protein 1	Protein Coding	51	GC18P009465	2.39953	https://www.genecards.org/cgi-bin/carddisp.pl?gene=RALBP1
RNF2	Ring Finger Protein 2	Protein Coding	51	GC01P185045	2.39939	https://www.genecards.org/cgi-bin/carddisp.pl?gene=RNF2
HTR2B	5-Hydroxytryptamine Receptor 2B	Protein Coding	50	GC02M231108	2.39761	https://www.genecards.org/cgi-bin/carddisp.pl?gene=HTR2B
MAP1B	Microtubule Associated Protein 1B	Protein Coding	51	GC05P072107	2.39699	https://www.genecards.org/cgi-bin/carddisp.pl?gene=MAP1B
HSPA9	Heat Shock Protein Family A (Hsp70) Member 9	Protein Coding	54	GC05M138554	2.39527	https://www.genecards.org/cgi-bin/carddisp.pl?gene=HSPA9
AKT1S1	AKT1 Substrate 1	Protein Coding	46	GC19M049869	2.39345	https://www.genecards.org/cgi-bin/carddisp.pl?gene=AKT1S1
MIR126	MicroRNA 126	RNA Gene	25	GC09P136670	2.39246	https://www.genecards.org/cgi-bin/carddisp.pl?gene=MIR126
CDX2	Caudal Type Homeobox 2	Protein Coding	48	GC13M027962	2.39145	https://www.genecards.org/cgi-bin/carddisp.pl?gene=CDX2
PGRMC2	Progesterone Receptor Membrane Component 2	Protein Coding	47	GC04M128269	2.3902	https://www.genecards.org/cgi-bin/carddisp.pl?gene=PGRMC2
SGMS2	Sphingomyelin Synthase 2	Protein Coding	44	GC04P107824	2.38592	https://www.genecards.org/cgi-bin/carddisp.pl?gene=SGMS2
TMSB10	Thymosin Beta 10	Protein Coding	43	GC02P084905	2.38563	https://www.genecards.org/cgi-bin/carddisp.pl?gene=TMSB10
DNM2	Dynamin 2	Protein Coding	56	GC19P010718	2.38393	https://www.genecards.org/cgi-bin/carddisp.pl?gene=DNM2
SNHG1	Small Nucleolar RNA Host Gene 1	RNA Gene	23	GC11M099597	2.38209	https://www.genecards.org/cgi-bin/carddisp.pl?gene=SNHG1
FGF9	Fibroblast Growth Factor 9	Protein Coding	51	GC13P021671	2.38197	https://www.genecards.org/cgi-bin/carddisp.pl?gene=FGF9
DPYD	Dihydropyrimidine Dehydrogenase	Protein Coding	59	GC01M097015	2.37933	https://www.genecards.org/cgi-bin/carddisp.pl?gene=DPYD
PSMD4	Proteasome 26S Subunit Ubiquitin Receptor, Non-ATPase 4	Protein Coding	50	GC01P151378	2.37911	https://www.genecards.org/cgi-bin/carddisp.pl?gene=PSMD4
NFATC3	Nuclear Factor Of Activated T Cells 3	Protein Coding	50	GC16P068119	2.37787	https://www.genecards.org/cgi-bin/carddisp.pl?gene=NFATC3
RPS23	Ribosomal Protein S23	Protein Coding	48	GC05M082273	2.37758	https://www.genecards.org/cgi-bin/carddisp.pl?gene=RPS23
SPC25	SPC25 Component Of NDC80 Kinetochore Complex	Protein Coding	39	GC02M168834	2.37561	https://www.genecards.org/cgi-bin/carddisp.pl?gene=SPC25
UQCC1	Ubiquinol-Cytochrome C Reductase Complex Assembly Factor 1	Protein Coding	43	GC20M035302	2.37363	https://www.genecards.org/cgi-bin/carddisp.pl?gene=UQCC1
TFE3	Transcription Factor Binding To IGHM Enhancer 3	Protein Coding	51	GC0XM049028	2.3714	https://www.genecards.org/cgi-bin/carddisp.pl?gene=TFE3
CMA1	Chymase 1	Protein Coding	51	GC14M024506	2.37108	https://www.genecards.org/cgi-bin/carddisp.pl?gene=CMA1
NAXE	NAD(P)HX Epimerase	Protein Coding	48	GC01P156591	2.37051	https://www.genecards.org/cgi-bin/carddisp.pl?gene=NAXE
ZFYVE9	Zinc Finger FYVE-Type Containing 9	Protein Coding	49	GC01P052142	2.37029	https://www.genecards.org/cgi-bin/carddisp.pl?gene=ZFYVE9
HYAL1	Hyaluronidase 1	Protein Coding	53	GC03M050299	2.36767	https://www.genecards.org/cgi-bin/carddisp.pl?gene=HYAL1
CDA	Cytidine Deaminase	Protein Coding	50	GC01P020588	2.36709	https://www.genecards.org/cgi-bin/carddisp.pl?gene=CDA
PDHX	Pyruvate Dehydrogenase Complex Component X	Protein Coding	52	GC11P034894	2.36661	https://www.genecards.org/cgi-bin/carddisp.pl?gene=PDHX
MIR4435-2HG	MIR4435-2 Host Gene	RNA Gene	21	GC02M111521	2.36661	https://www.genecards.org/cgi-bin/carddisp.pl?gene=MIR4435-2HG
LURAP1	Leucine Rich Adaptor Protein 1	Protein Coding	36	GC01P046203	2.36329	https://www.genecards.org/cgi-bin/carddisp.pl?gene=LURAP1
GANAB	Glucosidase II Alpha Subunit	Protein Coding	54	GC11M099585	2.36208	https://www.genecards.org/cgi-bin/carddisp.pl?gene=GANAB
GHR	Growth Hormone Receptor	Protein Coding	53	GC05P042429	2.36155	https://www.genecards.org/cgi-bin/carddisp.pl?gene=GHR
FTO	FTO Alpha-Ketoglutarate Dependent Dioxygenase	Protein Coding	53	GC16P053873	2.36151	https://www.genecards.org/cgi-bin/carddisp.pl?gene=FTO
GRP	Gastrin Releasing Peptide	Protein Coding	47	GC18P059220	2.35814	https://www.genecards.org/cgi-bin/carddisp.pl?gene=GRP
HBB	Hemoglobin Subunit Beta	Protein Coding	51	GC11M006827	2.35665	https://www.genecards.org/cgi-bin/carddisp.pl?gene=HBB
POLB	DNA Polymerase Beta	Protein Coding	51	GC08P042338	2.35587	https://www.genecards.org/cgi-bin/carddisp.pl?gene=POLB
ST3GAL3	ST3 Beta-Galactoside Alpha-2,3-Sialyltransferase 3	Protein Coding	53	GC01P043705	2.35583	https://www.genecards.org/cgi-bin/carddisp.pl?gene=ST3GAL3
REV1	REV1 DNA Directed Polymerase	Protein Coding	47	GC02M099383	2.35574	https://www.genecards.org/cgi-bin/carddisp.pl?gene=REV1
E2F4	E2F Transcription Factor 4	Protein Coding	51	GC16P067192	2.35565	https://www.genecards.org/cgi-bin/carddisp.pl?gene=E2F4
TGFBR3	Transforming Growth Factor Beta Receptor 3	Protein Coding	53	GC01M091680	2.35561	https://www.genecards.org/cgi-bin/carddisp.pl?gene=TGFBR3
PAEP	Progestagen Associated Endometrial Protein	Protein Coding	47	GC09P135561	2.35226	https://www.genecards.org/cgi-bin/carddisp.pl?gene=PAEP
UPK2	Uroplakin 2	Protein Coding	43	GC11P118925	2.34825	https://www.genecards.org/cgi-bin/carddisp.pl?gene=UPK2
CALML5	Calmodulin Like 5	Protein Coding	42	GC10M005498	2.34787	https://www.genecards.org/cgi-bin/carddisp.pl?gene=CALML5
NPTN	Neuroplastin	Protein Coding	48	GC15M073560	2.34752	https://www.genecards.org/cgi-bin/carddisp.pl?gene=NPTN
MIR375	MicroRNA 375	RNA Gene	22	GC02M219001	2.34671	https://www.genecards.org/cgi-bin/carddisp.pl?gene=MIR375
PPP3CA	Protein Phosphatase 3 Catalytic Subunit Alpha	Protein Coding	59	GC04M101024	2.34592	https://www.genecards.org/cgi-bin/carddisp.pl?gene=PPP3CA
TMEM259	Transmembrane Protein 259	Protein Coding	38	GC19M006500	2.34456	https://www.genecards.org/cgi-bin/carddisp.pl?gene=TMEM259
PFKFB3	6-Phosphofructo-2-Kinase/Fructose-2,6-Biphosphatase 3	Protein Coding	52	GC10P006144	2.34332	https://www.genecards.org/cgi-bin/carddisp.pl?gene=PFKFB3
IGH	Immunoglobulin Heavy Locus	Protein Coding	21	GC14M113318	2.34236	https://www.genecards.org/cgi-bin/carddisp.pl?gene=IGH
CTAG2	Cancer/Testis Antigen 2	Protein Coding	39	GC0XM154651	2.34194	https://www.genecards.org/cgi-bin/carddisp.pl?gene=CTAG2
CHST11	Carbohydrate Sulfotransferase 11	Protein Coding	50	GC12P104455	2.34192	https://www.genecards.org/cgi-bin/carddisp.pl?gene=CHST11
EIF2AK3	Eukaryotic Translation Initiation Factor 2 Alpha Kinase 3	Protein Coding	55	GC02M088556	2.34027	https://www.genecards.org/cgi-bin/carddisp.pl?gene=EIF2AK3
EIF4EBP1	Eukaryotic Translation Initiation Factor 4E Binding Protein 1	Protein Coding	53	GC08P038607	2.33601	https://www.genecards.org/cgi-bin/carddisp.pl?gene=EIF4EBP1
IL27RA	Interleukin 27 Receptor Subunit Alpha	Protein Coding	48	GC19P014031	2.33442	https://www.genecards.org/cgi-bin/carddisp.pl?gene=IL27RA
HTR7	5-Hydroxytryptamine Receptor 7	Protein Coding	53	GC10M090740	2.33423	https://www.genecards.org/cgi-bin/carddisp.pl?gene=HTR7
EEF2	Eukaryotic Translation Elongation Factor 2	Protein Coding	55	GC19M003976	2.33372	https://www.genecards.org/cgi-bin/carddisp.pl?gene=EEF2
ULK1	Unc-51 Like Autophagy Activating Kinase 1	Protein Coding	52	GC12P131894	2.33296	https://www.genecards.org/cgi-bin/carddisp.pl?gene=ULK1
RPL35A	Ribosomal Protein L35a	Protein Coding	50	GC03P197949	2.33264	https://www.genecards.org/cgi-bin/carddisp.pl?gene=RPL35A
GARS1	Glycyl-TRNA Synthetase 1	Protein Coding	52	GC07P030580	2.33208	https://www.genecards.org/cgi-bin/carddisp.pl?gene=GARS1
STK39	Serine/Threonine Kinase 39	Protein Coding	50	GC02M167954	2.33158	https://www.genecards.org/cgi-bin/carddisp.pl?gene=STK39
FNBP1	Formin Binding Protein 1	Protein Coding	44	GC09M129887	2.32941	https://www.genecards.org/cgi-bin/carddisp.pl?gene=FNBP1
CALML3	Calmodulin Like 3	Protein Coding	45	GC10P005556	2.32864	https://www.genecards.org/cgi-bin/carddisp.pl?gene=CALML3
ELOC	Elongin C	Protein Coding	48	GC08M073939	2.32692	https://www.genecards.org/cgi-bin/carddisp.pl?gene=ELOC
COL8A2	Collagen Type VIII Alpha 2 Chain	Protein Coding	47	GC01M036095	2.32609	https://www.genecards.org/cgi-bin/carddisp.pl?gene=COL8A2
BMPR1A	Bone Morphogenetic Protein Receptor Type 1A	Protein Coding	57	GC10P094521	2.32445	https://www.genecards.org/cgi-bin/carddisp.pl?gene=BMPR1A
KLRD1	Killer Cell Lectin Like Receptor D1	Protein Coding	48	GC12P010226	2.31713	https://www.genecards.org/cgi-bin/carddisp.pl?gene=KLRD1
ERBB4	Erb-B2 Receptor Tyrosine Kinase 4	Protein Coding	61	GC02M211375	2.31332	https://www.genecards.org/cgi-bin/carddisp.pl?gene=ERBB4
PTCH1	Patched 1	Protein Coding	57	GC09M095442	2.3133	https://www.genecards.org/cgi-bin/carddisp.pl?gene=PTCH1
CEP290	Centrosomal Protein 290	Protein Coding	48	GC12M088049	2.31232	https://www.genecards.org/cgi-bin/carddisp.pl?gene=CEP290
KRT14	Keratin 14	Protein Coding	53	GC17M041582	2.31106	https://www.genecards.org/cgi-bin/carddisp.pl?gene=KRT14
BLZF1	Basic Leucine Zipper Nuclear Factor 1	Protein Coding	45	GC01P169367	2.3102	https://www.genecards.org/cgi-bin/carddisp.pl?gene=BLZF1
NONO	Non-POU Domain Containing Octamer Binding	Protein Coding	52	GC0XP071255	2.30983	https://www.genecards.org/cgi-bin/carddisp.pl?gene=NONO
CUL3	Cullin 3	Protein Coding	54	GC02M224470	2.30663	https://www.genecards.org/cgi-bin/carddisp.pl?gene=CUL3
GLI3	GLI Family Zinc Finger 3	Protein Coding	56	GC07M041960	2.30656	https://www.genecards.org/cgi-bin/carddisp.pl?gene=GLI3
SIX1	SIX Homeobox 1	Protein Coding	49	GC14M060643	2.30636	https://www.genecards.org/cgi-bin/carddisp.pl?gene=SIX1
IRAG1	Inositol 1,4,5-Triphosphate Receptor Associated 1	Protein Coding	42	GC11M011135	2.30615	https://www.genecards.org/cgi-bin/carddisp.pl?gene=IRAG1
EPHB4	EPH Receptor B4	Protein Coding	60	GC07M102433	2.3047	https://www.genecards.org/cgi-bin/carddisp.pl?gene=EPHB4
DSE	Dermatan Sulfate Epimerase	Protein Coding	47	GC06P116255	2.30314	https://www.genecards.org/cgi-bin/carddisp.pl?gene=DSE
SSPN	Sarcospan	Protein Coding	42	GC12P026118	2.30241	https://www.genecards.org/cgi-bin/carddisp.pl?gene=SSPN
RPL35	Ribosomal Protein L35	Protein Coding	51	GC09M124857	2.3019	https://www.genecards.org/cgi-bin/carddisp.pl?gene=RPL35
PSMB4	Proteasome 20S Subunit Beta 4	Protein Coding	51	GC01P151399	2.30112	https://www.genecards.org/cgi-bin/carddisp.pl?gene=PSMB4
ARID2	AT-Rich Interaction Domain 2	Protein Coding	48	GC12P045729	2.30056	https://www.genecards.org/cgi-bin/carddisp.pl?gene=ARID2
MIR486-1	MicroRNA 486-1	RNA Gene	21	GC08M041660	2.2984	https://www.genecards.org/cgi-bin/carddisp.pl?gene=MIR486-1
BAMBI	BMP And Activin Membrane Bound Inhibitor	Protein Coding	50	GC10P028685	2.29761	https://www.genecards.org/cgi-bin/carddisp.pl?gene=BAMBI
ARID4B	AT-Rich Interaction Domain 4B	Protein Coding	43	GC01M235133	2.29678	https://www.genecards.org/cgi-bin/carddisp.pl?gene=ARID4B
EPHA2	EPH Receptor A2	Protein Coding	60	GC01M016124	2.29636	https://www.genecards.org/cgi-bin/carddisp.pl?gene=EPHA2
MIR20A	MicroRNA 20a	RNA Gene	22	GC13P091580	2.29624	https://www.genecards.org/cgi-bin/carddisp.pl?gene=MIR20A
MIR29A	MicroRNA 29a	RNA Gene	24	GC07M130876	2.29266	https://www.genecards.org/cgi-bin/carddisp.pl?gene=MIR29A
TOP1	DNA Topoisomerase I	Protein Coding	55	GC20P041028	2.29108	https://www.genecards.org/cgi-bin/carddisp.pl?gene=TOP1
SLC17A5	Solute Carrier Family 17 Member 5	Protein Coding	51	GC06M073593	2.29092	https://www.genecards.org/cgi-bin/carddisp.pl?gene=SLC17A5
G3BP2	G3BP Stress Granule Assembly Factor 2	Protein Coding	43	GC04M075642	2.28982	https://www.genecards.org/cgi-bin/carddisp.pl?gene=G3BP2
H2BC11	H2B Clustered Histone 11	Protein Coding	43	GC06M071394	2.28967	https://www.genecards.org/cgi-bin/carddisp.pl?gene=H2BC11
SKP2	S-Phase Kinase Associated Protein 2	Protein Coding	50	GC05P036151	2.28875	https://www.genecards.org/cgi-bin/carddisp.pl?gene=SKP2
CLDN7	Claudin 7	Protein Coding	46	GC17M007259	2.28448	https://www.genecards.org/cgi-bin/carddisp.pl?gene=CLDN7
PPP1CA	Protein Phosphatase 1 Catalytic Subunit Alpha	Protein Coding	53	GC11M099806	2.28325	https://www.genecards.org/cgi-bin/carddisp.pl?gene=PPP1CA
KTN1	Kinectin 1	Protein Coding	48	GC14P055559	2.28073	https://www.genecards.org/cgi-bin/carddisp.pl?gene=KTN1
MEIS1	Meis Homeobox 1	Protein Coding	48	GC02P066433	2.27915	https://www.genecards.org/cgi-bin/carddisp.pl?gene=MEIS1
SFN	Stratifin	Protein Coding	52	GC01P028391	2.27732	https://www.genecards.org/cgi-bin/carddisp.pl?gene=SFN
MC1R	Melanocortin 1 Receptor	Protein Coding	54	GC16P089912	2.27593	https://www.genecards.org/cgi-bin/carddisp.pl?gene=MC1R
FLNA	Filamin A	Protein Coding	55	GC0XM154348	2.27437	https://www.genecards.org/cgi-bin/carddisp.pl?gene=FLNA
GSTM2	Glutathione S-Transferase Mu 2	Protein Coding	48	GC01P109668	2.27404	https://www.genecards.org/cgi-bin/carddisp.pl?gene=GSTM2
SP140	SP140 Nuclear Body Protein	Protein Coding	43	GC02P230203	2.27008	https://www.genecards.org/cgi-bin/carddisp.pl?gene=SP140
EIF2S1	Eukaryotic Translation Initiation Factor 2 Subunit Alpha	Protein Coding	50	GC14P067359	2.26975	https://www.genecards.org/cgi-bin/carddisp.pl?gene=EIF2S1
SKP1	S-Phase Kinase Associated Protein 1	Protein Coding	51	GC05M134148	2.26613	https://www.genecards.org/cgi-bin/carddisp.pl?gene=SKP1
PHLDA1	Pleckstrin Homology Like Domain Family A Member 1	Protein Coding	41	GC12M076025	2.26393	https://www.genecards.org/cgi-bin/carddisp.pl?gene=PHLDA1
CDC6	Cell Division Cycle 6	Protein Coding	52	GC17P040287	2.26353	https://www.genecards.org/cgi-bin/carddisp.pl?gene=CDC6
KRT83	Keratin 83	Protein Coding	44	GC12M052314	2.26189	https://www.genecards.org/cgi-bin/carddisp.pl?gene=KRT83
KRT36	Keratin 36	Protein Coding	40	GC17M041486	2.26189	https://www.genecards.org/cgi-bin/carddisp.pl?gene=KRT36
NKX2-1	NK2 Homeobox 1	Protein Coding	53	GC14M036516	2.26082	https://www.genecards.org/cgi-bin/carddisp.pl?gene=NKX2-1
NEDD8	NEDD8 Ubiquitin Like Modifier	Protein Coding	46	GC14M024216	2.25879	https://www.genecards.org/cgi-bin/carddisp.pl?gene=NEDD8
PSEN2	Presenilin 2	Protein Coding	56	GC01P226870	2.25837	https://www.genecards.org/cgi-bin/carddisp.pl?gene=PSEN2
PFKL	Phosphofructokinase, Liver Type	Protein Coding	52	GC21P044300	2.25618	https://www.genecards.org/cgi-bin/carddisp.pl?gene=PFKL
MCCC2	Methylcrotonyl-CoA Carboxylase Subunit 2	Protein Coding	51	GC05P073552	2.25335	https://www.genecards.org/cgi-bin/carddisp.pl?gene=MCCC2
NUMA1	Nuclear Mitotic Apparatus Protein 1	Protein Coding	51	GC11M072002	2.24909	https://www.genecards.org/cgi-bin/carddisp.pl?gene=NUMA1
GCC2	GRIP And Coiled-Coil Domain Containing 2	Protein Coding	44	GC02P108432	2.24899	https://www.genecards.org/cgi-bin/carddisp.pl?gene=GCC2
TSPAN7	Tetraspanin 7	Protein Coding	52	GC0XP038561	2.24783	https://www.genecards.org/cgi-bin/carddisp.pl?gene=TSPAN7
SLAMF6	SLAM Family Member 6	Protein Coding	47	GC01M160454	2.24082	https://www.genecards.org/cgi-bin/carddisp.pl?gene=SLAMF6
POU2F1	POU Class 2 Homeobox 1	Protein Coding	50	GC01P167190	2.23963	https://www.genecards.org/cgi-bin/carddisp.pl?gene=POU2F1
MCRS1	Microspherule Protein 1	Protein Coding	44	GC12M049945	2.23891	https://www.genecards.org/cgi-bin/carddisp.pl?gene=MCRS1
USP24	Ubiquitin Specific Peptidase 24	Protein Coding	50	GC01M055066	2.23872	https://www.genecards.org/cgi-bin/carddisp.pl?gene=USP24
AQP1	Aquaporin 1 (Colton Blood Group)	Protein Coding	53	GC07P030911	2.23871	https://www.genecards.org/cgi-bin/carddisp.pl?gene=AQP1
FOXQ1	Forkhead Box Q1	Protein Coding	41	GC06P001312	2.23826	https://www.genecards.org/cgi-bin/carddisp.pl?gene=FOXQ1
SHOC2	SHOC2 Leucine Rich Repeat Scaffold Protein	Protein Coding	48	GC10P110919	2.23511	https://www.genecards.org/cgi-bin/carddisp.pl?gene=SHOC2
RPL17	Ribosomal Protein L17	Protein Coding	44	GC18M049488	2.23408	https://www.genecards.org/cgi-bin/carddisp.pl?gene=RPL17
PRKAB1	Protein Kinase AMP-Activated Non-Catalytic Subunit Beta 1	Protein Coding	53	GC12P119632	2.2332	https://www.genecards.org/cgi-bin/carddisp.pl?gene=PRKAB1
CREM	CAMP Responsive Element Modulator	Protein Coding	48	GC10P035126	2.23309	https://www.genecards.org/cgi-bin/carddisp.pl?gene=CREM
TFPI2	Tissue Factor Pathway Inhibitor 2	Protein Coding	49	GC07M093885	2.23087	https://www.genecards.org/cgi-bin/carddisp.pl?gene=TFPI2
ADIPOR1	Adiponectin Receptor 1	Protein Coding	51	GC01M202940	2.22954	https://www.genecards.org/cgi-bin/carddisp.pl?gene=ADIPOR1
PROX1	Prospero Homeobox 1	Protein Coding	49	GC01P213983	2.22758	https://www.genecards.org/cgi-bin/carddisp.pl?gene=PROX1
FOXC1	Forkhead Box C1	Protein Coding	48	GC06P001610	2.22686	https://www.genecards.org/cgi-bin/carddisp.pl?gene=FOXC1
CDCP1	CUB Domain Containing Protein 1	Protein Coding	46	GC03M045082	2.2267	https://www.genecards.org/cgi-bin/carddisp.pl?gene=CDCP1
TUBB3	Tubulin Beta 3 Class III	Protein Coding	55	GC16P091607	2.22627	https://www.genecards.org/cgi-bin/carddisp.pl?gene=TUBB3
AIFM1	Apoptosis Inducing Factor Mitochondria Associated 1	Protein Coding	56	GC0XM130129	2.22576	https://www.genecards.org/cgi-bin/carddisp.pl?gene=AIFM1
ESM1	Endothelial Cell Specific Molecule 1	Protein Coding	46	GC05M054977	2.22528	https://www.genecards.org/cgi-bin/carddisp.pl?gene=ESM1
USF1	Upstream Transcription Factor 1	Protein Coding	50	GC01M161039	2.22507	https://www.genecards.org/cgi-bin/carddisp.pl?gene=USF1
UCP1	Uncoupling Protein 1	Protein Coding	50	GC04M140559	2.22455	https://www.genecards.org/cgi-bin/carddisp.pl?gene=UCP1
EPB41L3	Erythrocyte Membrane Protein Band 4.1 Like 3	Protein Coding	48	GC18M005392	2.2228	https://www.genecards.org/cgi-bin/carddisp.pl?gene=EPB41L3
HCG18	HLA Complex Group 18	RNA Gene	19	GC06M071629	2.22245	https://www.genecards.org/cgi-bin/carddisp.pl?gene=HCG18
PAX8	Paired Box 8	Protein Coding	51	GC02M113215	2.22167	https://www.genecards.org/cgi-bin/carddisp.pl?gene=PAX8
NODAL	Nodal Growth Differentiation Factor	Protein Coding	48	GC10M070431	2.21845	https://www.genecards.org/cgi-bin/carddisp.pl?gene=NODAL
FBXW8	F-Box And WD Repeat Domain Containing 8	Protein Coding	41	GC12P116910	2.21622	https://www.genecards.org/cgi-bin/carddisp.pl?gene=FBXW8
PSD3	Pleckstrin And Sec7 Domain Containing 3	Protein Coding	44	GC08M018527	2.21613	https://www.genecards.org/cgi-bin/carddisp.pl?gene=PSD3
CCT3	Chaperonin Containing TCP1 Subunit 3	Protein Coding	47	GC01M156308	2.21537	https://www.genecards.org/cgi-bin/carddisp.pl?gene=CCT3
RPS10	Ribosomal Protein S10	Protein Coding	51	GC06M071853	2.21532	https://www.genecards.org/cgi-bin/carddisp.pl?gene=RPS10
KRT35	Keratin 35	Protein Coding	42	GC17M051747	2.21408	https://www.genecards.org/cgi-bin/carddisp.pl?gene=KRT35
FUT7	Fucosyltransferase 7	Protein Coding	48	GC09M137030	2.2138	https://www.genecards.org/cgi-bin/carddisp.pl?gene=FUT7
DSC1	Desmocollin 1	Protein Coding	46	GC18M031129	2.2134	https://www.genecards.org/cgi-bin/carddisp.pl?gene=DSC1
FKBP4	FKBP Prolyl Isomerase 4	Protein Coding	52	GC12P002795	2.21312	https://www.genecards.org/cgi-bin/carddisp.pl?gene=FKBP4
RPL36	Ribosomal Protein L36	Protein Coding	45	GC19P005674	2.21173	https://www.genecards.org/cgi-bin/carddisp.pl?gene=RPL36
ALDOA	Aldolase, Fructose-Bisphosphate A	Protein Coding	55	GC16P030064	2.21001	https://www.genecards.org/cgi-bin/carddisp.pl?gene=ALDOA
RBM4	RNA Binding Motif Protein 4	Protein Coding	45	GC11P066638	2.20945	https://www.genecards.org/cgi-bin/carddisp.pl?gene=RBM4
LILRB3	Leukocyte Immunoglobulin Like Receptor B3	Protein Coding	45	GC19M054216	2.20736	https://www.genecards.org/cgi-bin/carddisp.pl?gene=LILRB3
MECP2	Methyl-CpG Binding Protein 2	Protein Coding	53	GC0XM154021	2.20692	https://www.genecards.org/cgi-bin/carddisp.pl?gene=MECP2
ZC3HAV1	Zinc Finger CCCH-Type Containing, Antiviral 1	Protein Coding	44	GC07M139066	2.20403	https://www.genecards.org/cgi-bin/carddisp.pl?gene=ZC3HAV1
ANLN	Anillin, Actin Binding Protein	Protein Coding	50	GC07P036389	2.2031	https://www.genecards.org/cgi-bin/carddisp.pl?gene=ANLN
COL4A5	Collagen Type IV Alpha 5 Chain	Protein Coding	51	GC0XP108439	2.20217	https://www.genecards.org/cgi-bin/carddisp.pl?gene=COL4A5
TSPAN32	Tetraspanin 32	Protein Coding	42	GC11P002302	2.20204	https://www.genecards.org/cgi-bin/carddisp.pl?gene=TSPAN32
DUSP2	Dual Specificity Phosphatase 2	Protein Coding	46	GC02M098753	2.20166	https://www.genecards.org/cgi-bin/carddisp.pl?gene=DUSP2
KRT20	Keratin 20	Protein Coding	46	GC17M040875	2.20074	https://www.genecards.org/cgi-bin/carddisp.pl?gene=KRT20
SEPTIN9	Septin 9	Protein Coding	46	GC17P077282	2.19944	https://www.genecards.org/cgi-bin/carddisp.pl?gene=SEPTIN9
SOX9	SRY-Box Transcription Factor 9	Protein Coding	52	GC17P072121	2.19753	https://www.genecards.org/cgi-bin/carddisp.pl?gene=SOX9
FGF23	Fibroblast Growth Factor 23	Protein Coding	52	GC12M004368	2.19745	https://www.genecards.org/cgi-bin/carddisp.pl?gene=FGF23
ROR1	Receptor Tyrosine Kinase Like Orphan Receptor 1	Protein Coding	53	GC01P063774	2.19618	https://www.genecards.org/cgi-bin/carddisp.pl?gene=ROR1
ATAD3B	ATPase Family AAA Domain Containing 3B	Protein Coding	43	GC01P004386	2.19492	https://www.genecards.org/cgi-bin/carddisp.pl?gene=ATAD3B
PTPN13	Protein Tyrosine Phosphatase Non-Receptor Type 13	Protein Coding	51	GC04P086594	2.19395	https://www.genecards.org/cgi-bin/carddisp.pl?gene=PTPN13
RPS27	Ribosomal Protein S27	Protein Coding	49	GC01P153991	2.19392	https://www.genecards.org/cgi-bin/carddisp.pl?gene=RPS27
MSH2	MutS Homolog 2	Protein Coding	56	GC02P047403	2.19284	https://www.genecards.org/cgi-bin/carddisp.pl?gene=MSH2
MIR186	MicroRNA 186	RNA Gene	22	GC01M071067	2.19132	https://www.genecards.org/cgi-bin/carddisp.pl?gene=MIR186
PTH1R	Parathyroid Hormone 1 Receptor	Protein Coding	57	GC03P046877	2.18999	https://www.genecards.org/cgi-bin/carddisp.pl?gene=PTH1R
RBX1	Ring-Box 1	Protein Coding	50	GC22P040951	2.18976	https://www.genecards.org/cgi-bin/carddisp.pl?gene=RBX1
MIR101-1	MicroRNA 101-1	RNA Gene	22	GC01M065058	2.18944	https://www.genecards.org/cgi-bin/carddisp.pl?gene=MIR101-1
ZMYND8	Zinc Finger MYND-Type Containing 8	Protein Coding	47	GC20M047209	2.1884	https://www.genecards.org/cgi-bin/carddisp.pl?gene=ZMYND8
POU1F1	POU Class 1 Homeobox 1	Protein Coding	48	GC03M087259	2.18682	https://www.genecards.org/cgi-bin/carddisp.pl?gene=POU1F1
PREX1	Phosphatidylinositol-3,4,5-Trisphosphate Dependent Rac Exchange Factor 1	Protein Coding	50	GC20M048624	2.18639	https://www.genecards.org/cgi-bin/carddisp.pl?gene=PREX1
DLG1	Discs Large MAGUK Scaffold Protein 1	Protein Coding	50	GC03M197042	2.18464	https://www.genecards.org/cgi-bin/carddisp.pl?gene=DLG1
CXADR	CXADR Ig-Like Cell Adhesion Molecule	Protein Coding	50	GC21P017513	2.18409	https://www.genecards.org/cgi-bin/carddisp.pl?gene=CXADR
LOX	Lysyl Oxidase	Protein Coding	54	GC05M122063	2.18197	https://www.genecards.org/cgi-bin/carddisp.pl?gene=LOX
RPA2	Replication Protein A2	Protein Coding	50	GC01M028119	2.18078	https://www.genecards.org/cgi-bin/carddisp.pl?gene=RPA2
RUSC1-AS1	RUSC1 Antisense RNA 1	RNA Gene	30	GC01M155376	2.18031	https://www.genecards.org/cgi-bin/carddisp.pl?gene=RUSC1-AS1
ELK3	ETS Transcription Factor ELK3	Protein Coding	44	GC12P096194	2.18027	https://www.genecards.org/cgi-bin/carddisp.pl?gene=ELK3
CD24	CD24 Molecule	Protein Coding	41	GC06M106969	2.17897	https://www.genecards.org/cgi-bin/carddisp.pl?gene=CD24
DCST1-AS1	DCST1 Antisense RNA 1	RNA Gene	18	GC01M155351	2.17886	https://www.genecards.org/cgi-bin/carddisp.pl?gene=DCST1-AS1
PLS3	Plastin 3	Protein Coding	49	GC0XP115560	2.17833	https://www.genecards.org/cgi-bin/carddisp.pl?gene=PLS3
CGAS	Cyclic GMP-AMP Synthase	Protein Coding	42	GC06M073419	2.17799	https://www.genecards.org/cgi-bin/carddisp.pl?gene=CGAS
LRRC32	Leucine Rich Repeat Containing 32	Protein Coding	48	GC11M076657	2.17617	https://www.genecards.org/cgi-bin/carddisp.pl?gene=LRRC32
COL4A1	Collagen Type IV Alpha 1 Chain	Protein Coding	55	GC13M110148	2.17422	https://www.genecards.org/cgi-bin/carddisp.pl?gene=COL4A1
SERPINB5	Serpin Family B Member 5	Protein Coding	49	GC18P063476	2.16996	https://www.genecards.org/cgi-bin/carddisp.pl?gene=SERPINB5
MS4A1	Membrane Spanning 4-Domains A1	Protein Coding	55	GC11P060526	2.16931	https://www.genecards.org/cgi-bin/carddisp.pl?gene=MS4A1
NT5E	5'-Nucleotidase Ecto	Protein Coding	59	GC06P085449	2.16832	https://www.genecards.org/cgi-bin/carddisp.pl?gene=NT5E
MATR3	Matrin 3	Protein Coding	48	GC05P139274	2.16795	https://www.genecards.org/cgi-bin/carddisp.pl?gene=MATR3
MIR22	MicroRNA 22	RNA Gene	23	GC17M001713	2.16534	https://www.genecards.org/cgi-bin/carddisp.pl?gene=MIR22
CEACAM6	CEA Cell Adhesion Molecule 6	Protein Coding	48	GC19P041750	2.16527	https://www.genecards.org/cgi-bin/carddisp.pl?gene=CEACAM6
SYNCRIP	Synaptotagmin Binding Cytoplasmic RNA Interacting Protein	Protein Coding	46	GC06M085607	2.16394	https://www.genecards.org/cgi-bin/carddisp.pl?gene=SYNCRIP
TMPO	Thymopoietin	Protein Coding	53	GC12P098515	2.16351	https://www.genecards.org/cgi-bin/carddisp.pl?gene=TMPO
RBBP9	RB Binding Protein 9, Serine Hydrolase	Protein Coding	42	GC20M018486	2.15835	https://www.genecards.org/cgi-bin/carddisp.pl?gene=RBBP9
ST6GALNAC6	ST6 N-Acetylgalactosaminide Alpha-2,6-Sialyltransferase 6	Protein Coding	44	GC09M127894	2.15742	https://www.genecards.org/cgi-bin/carddisp.pl?gene=ST6GALNAC6
MAGED4B	MAGE Family Member D4B	Protein Coding	35	GC0XM052061	2.15667	https://www.genecards.org/cgi-bin/carddisp.pl?gene=MAGED4B
MAP1LC3B	Microtubule Associated Protein 1 Light Chain 3 Beta	Protein Coding	48	GC16P087384	2.1528	https://www.genecards.org/cgi-bin/carddisp.pl?gene=MAP1LC3B
H3C14	H3 Clustered Histone 14	Protein Coding	40	GC01M152690	2.1484	https://www.genecards.org/cgi-bin/carddisp.pl?gene=H3C14
MIR340	MicroRNA 340	RNA Gene	21	GC05M180015	2.14765	https://www.genecards.org/cgi-bin/carddisp.pl?gene=MIR340
ANXA3	Annexin A3	Protein Coding	49	GC04P078551	2.14674	https://www.genecards.org/cgi-bin/carddisp.pl?gene=ANXA3
TNFRSF4	TNF Receptor Superfamily Member 4	Protein Coding	50	GC01M001211	2.14645	https://www.genecards.org/cgi-bin/carddisp.pl?gene=TNFRSF4
SULT1A1	Sulfotransferase Family 1A Member 1	Protein Coding	50	GC16M038249	2.14515	https://www.genecards.org/cgi-bin/carddisp.pl?gene=SULT1A1
MYDGF	Myeloid Derived Growth Factor	Protein Coding	42	GC19M004641	2.14296	https://www.genecards.org/cgi-bin/carddisp.pl?gene=MYDGF
ALKBH5	AlkB Homolog 5, RNA Demethylase	Protein Coding	40	GC17P018183	2.14295	https://www.genecards.org/cgi-bin/carddisp.pl?gene=ALKBH5
SIGLEC8	Sialic Acid Binding Ig Like Lectin 8	Protein Coding	48	GC19M051450	2.14001	https://www.genecards.org/cgi-bin/carddisp.pl?gene=SIGLEC8
PHF20	PHD Finger Protein 20	Protein Coding	44	GC20P035771	2.13962	https://www.genecards.org/cgi-bin/carddisp.pl?gene=PHF20
ERBB3	Erb-B2 Receptor Tyrosine Kinase 3	Protein Coding	60	GC12P057479	2.13934	https://www.genecards.org/cgi-bin/carddisp.pl?gene=ERBB3
WNT4	Wnt Family Member 4	Protein Coding	53	GC01M022190	2.13834	https://www.genecards.org/cgi-bin/carddisp.pl?gene=WNT4
RAD51	RAD51 Recombinase	Protein Coding	57	GC15P040694	2.13742	https://www.genecards.org/cgi-bin/carddisp.pl?gene=RAD51
LMO4	LIM Domain Only 4	Protein Coding	45	GC01P087329	2.1341	https://www.genecards.org/cgi-bin/carddisp.pl?gene=LMO4
TBXT	T-Box Transcription Factor T	Protein Coding	50	GC06M166158	2.13365	https://www.genecards.org/cgi-bin/carddisp.pl?gene=TBXT
MAP2	Microtubule Associated Protein 2	Protein Coding	51	GC02P209424	2.13262	https://www.genecards.org/cgi-bin/carddisp.pl?gene=MAP2
SBSN	Suprabasin	Protein Coding	39	GC19M073250	2.13094	https://www.genecards.org/cgi-bin/carddisp.pl?gene=SBSN
GZMA	Granzyme A	Protein Coding	50	GC05P055102	2.12842	https://www.genecards.org/cgi-bin/carddisp.pl?gene=GZMA
CANT1	Calcium Activated Nucleotidase 1	Protein Coding	51	GC17M078992	2.12722	https://www.genecards.org/cgi-bin/carddisp.pl?gene=CANT1
CLDN1	Claudin 1	Protein Coding	53	GC03M190305	2.12707	https://www.genecards.org/cgi-bin/carddisp.pl?gene=CLDN1
MIR30A	MicroRNA 30a	RNA Gene	22	GC06M071403	2.12219	https://www.genecards.org/cgi-bin/carddisp.pl?gene=MIR30A
BTN3A1	Butyrophilin Subfamily 3 Member A1	Protein Coding	46	GC06P026402	2.12136	https://www.genecards.org/cgi-bin/carddisp.pl?gene=BTN3A1
TEX264	Testis Expressed 264, ER-Phagy Receptor	Protein Coding	41	GC03P051663	2.12094	https://www.genecards.org/cgi-bin/carddisp.pl?gene=TEX264
RBM38	RNA Binding Motif Protein 38	Protein Coding	43	GC20P057391	2.12041	https://www.genecards.org/cgi-bin/carddisp.pl?gene=RBM38
EIF5A	Eukaryotic Translation Initiation Factor 5A	Protein Coding	51	GC17P007306	2.11968	https://www.genecards.org/cgi-bin/carddisp.pl?gene=EIF5A
PLXNA4	Plexin A4	Protein Coding	47	GC07M132123	2.11824	https://www.genecards.org/cgi-bin/carddisp.pl?gene=PLXNA4
ERCC1	ERCC Excision Repair 1, Endonuclease Non-Catalytic Subunit	Protein Coding	52	GC19M070729	2.11818	https://www.genecards.org/cgi-bin/carddisp.pl?gene=ERCC1
IGFBP4	Insulin Like Growth Factor Binding Protein 4	Protein Coding	51	GC17P040443	2.11749	https://www.genecards.org/cgi-bin/carddisp.pl?gene=IGFBP4
PRMT5	Protein Arginine Methyltransferase 5	Protein Coding	53	GC14M022920	2.11702	https://www.genecards.org/cgi-bin/carddisp.pl?gene=PRMT5
MCAM	Melanoma Cell Adhesion Molecule	Protein Coding	49	GC11M119308	2.11668	https://www.genecards.org/cgi-bin/carddisp.pl?gene=MCAM
BABAM2	BRISC And BRCA1 A Complex Member 2	Protein Coding	44	GC02P028039	2.1165	https://www.genecards.org/cgi-bin/carddisp.pl?gene=BABAM2
UCHL1	Ubiquitin C-Terminal Hydrolase L1	Protein Coding	59	GC04P041256	2.11497	https://www.genecards.org/cgi-bin/carddisp.pl?gene=UCHL1
DGAT1	Diacylglycerol O-Acyltransferase 1	Protein Coding	55	GC08M144325	2.11199	https://www.genecards.org/cgi-bin/carddisp.pl?gene=DGAT1
AXIN1	Axin 1	Protein Coding	53	GC16M000287	2.10968	https://www.genecards.org/cgi-bin/carddisp.pl?gene=AXIN1
GCC1	GRIP And Coiled-Coil Domain Containing 1	Protein Coding	42	GC07M127580	2.10735	https://www.genecards.org/cgi-bin/carddisp.pl?gene=GCC1
WWOX	WW Domain Containing Oxidoreductase	Protein Coding	52	GC16P078099	2.10635	https://www.genecards.org/cgi-bin/carddisp.pl?gene=WWOX
FBXO7	F-Box Protein 7	Protein Coding	50	GC22P032474	2.10538	https://www.genecards.org/cgi-bin/carddisp.pl?gene=FBXO7
NBR1	NBR1 Autophagy Cargo Receptor	Protein Coding	46	GC17P043170	2.10244	https://www.genecards.org/cgi-bin/carddisp.pl?gene=NBR1
KHK	Ketohexokinase	Protein Coding	52	GC02P027086	2.10132	https://www.genecards.org/cgi-bin/carddisp.pl?gene=KHK
TRG	T Cell Receptor Gamma Locus	Protein Coding	15	GC07M038240	2.10094	https://www.genecards.org/cgi-bin/carddisp.pl?gene=TRG
CD226	CD226 Molecule	Protein Coding	48	GC18M069831	2.10038	https://www.genecards.org/cgi-bin/carddisp.pl?gene=CD226
PIP5K1C	Phosphatidylinositol-4-Phosphate 5-Kinase Type 1 Gamma	Protein Coding	55	GC19M006822	2.10031	https://www.genecards.org/cgi-bin/carddisp.pl?gene=PIP5K1C
P4HB	Prolyl 4-Hydroxylase Subunit Beta	Protein Coding	56	GC17M081843	2.10031	https://www.genecards.org/cgi-bin/carddisp.pl?gene=P4HB
ALDH9A1	Aldehyde Dehydrogenase 9 Family Member A1	Protein Coding	49	GC01M165681	2.09988	https://www.genecards.org/cgi-bin/carddisp.pl?gene=ALDH9A1
HSD17B10	Hydroxysteroid 17-Beta Dehydrogenase 10	Protein Coding	53	GC0XM053431	2.09761	https://www.genecards.org/cgi-bin/carddisp.pl?gene=HSD17B10
EIF2D	Eukaryotic Translation Initiation Factor 2D	Protein Coding	40	GC01M206571	2.09679	https://www.genecards.org/cgi-bin/carddisp.pl?gene=EIF2D
TPI1	Triosephosphate Isomerase 1	Protein Coding	54	GC12P006867	2.09674	https://www.genecards.org/cgi-bin/carddisp.pl?gene=TPI1
PDLIM5	PDZ And LIM Domain 5	Protein Coding	47	GC04P094451	2.09635	https://www.genecards.org/cgi-bin/carddisp.pl?gene=PDLIM5
GPRC5B	G Protein-Coupled Receptor Class C Group 5 Member B	Protein Coding	46	GC16M019856	2.09533	https://www.genecards.org/cgi-bin/carddisp.pl?gene=GPRC5B
SAMD9	Sterile Alpha Motif Domain Containing 9	Protein Coding	42	GC07M093099	2.09496	https://www.genecards.org/cgi-bin/carddisp.pl?gene=SAMD9
MIR1304	MicroRNA 1304	RNA Gene	18	GC11M100280	2.09481	https://www.genecards.org/cgi-bin/carddisp.pl?gene=MIR1304
BTF3	Basic Transcription Factor 3	Protein Coding	46	GC05P073498	2.09445	https://www.genecards.org/cgi-bin/carddisp.pl?gene=BTF3
NGFR	Nerve Growth Factor Receptor	Protein Coding	54	GC17P049495	2.09314	https://www.genecards.org/cgi-bin/carddisp.pl?gene=NGFR
ASGR2	Asialoglycoprotein Receptor 2	Protein Coding	47	GC17M007101	2.09197	https://www.genecards.org/cgi-bin/carddisp.pl?gene=ASGR2
DNAAF11	Dynein Axonemal Assembly Factor 11	Protein Coding	43	GC08M132637	2.09026	https://www.genecards.org/cgi-bin/carddisp.pl?gene=DNAAF11
ASS1	Argininosuccinate Synthase 1	Protein Coding	56	GC09P130444	2.09001	https://www.genecards.org/cgi-bin/carddisp.pl?gene=ASS1
MTA2	Metastasis Associated 1 Family Member 2	Protein Coding	47	GC11M099581	2.08894	https://www.genecards.org/cgi-bin/carddisp.pl?gene=MTA2
PTGIS	Prostaglandin I2 Synthase	Protein Coding	52	GC20M049503	2.08709	https://www.genecards.org/cgi-bin/carddisp.pl?gene=PTGIS
ITGB8	Integrin Subunit Beta 8	Protein Coding	48	GC07P020329	2.08682	https://www.genecards.org/cgi-bin/carddisp.pl?gene=ITGB8
OXT	Oxytocin/Neurophysin I Prepropeptide	Protein Coding	44	GC20P004488	2.08385	https://www.genecards.org/cgi-bin/carddisp.pl?gene=OXT
ITPA	Inosine Triphosphatase	Protein Coding	52	GC20P004503	2.0835	https://www.genecards.org/cgi-bin/carddisp.pl?gene=ITPA
KLRG1	Killer Cell Lectin Like Receptor G1	Protein Coding	45	GC12P008950	2.07673	https://www.genecards.org/cgi-bin/carddisp.pl?gene=KLRG1
NPY	Neuropeptide Y	Protein Coding	51	GC07P024290	2.07673	https://www.genecards.org/cgi-bin/carddisp.pl?gene=NPY
EDNRA	Endothelin Receptor Type A	Protein Coding	56	GC04P147480	2.07556	https://www.genecards.org/cgi-bin/carddisp.pl?gene=EDNRA
GLIPR1	GLI Pathogenesis Related 1	Protein Coding	46	GC12P075480	2.07456	https://www.genecards.org/cgi-bin/carddisp.pl?gene=GLIPR1
TUBA3C	Tubulin Alpha 3c	Protein Coding	43	GC13M019173	2.07294	https://www.genecards.org/cgi-bin/carddisp.pl?gene=TUBA3C
ACVR1	Activin A Receptor Type 1	Protein Coding	59	GC02M157736	2.07259	https://www.genecards.org/cgi-bin/carddisp.pl?gene=ACVR1
DANCR	Differentiation Antagonizing Non-Protein Coding RNA	RNA Gene	27	GC04P052712	2.07211	https://www.genecards.org/cgi-bin/carddisp.pl?gene=DANCR
ANO1	Anoctamin 1	Protein Coding	51	GC11P071150	2.07126	https://www.genecards.org/cgi-bin/carddisp.pl?gene=ANO1
HBG2	Hemoglobin Subunit Gamma 2	Protein Coding	47	GC11M006835	2.07044	https://www.genecards.org/cgi-bin/carddisp.pl?gene=HBG2
OSMR	Oncostatin M Receptor	Protein Coding	52	GC05P038845	2.07003	https://www.genecards.org/cgi-bin/carddisp.pl?gene=OSMR
SPEF2	Sperm Flagellar 2	Protein Coding	41	GC05P035618	2.06989	https://www.genecards.org/cgi-bin/carddisp.pl?gene=SPEF2
TPBG	Trophoblast Glycoprotein	Protein Coding	47	GC06P092718	2.06865	https://www.genecards.org/cgi-bin/carddisp.pl?gene=TPBG
ANTXR1	ANTXR Cell Adhesion Molecule 1	Protein Coding	52	GC02P068977	2.06675	https://www.genecards.org/cgi-bin/carddisp.pl?gene=ANTXR1
MIR195	MicroRNA 195	RNA Gene	22	GC17M007043	2.06372	https://www.genecards.org/cgi-bin/carddisp.pl?gene=MIR195
GNAS-AS1	GNAS Antisense RNA 1	RNA Gene	27	GC20M058811	2.06328	https://www.genecards.org/cgi-bin/carddisp.pl?gene=GNAS-AS1
BTN3A3	Butyrophilin Subfamily 3 Member A3	Protein Coding	42	GC06P091953	2.06325	https://www.genecards.org/cgi-bin/carddisp.pl?gene=BTN3A3
PTBP1	Polypyrimidine Tract Binding Protein 1	Protein Coding	50	GC19P000797	2.06201	https://www.genecards.org/cgi-bin/carddisp.pl?gene=PTBP1
CLEC2D	C-Type Lectin Domain Family 2 Member D	Protein Coding	45	GC12P023655	2.0601	https://www.genecards.org/cgi-bin/carddisp.pl?gene=CLEC2D
FEM1B	Fem-1 Homolog B	Protein Coding	46	GC15P123398	2.05878	https://www.genecards.org/cgi-bin/carddisp.pl?gene=FEM1B
PKD1	Polycystin 1, Transient Receptor Potential Channel Interacting	Protein Coding	52	GC16M008093	2.05861	https://www.genecards.org/cgi-bin/carddisp.pl?gene=PKD1
MIR214	MicroRNA 214	RNA Gene	25	GC01M172234	2.05856	https://www.genecards.org/cgi-bin/carddisp.pl?gene=MIR214
TNFAIP8L1	TNF Alpha Induced Protein 8 Like 1	Protein Coding	39	GC19P004639	2.05842	https://www.genecards.org/cgi-bin/carddisp.pl?gene=TNFAIP8L1
LEF1	Lymphoid Enhancer Binding Factor 1	Protein Coding	55	GC04M108047	2.05819	https://www.genecards.org/cgi-bin/carddisp.pl?gene=LEF1
NEDD4	NEDD4 E3 Ubiquitin Protein Ligase	Protein Coding	54	GC15M055826	2.05809	https://www.genecards.org/cgi-bin/carddisp.pl?gene=NEDD4
RAB37	RAB37, Member RAS Oncogene Family	Protein Coding	44	GC17P074671	2.05693	https://www.genecards.org/cgi-bin/carddisp.pl?gene=RAB37
SIRT4	Sirtuin 4	Protein Coding	48	GC12P120291	2.05671	https://www.genecards.org/cgi-bin/carddisp.pl?gene=SIRT4
TSC1	TSC Complex Subunit 1	Protein Coding	54	GC09M132891	2.05534	https://www.genecards.org/cgi-bin/carddisp.pl?gene=TSC1
SLC25A6	Solute Carrier Family 25 Member 6	Protein Coding	48	GC0XM001386	2.05385	https://www.genecards.org/cgi-bin/carddisp.pl?gene=SLC25A6
ST3GAL6	ST3 Beta-Galactoside Alpha-2,3-Sialyltransferase 6	Protein Coding	47	GC03P098732	2.05315	https://www.genecards.org/cgi-bin/carddisp.pl?gene=ST3GAL6
MAGEB2	MAGE Family Member B2	Protein Coding	39	GC0XP030215	2.05173	https://www.genecards.org/cgi-bin/carddisp.pl?gene=MAGEB2
CUL1	Cullin 1	Protein Coding	50	GC07P148697	2.05094	https://www.genecards.org/cgi-bin/carddisp.pl?gene=CUL1
PI4KB	Phosphatidylinositol 4-Kinase Beta	Protein Coding	51	GC01M151291	2.05021	https://www.genecards.org/cgi-bin/carddisp.pl?gene=PI4KB
KLHL13	Kelch Like Family Member 13	Protein Coding	43	GC0XM117897	2.04985	https://www.genecards.org/cgi-bin/carddisp.pl?gene=KLHL13
OGG1	8-Oxoguanine DNA Glycosylase	Protein Coding	53	GC03P013609	2.04807	https://www.genecards.org/cgi-bin/carddisp.pl?gene=OGG1
SPATA2	Spermatogenesis Associated 2	Protein Coding	40	GC20M049903	2.0456	https://www.genecards.org/cgi-bin/carddisp.pl?gene=SPATA2
HSP90AA2P	Heat Shock Protein 90 Alpha Family Class A Member 2, Pseudogene	Pseudogene	26	GC11M027888	2.04504	https://www.genecards.org/cgi-bin/carddisp.pl?gene=HSP90AA2P
FST	Follistatin	Protein Coding	55	GC05P053480	2.04392	https://www.genecards.org/cgi-bin/carddisp.pl?gene=FST
F8	Coagulation Factor VIII	Protein Coding	54	GC0XM154835	2.04306	https://www.genecards.org/cgi-bin/carddisp.pl?gene=F8
H2AC6	H2A Clustered Histone 6	Protein Coding	39	GC06P093032	2.04304	https://www.genecards.org/cgi-bin/carddisp.pl?gene=H2AC6
MDM4	MDM4 Regulator Of P53	Protein Coding	52	GC01P204516	2.04235	https://www.genecards.org/cgi-bin/carddisp.pl?gene=MDM4
ACTC1	Actin Alpha Cardiac Muscle 1	Protein Coding	51	GC15M034790	2.04066	https://www.genecards.org/cgi-bin/carddisp.pl?gene=ACTC1
CSGALNACT1	Chondroitin Sulfate N-Acetylgalactosaminyltransferase 1	Protein Coding	48	GC08M019404	2.03839	https://www.genecards.org/cgi-bin/carddisp.pl?gene=CSGALNACT1
CUL2	Cullin 2	Protein Coding	51	GC10M035046	2.03591	https://www.genecards.org/cgi-bin/carddisp.pl?gene=CUL2
FBH1	F-Box DNA Helicase 1	Protein Coding	39	GC10P005889	2.03283	https://www.genecards.org/cgi-bin/carddisp.pl?gene=FBH1
NPAS3	Neuronal PAS Domain Protein 3	Protein Coding	47	GC14P032934	2.03181	https://www.genecards.org/cgi-bin/carddisp.pl?gene=NPAS3
ALYREF	Aly/REF Export Factor	Protein Coding	44	GC17M081887	2.03121	https://www.genecards.org/cgi-bin/carddisp.pl?gene=ALYREF
NAT9	N-Acetyltransferase 9 (Putative)	Protein Coding	43	GC17M074770	2.03114	https://www.genecards.org/cgi-bin/carddisp.pl?gene=NAT9
DEK	DEK Proto-Oncogene	Protein Coding	47	GC06M018224	2.03092	https://www.genecards.org/cgi-bin/carddisp.pl?gene=DEK
SERPINB3	Serpin Family B Member 3	Protein Coding	47	GC18M063655	2.03006	https://www.genecards.org/cgi-bin/carddisp.pl?gene=SERPINB3
F5	Coagulation Factor V	Protein Coding	53	GC01M169511	2.02971	https://www.genecards.org/cgi-bin/carddisp.pl?gene=F5
TH	Tyrosine Hydroxylase	Protein Coding	57	GC11M002163	2.02961	https://www.genecards.org/cgi-bin/carddisp.pl?gene=TH
PBRM1	Polybromo 1	Protein Coding	51	GC03M052545	2.02584	https://www.genecards.org/cgi-bin/carddisp.pl?gene=PBRM1
FEN1	Flap Structure-Specific Endonuclease 1	Protein Coding	53	GC11P061793	2.02539	https://www.genecards.org/cgi-bin/carddisp.pl?gene=FEN1
LMO2	LIM Domain Only 2	Protein Coding	47	GC11M033858	2.02535	https://www.genecards.org/cgi-bin/carddisp.pl?gene=LMO2
DIABLO	Diablo IAP-Binding Mitochondrial Protein	Protein Coding	53	GC12M122497	2.02444	https://www.genecards.org/cgi-bin/carddisp.pl?gene=DIABLO
KLHDC8A	Kelch Domain Containing 8A	Protein Coding	40	GC01M205305	2.02362	https://www.genecards.org/cgi-bin/carddisp.pl?gene=KLHDC8A
COL4A3	Collagen Type IV Alpha 3 Chain	Protein Coding	53	GC02P227164	2.02079	https://www.genecards.org/cgi-bin/carddisp.pl?gene=COL4A3
KAT6A	Lysine Acetyltransferase 6A	Protein Coding	52	GC08M041929	2.01695	https://www.genecards.org/cgi-bin/carddisp.pl?gene=KAT6A
MCM3AP-AS1	MCM3AP Antisense RNA 1	RNA Gene	23	GC21P046229	2.0145	https://www.genecards.org/cgi-bin/carddisp.pl?gene=MCM3AP-AS1
EMD	Emerin	Protein Coding	52	GC0XP154379	2.01419	https://www.genecards.org/cgi-bin/carddisp.pl?gene=EMD
SLC9A3R1	SLC9A3 Regulator 1	Protein Coding	52	GC17P074749	2.01289	https://www.genecards.org/cgi-bin/carddisp.pl?gene=SLC9A3R1
RPL10	Ribosomal Protein L10	Protein Coding	50	GC0XP154389	2.01252	https://www.genecards.org/cgi-bin/carddisp.pl?gene=RPL10
KRR1	KRR1 Small Subunit Processome Component Homolog	Protein Coding	46	GC12M075490	2.01184	https://www.genecards.org/cgi-bin/carddisp.pl?gene=KRR1
SNAPIN	SNAP Associated Protein	Protein Coding	44	GC01P153660	2.01122	https://www.genecards.org/cgi-bin/carddisp.pl?gene=SNAPIN
TBXA2R	Thromboxane A2 Receptor	Protein Coding	56	GC19M003594	2.0098	https://www.genecards.org/cgi-bin/carddisp.pl?gene=TBXA2R
PTP4A3	Protein Tyrosine Phosphatase 4A3	Protein Coding	46	GC08P141391	2.00755	https://www.genecards.org/cgi-bin/carddisp.pl?gene=PTP4A3
HBD	Hemoglobin Subunit Delta	Protein Coding	46	GC11M005232	2.00659	https://www.genecards.org/cgi-bin/carddisp.pl?gene=HBD
SNAP23	Synaptosome Associated Protein 23	Protein Coding	48	GC15P042491	2.00634	https://www.genecards.org/cgi-bin/carddisp.pl?gene=SNAP23
MIRLET7D	MicroRNA Let-7d	RNA Gene	25	GC09P094178	2.0035	https://www.genecards.org/cgi-bin/carddisp.pl?gene=MIRLET7D
PRMT1	Protein Arginine Methyltransferase 1	Protein Coding	55	GC19P049675	2.00277	https://www.genecards.org/cgi-bin/carddisp.pl?gene=PRMT1
GRHL2	Grainyhead Like Transcription Factor 2	Protein Coding	47	GC08P101492	2.00275	https://www.genecards.org/cgi-bin/carddisp.pl?gene=GRHL2
ANXA10	Annexin A10	Protein Coding	40	GC04P168081	2.00236	https://www.genecards.org/cgi-bin/carddisp.pl?gene=ANXA10
MIR210	MicroRNA 210	RNA Gene	23	GC11M004426	2.00014	https://www.genecards.org/cgi-bin/carddisp.pl?gene=MIR210
CTTN	Cortactin	Protein Coding	50	GC11P070398	1.9984	https://www.genecards.org/cgi-bin/carddisp.pl?gene=CTTN
NTS	Neurotensin	Protein Coding	48	GC12P085876	1.99837	https://www.genecards.org/cgi-bin/carddisp.pl?gene=NTS
TMEM187	Transmembrane Protein 187	Protein Coding	35	GC0XP153972	1.99564	https://www.genecards.org/cgi-bin/carddisp.pl?gene=TMEM187
RPL24	Ribosomal Protein L24	Protein Coding	46	GC03M101681	1.99545	https://www.genecards.org/cgi-bin/carddisp.pl?gene=RPL24
ERAP1	Endoplasmic Reticulum Aminopeptidase 1	Protein Coding	53	GC05M096760	1.99465	https://www.genecards.org/cgi-bin/carddisp.pl?gene=ERAP1
CUL7	Cullin 7	Protein Coding	47	GC06M043037	1.99431	https://www.genecards.org/cgi-bin/carddisp.pl?gene=CUL7
ANXA2P2	Annexin A2 Pseudogene 2	Pseudogene	28	GC09P048917	1.99221	https://www.genecards.org/cgi-bin/carddisp.pl?gene=ANXA2P2
MIR193A	MicroRNA 193a	RNA Gene	22	GC17P031559	1.98939	https://www.genecards.org/cgi-bin/carddisp.pl?gene=MIR193A
AGMAT	Agmatinase	Protein Coding	45	GC01M015571	1.98781	https://www.genecards.org/cgi-bin/carddisp.pl?gene=AGMAT
FBXW9	F-Box And WD Repeat Domain Containing 9	Protein Coding	36	GC19M012688	1.98713	https://www.genecards.org/cgi-bin/carddisp.pl?gene=FBXW9
ADAMTS1	ADAM Metallopeptidase With Thrombospondin Type 1 Motif 1	Protein Coding	52	GC21M026835	1.98579	https://www.genecards.org/cgi-bin/carddisp.pl?gene=ADAMTS1
RPLP0	Ribosomal Protein Lateral Stalk Subunit P0	Protein Coding	48	GC12M120196	1.98546	https://www.genecards.org/cgi-bin/carddisp.pl?gene=RPLP0
ARL17A	ADP Ribosylation Factor Like GTPase 17A	Protein Coding	33	GC17M046499	1.98243	https://www.genecards.org/cgi-bin/carddisp.pl?gene=ARL17A
SDHD	Succinate Dehydrogenase Complex Subunit D	Protein Coding	51	GC11P112087	1.9822	https://www.genecards.org/cgi-bin/carddisp.pl?gene=SDHD
PIN1	Peptidylprolyl Cis/Trans Isomerase, NIMA-Interacting 1	Protein Coding	53	GC19P009835	1.98212	https://www.genecards.org/cgi-bin/carddisp.pl?gene=PIN1
SMURF1	SMAD Specific E3 Ubiquitin Protein Ligase 1	Protein Coding	52	GC07M099027	1.98182	https://www.genecards.org/cgi-bin/carddisp.pl?gene=SMURF1
CD37	CD37 Molecule	Protein Coding	50	GC19P049335	1.98123	https://www.genecards.org/cgi-bin/carddisp.pl?gene=CD37
HIPK2	Homeodomain Interacting Protein Kinase 2	Protein Coding	51	GC07M139561	1.97924	https://www.genecards.org/cgi-bin/carddisp.pl?gene=HIPK2
ACLY	ATP Citrate Lyase	Protein Coding	53	GC17M041866	1.9782	https://www.genecards.org/cgi-bin/carddisp.pl?gene=ACLY
FUCA1	Alpha-L-Fucosidase 1	Protein Coding	55	GC01M023845	1.97781	https://www.genecards.org/cgi-bin/carddisp.pl?gene=FUCA1
HNF4A	Hepatocyte Nuclear Factor 4 Alpha	Protein Coding	56	GC20P044355	1.97651	https://www.genecards.org/cgi-bin/carddisp.pl?gene=HNF4A
LUC7L3	LUC7 Like 3 Pre-MRNA Splicing Factor	Protein Coding	44	GC17P050719	1.97611	https://www.genecards.org/cgi-bin/carddisp.pl?gene=LUC7L3
CD164	CD164 Molecule	Protein Coding	48	GC06M109366	1.97507	https://www.genecards.org/cgi-bin/carddisp.pl?gene=CD164
POMGNT2	Protein O-Linked Mannose N-Acetylglucosaminyltransferase 2 (Beta 1,4-)	Protein Coding	44	GC03M043121	1.97406	https://www.genecards.org/cgi-bin/carddisp.pl?gene=POMGNT2
FOLH1	Folate Hydrolase 1	Protein Coding	54	GC11M099394	1.9727	https://www.genecards.org/cgi-bin/carddisp.pl?gene=FOLH1
KRT85	Keratin 85	Protein Coding	46	GC12M052361	1.97267	https://www.genecards.org/cgi-bin/carddisp.pl?gene=KRT85
SLC2A2	Solute Carrier Family 2 Member 2	Protein Coding	56	GC03M170996	1.97253	https://www.genecards.org/cgi-bin/carddisp.pl?gene=SLC2A2
HMGA1	High Mobility Group AT-Hook 1	Protein Coding	53	GC06P092259	1.97232	https://www.genecards.org/cgi-bin/carddisp.pl?gene=HMGA1
HBG1	Hemoglobin Subunit Gamma 1	Protein Coding	47	GC11M006834	1.97091	https://www.genecards.org/cgi-bin/carddisp.pl?gene=HBG1
MCM2	Minichromosome Maintenance Complex Component 2	Protein Coding	53	GC03P127598	1.97074	https://www.genecards.org/cgi-bin/carddisp.pl?gene=MCM2
FBXL17	F-Box And Leucine Rich Repeat Protein 17	Protein Coding	43	GC05M107859	1.96938	https://www.genecards.org/cgi-bin/carddisp.pl?gene=FBXL17
UBE2D2	Ubiquitin Conjugating Enzyme E2 D2	Protein Coding	49	GC05P139526	1.9684	https://www.genecards.org/cgi-bin/carddisp.pl?gene=UBE2D2
WNT2B	Wnt Family Member 2B	Protein Coding	51	GC01P112466	1.96816	https://www.genecards.org/cgi-bin/carddisp.pl?gene=WNT2B
GCNT2	Glucosaminyl (N-Acetyl) Transferase 2 (I Blood Group)	Protein Coding	50	GC06P010492	1.96799	https://www.genecards.org/cgi-bin/carddisp.pl?gene=GCNT2
SIK3	SIK Family Kinase 3	Protein Coding	48	GC11M116843	1.96724	https://www.genecards.org/cgi-bin/carddisp.pl?gene=SIK3
U2AF2	U2 Small Nuclear RNA Auxiliary Factor 2	Protein Coding	45	GC19P055654	1.96593	https://www.genecards.org/cgi-bin/carddisp.pl?gene=U2AF2
PTH	Parathyroid Hormone	Protein Coding	52	GC11M013492	1.96574	https://www.genecards.org/cgi-bin/carddisp.pl?gene=PTH
CKM	Creatine Kinase, M-Type	Protein Coding	51	GC19M045306	1.96571	https://www.genecards.org/cgi-bin/carddisp.pl?gene=CKM
KRT1	Keratin 1	Protein Coding	53	GC12M052674	1.96377	https://www.genecards.org/cgi-bin/carddisp.pl?gene=KRT1
SSTR2	Somatostatin Receptor 2	Protein Coding	53	GC17P073165	1.96129	https://www.genecards.org/cgi-bin/carddisp.pl?gene=SSTR2
MIR9-1	MicroRNA 9-1	RNA Gene	23	GC01M156420	1.9608	https://www.genecards.org/cgi-bin/carddisp.pl?gene=MIR9-1
E2F1	E2F Transcription Factor 1	Protein Coding	50	GC20M033675	1.96039	https://www.genecards.org/cgi-bin/carddisp.pl?gene=E2F1
CPE	Carboxypeptidase E	Protein Coding	52	GC04P165361	1.96031	https://www.genecards.org/cgi-bin/carddisp.pl?gene=CPE
ATP1B3	ATPase Na+/K+ Transporting Subunit Beta 3	Protein Coding	49	GC03P141876	1.95813	https://www.genecards.org/cgi-bin/carddisp.pl?gene=ATP1B3
CDH13	Cadherin 13	Protein Coding	51	GC16P082626	1.95716	https://www.genecards.org/cgi-bin/carddisp.pl?gene=CDH13
AKR1B10	Aldo-Keto Reductase Family 1 Member B10	Protein Coding	49	GC07P134527	1.95652	https://www.genecards.org/cgi-bin/carddisp.pl?gene=AKR1B10
PITPNM3	PITPNM Family Member 3	Protein Coding	46	GC17M006451	1.95361	https://www.genecards.org/cgi-bin/carddisp.pl?gene=PITPNM3
EED	Embryonic Ectoderm Development	Protein Coding	50	GC11P086244	1.95334	https://www.genecards.org/cgi-bin/carddisp.pl?gene=EED
MIR382	MicroRNA 382	RNA Gene	18	GC14P110918	1.95287	https://www.genecards.org/cgi-bin/carddisp.pl?gene=MIR382
PSMB3	Proteasome 20S Subunit Beta 3	Protein Coding	47	GC17P038752	1.95273	https://www.genecards.org/cgi-bin/carddisp.pl?gene=PSMB3
NRF1	Nuclear Respiratory Factor 1	Protein Coding	50	GC07P129611	1.95081	https://www.genecards.org/cgi-bin/carddisp.pl?gene=NRF1
P4HA3	Prolyl 4-Hydroxylase Subunit Alpha 3	Protein Coding	46	GC11M074235	1.95062	https://www.genecards.org/cgi-bin/carddisp.pl?gene=P4HA3
MIB1	MIB E3 Ubiquitin Protein Ligase 1	Protein Coding	51	GC18P021704	1.94842	https://www.genecards.org/cgi-bin/carddisp.pl?gene=MIB1
TNFRSF10D	TNF Receptor Superfamily Member 10d	Protein Coding	49	GC08M023135	1.94724	https://www.genecards.org/cgi-bin/carddisp.pl?gene=TNFRSF10D
GYPE	Glycophorin E (MNS Blood Group)	Protein Coding	35	GC04M143870	1.94231	https://www.genecards.org/cgi-bin/carddisp.pl?gene=GYPE
SATB1	SATB Homeobox 1	Protein Coding	51	GC03M021920	1.94131	https://www.genecards.org/cgi-bin/carddisp.pl?gene=SATB1
DKK1	Dickkopf WNT Signaling Pathway Inhibitor 1	Protein Coding	51	GC10P052314	1.93888	https://www.genecards.org/cgi-bin/carddisp.pl?gene=DKK1
SOX10	SRY-Box Transcription Factor 10	Protein Coding	52	GC22M063204	1.93827	https://www.genecards.org/cgi-bin/carddisp.pl?gene=SOX10
CREB3L4	CAMP Responsive Element Binding Protein 3 Like 4	Protein Coding	43	GC01P153967	1.93722	https://www.genecards.org/cgi-bin/carddisp.pl?gene=CREB3L4
A4GALT	Alpha 1,4-Galactosyltransferase (P Blood Group)	Protein Coding	49	GC22M042692	1.93691	https://www.genecards.org/cgi-bin/carddisp.pl?gene=A4GALT
SCGB2A2	Secretoglobin Family 2A Member 2	Protein Coding	43	GC11P062269	1.93667	https://www.genecards.org/cgi-bin/carddisp.pl?gene=SCGB2A2
UMPS	Uridine Monophosphate Synthetase	Protein Coding	53	GC03P124730	1.93574	https://www.genecards.org/cgi-bin/carddisp.pl?gene=UMPS
PDIA4	Protein Disulfide Isomerase Family A Member 4	Protein Coding	48	GC07M149003	1.93439	https://www.genecards.org/cgi-bin/carddisp.pl?gene=PDIA4
AURKA	Aurora Kinase A	Protein Coding	57	GC20M056370	1.93099	https://www.genecards.org/cgi-bin/carddisp.pl?gene=AURKA
AJUBA	Ajuba LIM Protein	Protein Coding	47	GC14M022971	1.9305	https://www.genecards.org/cgi-bin/carddisp.pl?gene=AJUBA
MSI2	Musashi RNA Binding Protein 2	Protein Coding	46	GC17P057255	1.92904	https://www.genecards.org/cgi-bin/carddisp.pl?gene=MSI2
CDH2	Cadherin 2	Protein Coding	59	GC18M028088	1.92737	https://www.genecards.org/cgi-bin/carddisp.pl?gene=CDH2
TUBA1A	Tubulin Alpha 1a	Protein Coding	56	GC12M049184	1.92705	https://www.genecards.org/cgi-bin/carddisp.pl?gene=TUBA1A
PRSS2	Serine Protease 2	Protein Coding	45	GC07P149968	1.92689	https://www.genecards.org/cgi-bin/carddisp.pl?gene=PRSS2
CUL9	Cullin 9	Protein Coding	46	GC06P043182	1.92684	https://www.genecards.org/cgi-bin/carddisp.pl?gene=CUL9
TGS1	Trimethylguanosine Synthase 1	Protein Coding	46	GC08P055773	1.9263	https://www.genecards.org/cgi-bin/carddisp.pl?gene=TGS1
ALDH3A1	Aldehyde Dehydrogenase 3 Family Member A1	Protein Coding	52	GC17M019737	1.92609	https://www.genecards.org/cgi-bin/carddisp.pl?gene=ALDH3A1
MED12	Mediator Complex Subunit 12	Protein Coding	50	GC0XP071118	1.92516	https://www.genecards.org/cgi-bin/carddisp.pl?gene=MED12
NECTIN4	Nectin Cell Adhesion Molecule 4	Protein Coding	52	GC01M161071	1.92375	https://www.genecards.org/cgi-bin/carddisp.pl?gene=NECTIN4
H4C3	H4 Clustered Histone 3	Protein Coding	44	GC06P091945	1.92361	https://www.genecards.org/cgi-bin/carddisp.pl?gene=H4C3
RUVBL1	RuvB Like AAA ATPase 1	Protein Coding	51	GC03M128064	1.92179	https://www.genecards.org/cgi-bin/carddisp.pl?gene=RUVBL1
IGFBP5	Insulin Like Growth Factor Binding Protein 5	Protein Coding	49	GC02M216672	1.9206	https://www.genecards.org/cgi-bin/carddisp.pl?gene=IGFBP5
LGALS4	Galectin 4	Protein Coding	44	GC19M070551	1.91858	https://www.genecards.org/cgi-bin/carddisp.pl?gene=LGALS4
WFDC2	WAP Four-Disulfide Core Domain 2	Protein Coding	44	GC20P045469	1.91744	https://www.genecards.org/cgi-bin/carddisp.pl?gene=WFDC2
MAD2L1	Mitotic Arrest Deficient 2 Like 1	Protein Coding	51	GC04M120055	1.91714	https://www.genecards.org/cgi-bin/carddisp.pl?gene=MAD2L1
CLUAP1	Clusterin Associated Protein 1	Protein Coding	42	GC16P013573	1.91621	https://www.genecards.org/cgi-bin/carddisp.pl?gene=CLUAP1
ICMT-DT	ICMT Divergent Transcript	RNA Gene	22	GC01P006240	1.9159	https://www.genecards.org/cgi-bin/carddisp.pl?gene=ICMT-DT
TOR1A	Torsin Family 1 Member A	Protein Coding	52	GC09M129812	1.91574	https://www.genecards.org/cgi-bin/carddisp.pl?gene=TOR1A
DDX6	DEAD-Box Helicase 6	Protein Coding	52	GC11M118748	1.91372	https://www.genecards.org/cgi-bin/carddisp.pl?gene=DDX6
ATP7A	ATPase Copper Transporting Alpha	Protein Coding	52	GC0XP078031	1.91302	https://www.genecards.org/cgi-bin/carddisp.pl?gene=ATP7A
SIGLEC6	Sialic Acid Binding Ig Like Lectin 6	Protein Coding	47	GC19M051517	1.91275	https://www.genecards.org/cgi-bin/carddisp.pl?gene=SIGLEC6
HPN	Hepsin	Protein Coding	51	GC19P035040	1.91257	https://www.genecards.org/cgi-bin/carddisp.pl?gene=HPN
MIR511	MicroRNA 511	RNA Gene	18	GC10P017845	1.9122	https://www.genecards.org/cgi-bin/carddisp.pl?gene=MIR511
ACKR1	Atypical Chemokine Receptor 1 (Duffy Blood Group)	Protein Coding	48	GC01P159203	1.912	https://www.genecards.org/cgi-bin/carddisp.pl?gene=ACKR1
EXT1	Exostosin Glycosyltransferase 1	Protein Coding	53	GC08M117798	1.91171	https://www.genecards.org/cgi-bin/carddisp.pl?gene=EXT1
MBD2	Methyl-CpG Binding Domain Protein 2	Protein Coding	47	GC18M054151	1.91137	https://www.genecards.org/cgi-bin/carddisp.pl?gene=MBD2
TJP1	Tight Junction Protein 1	Protein Coding	51	GC15M029699	1.91093	https://www.genecards.org/cgi-bin/carddisp.pl?gene=TJP1
LAMA1	Laminin Subunit Alpha 1	Protein Coding	52	GC18M006941	1.91039	https://www.genecards.org/cgi-bin/carddisp.pl?gene=LAMA1
CTBP1	C-Terminal Binding Protein 1	Protein Coding	53	GC04M001211	1.91037	https://www.genecards.org/cgi-bin/carddisp.pl?gene=CTBP1
HLF	HLF Transcription Factor, PAR BZIP Family Member	Protein Coding	45	GC17P055264	1.90756	https://www.genecards.org/cgi-bin/carddisp.pl?gene=HLF
NACA	Nascent Polypeptide Associated Complex Subunit Alpha	Protein Coding	45	GC12M056712	1.9014	https://www.genecards.org/cgi-bin/carddisp.pl?gene=NACA
FBXO42	F-Box Protein 42	Protein Coding	40	GC01M016373	1.90067	https://www.genecards.org/cgi-bin/carddisp.pl?gene=FBXO42
MUC6	Mucin 6, Oligomeric Mucus/Gel-Forming	Protein Coding	46	GC11M001012	1.89956	https://www.genecards.org/cgi-bin/carddisp.pl?gene=MUC6
PSMG1	Proteasome Assembly Chaperone 1	Protein Coding	44	GC21M039174	1.89855	https://www.genecards.org/cgi-bin/carddisp.pl?gene=PSMG1
HOXA9	Homeobox A9	Protein Coding	45	GC07M027162	1.89528	https://www.genecards.org/cgi-bin/carddisp.pl?gene=HOXA9
DIRAS3	DIRAS Family GTPase 3	Protein Coding	38	GC01M068045	1.89448	https://www.genecards.org/cgi-bin/carddisp.pl?gene=DIRAS3
SDC3	Syndecan 3	Protein Coding	50	GC01M030869	1.89247	https://www.genecards.org/cgi-bin/carddisp.pl?gene=SDC3
RORC	RAR Related Orphan Receptor C	Protein Coding	51	GC01M151806	1.89175	https://www.genecards.org/cgi-bin/carddisp.pl?gene=RORC
ZNF395	Zinc Finger Protein 395	Protein Coding	37	GC08M028345	1.88884	https://www.genecards.org/cgi-bin/carddisp.pl?gene=ZNF395
CCDC86	Coiled-Coil Domain Containing 86	Protein Coding	39	GC11P061024	1.88768	https://www.genecards.org/cgi-bin/carddisp.pl?gene=CCDC86
NDRG2	NDRG Family Member 2	Protein Coding	45	GC14M021016	1.88493	https://www.genecards.org/cgi-bin/carddisp.pl?gene=NDRG2
GAST	Gastrin	Protein Coding	46	GC17P041712	1.88454	https://www.genecards.org/cgi-bin/carddisp.pl?gene=GAST
XPC	XPC Complex Subunit, DNA Damage Recognition And Repair Factor	Protein Coding	52	GC03M021831	1.88445	https://www.genecards.org/cgi-bin/carddisp.pl?gene=XPC
KRT33B	Keratin 33B	Protein Coding	42	GC17M041363	1.88319	https://www.genecards.org/cgi-bin/carddisp.pl?gene=KRT33B
SATB2	SATB Homeobox 2	Protein Coding	51	GC02M199269	1.87788	https://www.genecards.org/cgi-bin/carddisp.pl?gene=SATB2
SMC1A	Structural Maintenance Of Chromosomes 1A	Protein Coding	54	GC0XM053374	1.87553	https://www.genecards.org/cgi-bin/carddisp.pl?gene=SMC1A
H4C8	H4 Clustered Histone 8	Protein Coding	41	GC06M072424	1.87495	https://www.genecards.org/cgi-bin/carddisp.pl?gene=H4C8
GLI2	GLI Family Zinc Finger 2	Protein Coding	56	GC02P120735	1.8741	https://www.genecards.org/cgi-bin/carddisp.pl?gene=GLI2
MCM3	Minichromosome Maintenance Complex Component 3	Protein Coding	51	GC06M052264	1.87236	https://www.genecards.org/cgi-bin/carddisp.pl?gene=MCM3
STAP2	Signal Transducing Adaptor Family Member 2	Protein Coding	44	GC19M004324	1.87224	https://www.genecards.org/cgi-bin/carddisp.pl?gene=STAP2
AHNAK	AHNAK Nucleoprotein	Protein Coding	44	GC11M099570	1.87127	https://www.genecards.org/cgi-bin/carddisp.pl?gene=AHNAK
WNT7B	Wnt Family Member 7B	Protein Coding	49	GC22M045920	1.87073	https://www.genecards.org/cgi-bin/carddisp.pl?gene=WNT7B
HYAL2	Hyaluronidase 2	Protein Coding	51	GC03M050317	1.86912	https://www.genecards.org/cgi-bin/carddisp.pl?gene=HYAL2
MIR497	MicroRNA 497	RNA Gene	22	GC17M007044	1.86867	https://www.genecards.org/cgi-bin/carddisp.pl?gene=MIR497
SMARCE1	SWI/SNF Related, Matrix Associated, Actin Dependent Regulator Of Chromatin, Subfamily E, Member 1	Protein Coding	51	GC17M040624	1.86748	https://www.genecards.org/cgi-bin/carddisp.pl?gene=SMARCE1
LIMS1	LIM Zinc Finger Domain Containing 1	Protein Coding	47	GC02P108534	1.86649	https://www.genecards.org/cgi-bin/carddisp.pl?gene=LIMS1
PMS2	PMS1 Homolog 2, Mismatch Repair System Component	Protein Coding	55	GC07M005973	1.86539	https://www.genecards.org/cgi-bin/carddisp.pl?gene=PMS2
CTSZ	Cathepsin Z	Protein Coding	52	GC20M058995	1.86521	https://www.genecards.org/cgi-bin/carddisp.pl?gene=CTSZ
F12	Coagulation Factor XII	Protein Coding	56	GC05M177402	1.86427	https://www.genecards.org/cgi-bin/carddisp.pl?gene=F12
KRT77	Keratin 77	Protein Coding	41	GC12M052689	1.8627	https://www.genecards.org/cgi-bin/carddisp.pl?gene=KRT77
TERF2IP	TERF2 Interacting Protein	Protein Coding	48	GC16P075647	1.86246	https://www.genecards.org/cgi-bin/carddisp.pl?gene=TERF2IP
RBBP8	RB Binding Protein 8, Endonuclease	Protein Coding	50	GC18P022798	1.86204	https://www.genecards.org/cgi-bin/carddisp.pl?gene=RBBP8
STMN1	Stathmin 1	Protein Coding	51	GC01M025884	1.8593	https://www.genecards.org/cgi-bin/carddisp.pl?gene=STMN1
CALD1	Caldesmon 1	Protein Coding	50	GC07P134744	1.85917	https://www.genecards.org/cgi-bin/carddisp.pl?gene=CALD1
MGAT3	Beta-1,4-Mannosyl-Glycoprotein 4-Beta-N-Acetylglucosaminyltransferase	Protein Coding	45	GC22P045199	1.85664	https://www.genecards.org/cgi-bin/carddisp.pl?gene=MGAT3
PSME2	Proteasome Activator Subunit 2	Protein Coding	48	GC14M024143	1.85479	https://www.genecards.org/cgi-bin/carddisp.pl?gene=PSME2
PALLD	Palladin, Cytoskeletal Associated Protein	Protein Coding	49	GC04P168497	1.85461	https://www.genecards.org/cgi-bin/carddisp.pl?gene=PALLD
PRUNE2	Prune Homolog 2 With BCH Domain	Protein Coding	43	GC09M076611	1.85173	https://www.genecards.org/cgi-bin/carddisp.pl?gene=PRUNE2
CAMKK2	Calcium/Calmodulin Dependent Protein Kinase Kinase 2	Protein Coding	54	GC12M122474	1.84814	https://www.genecards.org/cgi-bin/carddisp.pl?gene=CAMKK2
MTR	5-Methyltetrahydrofolate-Homocysteine Methyltransferase	Protein Coding	54	GC01P236795	1.84735	https://www.genecards.org/cgi-bin/carddisp.pl?gene=MTR
HMBS	Hydroxymethylbilane Synthase	Protein Coding	51	GC11P119084	1.84638	https://www.genecards.org/cgi-bin/carddisp.pl?gene=HMBS
PSMD2	Proteasome 26S Subunit Ubiquitin Receptor, Non-ATPase 2	Protein Coding	49	GC03P184298	1.84612	https://www.genecards.org/cgi-bin/carddisp.pl?gene=PSMD2
NAB2	NGFI-A Binding Protein 2	Protein Coding	48	GC12P057595	1.84519	https://www.genecards.org/cgi-bin/carddisp.pl?gene=NAB2
LINC01094	Long Intergenic Non-Protein Coding RNA 1094	RNA Gene	17	GC04P078727	1.8446	https://www.genecards.org/cgi-bin/carddisp.pl?gene=LINC01094
SIRT5	Sirtuin 5	Protein Coding	52	GC06P013574	1.84452	https://www.genecards.org/cgi-bin/carddisp.pl?gene=SIRT5
PROCR	Protein C Receptor	Protein Coding	49	GC20P035171	1.84427	https://www.genecards.org/cgi-bin/carddisp.pl?gene=PROCR
LUM	Lumican	Protein Coding	48	GC12M091102	1.842	https://www.genecards.org/cgi-bin/carddisp.pl?gene=LUM
SERF2	Small EDRK-Rich Factor 2	Protein Coding	36	GC15P043777	1.84167	https://www.genecards.org/cgi-bin/carddisp.pl?gene=SERF2
SYT13	Synaptotagmin 13	Protein Coding	41	GC11M045240	1.84102	https://www.genecards.org/cgi-bin/carddisp.pl?gene=SYT13
PHOX2B	Paired Like Homeobox 2B	Protein Coding	51	GC04M041746	1.84049	https://www.genecards.org/cgi-bin/carddisp.pl?gene=PHOX2B
TCP1	T-Complex 1	Protein Coding	49	GC06M159778	1.83958	https://www.genecards.org/cgi-bin/carddisp.pl?gene=TCP1
H4C15	H4 Clustered Histone 15	Protein Coding	34	GC01M152691	1.83922	https://www.genecards.org/cgi-bin/carddisp.pl?gene=H4C15
PPIL4	Peptidylprolyl Isomerase Like 4	Protein Coding	42	GC06M149504	1.83812	https://www.genecards.org/cgi-bin/carddisp.pl?gene=PPIL4
SEMA4C	Semaphorin 4C	Protein Coding	44	GC02M096859	1.83793	https://www.genecards.org/cgi-bin/carddisp.pl?gene=SEMA4C
FBXO38	F-Box Protein 38	Protein Coding	44	GC05P148383	1.83756	https://www.genecards.org/cgi-bin/carddisp.pl?gene=FBXO38
CMAS	Cytidine Monophosphate N-Acetylneuraminic Acid Synthetase	Protein Coding	43	GC12P022046	1.83745	https://www.genecards.org/cgi-bin/carddisp.pl?gene=CMAS
MIR30C2	MicroRNA 30c-2	RNA Gene	22	GC06M072315	1.83663	https://www.genecards.org/cgi-bin/carddisp.pl?gene=MIR30C2
BMPR1B	Bone Morphogenetic Protein Receptor Type 1B	Protein Coding	56	GC04P094757	1.83646	https://www.genecards.org/cgi-bin/carddisp.pl?gene=BMPR1B
CGB5	Chorionic Gonadotropin Subunit Beta 5	Protein Coding	37	GC19P049043	1.83584	https://www.genecards.org/cgi-bin/carddisp.pl?gene=CGB5
LETM1	Leucine Zipper And EF-Hand Containing Transmembrane Protein 1	Protein Coding	50	GC04M001811	1.83342	https://www.genecards.org/cgi-bin/carddisp.pl?gene=LETM1
GALNT4	Polypeptide N-Acetylgalactosaminyltransferase 4	Protein Coding	44	GC12M089520	1.8316	https://www.genecards.org/cgi-bin/carddisp.pl?gene=GALNT4
SYNC	Syncoilin, Intermediate Filament Protein	Protein Coding	39	GC01M032679	1.83155	https://www.genecards.org/cgi-bin/carddisp.pl?gene=SYNC
AGPS	Alkylglycerone Phosphate Synthase	Protein Coding	50	GC02P177392	1.83035	https://www.genecards.org/cgi-bin/carddisp.pl?gene=AGPS
NAAA	N-Acylethanolamine Acid Amidase	Protein Coding	49	GC04M075910	1.82913	https://www.genecards.org/cgi-bin/carddisp.pl?gene=NAAA
THBS2	Thrombospondin 2	Protein Coding	53	GC06M169215	1.82808	https://www.genecards.org/cgi-bin/carddisp.pl?gene=THBS2
ATR	ATR Serine/Threonine Kinase	Protein Coding	59	GC03M142449	1.82739	https://www.genecards.org/cgi-bin/carddisp.pl?gene=ATR
UBE2D3	Ubiquitin Conjugating Enzyme E2 D3	Protein Coding	52	GC04M102794	1.82699	https://www.genecards.org/cgi-bin/carddisp.pl?gene=UBE2D3
KDM4C	Lysine Demethylase 4C	Protein Coding	48	GC09P006720	1.82688	https://www.genecards.org/cgi-bin/carddisp.pl?gene=KDM4C
ATP1B1	ATPase Na+/K+ Transporting Subunit Beta 1	Protein Coding	54	GC01P169105	1.82441	https://www.genecards.org/cgi-bin/carddisp.pl?gene=ATP1B1
NIFK-AS1	NIFK Antisense RNA 1	RNA Gene	18	GC02P121649	1.82428	https://www.genecards.org/cgi-bin/carddisp.pl?gene=NIFK-AS1
ILK	Integrin Linked Kinase	Protein Coding	52	GC11P006604	1.8235	https://www.genecards.org/cgi-bin/carddisp.pl?gene=ILK
KIF1B	Kinesin Family Member 1B	Protein Coding	51	GC01P010210	1.82166	https://www.genecards.org/cgi-bin/carddisp.pl?gene=KIF1B
RGS1	Regulator Of G Protein Signaling 1	Protein Coding	45	GC01P192575	1.8215	https://www.genecards.org/cgi-bin/carddisp.pl?gene=RGS1
CROCC	Ciliary Rootlet Coiled-Coil, Rootletin	Protein Coding	42	GC01P018020	1.8197	https://www.genecards.org/cgi-bin/carddisp.pl?gene=CROCC
GADD45B	Growth Arrest And DNA Damage Inducible Beta	Protein Coding	43	GC19P002476	1.81927	https://www.genecards.org/cgi-bin/carddisp.pl?gene=GADD45B
SYNGAP1	Synaptic Ras GTPase Activating Protein 1	Protein Coding	53	GC06P092230	1.81851	https://www.genecards.org/cgi-bin/carddisp.pl?gene=SYNGAP1
FBXW5	F-Box And WD Repeat Domain Containing 5	Protein Coding	44	GC09M137755	1.81734	https://www.genecards.org/cgi-bin/carddisp.pl?gene=FBXW5
SHBG	Sex Hormone Binding Globulin	Protein Coding	48	GC17P007613	1.81615	https://www.genecards.org/cgi-bin/carddisp.pl?gene=SHBG
SMPX	Small Muscle Protein X-Linked	Protein Coding	42	GC0XM021706	1.81594	https://www.genecards.org/cgi-bin/carddisp.pl?gene=SMPX
CSNK1E	Casein Kinase 1 Epsilon	Protein Coding	53	GC22M061729	1.81574	https://www.genecards.org/cgi-bin/carddisp.pl?gene=CSNK1E
ZC3H10	Zinc Finger CCCH-Type Containing 10	Protein Coding	40	GC12P056118	1.81515	https://www.genecards.org/cgi-bin/carddisp.pl?gene=ZC3H10
FUT3	Fucosyltransferase 3 (Lewis Blood Group)	Protein Coding	47	GC19M006915	1.81334	https://www.genecards.org/cgi-bin/carddisp.pl?gene=FUT3
LAT	Linker For Activation Of T Cells	Protein Coding	53	GC16P042656	1.81278	https://www.genecards.org/cgi-bin/carddisp.pl?gene=LAT
MIRLET7A1	MicroRNA Let-7a-1	RNA Gene	23	GC09P094175	1.81232	https://www.genecards.org/cgi-bin/carddisp.pl?gene=MIRLET7A1
UCA1	Urothelial Cancer Associated 1	RNA Gene	26	GC19P015828	1.81219	https://www.genecards.org/cgi-bin/carddisp.pl?gene=UCA1
CTAGE1	Cutaneous T Cell Lymphoma-Associated Antigen 1	Protein Coding	40	GC18M022413	1.811	https://www.genecards.org/cgi-bin/carddisp.pl?gene=CTAGE1
PRDX5	Peroxiredoxin 5	Protein Coding	51	GC11P064460	1.81077	https://www.genecards.org/cgi-bin/carddisp.pl?gene=PRDX5
TSC22D2	TSC22 Domain Family Member 2	Protein Coding	42	GC03P150408	1.81059	https://www.genecards.org/cgi-bin/carddisp.pl?gene=TSC22D2
TCL1A	TCL1 Family AKT Coactivator A	Protein Coding	49	GC14M095709	1.809	https://www.genecards.org/cgi-bin/carddisp.pl?gene=TCL1A
ERBIN	Erbb2 Interacting Protein	Protein Coding	46	GC05P065884	1.80759	https://www.genecards.org/cgi-bin/carddisp.pl?gene=ERBIN
MGP	Matrix Gla Protein	Protein Coding	49	GC12M022700	1.80463	https://www.genecards.org/cgi-bin/carddisp.pl?gene=MGP
CRNDE	Colorectal Neoplasia Differentially Expressed	RNA Gene	25	GC16M054900	1.80456	https://www.genecards.org/cgi-bin/carddisp.pl?gene=CRNDE
LTV1	LTV1 Ribosome Biogenesis Factor	Protein Coding	40	GC06P143843	1.80302	https://www.genecards.org/cgi-bin/carddisp.pl?gene=LTV1
IGFBP3	Insulin Like Growth Factor Binding Protein 3	Protein Coding	54	GC07M045912	1.80184	https://www.genecards.org/cgi-bin/carddisp.pl?gene=IGFBP3
FZR1	Fizzy And Cell Division Cycle 20 Related 1	Protein Coding	48	GC19P003506	1.80135	https://www.genecards.org/cgi-bin/carddisp.pl?gene=FZR1
CDH3	Cadherin 3	Protein Coding	54	GC16P068637	1.7986	https://www.genecards.org/cgi-bin/carddisp.pl?gene=CDH3
C1R	Complement C1r	Protein Coding	53	GC12M007993	1.79702	https://www.genecards.org/cgi-bin/carddisp.pl?gene=C1R
GAR1	GAR1 Ribonucleoprotein	Protein Coding	45	GC04P109815	1.79702	https://www.genecards.org/cgi-bin/carddisp.pl?gene=GAR1
KRT33A	Keratin 33A	Protein Coding	41	GC17M041346	1.79702	https://www.genecards.org/cgi-bin/carddisp.pl?gene=KRT33A
CLIP1	CAP-Gly Domain Containing Linker Protein 1	Protein Coding	52	GC12M122271	1.79544	https://www.genecards.org/cgi-bin/carddisp.pl?gene=CLIP1
HOXB13	Homeobox B13	Protein Coding	48	GC17M052151	1.79509	https://www.genecards.org/cgi-bin/carddisp.pl?gene=HOXB13
KRT3	Keratin 3	Protein Coding	47	GC12M052789	1.79319	https://www.genecards.org/cgi-bin/carddisp.pl?gene=KRT3
CCNE1	Cyclin E1	Protein Coding	55	GC19P029811	1.79239	https://www.genecards.org/cgi-bin/carddisp.pl?gene=CCNE1
NECAB3	N-Terminal EF-Hand Calcium Binding Protein 3	Protein Coding	38	GC20M033659	1.78951	https://www.genecards.org/cgi-bin/carddisp.pl?gene=NECAB3
SLC1A5	Solute Carrier Family 1 Member 5	Protein Coding	51	GC19M070795	1.78778	https://www.genecards.org/cgi-bin/carddisp.pl?gene=SLC1A5
STAU1	Staufen Double-Stranded RNA Binding Protein 1	Protein Coding	44	GC20M049113	1.78693	https://www.genecards.org/cgi-bin/carddisp.pl?gene=STAU1
ITCH	Itchy E3 Ubiquitin Protein Ligase	Protein Coding	53	GC20P034363	1.78683	https://www.genecards.org/cgi-bin/carddisp.pl?gene=ITCH
FGFR4	Fibroblast Growth Factor Receptor 4	Protein Coding	59	GC05P177086	1.78497	https://www.genecards.org/cgi-bin/carddisp.pl?gene=FGFR4
SEMA3F	Semaphorin 3F	Protein Coding	50	GC03P050442	1.78451	https://www.genecards.org/cgi-bin/carddisp.pl?gene=SEMA3F
MRE11	MRE11 Homolog, Double Strand Break Repair Nuclease	Protein Coding	55	GC11M100293	1.78406	https://www.genecards.org/cgi-bin/carddisp.pl?gene=MRE11
ANKRD36B	Ankyrin Repeat Domain 36B	Protein Coding	35	GC02M098797	1.78345	https://www.genecards.org/cgi-bin/carddisp.pl?gene=ANKRD36B
MAP1S	Microtubule Associated Protein 1S	Protein Coding	42	GC19P072413	1.77882	https://www.genecards.org/cgi-bin/carddisp.pl?gene=MAP1S
TIGIT	T Cell Immunoreceptor With Ig And ITIM Domains	Protein Coding	47	GC03P114276	1.77723	https://www.genecards.org/cgi-bin/carddisp.pl?gene=TIGIT
ICMT	Isoprenylcysteine Carboxyl Methyltransferase	Protein Coding	47	GC01M007590	1.77674	https://www.genecards.org/cgi-bin/carddisp.pl?gene=ICMT
HOTTIP	HOXA Distal Transcript Antisense RNA	RNA Gene	25	GC07P027198	1.77547	https://www.genecards.org/cgi-bin/carddisp.pl?gene=HOTTIP
BTN3A2	Butyrophilin Subfamily 3 Member A2	Protein Coding	43	GC06P026365	1.77233	https://www.genecards.org/cgi-bin/carddisp.pl?gene=BTN3A2
ACOT12	Acyl-CoA Thioesterase 12	Protein Coding	44	GC05M081309	1.77164	https://www.genecards.org/cgi-bin/carddisp.pl?gene=ACOT12
STS	Steroid Sulfatase	Protein Coding	52	GC0XP007146	1.77018	https://www.genecards.org/cgi-bin/carddisp.pl?gene=STS
PMPCB	Peptidase, Mitochondrial Processing Subunit Beta	Protein Coding	50	GC07P103297	1.76978	https://www.genecards.org/cgi-bin/carddisp.pl?gene=PMPCB
MIR608	MicroRNA 608	RNA Gene	20	GC10P100974	1.76942	https://www.genecards.org/cgi-bin/carddisp.pl?gene=MIR608
SLC16A10	Solute Carrier Family 16 Member 10	Protein Coding	44	GC06P111087	1.76843	https://www.genecards.org/cgi-bin/carddisp.pl?gene=SLC16A10
EMILIN2	Elastin Microfibril Interfacer 2	Protein Coding	43	GC18P002846	1.76792	https://www.genecards.org/cgi-bin/carddisp.pl?gene=EMILIN2
FDPS	Farnesyl Diphosphate Synthase	Protein Coding	52	GC01P155308	1.7675	https://www.genecards.org/cgi-bin/carddisp.pl?gene=FDPS
PRRC2C	Proline Rich Coiled-Coil 2C	Protein Coding	40	GC01P171486	1.76371	https://www.genecards.org/cgi-bin/carddisp.pl?gene=PRRC2C
GLO1	Glyoxalase I	Protein Coding	52	GC06M071882	1.76304	https://www.genecards.org/cgi-bin/carddisp.pl?gene=GLO1
FGFR3	Fibroblast Growth Factor Receptor 3	Protein Coding	63	GC04P001795	1.76152	https://www.genecards.org/cgi-bin/carddisp.pl?gene=FGFR3
DNAJB8	DnaJ Heat Shock Protein Family (Hsp40) Member B8	Protein Coding	39	GC03M128462	1.7613	https://www.genecards.org/cgi-bin/carddisp.pl?gene=DNAJB8
FBXO3	F-Box Protein 3	Protein Coding	44	GC11M033740	1.76084	https://www.genecards.org/cgi-bin/carddisp.pl?gene=FBXO3
MAT2A	Methionine Adenosyltransferase 2A	Protein Coding	53	GC02P085900	1.7603	https://www.genecards.org/cgi-bin/carddisp.pl?gene=MAT2A
STRAP	Serine/Threonine Kinase Receptor Associated Protein	Protein Coding	44	GC12P015882	1.76017	https://www.genecards.org/cgi-bin/carddisp.pl?gene=STRAP
PLD4	Phospholipase D Family Member 4	Protein Coding	47	GC14P104924	1.75619	https://www.genecards.org/cgi-bin/carddisp.pl?gene=PLD4
MIR433	MicroRNA 433	RNA Gene	25	GC14P110566	1.75527	https://www.genecards.org/cgi-bin/carddisp.pl?gene=MIR433
PRDX6	Peroxiredoxin 6	Protein Coding	53	GC01P173477	1.75417	https://www.genecards.org/cgi-bin/carddisp.pl?gene=PRDX6
HOTAIR	HOX Transcript Antisense RNA	RNA Gene	27	GC12M053962	1.75401	https://www.genecards.org/cgi-bin/carddisp.pl?gene=HOTAIR
RBBP6	RB Binding Protein 6, Ubiquitin Ligase	Protein Coding	46	GC16P024537	1.75305	https://www.genecards.org/cgi-bin/carddisp.pl?gene=RBBP6
BMP1	Bone Morphogenetic Protein 1	Protein Coding	55	GC08P022164	1.753	https://www.genecards.org/cgi-bin/carddisp.pl?gene=BMP1
PDCD4	Programmed Cell Death 4	Protein Coding	50	GC10P110871	1.75279	https://www.genecards.org/cgi-bin/carddisp.pl?gene=PDCD4
GALNT1	Polypeptide N-Acetylgalactosaminyltransferase 1	Protein Coding	46	GC18P035581	1.75236	https://www.genecards.org/cgi-bin/carddisp.pl?gene=GALNT1
CD59	CD59 Molecule (CD59 Blood Group)	Protein Coding	53	GC11M033704	1.75203	https://www.genecards.org/cgi-bin/carddisp.pl?gene=CD59
BAP1	BRCA1 Associated Protein 1	Protein Coding	54	GC03M052401	1.74934	https://www.genecards.org/cgi-bin/carddisp.pl?gene=BAP1
PNPT1	Polyribonucleotide Nucleotidyltransferase 1	Protein Coding	50	GC02M055634	1.74855	https://www.genecards.org/cgi-bin/carddisp.pl?gene=PNPT1
PDCD10	Programmed Cell Death 10	Protein Coding	48	GC03M167683	1.74609	https://www.genecards.org/cgi-bin/carddisp.pl?gene=PDCD10
CAPRIN1	Cell Cycle Associated Protein 1	Protein Coding	44	GC11P034051	1.74417	https://www.genecards.org/cgi-bin/carddisp.pl?gene=CAPRIN1
CASP14	Caspase 14	Protein Coding	53	GC19P015049	1.74413	https://www.genecards.org/cgi-bin/carddisp.pl?gene=CASP14
CCNA2	Cyclin A2	Protein Coding	52	GC04M121816	1.74206	https://www.genecards.org/cgi-bin/carddisp.pl?gene=CCNA2
FOXF1	Forkhead Box F1	Protein Coding	47	GC16P086510	1.74197	https://www.genecards.org/cgi-bin/carddisp.pl?gene=FOXF1
FBXL18	F-Box And Leucine Rich Repeat Protein 18	Protein Coding	39	GC07M005431	1.74164	https://www.genecards.org/cgi-bin/carddisp.pl?gene=FBXL18
MIR3591	MicroRNA 3591	RNA Gene	15	GC18M058451	1.74123	https://www.genecards.org/cgi-bin/carddisp.pl?gene=MIR3591
TYMS	Thymidylate Synthetase	Protein Coding	56	GC18P000657	1.74068	https://www.genecards.org/cgi-bin/carddisp.pl?gene=TYMS
CDK19	Cyclin Dependent Kinase 19	Protein Coding	52	GC06M110609	1.73979	https://www.genecards.org/cgi-bin/carddisp.pl?gene=CDK19
PCK2	Phosphoenolpyruvate Carboxykinase 2, Mitochondrial	Protein Coding	53	GC14P024094	1.73943	https://www.genecards.org/cgi-bin/carddisp.pl?gene=PCK2
GALNT3	Polypeptide N-Acetylgalactosaminyltransferase 3	Protein Coding	52	GC02M165747	1.73725	https://www.genecards.org/cgi-bin/carddisp.pl?gene=GALNT3
IGFBP6	Insulin Like Growth Factor Binding Protein 6	Protein Coding	50	GC12P053097	1.73682	https://www.genecards.org/cgi-bin/carddisp.pl?gene=IGFBP6
AMOTL1	Angiomotin Like 1	Protein Coding	43	GC11P094686	1.73555	https://www.genecards.org/cgi-bin/carddisp.pl?gene=AMOTL1
DSP	Desmoplakin	Protein Coding	57	GC06P007541	1.73233	https://www.genecards.org/cgi-bin/carddisp.pl?gene=DSP
IL12RB2	Interleukin 12 Receptor Subunit Beta 2	Protein Coding	51	GC01P067307	1.73171	https://www.genecards.org/cgi-bin/carddisp.pl?gene=IL12RB2
CDK20	Cyclin Dependent Kinase 20	Protein Coding	49	GC09M087966	1.73111	https://www.genecards.org/cgi-bin/carddisp.pl?gene=CDK20
KDM2B	Lysine Demethylase 2B	Protein Coding	48	GC12M122478	1.73082	https://www.genecards.org/cgi-bin/carddisp.pl?gene=KDM2B
RUSF1	RUS Family Member 1	Protein Coding	36	GC16M038563	1.7306	https://www.genecards.org/cgi-bin/carddisp.pl?gene=RUSF1
PBX1	PBX Homeobox 1	Protein Coding	55	GC01P164524	1.72877	https://www.genecards.org/cgi-bin/carddisp.pl?gene=PBX1
RAET1E	Retinoic Acid Early Transcript 1E	Protein Coding	42	GC06M149883	1.72803	https://www.genecards.org/cgi-bin/carddisp.pl?gene=RAET1E
F7	Coagulation Factor VII	Protein Coding	55	GC13P113105	1.7279	https://www.genecards.org/cgi-bin/carddisp.pl?gene=F7
GOLPH3	Golgi Phosphoprotein 3	Protein Coding	45	GC05M032124	1.72589	https://www.genecards.org/cgi-bin/carddisp.pl?gene=GOLPH3
EGLN2	Egl-9 Family Hypoxia Inducible Factor 2	Protein Coding	52	GC19P072894	1.72531	https://www.genecards.org/cgi-bin/carddisp.pl?gene=EGLN2
S100A6	S100 Calcium Binding Protein A6	Protein Coding	48	GC01M153570	1.7246	https://www.genecards.org/cgi-bin/carddisp.pl?gene=S100A6
TRAF7	TNF Receptor Associated Factor 7	Protein Coding	48	GC16P013521	1.72456	https://www.genecards.org/cgi-bin/carddisp.pl?gene=TRAF7
KRT82	Keratin 82	Protein Coding	40	GC12M052393	1.72156	https://www.genecards.org/cgi-bin/carddisp.pl?gene=KRT82
ATIC	5-Aminoimidazole-4-Carboxamide Ribonucleotide Formyltransferase/IMP Cyclohydrolase	Protein Coding	52	GC02P215311	1.72152	https://www.genecards.org/cgi-bin/carddisp.pl?gene=ATIC
LINC00240	Long Intergenic Non-Protein Coding RNA 240	RNA Gene	20	GC06P026956	1.7209	https://www.genecards.org/cgi-bin/carddisp.pl?gene=LINC00240
PHF3	PHD Finger Protein 3	Protein Coding	43	GC06P063635	1.71997	https://www.genecards.org/cgi-bin/carddisp.pl?gene=PHF3
SCG5	Secretogranin V	Protein Coding	43	GC15P032641	1.71963	https://www.genecards.org/cgi-bin/carddisp.pl?gene=SCG5
VDAC1	Voltage Dependent Anion Channel 1	Protein Coding	53	GC05M133975	1.71675	https://www.genecards.org/cgi-bin/carddisp.pl?gene=VDAC1
[truncated: 905 more rows]

## Sheet: Table S2
Table S2 DE-lncRNAs in TCGA-LUAD cohort.
id	logFC	AveExpr	t	P.Value	adj.P.Val	B
AL606469.1	-2.94826	0.571807	-45.4892	1.47e-187	2.36e-183	417.562
AC095050.1	-1.59019	0.287967	-37.2442	8.5e-152	6.81e-148	335.958
LINC01996	-3.01278	0.728321	-36.4396	4.13e-148	2.21e-144	327.533
LINC02016	-2.49573	0.511955	-34.1331	2.37e-137	9.47e-134	302.939
AC128709.3	-1.9565	0.413006	-32.1159	1.01e-127	2.69e-124	280.913
LINC00656	-1.035	0.265778	-30.3406	4.3e-119	9.85e-116	261.161
LANCL1-AS1	-2.93281	1.15695	-29.8173	1.6e-116	3.2e-113	255.277
LINC00968	-2.38691	0.908214	-29.3756	2.41e-114	4.29e-111	250.291
AL445307.1	-1.5551	0.450175	-29.2824	6.96e-114	1.11e-110	249.237
AL590226.1	-2.36906	0.95823	-29.1941	1.9e-113	2.77e-110	248.238
AC084871.3	-2.31739	0.906372	-28.0859	6.06e-108	8.09e-105	235.636
AL354714.1	-1.49874	0.308545	-27.026	1.21e-102	1.5e-99	223.494
AC104237.2	-1.58529	0.411135	-26.9015	5.12e-102	5.86e-99	222.063
LINC00163	-1.09791	0.302011	-26.8713	7.26e-102	7.75e-99	221.716
AC104237.3	-1.89399	0.531822	-26.6373	1.09e-100	1.09e-97	219.022
FENDRR	-3.44187	1.62037	-26.3117	4.73e-99	4.46e-96	215.27
MIR3945HG	-1.69612	0.591452	-25.8039	1.72e-96	1.45e-93	209.405
HID1-AS1	-1.68435	0.801709	-25.2153	1.62e-93	1.24e-90	202.592
AC104984.4	-2.86577	0.880789	-24.4703	9.59e-90	6.68e-87	193.951
AC010776.2	-1.07162	0.236092	-24.2001	2.25e-88	1.5e-85	190.811
AC093110.1	-3.11003	2.21193	-23.9134	6.39e-87	3.94e-84	187.48
AC004554.1	-1.09611	0.420703	-23.8577	1.23e-86	7.27e-84	186.833
AC010776.3	-1.19598	0.247878	-23.786	2.83e-86	1.62e-83	186
LINC01863	-2.23924	0.82484	-23.7358	5.09e-86	2.81e-83	185.416
AC112206.2	-1.55697	0.572059	-23.4094	2.31e-84	1.23e-81	181.622
AC027288.3	-3.00277	1.46152	-22.7247	6.87e-81	3.55e-78	173.661
AC104211.1	-1.04425	0.401742	-22.4878	1.09e-79	5.16e-77	170.907
LINC02154	-2.7656	1.10766	-22.3983	3.11e-79	1.42e-76	169.867
AC004947.1	-1.18542	0.408561	-22.1178	8.23e-78	3.47e-75	166.609
AL355835.1	-1.00675	0.454445	-22.0738	1.37e-77	5.65e-75	166.098
AL109741.1	-1.94259	1.40715	-21.751	5.93e-76	2.38e-73	162.351
AL354714.3	-1.65545	0.49233	-21.5181	8.96e-75	3.5e-72	159.65
AC006273.1	-1.53987	0.744858	-21.3461	6.64e-74	2.42e-71	157.657
LINC02570	-1.26983	0.311345	-21.2791	1.45e-73	5.16e-71	156.881
MGC27382	-1.88547	0.675563	-21.1074	1.07e-72	3.72e-70	154.893
AL136369.1	-2.41017	0.708556	-21.0678	1.69e-72	5.65e-70	154.434
LINC01506	-1.38846	0.738345	-20.5846	4.63e-70	1.46e-67	148.85
AC026992.2	-1.30655	0.531058	-20.4804	1.55e-69	4.69e-67	147.647
AP001189.1	-1.87484	1.01967	-20.3473	7.25e-69	2.15e-66	146.112
AC116312.1	-1.2682	0.451844	-20.3387	8.02e-69	2.3e-66	146.013
PELATON	-2.46629	2.64148	-20.3385	8.04e-69	2.3e-66	146.01
SYN3-AS1	-1.19526	0.322284	-20.2727	1.72e-68	4.84e-66	145.252
AC026369.3	-3.0014	1.88454	-20.0321	2.78e-67	7.69e-65	142.483
PCAT19	-1.99186	1.78044	-19.9726	5.54e-67	1.5e-64	141.799
AC009806.1	-1.23427	0.656724	-19.9013	1.26e-66	3.37e-64	140.979
AL512603.2	-1.08523	0.480294	-19.8972	1.32e-66	3.47e-64	140.933
AC010998.1	-1.5469	0.562217	-19.8688	1.84e-66	4.67e-64	140.606
AC104984.1	-1.23398	0.274388	-19.8079	3.71e-66	9.28e-64	139.907
C2orf91	-1.18079	0.42028	-19.7128	1.11e-65	2.74e-63	138.815
AC092691.1	-1.14519	0.35525	-19.4735	1.75e-64	4.18e-62	136.073
AC009951.6	-1.14476	0.806097	-19.4214	3.18e-64	7.5e-62	135.476
AC010976.2	-1.98907	0.947716	-19.2755	1.7e-63	3.9e-61	133.808
AC108053.1	-1.17459	0.576815	-19.1826	4.94e-63	1.08e-60	132.747
PTPRN2-AS1	-1.6681	1.36693	-18.9141	1.07e-61	2.26e-59	129.685
AP001189.3	-1.98996	1.70962	-18.8153	3.32e-61	6.82e-59	128.561
AC069360.1	-1.16513	0.611706	-18.6285	2.8e-60	5.61e-58	126.439
AC021016.1	-1.40605	2.04961	-18.5777	5e-60	9.77e-58	125.863
AP000357.2	-3.47818	1.80288	-18.5524	6.67e-60	1.29e-57	125.576
AC019193.2	-1.07141	0.586671	-18.4258	2.82e-59	5.32e-57	124.141
AC090796.1	-1.10911	0.383165	-18.3985	3.85e-59	7.17e-57	123.832
LINC02104	-1.04243	0.541277	-18.2996	1.19e-58	2.16e-56	122.713
LINC01352	-1.23523	0.743752	-18.2811	1.46e-58	2.63e-56	122.505
LINC01290	-1.69908	1.26362	-18.0893	1.29e-57	2.29e-55	120.339
AC125807.2	-1.74261	1.79645	-18.0069	3.27e-57	5.76e-55	119.412
AL445423.1	-1.25834	0.752167	-17.8403	2.15e-56	3.71e-54	117.538
MGAT3-AS1	-1.22715	0.478903	-17.7684	4.85e-56	8.26e-54	116.731
AC026992.1	-1.15801	0.511618	-17.7598	5.34e-56	9.01e-54	116.634
AL035409.2	-1.75419	1.08604	-17.7525	5.8e-56	9.67e-54	116.553
AC245041.2	-2.63085	1.48455	-17.6239	2.47e-55	4e-53	115.111
LINC01936	-2.08136	1.73051	-17.5715	4.45e-55	7.06e-53	114.524
AC244153.1	-2.25982	1.28893	-17.4893	1.12e-54	1.76e-52	113.606
AC119424.1	-1.61179	0.527614	-17.2288	2.08e-53	3.17e-51	110.701
AC011899.2	-1.41508	1.05854	-17.1381	5.73e-53	8.66e-51	109.693
AP002856.2	-1.84784	0.468061	-17.0169	2.22e-52	3.26e-50	108.347
AC087521.1	-1.30903	0.740774	-16.935	5.52e-52	8.04e-50	107.44
AC096921.2	-1.45873	1.52997	-16.918	6.66e-52	9.62e-50	107.252
MYO16-AS1	-2.76449	1.26296	-16.8715	1.12e-51	1.6e-49	106.739
AF131215.7	-1.23183	0.655341	-16.8225	1.93e-51	2.73e-49	106.197
AC110611.2	-1.33025	1.54862	-16.8148	2.1e-51	2.92e-49	106.112
AC105914.2	-1.7973	0.545362	-16.8114	2.18e-51	3.01e-49	106.075
AC236972.3	-2.32679	1.22205	-16.5081	6.26e-50	8.35e-48	102.735
AC007877.1	-1.24126	1.17159	-16.5038	6.56e-50	8.69e-48	102.688
TBX2-AS1	-1.81117	1.89719	-16.3968	2.14e-49	2.78e-47	101.514
AC018529.1	-1.41186	0.702614	-16.3218	4.88e-49	6.25e-47	100.693
ADAMTS9-AS1	-1.22432	0.528948	-16.2723	8.4e-49	1.07e-46	100.152
AL008729.2	-2.28708	4.52317	-16.2533	1.04e-48	1.31e-46	99.9447
MBNL1-AS1	-1.31984	1.11763	-16.2382	1.22e-48	1.53e-46	99.7798
AC025271.4	-1.0276	0.545824	-16.0896	6.23e-48	7.74e-46	98.1594
AL121933.2	-2.26952	2.2513	-16.0214	1.31e-47	1.62e-45	97.4183
MIR22HG	-1.59012	4.36259	-15.6651	6.35e-46	7.43e-44	93.5619
AC116407.1	-2.04948	2.1495	-15.581	1.58e-45	1.82e-43	92.6569
AC100793.4	-1.25803	0.673401	-15.58	1.6e-45	1.83e-43	92.6457
AC000082.1	-1.23487	0.568078	-15.3081	2.99e-44	3.33e-42	89.7314
AC000050.2	-1.40568	0.908465	-15.2863	3.78e-44	4.18e-42	89.4992
PCAT6	2.07655	3.68032	15.248	5.71e-44	6.26e-42	89.0903
AC046195.1	-1.66694	0.738391	-15.1459	1.7e-43	1.84e-41	88.0029
AC091588.3	-1.07688	0.582924	-15.0723	3.74e-43	3.99e-41	87.2212
AC147067.2	-1.54416	1.31949	-15.0414	5.2e-43	5.52e-41	86.8934
AL357054.4	-1.27329	1.22712	-15.0269	6.08e-43	6.41e-41	86.7387
AC144831.1	-1.40105	1.474	-14.9734	1.07e-42	1.12e-40	86.1721
EP300-AS1	-1.73954	2.26112	-14.82	5.48e-42	5.6e-40	84.5522
LINC02014	1.83006	1.97482	14.7267	1.47e-41	1.49e-39	83.5703
AL512662.1	-1.15207	0.772604	-14.6547	3.15e-41	3.16e-39	82.8133
TBX5-AS1	-1.69438	2.31938	-14.5749	7.31e-41	7.28e-39	81.9776
MAGI2-AS3	-1.39532	1.77359	-14.5579	8.75e-41	8.66e-39	81.7991
AL162595.1	1.49449	2.66463	14.44	3.02e-40	2.93e-38	80.5686
AC245041.1	-2.44955	1.45114	-14.38	5.67e-40	5.4e-38	79.9434
NAGPA-AS1	-1.05702	0.676766	-14.3701	6.28e-40	5.96e-38	79.8405
AC007743.1	-1.33983	1.06227	-14.3025	1.27e-39	1.2e-37	79.1388
AC004816.1	1.91824	2.96342	14.2812	1.59e-39	1.48e-37	78.9178
AL137009.1	-1.36379	1.0762	-14.1825	4.45e-39	4.01e-37	77.8949
AC022509.2	-1.53828	0.840791	-14.1528	6.06e-39	5.4e-37	77.5881
LHFPL3-AS2	-3.06189	2.35529	-14.0766	1.34e-38	1.17e-36	76.8019
AC002066.1	-1.31699	0.949172	-13.8161	1.97e-37	1.65e-35	74.1303
LINC01914	-1.22219	1.01052	-13.7262	4.95e-37	4.05e-35	73.214
LINC02185	-1.54165	1.18587	-13.6004	1.79e-36	1.42e-34	71.9356
AC008268.1	-3.33411	2.12072	-13.5545	2.86e-36	2.23e-34	71.471
AC112722.1	-1.45839	1.09595	-13.5394	3.34e-36	2.57e-34	71.3186
AC013553.3	-1.09362	1.11695	-13.504	4.79e-36	3.67e-34	70.9602
AC068870.2	-1.23198	3.35295	-13.489	5.58e-36	4.26e-34	70.8089
LINC02471	-1.27835	0.60981	-13.4633	7.25e-36	5.5e-34	70.5494
FGF14-AS2	-1.56294	2.00967	-13.3991	1.39e-35	1.04e-33	69.9026
AC090559.1	-1.54758	2.66475	-13.3759	1.76e-35	1.3e-33	69.6696
LINC02555	-2.24131	1.35334	-13.3492	2.3e-35	1.68e-33	69.4019
AF131215.5	-1.59527	1.77201	-13.3355	2.64e-35	1.92e-33	69.2643
LINC00472	-1.16934	0.743183	-13.2349	7.29e-35	5.22e-33	68.2563
AC004921.1	-1.14564	1.45866	-13.234	7.36e-35	5.24e-33	68.2474
LINC00857	1.46981	2.42788	13.1541	1.64e-34	1.14e-32	67.4501
LINC01169	-1.11489	0.515655	-13.1053	2.68e-34	1.85e-32	66.9639
AC027277.2	-1.64003	1.14329	-13.0827	3.36e-34	2.31e-32	66.7392
LINC00511	1.39765	1.65711	13.0564	4.38e-34	2.98e-32	66.4775
AL133482.1	-1.21294	1.27115	-12.9992	7.74e-34	5.21e-32	65.9109
AL031985.3	1.17543	2.22024	12.9566	1.18e-33	7.87e-32	65.4897
AC079467.1	-2.45576	1.81387	-12.9309	1.53e-33	1.01e-31	65.2354
LRRK2-DT	-2.88351	2.7675	-12.8571	3.18e-33	2.07e-31	64.5075
AF131215.6	-1.39065	1.52469	-12.7777	6.99e-33	4.54e-31	63.7263
RAMP2-AS1	-1.15307	0.819313	-12.6308	2.97e-32	1.88e-30	62.2897
SENCR	-1.01591	1.23944	-12.5988	4.07e-32	2.54e-30	61.9771
AC130371.2	-1.38849	1.96825	-12.5309	7.92e-32	4.92e-30	61.3173
MNX1-AS1	2.01234	1.97226	12.4621	1.55e-31	9.56e-30	60.6504
AC018755.4	-1.57053	2.18141	-12.4232	2.27e-31	1.39e-29	60.274
GATA6-AS1	-1.28955	0.920068	-12.3514	4.55e-31	2.74e-29	59.5813
AC013457.1	-2.19506	1.04297	-12.2967	7.74e-31	4.58e-29	59.0549
SFTA1P	-2.87574	3.66233	-12.137	3.62e-30	2.06e-28	57.5255
AC015726.1	-1.13806	2.14759	-11.9596	1.98e-29	1.09e-27	55.8402
LINC01963	-1.16657	2.48248	-11.9314	2.59e-29	1.42e-27	55.5736
LINC01703	1.02125	1.33681	11.9051	3.32e-29	1.82e-27	55.3258
SNHG1	1.29192	4.526	11.8527	5.47e-29	2.96e-27	54.8322
AP000866.2	-1.33418	1.65981	-11.8352	6.45e-29	3.48e-27	54.6678
FAM83A-AS1	2.07334	1.93886	11.8192	7.51e-29	4.02e-27	54.5174
MRPL20-DT	1.16587	2.41776	11.7279	1.78e-28	9.38e-27	53.6611
AC067817.2	-1.23225	1.21164	-11.6676	3.14e-28	1.61e-26	53.0983
TDRKH-AS1	1.02681	1.5325	11.663	3.28e-28	1.68e-26	53.0558
AFAP1-AS1	2.99487	2.94044	11.6469	3.81e-28	1.95e-26	52.9059
BANCR	-1.87019	1.22925	-11.6175	5.02e-28	2.55e-26	52.6326
VPS9D1-AS1	1.63861	2.35668	11.575	7.48e-28	3.79e-26	52.2377
AC145343.1	1.31734	1.63434	11.4908	1.64e-27	8.22e-26	51.4586
AP001528.1	-1.05729	1.1605	-11.4514	2.37e-27	1.18e-25	51.0946
LINC01836	-1.53541	2.01151	-11.4067	3.59e-27	1.77e-25	50.683
AC092306.1	1.83717	2.74692	11.3577	5.65e-27	2.77e-25	50.2334
AC010998.3	-1.69556	0.880392	-11.3549	5.8e-27	2.83e-25	50.2075
FOXD2-AS1	1.14	2.55233	11.3516	5.98e-27	2.91e-25	50.1775
LINC01765	-1.82777	1.0704	-11.3241	7.71e-27	3.74e-25	49.9256
AL009177.1	-1.01627	0.703554	-11.3111	8.69e-27	4.19e-25	49.8066
AC105942.1	-1.19224	3.05662	-11.3018	9.46e-27	4.54e-25	49.7219
LINC01270	1.12446	1.38821	11.2944	1.01e-26	4.84e-25	49.6544
RHOXF1-AS1	-1.89058	1.78727	-11.273	1.23e-26	5.87e-25	49.4583
KLHDC7B-DT	1.4248	1.83585	11.2221	1.97e-26	9.32e-25	48.9945
AC080037.2	2.02122	1.99514	11.1568	3.59e-26	1.68e-24	48.4016
HHIP-AS1	-2.0286	2.14844	-11.1395	4.2e-26	1.96e-24	48.2445
LINC02289	-1.05501	0.814959	-11.1035	5.84e-26	2.7e-24	47.9186
Z98745.2	-1.14779	0.81699	-11.0619	8.53e-26	3.9e-24	47.5432
AL096828.3	1.13519	1.8152	10.9993	1.51e-25	6.78e-24	46.9792
AP001107.9	-1.21059	1.99886	-10.9876	1.68e-25	7.52e-24	46.874
LINC01977	1.30863	1.2857	10.9302	2.82e-25	1.25e-23	46.3594
AC009244.1	-1.88503	1.79009	-10.8548	5.56e-25	2.44e-23	45.6858
P3H2-AS1	-1.07058	0.691765	-10.8325	6.79e-25	2.96e-23	45.4872
AC119427.1	1.34157	3.17011	10.7709	1.18e-24	5.09e-23	44.9407
AC108134.3	-1.1031	1.54571	-10.6921	2.39e-24	1.01e-22	44.2427
AL022098.1	-1.16414	0.890234	-10.6608	3.15e-24	1.32e-22	43.9675
AC005041.3	1.01954	1.64463	10.6461	3.59e-24	1.5e-22	43.8381
AL161618.1	-1.25025	0.602659	-10.6394	3.81e-24	1.58e-22	43.7784
NINJ2-AS1	-1.07832	3.26503	-10.6195	4.55e-24	1.88e-22	43.6038
AC004832.1	-1.17166	0.691556	-10.6121	4.86e-24	2e-22	43.5387
LINC01426	1.32376	1.85991	10.597	5.55e-24	2.27e-22	43.4065
LINC02416	1.35659	1.36319	10.5832	6.28e-24	2.56e-22	43.2856
SLC12A9-AS1	1.21635	1.9495	10.5255	1.05e-23	4.18e-22	42.7802
LINC02772	-1.3883	0.968573	-10.519	1.11e-23	4.41e-22	42.7232
ZFPM2-AS1	1.77021	1.73478	10.4845	1.5e-23	5.95e-22	42.423
PVT1	1.13198	1.4416	10.4624	1.82e-23	7.17e-22	42.23
AP002954.1	-1.08051	1.41417	-10.4234	2.57e-23	1.01e-21	41.8912
SNHG4	1.27386	2.22495	10.3838	3.63e-23	1.42e-21	41.5478
ARHGEF2-AS1	-1.70452	1.37286	-10.378	3.82e-23	1.49e-21	41.4976
WASIR2	1.08838	1.16923	10.3591	4.5e-23	1.74e-21	41.3348
Z98257.1	2.47002	2.44029	10.3152	6.6e-23	2.54e-21	40.9558
AC026401.3	1.09124	4.35181	10.2808	8.91e-23	3.38e-21	40.6594
C8orf34-AS1	-1.80009	2.10561	-10.1618	2.5e-22	9.28e-21	39.6399
DCST1-AS1	1.0765	2.27693	10.1422	2.95e-22	1.09e-20	39.4733
AC105219.3	1.02313	1.30781	10.1298	3.29e-22	1.21e-20	39.3676
LINC01614	1.88538	2.46377	10.0885	4.69e-22	1.71e-20	39.0163
AL033519.4	-1.28642	1.10415	-10.0448	6.81e-22	2.46e-20	38.6461
SNHG3	1.23457	4.0186	9.97325	1.26e-21	4.47e-20	38.0418
LINC01513	-1.14885	0.707035	-9.96755	1.32e-21	4.68e-20	37.9938
AC025580.1	2.21735	2.904	9.95794	1.43e-21	5.07e-20	37.913
AC092115.3	1.09793	1.3254	9.93265	1.77e-21	6.24e-20	37.7004
ANKRD44-AS1	-1.86318	1.76035	-9.88277	2.71e-21	9.44e-20	37.2822
PCCA-DT	1.18521	2.94263	9.78928	5.95e-21	2.04e-19	36.5023
PICSAR	-1.4855	0.826038	-9.7855	6.15e-21	2.1e-19	36.4708
SRGAP3-AS2	-2.22115	1.56382	-9.77224	6.87e-21	2.34e-19	36.3607
MIR223HG	-1.08536	1.15771	-9.71701	1.09e-20	3.65e-19	35.9029
AP002008.4	-1.00975	0.49302	-9.71224	1.14e-20	3.79e-19	35.8635
LINC02345	-1.26021	1.54295	-9.65885	1.77e-20	5.85e-19	35.4229
TMEM105	1.08561	1.70739	9.6433	2.02e-20	6.6e-19	35.2948
AC010719.1	1.5089	1.9791	9.62924	2.27e-20	7.4e-19	35.1793
AC113189.3	1.66261	2.11867	9.50811	6.19e-20	1.97e-18	34.1882
SEMA3B-AS1	-1.18696	2.16641	-9.35743	2.13e-19	6.56e-18	32.9679
DGCR5	1.07975	1.23465	9.28604	3.8e-19	1.15e-17	32.3947
LCAL1	2.62767	2.46275	9.27228	4.25e-19	1.28e-17	32.2846
RBPMS-AS1	-1.28014	2.42628	-9.2545	4.9e-19	1.47e-17	32.1425
AC027288.1	-1.5529	1.30578	-9.17757	9.12e-19	2.7e-17	31.5298
FEZF1-AS1	1.99247	1.9198	9.16033	1.05e-18	3.08e-17	31.3931
AP003469.2	1.17133	1.54395	9.14424	1.19e-18	3.49e-17	31.2656
AL162511.1	-1.57397	1.81572	-9.09672	1.74e-18	5.07e-17	30.89
CRIM1-DT	-1.14211	3.09605	-9.05458	2.44e-18	7.03e-17	30.5582
AC009005.1	1.09445	1.8548	9.05306	2.47e-18	7.1e-17	30.5463
LINC01612	-1.15724	0.917814	-8.97931	4.43e-18	1.26e-16	29.9683
SCAT8	1.63599	1.91833	8.97132	4.72e-18	1.34e-16	29.9059
AC105052.5	-1.06565	0.917244	-8.95991	5.17e-18	1.46e-16	29.8169
MELTF-AS1	1.03524	1.89377	8.94735	5.71e-18	1.61e-16	29.719
AC007405.3	-1.18558	2.6959	-8.92621	6.75e-18	1.88e-16	29.5544
AC009065.5	1.48157	1.77275	8.9179	7.2e-18	2e-16	29.4898
AC012236.1	1.13631	2.53912	8.85887	1.15e-17	3.12e-16	29.0321
AC107959.3	1.06703	1.62792	8.81791	1.58e-17	4.26e-16	28.7158
AL391056.1	1.32383	1.37074	8.74528	2.78e-17	7.31e-16	28.1578
C2CD4D-AS1	1.41285	4.49431	8.67242	4.88e-17	1.25e-15	27.6014
AC113349.1	-1.16415	0.671646	-8.643	6.13e-17	1.56e-15	27.3777
AC009065.2	1.03687	1.38073	8.61626	7.52e-17	1.9e-15	27.175
AC020907.1	1.00409	0.937825	8.55294	1.22e-16	3.02e-15	26.6967
AL355312.3	1.3241	1.86971	8.51196	1.67e-16	4.1e-15	26.3886
AC022211.3	1.10243	2.10619	8.45305	2.61e-16	6.35e-15	25.9477
FOXD3-AS1	1.42521	1.29651	8.43605	2.97e-16	7.19e-15	25.8209
LINC02635	-1.07087	1.52828	-8.43481	3e-16	7.25e-15	25.8117
AL133335.2	1.00296	0.923349	8.42107	3.33e-16	7.96e-15	25.7093
LINC02544	1.22023	1.39705	8.34787	5.77e-16	1.36e-14	25.1664
PRRT3-AS1	1.00947	2.35344	8.33542	6.34e-16	1.48e-14	25.0744
AL445493.3	-1.13836	1.17036	-8.33028	6.59e-16	1.53e-14	25.0365
MNX1-AS2	1.24819	1.57159	8.32364	6.92e-16	1.61e-14	24.9874
LINC00261	-1.80722	2.6292	-8.1622	2.3e-15	5.14e-14	23.8055
AC106900.1	1.28963	1.27743	8.1369	2.77e-15	6.12e-14	23.622
LINC02489	-1.80652	2.56134	-8.13176	2.88e-15	6.33e-14	23.5847
BBOX1-AS1	1.60092	1.55753	8.1298	2.92e-15	6.41e-14	23.5705
AL365181.3	1.97581	2.40622	8.1245	3.03e-15	6.65e-14	23.5322
CLDN10-AS1	1.817	1.70717	8.11855	3.17e-15	6.91e-14	23.4891
AC093817.2	1.19101	1.3636	8.1087	3.41e-15	7.41e-14	23.4179
AL590666.2	1.58707	1.94335	8.09445	3.78e-15	8.18e-14	23.3149
AL121956.7	-1.3252	1.19156	-8.04952	5.26e-15	1.12e-13	22.9914
AC048341.2	1.15567	2.57511	8.0294	6.09e-15	1.28e-13	22.8469
ATP13A4-AS1	-1.65919	1.66324	-8.01499	6.76e-15	1.41e-13	22.7437
AC027228.2	1.00427	1.07341	7.94608	1.11e-14	2.27e-13	22.2518
AL355353.1	1.00662	3.0001	7.92071	1.34e-14	2.71e-13	22.0716
TRIM31-AS1	1.00605	1.38619	7.8902	1.67e-14	3.35e-13	21.8554
AP002498.1	1.44192	1.60579	7.86561	1.99e-14	3.98e-13	21.6817
AP005233.2	1.75774	1.67961	7.79938	3.19e-14	6.28e-13	21.216
AL031058.1	1.12272	2.21923	7.72077	5.58e-14	1.08e-12	20.6672
AL357093.2	-1.10704	0.907281	-7.70549	6.22e-14	1.2e-12	20.5611
AL109615.3	1.18655	1.758	7.69314	6.78e-14	1.3e-12	20.4754
AC008496.3	1.9358	1.82909	7.68601	7.13e-14	1.36e-12	20.426
AP003498.2	-1.34929	3.35839	-7.64043	9.83e-14	1.85e-12	20.111
LINC00665	1.22742	2.32561	7.61993	1.13e-13	2.13e-12	19.9699
FRGCA	1.09289	1.16938	7.58864	1.41e-13	2.61e-12	19.755
AC099509.1	1.37085	1.59399	7.58773	1.42e-13	2.62e-12	19.7487
AC090181.2	-1.10216	2.05682	-7.52977	2.13e-13	3.85e-12	19.3526
STK32A-AS1	1.22561	1.65764	7.39223	5.48e-13	9.64e-12	18.4225
AC079210.1	-1.09052	1.66145	-7.38815	5.64e-13	9.9e-12	18.3952
LINC02159	1.12422	1.19917	7.38586	5.72e-13	1e-11	18.3798
COLCA1	-1.34406	2.22125	-7.35435	7.1e-13	1.23e-11	18.1688
AL353693.1	1.05076	0.986189	7.34513	7.56e-13	1.3e-11	18.1072
LINC02560	1.54073	2.56613	7.28531	1.13e-12	1.93e-11	17.7092
AL035446.1	-1.01269	1.7313	-7.26514	1.3e-12	2.19e-11	17.5756
LINC02474	1.48243	1.5639	7.13055	3.2e-12	5.23e-11	16.6918
AL691482.3	1.22017	2.33992	7.08966	4.19e-12	6.77e-11	16.4261
AL390719.2	1.23912	2.81384	7.08017	4.47e-12	7.18e-11	16.3645
LINC02562	1.38965	2.6967	6.89755	1.47e-11	2.23e-10	15.1944
AC111149.2	1.2296	1.36445	6.83187	2.25e-11	3.33e-10	14.7798
AL365181.2	1.41494	1.44059	6.80834	2.62e-11	3.85e-10	14.6321
AC006042.1	1.04006	3.2642	6.78886	2.96e-11	4.33e-10	14.5101
LINC01983	1.06133	1.20129	6.71938	4.61e-11	6.63e-10	14.0775
LINC02038	-1.24704	1.95626	-6.70636	5.01e-11	7.14e-10	13.9969
PIK3CD-AS2	1.05493	3.02154	6.69448	5.4e-11	7.66e-10	13.9235
AC120498.4	1.14359	1.06611	6.69386	5.42e-11	7.68e-10	13.9196
AL138760.1	1.02484	0.965738	6.65006	7.14e-11	9.97e-10	13.6497
AC010789.1	1.49143	1.3835	6.61709	8.78e-11	1.21e-09	13.4475
AC092071.1	-1.45774	2.15248	-6.57624	1.13e-10	1.54e-09	13.1982
AL121790.2	-1.16022	1.31266	-6.56251	1.23e-10	1.66e-09	13.1147
CASC9	1.3551	1.33574	6.53392	1.47e-10	1.97e-09	12.9413
LUCAT1	1.07943	1.40024	6.52912	1.52e-10	2.03e-09	12.9123
SYNPR-AS1	1.13495	2.06239	6.51694	1.64e-10	2.17e-09	12.8387
AC127526.5	-1.05396	3.89943	-6.40301	3.3e-10	4.18e-09	12.1557
AL844908.1	1.24278	2.19725	6.30833	5.85e-10	7.18e-09	11.596
LINC02864	1.21117	1.11664	6.3038	6.01e-10	7.37e-09	11.5694
LINC02009	1.00072	1.42896	6.25646	7.98e-10	9.64e-09	11.2924
AL353150.1	-1.0446	2.54264	-5.96912	4.3e-09	4.7e-08	9.65022
AD000090.1	1.45581	3.41298	5.95617	4.64e-09	5.05e-08	9.57783
LINC00942	1.55121	1.6086	5.91869	5.75e-09	6.18e-08	9.36901
LINC01671	-1.06074	2.32312	-5.69457	2.03e-08	2.01e-07	8.14455
AC106045.1	1.1395	1.16973	5.65536	2.51e-08	2.47e-07	7.93464
SFTA3	-1.32319	5.00469	-5.64398	2.68e-08	2.61e-07	7.87397
AC025575.2	1.14848	1.21232	5.12025	4.24e-07	3.38e-06	5.20006
LINC01436	1.43626	3.02599	4.9814	8.49e-07	6.45e-06	4.53071
AL391427.1	1.06628	1.40465	4.88541	1.36e-06	9.97e-06	4.07775
AC136475.3	1.31152	4.24737	4.76104	2.47e-06	1.74e-05	3.50292
LINC02257	1.00006	2.28179	4.73943	2.74e-06	1.92e-05	3.40441
AL135999.3	-1.08638	3.04815	-4.34956	1.63e-05	9.97e-05	1.69885
AL359704.2	1.19926	1.15835	4.32638	1.8e-05	0.00011	1.60172
DSCAM-AS1	1.23396	1.22192	3.81329	0.000153	0.000756	-0.4231
LINC00676	1.17006	1.06069	3.56669	0.000393	0.001766	-1.31016

## Sheet: Table S3
Table S3 DE-miRNAs in TCGA-LUAD cohort.
id	logFC	AveExpr	t	P.Value	adj.P.Val	B
hsa-miR-21-5p	2.98523	18.1185	24.1913	2.59e-89	5.37e-86	192.803
hsa-miR-210-5p	5.33445	9.08265	19.8269	7.91e-67	8.21e-64	141.396
hsa-miR-942-5p	2.49672	11.4487	18.28	5.19e-59	3.59e-56	123.523
hsa-miR-181c-5p	2.71203	14.1048	18.2473	7.57e-59	3.92e-56	123.148
hsa-miR-96-5p	2.82893	4.33863	18.1236	3.14e-58	1.09e-55	121.734
hsa-miR-3182	3.10751	5.79715	18.1233	3.15e-58	1.09e-55	121.73
hsa-miR-1295a	-2.9128	3.53068	-16.3729	1.31e-49	3.88e-47	102.027
hsa-miR-1293	-2.84771	4.83284	-16.3561	1.58e-49	4.1e-47	101.842
hsa-miR-548l	2.03603	3.88181	16.2758	3.87e-49	8.91e-47	100.953
hsa-miR-183-5p	2.522	13.0228	15.9156	2.09e-47	4.34e-45	96.9903
hsa-miR-497-5p	-3.68973	6.76604	-15.4313	4.26e-45	8.03e-43	91.7159
hsa-miR-3181	2.81088	4.65587	15.3227	1.39e-44	2.4e-42	90.5427
hsa-miR-1288-5p	2.37521	8.92524	15.0794	1.94e-43	3.1e-41	87.9252
hsa-miR-7157-5p	-1.53057	0.528085	-14.56	5.09e-41	7.54e-39	82.399
hsa-miR-1262	2.39739	4.82382	13.9468	3.26e-38	4.51e-36	75.9884
hsa-miR-144-5p	2.94189	10.8045	13.9149	4.55e-38	5.9e-36	75.6588
hsa-miR-484	2.29652	8.68911	13.7391	2.83e-37	3.45e-35	73.8475
hsa-miR-31-5p	-2.49229	11.8062	-13.5863	1.37e-36	1.49e-34	72.2824
hsa-miR-524-3p	2.76469	8.06205	13.4907	3.66e-36	3.8e-34	71.3075
hsa-miR-142-5p	2.38906	9.49298	13.3659	1.31e-35	1.3e-33	70.0411
hsa-miR-708-5p	1.52592	2.09797	13.1509	1.17e-34	1.1e-32	67.8717
hsa-miR-29b-1-5p	2.14907	9.49522	13.0275	4.07e-34	3.67e-32	66.6365
hsa-miR-2682-3p	2.30232	2.8293	13.0164	4.55e-34	3.93e-32	66.5254
hsa-let-7a-5p	-1.46521	14.8494	-12.8667	2.05e-33	1.7e-31	65.0349
hsa-miR-190a-5p	-2.96043	1.99235	-12.8222	3.2e-33	2.55e-31	64.5934
hsa-miR-3119	1.43111	6.39737	12.7686	5.46e-33	4.19e-31	64.063
hsa-miR-92a-1-5p	2.55445	3.81717	12.657	1.66e-32	1.23e-30	62.9623
hsa-miR-642a-5p	1.79685	3.47087	12.5817	3.49e-32	2.5e-30	62.2236
hsa-miR-873-3p	2.88124	3.20951	12.4486	1.3e-31	8.98e-30	60.9225
hsa-miR-125a-5p	4.4166	9.27994	12.4269	1.61e-31	1.08e-29	60.7112
hsa-miR-345-5p	2.89477	5.33032	12.3858	2.41e-31	1.56e-29	60.3118
hsa-miR-296-5p	2.0395	3.1236	12.346	3.56e-31	2.23e-29	59.9248
hsa-miR-101-3p	2.46727	7.88126	12.26	8.23e-31	5.02e-29	59.0932
hsa-miR-1225-5p	1.70142	3.12712	12.1076	3.62e-30	2.15e-28	57.6263
hsa-miR-18b-5p	-1.44174	0.954493	-12.088	4.38e-30	2.52e-28	57.4382
hsa-miR-1251-5p	-1.15504	1.04597	-11.9064	2.52e-29	1.41e-27	55.7061
hsa-miR-938	1.40619	2.78794	11.8862	3.05e-29	1.67e-27	55.5145
hsa-miR-129-5p	1.84372	15.2169	11.7979	7.1e-29	3.78e-27	54.6788
hsa-miR-2116-5p	1.90357	3.71477	11.7251	1.42e-28	7.36e-27	53.993
hsa-miR-361-5p	1.75348	3.99733	11.717	1.53e-28	7.76e-27	53.9164
hsa-miR-1181	1.72127	4.44	11.6605	2.62e-28	1.29e-26	53.3858
hsa-miR-330-5p	-1.67331	8.08659	-11.5789	5.66e-28	2.73e-26	52.6229
hsa-miR-940	1.70005	2.35759	11.4821	1.41e-27	6.64e-26	51.7213
hsa-miR-145-5p	-1.95876	16.1345	-11.3539	4.67e-27	2.15e-25	50.5344
hsa-let-7c-5p	-1.75787	10.0861	-11.1796	2.35e-26	1.06e-24	48.9349
hsa-miR-146b-3p	1.69692	4.45683	11.1457	3.21e-26	1.39e-24	48.6258
hsa-miR-4682	3.02228	4.61956	10.7083	1.72e-24	7.27e-23	44.69
hsa-miR-412-5p	2.03683	6.514	10.6625	2.59e-24	1.07e-22	44.2841
hsa-miR-1284	-1.11738	9.74837	-10.6251	3.62e-24	1.47e-22	43.9526
hsa-miR-20a-5p	1.61735	7.49757	10.5995	4.55e-24	1.81e-22	43.7266
hsa-miR-17-5p	1.54127	8.16226	10.5622	6.34e-24	2.48e-22	43.398
hsa-miR-4669	1.6499	5.55967	10.498	1.12e-23	4.23e-22	42.8349
hsa-miR-93-5p	1.44438	11.6612	10.4618	1.55e-23	5.72e-22	42.5177
hsa-miR-432-3p	2.03396	2.12605	10.4558	1.63e-23	5.93e-22	42.4649
hsa-miR-376b-5p	1.75512	2.91629	10.4143	2.35e-23	8.41e-22	42.1026
hsa-miR-1252-5p	-2.53896	6.32882	-10.3993	2.68e-23	9.44e-22	41.9721
hsa-miR-877-5p	1.24924	2.78479	10.3075	6.01e-23	2.08e-21	41.1756
hsa-miR-513b-5p	2.30215	6.44774	10.2685	8.45e-23	2.87e-21	40.8385
hsa-miR-6816-5p	1.1663	3.05596	10.2054	1.47e-22	4.9e-21	40.2946
hsa-miR-6815-3p	-1.37398	1.73166	-10.1934	1.63e-22	5.36e-21	40.191
hsa-miR-3065-5p	1.72247	3.37497	10.1102	3.35e-22	1.08e-20	39.4789
hsa-miR-6801-5p	1.21745	1.36187	10.0758	4.51e-22	1.44e-20	39.185
hsa-miR-320b	1.73258	1.92675	10.0014	8.54e-22	2.68e-20	38.5528
hsa-miR-1292-5p	2.07915	5.28718	9.94945	1.33e-21	4.13e-20	38.1132
hsa-miR-20b-5p	1.88373	3.89674	9.94012	1.44e-21	4.4e-20	38.0345
hsa-miR-548j-5p	1.49218	2.4999	9.92264	1.68e-21	5.04e-20	37.887
hsa-miR-3159	1.20902	6.67075	9.86798	2.67e-21	7.8e-20	37.427
hsa-miR-875-5p	1.40492	7.2449	9.85928	2.88e-21	8.28e-20	37.354
hsa-miR-1249-5p	1.4069	10.7955	9.75092	7.2e-21	2.02e-19	36.4481
hsa-miR-198	1.40528	10.7992	9.74762	7.4e-21	2.05e-19	36.4206
hsa-miR-580-5p	1.77151	2.71125	9.69236	1.18e-20	3.22e-19	35.9615
hsa-miR-671-5p	1.22347	2.22105	9.68718	1.23e-20	3.31e-19	35.9186
hsa-miR-1909-5p	1.46955	4.79055	9.63817	1.86e-20	4.93e-19	35.513
hsa-miR-520c-3p	-2.29102	3.24006	-9.49642	6.04e-20	1.57e-18	34.3487
hsa-miR-1234-3p	1.35963	3.18435	9.45225	8.7e-20	2.2e-18	33.9884
hsa-miR-490-5p	-2.33798	8.63442	-9.43836	9.76e-20	2.44e-18	33.8753
hsa-miR-3145-5p	1.88726	6.87035	9.37364	1.66e-19	4.1e-18	33.3501
hsa-miR-19b-1-5p	1.70838	4.11316	9.31944	2.59e-19	6.32e-18	32.9124
hsa-miR-196b-5p	1.50862	4.45336	9.30494	2.91e-19	7.03e-18	32.7956
hsa-miR-10b-5p	1.22249	7.60697	9.29905	3.06e-19	7.29e-18	32.7482
hsa-miR-767-5p	1.55893	2.49117	9.24604	4.71e-19	1.11e-17	32.3225
hsa-miR-135a-5p	-1.86731	2.61353	-9.20387	6.63e-19	1.54e-17	31.9852
hsa-miR-433-5p	1.70417	6.03695	9.1925	7.27e-19	1.67e-17	31.8944
hsa-miR-152-5p	-2.02104	3.06126	-9.17922	8.09e-19	1.84e-17	31.7886
hsa-miR-3120-5p	1.07467	1.17823	9.11512	1.36e-18	3.06e-17	31.279
hsa-miR-592	1.27139	4.27968	9.08575	1.72e-18	3.83e-17	31.0463
hsa-miR-4661-5p	-1.12896	2.40584	-9.0558	2.18e-18	4.82e-17	30.8097
hsa-miR-146b-5p	1.85618	2.2728	9.03802	2.52e-18	5.49e-17	30.6696
hsa-miR-362-5p	1.11756	12.5142	9.0346	2.59e-18	5.59e-17	30.6426
hsa-miR-19b-2-5p	1.42441	6.47298	9.00335	3.32e-18	7.1e-17	30.3968
hsa-miR-197-5p	1.31696	9.30134	8.92563	6.15e-18	1.3e-16	29.7882
hsa-miR-1246	1.07463	1.17303	8.84018	1.21e-17	2.53e-16	29.1236
hsa-miR-3157-5p	1.20426	7.8463	8.58856	8.56e-17	1.74e-15	27.195
hsa-miR-3622b-5p	1.28179	3.60224	8.53135	1.33e-16	2.6e-15	26.7625
hsa-miR-943	1.19689	4.61845	8.50033	1.68e-16	3.26e-15	26.5288
hsa-miR-150-5p	1.80673	3.67503	8.47489	2.04e-16	3.93e-15	26.3377
hsa-miR-384	1.34326	5.15412	8.46049	2.28e-16	4.34e-15	26.2298
hsa-miR-519d-5p	1.77077	5.50063	8.43668	2.73e-16	5.16e-15	26.0516
hsa-miR-30d-5p	-1.45132	5.09541	-8.42567	2.97e-16	5.55e-15	25.9693
hsa-miR-3126-5p	-1.04191	5.8331	-8.30265	7.52e-16	1.39e-14	25.0557
hsa-miR-664a-5p	-1.04435	4.99771	-8.27654	9.15e-16	1.68e-14	24.8632
hsa-miR-199b-5p	1.37916	6.9108	8.24477	1.16e-15	2.11e-14	24.6295
hsa-miR-3124-5p	-1.64479	3.21964	-8.22672	1.33e-15	2.38e-14	24.4971
hsa-miR-618	2.01789	2.0228	8.22632	1.33e-15	2.38e-14	24.4942
hsa-miR-921	-1.0125	4.47342	-8.12697	2.78e-15	4.85e-14	23.7694
hsa-miR-3938	1.28493	9.57866	8.03802	5.35e-15	9.25e-14	23.1263
hsa-miR-1178-5p	1.11842	4.30182	7.97044	8.76e-15	1.48e-13	22.6415
hsa-miR-30a-5p	-1.44791	13.6237	-7.92211	1.24e-14	2.07e-13	22.2968
hsa-miR-9-5p	1.00125	8.68577	7.82957	2.43e-14	3.96e-13	21.6415
hsa-miR-1260b	1.40816	3.70632	7.80199	2.96e-14	4.79e-13	21.4474
hsa-miR-1307-5p	-1.18013	3.40311	-7.76128	3.95e-14	6.31e-13	21.1619
hsa-miR-659-5p	1.18775	1.47165	7.71119	5.64e-14	8.93e-13	20.8122
hsa-miR-7157-3p	1.01967	1.6763	7.70955	5.71e-14	8.97e-13	20.8008
hsa-miR-15b-5p	-1.68452	3.24808	-7.68692	6.7e-14	1.04e-12	20.6435
hsa-miR-1260a	1.25065	4.08196	7.65404	8.45e-14	1.3e-12	20.4156
hsa-let-7e-5p	-1.00711	10.2628	-7.64141	9.24e-14	1.41e-12	20.3282
hsa-miR-889-5p	1.25468	7.66109	7.5178	2.19e-13	3.25e-12	19.4796
hsa-miR-4435	1.59036	3.07389	7.50773	2.35e-13	3.46e-12	19.4109
hsa-miR-3183	1.21601	1.21429	7.44335	3.67e-13	5.29e-12	18.9739
hsa-miR-1-5p	-1.17111	5.09271	-7.42236	4.25e-13	5.99e-12	18.8321
hsa-miR-4503	1.05606	1.31628	7.38209	5.6e-13	7.84e-12	18.561
hsa-miR-107	3.19667	3.88866	7.25475	1.33e-12	1.82e-11	17.7115
hsa-miR-643	1.03492	1.46427	7.16299	2.47e-12	3.26e-11	17.107
hsa-let-7f-5p	-1.19814	13.0982	-7.15626	2.58e-12	3.39e-11	17.063
hsa-miR-3141	1.05435	2.65461	7.10801	3.56e-12	4.59e-11	16.7478
hsa-miR-629-5p	-1.3423	4.67683	-7.09007	4.01e-12	5.11e-11	16.6312
hsa-let-7g-5p	1.19834	9.13637	7.06346	4.79e-12	6.05e-11	16.4586
hsa-miR-548k	1.117	5.74639	6.99996	7.27e-12	8.98e-11	16.0489
hsa-miR-1256	-1.17858	2.10865	-6.96549	9.12e-12	1.12e-10	15.8278
hsa-miR-200b-5p	1.73271	4.87132	6.89264	1.47e-11	1.75e-10	15.3635
hsa-miR-3158-5p	1.32168	3.64887	6.87442	1.65e-11	1.95e-10	15.248
hsa-miR-32-5p	2.08128	2.23432	6.8384	2.08e-11	2.43e-10	15.0205
hsa-miR-424-5p	1.20661	4.88285	6.7831	2.97e-11	3.44e-10	14.6732
hsa-miR-1250-5p	1.07714	4.09623	6.72045	4.43e-11	5.07e-10	14.2826
hsa-miR-596	1.35827	1.74116	6.60873	8.97e-11	1.02e-09	13.5937
hsa-miR-4722-5p	1.01149	2.14496	6.52049	1.55e-10	1.75e-09	13.0565
hsa-miR-103a-3p	1.31838	3.37773	6.42864	2.74e-10	3e-09	12.5041
hsa-miR-1538	-1.02154	1.8386	-6.41829	2.92e-10	3.18e-09	12.4423
hsa-miR-218-5p	1.36829	4.13938	6.33458	4.86e-10	5.14e-09	11.9454
hsa-miR-143-5p	1.13812	6.40981	6.11629	1.79e-09	1.79e-08	10.6763
hsa-miR-19a-5p	1.02473	3.36945	6.04253	2.75e-09	2.72e-08	10.2563
hsa-miR-3137	-1.14646	0.905016	-6.02648	3.02e-09	2.96e-08	10.1654
hsa-miR-449a	2.13369	4.68704	6.01499	3.23e-09	3.15e-08	10.1006
hsa-miR-1226-5p	1.58367	1.77708	6.00776	3.37e-09	3.26e-08	10.0598
hsa-miR-126-5p	1.41864	1.59461	5.88596	6.78e-09	6.37e-08	9.37955
hsa-miR-3689a-5p	-1.21912	2.14189	-5.839	8.86e-09	8.27e-08	9.12057
hsa-miR-4302	1.13002	2.21523	5.68789	2.06e-08	1.87e-07	8.29966
hsa-miR-106a-5p	1.70893	8.97801	5.54992	4.4e-08	3.77e-07	7.56693
hsa-miR-2113	1.28199	3.59467	5.54443	4.53e-08	3.87e-07	7.53812
hsa-miR-3920	2.76764	3.19203	5.46154	7.08e-08	5.94e-07	7.10607
hsa-miR-876-5p	1.05898	2.58822	5.30659	1.61e-07	1.29e-06	6.31415
hsa-miR-1587	1.1951	1.60837	5.09782	4.69e-07	3.56e-06	5.2798
hsa-miR-187-5p	1.52152	3.7385	5.00397	7.51e-07	5.5e-06	4.82716
hsa-miR-6867-5p	1.24712	4.97517	4.66375	3.88e-06	2.62e-05	3.2511
hsa-miR-200c-5p	1.29777	7.82051	4.45464	1.01e-05	6.27e-05	2.33342
hsa-miR-381-5p	1.2038	13.9021	4.31354	1.9e-05	0.000111	1.73636
hsa-miR-205-5p	1.90282	6.3532	4.30089	2e-05	0.000117	1.68368
hsa-miR-103a-2-5p	1.76153	1.92774	3.94929	8.83e-05	0.000451	0.278581
hsa-miR-3165	1.02902	1.95938	3.94653	8.93e-05	0.000455	0.268004
hsa-miR-2110	-1.07063	3.81869	-3.53668	0.000438	0.00196	-1.2254
hsa-miR-3944-5p	1.1472	2.81864	3.44286	0.000618	0.002665	-1.54529
hsa-miR-190b	1.29653	1.50475	3.36938	0.000805	0.003378	-1.79006

## Sheet: Table S4
Table S4 DEGs in TCGA-LUAD cohort.
id	logFC	AveExpr	t	P.Value	adj.P.Val	B
SERTM1	-3.73494	0.792133	-35.7999	3.43e-145	6.64e-141	321.085
RS1	-1.93339	0.42369	-35.7203	8.04e-145	7.77e-141	320.24
ANGPT4	-2.15298	0.560688	-34.9397	3.52e-141	2.26e-137	311.901
SH3GL3	-2.39243	0.562197	-34.7888	1.79e-140	8.66e-137	310.28
SLC6A4	-5.18432	1.22881	-33.6621	3.73e-135	1.44e-131	298.096
GPM6A	-4.00346	1.2341	-33.6205	5.88e-135	1.89e-131	297.644
CD300LG	-3.10675	0.701364	-32.3314	8.6e-129	2.37e-125	283.518
CD5L	-1.87387	0.466817	-31.7955	3.32e-126	8.02e-123	277.591
SGCG	-2.8394	1.00683	-31.7512	5.44e-126	1.17e-122	277.099
C10orf67	-1.77851	0.449106	-31.343	5.19e-124	1e-120	272.562
ITLN2	-4.80149	1.34823	-30.7636	3.45e-121	6.06e-118	266.092
WNT3A	-3.32332	1.07769	-30.3372	4.21e-119	6.78e-116	261.309
GYPE	-2.234	0.912653	-29.7271	4.2e-116	6.24e-113	254.435
SCUBE1	-2.76731	1.08635	-28.8362	1.07e-111	1.47e-108	244.335
SPAAR	-1.86848	1.17147	-28.6585	8.14e-111	1.05e-107	242.312
CHRM1	-1.90554	0.402619	-28.3918	1.72e-109	2.08e-106	239.272
OVCH1	-1.65255	0.439818	-28.0725	6.72e-108	7.64e-105	235.624
STX11	-3.04953	2.91094	-28.0252	1.16e-107	1.24e-104	235.083
RTKN2	-4.11411	2.76811	-27.7358	3.23e-106	3.28e-103	231.769
MYZAP	-2.78498	1.60814	-27.6544	8.23e-106	7.96e-103	230.836
FREM3	-1.14022	0.223135	-27.6172	1.27e-105	1.16e-102	230.408
MYOC	-2.36386	0.542506	-27.5497	2.75e-105	2.42e-102	229.634
GRIA1	-2.73328	0.881641	-27.36	2.45e-104	2.06e-101	227.456
RXFP1	-2.03742	0.894126	-27.142	3.04e-103	2.45e-100	224.949
ST8SIA6	-2.83349	1.26564	-27.0842	5.92e-103	4.58e-100	224.284
NECAB1	-2.57175	1.21596	-26.9619	2.43e-102	1.81e-99	222.877
JPH4	-1.63446	0.86121	-26.699	5.1e-101	3.65e-98	219.847
FAM107A	-4.56313	2.88735	-26.6528	8.71e-101	6.01e-98	219.314
CNTN6	-2.81019	0.995837	-26.525	3.83e-100	2.55e-97	217.839
PTPRQ	-1.44075	0.325028	-26.4961	5.35e-100	3.45e-97	217.506
FABP4	-5.65844	3.20831	-26.4362	1.07e-99	6.67e-97	216.815
LGI3	-4.81745	1.71678	-26.3335	3.52e-99	2.13e-96	215.629
STXBP6	-3.02958	1.42727	-26.186	1.95e-98	1.14e-95	213.925
RSPO1	-2.37164	0.892187	-26.0214	1.32e-97	7.5e-95	212.02
CA4	-4.36543	1.83091	-25.9522	2.95e-97	1.63e-94	211.22
C20orf202	-1.41187	0.768452	-25.9236	4.11e-97	2.21e-94	210.888
KCNA4	-1.6636	0.360776	-25.4552	9.54e-95	4.98e-92	205.463
OTC	-1.26657	0.320919	-25.3595	2.91e-94	1.48e-91	204.353
TEK	-3.26334	3.11865	-25.3108	5.12e-94	2.54e-91	203.788
HBA1	-2.50025	0.760852	-25.2247	1.4e-93	6.75e-91	202.789
NCKAP5	-3.27801	1.52176	-25.1453	3.53e-93	1.66e-90	201.867
TAL1	-2.16319	1.42251	-25.0891	6.78e-93	3.12e-90	201.215
KANK3	-2.58034	2.21498	-25.0702	8.45e-93	3.8e-90	200.996
ODAM	-2.36379	0.781145	-24.9768	2.51e-92	1.1e-89	199.912
OTUD1	-2.06901	4.51197	-24.7977	2.03e-91	8.71e-89	197.831
CCM2L	-2.09683	1.6681	-24.7866	2.31e-91	9.7e-89	197.702
EDNRB	-3.62429	3.34354	-24.5642	3.09e-90	1.27e-87	195.117
RGCC	-3.02803	7.18248	-24.492	7.18e-90	2.89e-87	194.278
CLEC3B	-4.19071	3.69163	-24.4473	1.21e-89	4.77e-87	193.757
CTXND1	-2.12242	0.719269	-24.3356	4.46e-89	1.72e-86	192.458
PECAM1	-2.42593	6.3879	-24.3269	4.93e-89	1.87e-86	192.358
LIMS2	-2.7127	2.93599	-24.2956	7.12e-89	2.64e-86	191.993
RAMP2	-2.93288	5.25512	-24.2067	2.01e-88	7.33e-86	190.959
S1PR1	-2.87477	4.03422	-24.2033	2.09e-88	7.48e-86	190.92
ACVRL1	-2.58339	4.55823	-24.1657	3.24e-88	1.14e-85	190.482
ANGPTL7	-2.0447	0.538767	-24.1383	4.47e-88	1.54e-85	190.164
ECSCR	-1.84135	1.78331	-24.0665	1.03e-87	3.5e-85	189.328
GPD1	-3.94889	2.22304	-24.0174	1.83e-87	6.11e-85	188.757
ASPA	-1.6592	0.810119	-23.9978	2.3e-87	7.55e-85	188.529
PYCR1	3.33898	5.96861	23.9484	4.1e-87	1.32e-84	187.954
HSPA12B	-2.60727	2.93348	-23.9185	5.82e-87	1.85e-84	187.605
HTR3C	-1.92744	0.405671	-23.8481	1.32e-86	4.13e-84	186.787
JAM2	-2.45199	2.8301	-23.791	2.58e-86	7.92e-84	186.121
CCDC85A	-1.75319	0.860878	-23.6343	1.61e-85	4.87e-83	184.298
CCDC141	-1.46974	0.486714	-23.5722	3.33e-85	9.9e-83	183.575
FGF10	-1.67052	0.553291	-23.4809	9.68e-85	2.83e-82	182.512
LDB2	-2.56258	3.30852	-23.4382	1.6e-84	4.6e-82	182.014
GPIHBP1	-3.93385	2.52192	-23.3633	3.83e-84	1.09e-81	181.142
AGER	-6.52925	5.94456	-23.3497	4.48e-84	1.26e-81	180.985
ROBO4	-2.76647	3.30461	-23.2557	1.35e-83	3.71e-81	179.89
ARHGAP6	-1.90002	1.46089	-23.2214	2.01e-83	5.47e-81	179.49
FO681492.1	-1.67895	0.703574	-23.1587	4.18e-83	1.12e-80	178.761
CLEC1A	-2.01521	2.06612	-23.1185	6.69e-83	1.77e-80	178.292
PRX	-3.12191	2.77821	-23.1048	7.85e-83	2.05e-80	178.133
NOVA2	-1.80159	1.40027	-23.1015	8.16e-83	2.1e-80	178.095
SEMA3G	-2.82065	2.7915	-23.098	8.5e-83	2.16e-80	178.054
ALKAL2	-2.49093	1.20944	-23.0291	1.9e-82	4.77e-80	177.252
RAMP3	-3.16375	4.97563	-23.007	2.46e-82	6.1e-80	176.994
UPK3B	-5.14262	3.0118	-22.9809	3.34e-82	8.18e-80	176.69
ADRA1A	-1.22257	0.311769	-22.9549	4.53e-82	1.09e-79	176.388
ANKRD1	-4.73002	2.30084	-22.9484	4.89e-82	1.17e-79	176.312
FHL1	-3.8654	4.15295	-22.8114	2.42e-81	5.71e-79	174.717
EPAS1	-2.74297	7.5034	-22.7937	2.98e-81	6.93e-79	174.512
USHBP1	-1.68827	1.35666	-22.775	3.71e-81	8.53e-79	174.294
FGFBP2	-2.71987	1.25038	-22.5714	4e-80	8.99e-78	171.924
SPOCK2	-3.51184	5.21507	-22.5418	5.65e-80	1.26e-77	171.579
LIN7A	-2.37145	1.51508	-22.4978	9.45e-80	2.08e-77	171.067
COLEC10	-1.54212	0.606528	-22.4368	1.93e-79	4.19e-77	170.357
EMP2	-2.93181	6.31347	-22.4272	2.16e-79	4.58e-77	170.246
NMUR1	-1.89344	1.16768	-22.4144	2.51e-79	5.26e-77	170.096
TMEM100	-4.55442	2.96491	-22.4085	2.68e-79	5.58e-77	170.028
SIRPB1	-2.37788	1.69105	-22.4053	2.79e-79	5.73e-77	169.99
ADAMTS8	-3.64716	2.13063	-22.3113	8.35e-79	1.66e-76	168.897
CAV1	-4.09814	6.58715	-22.2822	1.17e-78	2.29e-76	168.559
TCF21	-3.05784	1.93097	-22.2107	2.7e-78	5.22e-76	167.727
BTNL9	-3.32594	2.11082	-22.1715	4.27e-78	8.18e-76	167.27
FOXF1	-2.65464	3.14359	-22.1562	5.11e-78	9.68e-76	167.093
ACADL	-3.0278	1.65308	-22.1445	5.85e-78	1.1e-75	166.957
GRIK4	-1.059	0.487743	-22.0275	2.3e-77	4.19e-75	165.596
GCOM1	-1.62952	0.863059	-22.0035	3.04e-77	5.48e-75	165.317
GSTM5	-1.9468	1.44189	-21.9601	5.04e-77	9.01e-75	164.813
LYVE1	-3.20996	2.8602	-21.8689	1.46e-76	2.59e-74	163.753
CLIC5	-4.20165	3.2874	-21.8673	1.49e-76	2.61e-74	163.734
CD101	-2.24174	2.03336	-21.8551	1.72e-76	2.99e-74	163.592
SH2D3C	-2.25381	3.82506	-21.8307	2.28e-76	3.93e-74	163.309
MGAT3	-3.31808	2.33687	-21.8102	2.9e-76	4.95e-74	163.071
SLC19A3	-2.49155	1.4056	-21.8044	3.1e-76	5.26e-74	163.003
PTPN21	-2.37413	3.18067	-21.7707	4.59e-76	7.72e-74	162.611
FCN3	-4.57277	3.66252	-21.7483	5.96e-76	9.94e-74	162.351
ADCY8	-1.66721	0.371744	-21.7307	7.32e-76	1.21e-73	162.147
ACTN2	-1.43206	0.570954	-21.6966	1.09e-75	1.78e-73	161.751
PALM2AKAP2	-2.56586	4.15688	-21.6636	1.6e-75	2.6e-73	161.367
GRK5	-2.56172	3.48335	-21.6248	2.52e-75	4.05e-73	160.917
MCEMP1	-4.58551	3.16732	-21.6158	2.8e-75	4.47e-73	160.812
MASP1	-1.66132	0.816994	-21.5921	3.69e-75	5.84e-73	160.537
CDH5	-2.62201	4.71197	-21.5704	4.74e-75	7.45e-73	160.286
TNR	-1.24152	0.307663	-21.4995	1.08e-74	1.69e-72	159.463
PDLIM2	-1.8493	2.4914	-21.4932	1.17e-74	1.8e-72	159.389
OVCH2	-1.64066	0.572155	-21.4623	1.67e-74	2.56e-72	159.031
PLAC9	-2.66177	3.54215	-21.4486	1.96e-74	2.99e-72	158.871
SOX7	-2.61395	2.32123	-21.3287	7.93e-74	1.2e-71	157.48
CALCRL	-2.80299	3.99159	-21.3191	8.87e-74	1.33e-71	157.369
ARHGEF15	-2.31867	2.84905	-21.3086	1e-73	1.49e-71	157.247
NXPH3	-1.88033	1.37107	-21.2754	1.48e-73	2.18e-71	156.862
ADRB2	-3.27145	3.23207	-21.2522	1.93e-73	2.81e-71	156.593
HIGD1B	-2.68736	2.93369	-21.2164	2.93e-73	4.23e-71	156.178
PRKG2	-2.11672	1.33278	-21.1776	4.6e-73	6.59e-71	155.728
ADGRE3	-1.95288	1.04909	-21.1703	5.01e-73	7.12e-71	155.643
FRMD3	-2.0612	1.56542	-21.1413	7.02e-73	9.91e-71	155.307
FEZ1	-1.81072	1.86989	-21.0667	1.67e-72	2.33e-70	154.443
FHL5	-2.66795	2.1139	-21.0461	2.13e-72	2.93e-70	154.205
MYCT1	-2.23368	3.30584	-21.0387	2.32e-72	3.18e-70	154.118
FMO2	-3.53483	3.91534	-21.0147	3.06e-72	4.17e-70	153.84
CYYR1	-2.2538	3.76424	-20.9393	7.36e-72	9.95e-70	152.967
FGD5	-2.22674	3.20342	-20.8716	1.62e-71	2.17e-69	152.184
EMCN	-2.79372	3.12166	-20.8479	2.13e-71	2.84e-69	151.909
IQSEC3	-1.59402	0.858362	-20.8301	2.62e-71	3.47e-69	151.703
CMTM2	-1.42639	1.02091	-20.8224	2.86e-71	3.76e-69	151.614
CAVIN2	-3.70541	5.1604	-20.8166	3.06e-71	3.98e-69	151.546
FAM110D	-1.80936	1.5842	-20.8108	3.28e-71	4.22e-69	151.48
GDF10	-3.41506	2.03653	-20.8049	3.51e-71	4.49e-69	151.412
GIMAP8	-2.52319	3.80079	-20.7894	4.2e-71	5.34e-69	151.232
WWC2	-2.35995	3.53228	-20.7401	7.45e-71	9.41e-69	150.662
RASIP1	-2.3183	3.26942	-20.7209	9.32e-71	1.17e-68	150.439
ABCA8	-2.78277	1.76905	-20.7062	1.1e-70	1.38e-68	150.269
DCC	-1.13231	0.488938	-20.5791	4.83e-70	5.94e-68	148.8
C14orf132	-2.75345	2.8653	-20.5738	5.13e-70	6.28e-68	148.739
SOX17	-2.29249	2.0886	-20.5676	5.52e-70	6.7e-68	148.668
KCNT2	-1.8391	0.90214	-20.5404	7.56e-70	9.14e-68	148.353
THSD1	-1.99021	2.31841	-20.5235	9.2e-70	1.1e-67	148.158
CD36	-3.35111	2.91985	-20.4625	1.87e-69	2.23e-67	147.453
STARD13	-1.93384	2.73079	-20.4343	2.59e-69	3.07e-67	147.127
TNNC1	-4.11672	4.0488	-20.4262	2.84e-69	3.35e-67	147.034
EFCC1	-2.49827	2.51197	-20.3934	4.16e-69	4.87e-67	146.655
LRRC36	-3.07141	1.72157	-20.3718	5.34e-69	6.22e-67	146.406
VEGFD	-4.1558	2.57736	-20.3533	6.62e-69	7.66e-67	146.193
ARHGEF26	-2.7498	3.41136	-20.3289	8.78e-69	1.01e-66	145.911
SIGLEC11	-1.42291	0.818701	-20.2984	1.25e-68	1.43e-66	145.559
RBP2	-2.68588	1.15606	-20.2789	1.57e-68	1.78e-66	145.334
SCN4B	-2.67657	2.14622	-20.2599	1.95e-68	2.21e-66	145.115
ARC	-2.41641	1.21753	-20.2421	2.4e-68	2.7e-66	144.91
LRRC2	-1.35707	0.732831	-20.2119	3.4e-68	3.8e-66	144.561
GPR146	-1.25152	0.943765	-20.1994	3.93e-68	4.37e-66	144.417
FPR2	-2.61139	1.73952	-20.1934	4.22e-68	4.66e-66	144.348
LRRN3	-2.49166	1.45492	-20.1161	1.03e-67	1.13e-65	143.458
CLEC14A	-2.37737	5.25378	-20.0842	1.49e-67	1.62e-65	143.09
GP9	-1.10907	0.359912	-20.0708	1.74e-67	1.88e-65	142.935
PTPRB	-2.55697	3.03206	-20.0553	2.08e-67	2.24e-65	142.757
TGM1	-1.94039	1.52574	-20.0465	2.31e-67	2.46e-65	142.655
CDO1	-2.57117	1.99746	-20.0367	2.58e-67	2.74e-65	142.542
STARD8	-2.07272	2.96035	-20.0286	2.84e-67	3e-65	142.449
SLC39A8	-2.82009	5.87723	-19.9815	4.89e-67	5.13e-65	141.908
SEMA6A	-2.22387	1.81351	-19.9502	7.02e-67	7.29e-65	141.548
INMT	-4.07141	4.27968	-19.9421	7.71e-67	7.97e-65	141.454
TENT5B	-2.95494	3.05973	-19.8991	1.27e-66	1.3e-64	140.959
FAM189A2	-2.86954	2.43414	-19.8917	1.38e-66	1.41e-64	140.874
ALAS2	-1.59291	0.477713	-19.8872	1.45e-66	1.48e-64	140.822
KL	-2.35516	1.57987	-19.8494	2.25e-66	2.27e-64	140.388
SOSTDC1	-3.84988	1.7344	-19.8221	3.08e-66	3.1e-64	140.074
AGRP	-2.83224	1.80038	-19.7909	4.42e-66	4.42e-64	139.715
NLRC4	-1.92307	2.28247	-19.777	5.19e-66	5.17e-64	139.555
TGFBR3	-2.66209	2.76015	-19.7677	5.78e-66	5.73e-64	139.448
GPA33	-2.87367	1.46772	-19.7659	5.9e-66	5.82e-64	139.427
HBA2	-4.58985	4.33229	-19.7582	6.44e-66	6.32e-64	139.339
KIF17	-1.52573	1.36735	-19.7465	7.37e-66	7.16e-64	139.205
IGSF10	-2.49468	1.40994	-19.7033	1.21e-65	1.17e-63	138.708
CLEC4M	-1.06772	0.225442	-19.6816	1.56e-65	1.5e-63	138.459
ERG	-2.06668	3.04226	-19.6727	1.73e-65	1.65e-63	138.357
F11	-2.35272	0.934387	-19.6051	3.76e-65	3.56e-63	137.582
TUBB1	-1.32051	0.646606	-19.5837	4.82e-65	4.54e-63	137.336
ACKR4	-2.05212	1.27781	-19.5689	5.71e-65	5.36e-63	137.165
PTCRA	-1.7912	1.23888	-19.5589	6.41e-65	5.99e-63	137.05
LMO2	-1.92528	3.84557	-19.5545	6.74e-65	6.27e-63	137
DNASE1L3	-2.91383	1.73525	-19.549	7.18e-65	6.64e-63	136.938
C13orf46	-2.50785	1.38685	-19.4749	1.69e-64	1.55e-62	136.087
NPR1	-2.84918	3.18139	-19.4734	1.71e-64	1.57e-62	136.071
PHACTR1	-1.85417	1.50019	-19.4646	1.9e-64	1.73e-62	135.97
SMAD6	-2.14761	2.60538	-19.4033	3.84e-64	3.47e-62	135.268
TAMALIN	-2.29625	3.48621	-19.3735	5.41e-64	4.87e-62	134.926
DPEP2	-2.08995	2.25965	-19.29	1.41e-63	1.27e-61	133.97
VIPR1	-2.97052	2.77823	-19.2407	2.49e-63	2.22e-61	133.406
SBSPON	-2.38704	1.80966	-19.2265	2.93e-63	2.6e-61	133.244
GIMAP1	-1.87039	2.39822	-19.1207	9.87e-63	8.71e-61	132.035
CAT	-2.07425	6.48082	-19.0958	1.31e-62	1.15e-60	131.75
PKNOX2	-2.0211	1.47684	-19.0779	1.61e-62	1.41e-60	131.546
ADRB1	-3.18849	2.08618	-19.0144	3.34e-62	2.91e-60	130.821
UBE2T	2.72858	4.64054	18.9466	7.26e-62	6.29e-60	130.048
PRKCE	-1.72635	2.84656	-18.9272	9.06e-62	7.82e-60	129.827
CPB2	-3.19498	1.36406	-18.8611	1.93e-61	1.66e-59	129.073
TRHDE	-1.39247	0.466467	-18.8427	2.38e-61	2.04e-59	128.864
SNX22	-1.90237	1.69377	-18.8345	2.62e-61	2.23e-59	128.77
CLDN5	-2.91828	4.42344	-18.7951	4.11e-61	3.48e-59	128.321
DACH1	-2.29901	1.68215	-18.7944	4.14e-61	3.5e-59	128.313
MMRN2	-2.14124	3.9899	-18.7544	6.54e-61	5.5e-59	127.858
COL6A6	-2.69501	1.76431	-18.6787	1.55e-60	1.29e-58	126.998
ANGPTL1	-2.25943	1.63953	-18.671	1.7e-60	1.41e-58	126.91
GOLM1	2.37677	7.37144	18.6028	3.69e-60	3.05e-58	126.134
TCEAL2	-2.1143	0.962105	-18.5967	3.96e-60	3.26e-58	126.065
TMEM177	1.38221	3.75888	18.581	4.74e-60	3.88e-58	125.887
EFNA4	1.99221	5.16267	18.5471	6.97e-60	5.68e-58	125.502
SLC14A1	-1.84533	0.974236	-18.5227	9.2e-60	7.47e-58	125.226
GIMAP6	-2.22071	4.28388	-18.5206	9.42e-60	7.62e-58	125.202
CSRNP1	-2.29441	5.62837	-18.4511	2.08e-59	1.67e-57	124.414
RHOJ	-1.84212	3.30674	-18.4403	2.35e-59	1.89e-57	124.291
MPIG6B	-1.01706	0.614275	-18.4369	2.44e-59	1.95e-57	124.252
LRRC32	-2.24217	4.59809	-18.4326	2.57e-59	2.03e-57	124.204
HSPB6	-2.50259	2.01062	-18.4309	2.62e-59	2.06e-57	124.185
RSPO2	-2.11104	0.978041	-18.3972	3.84e-59	3.02e-57	123.802
CXCR2	-2.01737	1.41149	-18.3839	4.47e-59	3.5e-57	123.651
RASGRP4	-1.67017	1.76566	-18.368	5.36e-59	4.17e-57	123.472
AOC3	-2.92747	5.16355	-18.3566	6.1e-59	4.73e-57	123.342
GLIPR2	-2.35374	5.23209	-18.3553	6.19e-59	4.78e-57	123.328
ART4	-1.55121	0.848577	-18.3157	9.71e-59	7.44e-57	122.879
PPP1R14B	1.94996	7.17837	18.3113	1.02e-58	7.79e-57	122.83
FAM83A	4.5187	4.71609	18.2925	1.26e-58	9.61e-57	122.617
ADGRE1	-2.2449	1.49296	-18.2913	1.28e-58	9.7e-57	122.604
RAI2	-2.28905	3.6825	-18.2896	1.31e-58	9.85e-57	122.585
ANOS1	-3.08598	3.89091	-18.2821	1.42e-58	1.07e-56	122.499
HHIP	-3.33286	1.78516	-18.2754	1.53e-58	1.15e-56	122.423
ALDH18A1	1.49755	6.37677	18.2694	1.64e-58	1.23e-56	122.356
CLDN18	-6.31502	4.2593	-18.2542	1.95e-58	1.45e-56	122.184
HBB	-4.86308	5.82479	-18.2511	2.02e-58	1.5e-56	122.149
SYNC	-1.48634	1.41952	-18.2416	2.25e-58	1.66e-56	122.041
CASQ2	-1.96224	1.10128	-18.2082	3.29e-58	2.42e-56	121.664
TMEM88	-2.10732	3.08849	-18.2025	3.51e-58	2.57e-56	121.599
ADAMTSL3	-2.06749	1.68021	-18.1589	5.76e-58	4.2e-56	121.107
ETV4	3.13376	4.73672	18.1362	7.45e-58	5.41e-56	120.85
FOLR3	-2.37869	0.984172	-18.1195	9e-58	6.51e-56	120.662
GLDN	-2.27733	1.86397	-18.1094	1.01e-57	7.28e-56	120.547
CTHRC1	3.48173	6.13543	18.0881	1.29e-57	9.23e-56	120.307
THBD	-2.64038	5.00643	-18.085	1.33e-57	9.52e-56	120.273
ADPRH	-1.62319	3.62043	-17.9763	4.56e-57	3.21e-55	119.047
IL3RA	-1.67712	3.53021	-17.9761	4.57e-57	3.21e-55	119.044
PI16	-2.56979	1.21862	-17.9308	7.63e-57	5.34e-55	118.534
SEMA5A	-2.63007	2.65461	-17.9126	9.37e-57	6.54e-55	118.329
SLIT2	-2.47265	3.033	-17.8718	1.49e-56	1.03e-54	117.87
PLCL1	-1.39726	1.50584	-17.8519	1.86e-56	1.28e-54	117.647
SULT1C4	-2.12044	2.13821	-17.84	2.13e-56	1.46e-54	117.512
PIP5K1B	-2.45787	2.48634	-17.8303	2.37e-56	1.63e-54	117.403
ARHGAP31	-2.28843	3.84247	-17.822	2.61e-56	1.78e-54	117.311
SPAG4	2.26844	3.98468	17.8073	3.08e-56	2.09e-54	117.145
MME	-2.9146	2.33401	-17.7695	4.72e-56	3.2e-54	116.72
B3GNT3	3.55839	4.91005	17.7489	5.95e-56	4.02e-54	116.489
GYPC	-1.84932	4.16537	-17.7063	9.62e-56	6.48e-54	116.01
TOP2A	3.20364	5.1804	17.7035	9.92e-56	6.66e-54	115.979
CORO2B	-1.95292	1.82818	-17.6975	1.06e-55	7.1e-54	115.912
TEDC2	2.14627	2.60107	17.6755	1.36e-55	9.07e-54	115.665
TIE1	-2.01094	3.77305	-17.6712	1.43e-55	9.49e-54	115.617
FAM162B	-2.30028	2.91358	-17.6678	1.48e-55	9.82e-54	115.579
TMEM184A	2.44457	3.79946	17.6569	1.68e-55	1.11e-53	115.457
CYP1A2	-1.33511	0.290401	-17.6458	1.9e-55	1.25e-53	115.332
SESN1	-1.66447	3.61732	-17.6437	1.95e-55	1.28e-53	115.309
PALMD	-2.00132	2.51745	-17.6346	2.16e-55	1.41e-53	115.207
CD93	-2.34264	5.43877	-17.6338	2.18e-55	1.42e-53	115.198
CAVIN1	-2.2632	7.43047	-17.6195	2.56e-55	1.66e-53	115.037
ADM2	2.44743	3.23477	17.6096	2.86e-55	1.85e-53	114.926
PEAR1	-1.86141	2.37152	-17.5421	6.11e-55	3.92e-53	114.17
ODF3L1	-1.74837	1.33796	-17.514	8.38e-55	5.36e-53	113.855
DKK2	-2.03332	1.98029	-17.4922	1.07e-54	6.82e-53	113.612
ADH1B	-4.14852	3.27964	-17.4898	1.1e-54	6.99e-53	113.585
COX7A1	-1.96572	4.75507	-17.4753	1.29e-54	8.2e-53	113.423
CDC20	3.15038	4.9977	17.4328	2.08e-54	1.32e-52	112.948
PLA2G4F	-3.08955	2.83892	-17.3837	3.62e-54	2.28e-52	112.399
DENND3	-1.74023	3.51304	-17.3736	4.05e-54	2.54e-52	112.286
RADIL	-1.80373	1.26543	-17.3734	4.06e-54	2.54e-52	112.284
DES	-3.52844	3.23227	-17.3649	4.47e-54	2.78e-52	112.19
GPBAR1	-1.33803	1.19974	-17.3277	6.78e-54	4.2e-52	111.774
HBEGF	-2.64975	4.74899	-17.3172	7.62e-54	4.71e-52	111.657
CAMP	-2.41079	1.47182	-17.3099	8.27e-54	5.09e-52	111.576
VEPH1	-2.99023	2.66368	-17.2863	1.08e-53	6.61e-52	111.312
PRSS35	-1.56738	0.923776	-17.2643	1.38e-53	8.43e-52	111.068
C1QTNF7	-2.22579	1.61335	-17.2598	1.45e-53	8.84e-52	111.017
FXYD6	-1.69809	2.24104	-17.236	1.89e-53	1.15e-51	110.752
GHR	-1.50507	1.09428	-17.2255	2.13e-53	1.29e-51	110.635
RAPGEF4	-1.57697	1.78481	-17.2241	2.16e-53	1.31e-51	110.619
AFF3	-2.06388	1.32752	-17.2178	2.32e-53	1.4e-51	110.549
CGNL1	-2.3746	3.84242	-17.2078	2.6e-53	1.56e-51	110.438
COX4I2	-2.39461	4.22976	-17.2076	2.6e-53	1.56e-51	110.436
TRPV2	-1.95599	4.42851	-17.206	2.65e-53	1.58e-51	110.418
ABI3BP	-2.69135	3.10208	-17.1972	2.92e-53	1.74e-51	110.32
ST6GALNAC3	-1.46599	1.21757	-17.1877	3.25e-53	1.93e-51	110.214
ABCG2	-1.77012	1.91909	-17.1868	3.28e-53	1.94e-51	110.205
CCL23	-2.59894	2.36368	-17.1812	3.49e-53	2.06e-51	110.141
DNASE2B	-2.04769	1.18147	-17.1471	5.11e-53	3e-51	109.763
VSIR	-1.69753	5.04709	-17.1239	6.62e-53	3.88e-51	109.505
PLPP2	2.40541	4.91457	17.12	6.92e-53	4.04e-51	109.461
PNPLA6	-1.53199	4.98244	-17.0992	8.73e-53	5.08e-51	109.23
LMCD1	-1.71027	3.69916	-17.0934	9.31e-53	5.4e-51	109.166
CAV2	-2.77796	5.26759	-17.0829	1.05e-52	6.06e-51	109.049
NIM1K	-1.77054	1.1379	-17.0667	1.25e-52	7.24e-51	108.869
IQGAP3	2.58801	3.41819	17.0519	1.48e-52	8.51e-51	108.704
CPED1	-2.06082	2.39376	-17.0057	2.48e-52	1.42e-50	108.192
SASH1	-1.828	3.49901	-16.9867	3.06e-52	1.74e-50	107.981
SPRYD7	-1.27533	3.94105	-16.9794	3.32e-52	1.89e-50	107.9
NME1	1.83691	4.01273	16.9767	3.42e-52	1.94e-50	107.87
CXCR1	-1.90069	1.07943	-16.9729	3.57e-52	2.02e-50	107.828
LAMP3	-3.40116	6.16604	-16.9706	3.66e-52	2.06e-50	107.803
SELP	-2.36485	2.93455	-16.9429	4.99e-52	2.8e-50	107.495
TMEM204	-1.83689	4.88313	-16.9394	5.19e-52	2.9e-50	107.456
ZNF366	-1.29494	1.09544	-16.9392	5.2e-52	2.9e-50	107.455
SPN	-2.36143	3.45916	-16.9347	5.46e-52	3.04e-50	107.405
LHFPL6	-1.75532	4.40522	-16.8785	1.02e-51	5.67e-50	106.782
TSPAN18	-2.03738	3.26756	-16.8745	1.07e-51	5.91e-50	106.738
KANK2	-1.67304	5.26587	-16.8703	1.12e-51	6.17e-50	106.691
BCHE	-2.35551	1.79963	-16.8601	1.25e-51	6.89e-50	106.579
SLIT3	-2.61386	2.65269	-16.8547	1.33e-51	7.3e-50	106.519
TNXB	-2.77227	2.35404	-16.8507	1.39e-51	7.6e-50	106.475
HSPB3	-1.6393	0.882414	-16.8505	1.39e-51	7.6e-50	106.473
ZNF423	-1.32043	1.24407	-16.8206	1.94e-51	1.06e-49	106.142
GPX3	-2.68599	7.48378	-16.8109	2.16e-51	1.17e-49	106.035
ANXA8L1	-2.29502	1.02005	-16.7996	2.45e-51	1.32e-49	105.909
LGI4	-1.18074	1.31746	-16.7681	3.48e-51	1.87e-49	105.561
MAMDC2	-3.00016	2.86596	-16.741	4.7e-51	2.51e-49	105.263
INKA2	-1.46798	2.1672	-16.737	4.91e-51	2.62e-49	105.218
FGR	-2.21481	4.39553	-16.7121	6.48e-51	3.44e-49	104.943
TBX3	-2.05937	2.72072	-16.6949	7.84e-51	4.15e-49	104.753
FGF2	-1.72754	1.42587	-16.6918	8.1e-51	4.28e-49	104.72
PAICS	1.65864	5.56116	16.6914	8.14e-51	4.29e-49	104.716
TNS1	-2.35067	5.63346	-16.6803	9.21e-51	4.84e-49	104.593
ANGPT1	-2.37738	2.50044	-16.6774	9.51e-51	4.98e-49	104.561
FAM124B	-1.33407	1.3441	-16.6617	1.13e-50	5.91e-49	104.388
BDNF	-1.56707	0.745632	-16.6614	1.13e-50	5.91e-49	104.385
HEG1	-2.24673	4.68072	-16.6085	2.04e-50	1.06e-48	103.802
RCC1	1.57277	5.51998	16.6	2.24e-50	1.15e-48	103.708
LILRA5	-2.08318	2.69552	-16.4491	1.19e-49	6.08e-48	102.049
CD300C	-2.14835	2.9765	-16.4273	1.51e-49	7.71e-48	101.81
FLI1	-1.70936	3.30479	-16.4196	1.64e-49	8.38e-48	101.725
MFAP3L	-1.63308	1.27313	-16.4127	1.77e-49	9.01e-48	101.649
GPM6B	-2.02182	2.55572	-16.4088	1.85e-49	9.38e-48	101.607
LTBP4	-2.32462	5.30055	-16.4047	1.93e-49	9.79e-48	101.562
ST6GALNAC5	-2.20962	2.38104	-16.4002	2.03e-49	1.03e-47	101.513
RILPL2	-1.35485	3.89436	-16.3905	2.26e-49	1.14e-47	101.406
SLC5A9	-2.01429	1.22565	-16.3743	2.71e-49	1.36e-47	101.228
ESAM	-2.18965	5.62556	-16.3731	2.74e-49	1.37e-47	101.215
DUOX1	-3.22305	3.62863	-16.3632	3.05e-49	1.53e-47	101.107
RXRG	-2.18765	1.18832	-16.3427	3.83e-49	1.91e-47	100.882
KIF20A	2.37215	3.56927	16.3344	4.2e-49	2.08e-47	100.791
COL10A1	3.66795	4.54341	16.2924	6.66e-49	3.3e-47	100.332
FFAR4	-2.01638	1.60505	-16.2904	6.81e-49	3.37e-47	100.309
JCAD	-2.13913	4.02262	-16.2812	7.53e-49	3.71e-47	100.21
UBE2C	3.42445	5.57471	16.279	7.72e-49	3.8e-47	100.185
CDCA8	2.43595	4.1882	16.2602	9.49e-49	4.66e-47	99.9792
PDZD2	-2.37102	2.50789	-16.2428	1.15e-48	5.62e-47	99.7889
CCNB1	2.45406	5.17214	16.2205	1.47e-48	7.15e-47	99.5452
SPTBN1	-1.82481	6.11811	-16.2089	1.67e-48	8.09e-47	99.4188
CD52	-2.58718	6.56987	-16.2086	1.67e-48	8.1e-47	99.4151
CRYAB	-2.13103	3.00022	-16.2081	1.68e-48	8.12e-47	99.4101
TACC1	-2.00512	4.75985	-16.1925	2e-48	9.62e-47	99.2393
PEAK1	-1.57945	2.90375	-16.1815	2.25e-48	1.08e-46	99.12
SYNM	-1.6304	2.45711	-16.1734	2.46e-48	1.18e-46	99.0317
DAPK2	-1.90811	2.45884	-16.1599	2.85e-48	1.36e-46	98.8845
RCAN1	-1.76045	4.17826	-16.1594	2.87e-48	1.37e-46	98.8786
F8	-1.59916	2.62982	-16.1592	2.88e-48	1.37e-46	98.8761
SCN7A	-2.59305	2.51569	-16.1495	3.2e-48	1.51e-46	98.7707
ATP1A2	-1.65539	1.10886	-16.1298	3.97e-48	1.88e-46	98.5552
RETN	-3.68162	3.01499	-16.1152	4.65e-48	2.19e-46	98.3967
STX12	-1.0584	5.87233	-16.1022	5.36e-48	2.52e-46	98.2554
PPP1R15A	-1.82112	6.49855	-16.0931	5.93e-48	2.78e-46	98.1562
GUCY1A2	-1.80688	1.73851	-16.0893	6.18e-48	2.88e-46	98.1147
METTL7A	-2.17911	5.81666	-16.0824	6.67e-48	3.09e-46	98.0388
SAPCD2	2.27541	2.72422	16.0706	7.58e-48	3.51e-46	97.9111
NOTCH4	-1.72145	3.08829	-16.0694	7.68e-48	3.54e-46	97.8979
MFNG	-1.62828	4.22755	-16.0684	7.77e-48	3.58e-46	97.8865
FUT2	2.47987	3.89801	16.0639	8.16e-48	3.75e-46	97.838
MS4A7	-2.36394	4.52256	-16.0604	8.48e-48	3.88e-46	97.7994
OCIAD2	1.90382	6.77379	16.0501	9.5e-48	4.34e-46	97.6872
SPTBN2	2.05836	3.79934	16.042	1.04e-47	4.72e-46	97.6
RMI2	1.83059	3.52594	16.0395	1.07e-47	4.84e-46	97.5727
ADTRP	-2.01638	1.84378	-16.032	1.16e-47	5.25e-46	97.4901
FGFR4	-2.83336	3.16389	-16.0115	1.45e-47	6.55e-46	97.2673
WFS1	-1.8045	5.25137	-15.9844	1.95e-47	8.79e-46	96.9728
ADARB1	-1.66333	3.09826	-15.9832	1.97e-47	8.89e-46	96.9596
KLF6	-1.8523	6.51799	-15.9798	2.05e-47	9.19e-46	96.9234
HPSE2	-1.46512	0.77976	-15.9626	2.47e-47	1.11e-45	96.7361
C1QTNF2	-1.50275	1.51614	-15.9596	2.55e-47	1.14e-45	96.7032
GFOD1	-1.54742	1.85945	-15.9512	2.8e-47	1.25e-45	96.612
EZH2	1.97879	3.59864	15.9468	2.93e-47	1.31e-45	96.5647
SFRP5	-2.481	1.29422	-15.946	2.96e-47	1.31e-45	96.5563
PRAM1	-2.04736	2.64801	-15.9349	3.34e-47	1.48e-45	96.4355
ELAPOR2	-2.18047	3.0491	-15.9295	3.54e-47	1.57e-45	96.377
SEPTIN4	-1.21685	1.83707	-15.9191	3.97e-47	1.75e-45	96.2639
ADCY4	-1.49015	2.13871	-15.9177	4.03e-47	1.77e-45	96.2492
PKHD1L1	-1.15891	0.582617	-15.9173	4.05e-47	1.78e-45	96.244
CBX7	-1.69422	3.51245	-15.9095	4.41e-47	1.93e-45	96.1599
SFTPC	-8.17405	7.38001	-15.9093	4.42e-47	1.93e-45	96.1574
PAFAH1B3	1.98113	5.51952	15.8911	5.39e-47	2.35e-45	95.96
SFXN1	1.30361	4.26276	15.8726	6.59e-47	2.87e-45	95.7593
GIMAP7	-1.99203	5.09699	-15.8694	6.82e-47	2.96e-45	95.7253
BCL6B	-1.68625	3.44439	-15.868	6.93e-47	3e-45	95.7093
BIRC5	2.88208	4.33583	15.8637	7.26e-47	3.14e-45	95.6626
SPP1	4.4109	7.87517	15.84	9.4e-47	4.05e-45	95.406
PTH1R	-1.7576	1.90135	-15.8396	9.44e-47	4.05e-45	95.4022
EPN3	2.28113	3.20184	15.8363	9.78e-47	4.19e-45	95.3667
FAM189A1	-1.29854	0.651682	-15.8004	1.45e-46	6.15e-45	94.9779
P2RY1	-1.60624	2.08342	-15.783	1.75e-46	7.42e-45	94.7891
INPP5K	-1.11795	4.78104	-15.7821	1.77e-46	7.48e-45	94.7789
PLK1	2.30027	3.35122	15.7716	1.98e-46	8.37e-45	94.6655
NDST1	-1.60824	5.20169	-15.7516	2.46e-46	1.04e-44	94.4491
ITGA8	-2.25503	2.96744	-15.7466	2.6e-46	1.09e-44	94.3952
CCNB2	2.36852	4.00698	15.7169	3.58e-46	1.5e-44	94.0749
KRT4	-3.59557	2.21687	-15.7127	3.75e-46	1.57e-44	94.0296
ITM2A	-2.161	4.79733	-15.7126	3.75e-46	1.57e-44	94.0287
BMPER	-1.77163	0.995782	-15.6996	4.32e-46	1.8e-44	93.8881
NEK2	2.58522	3.4213	15.6968	4.46e-46	1.86e-44	93.8574
C8B	-2.77917	1.36586	-15.693	4.65e-46	1.93e-44	93.8161
VWF	-2.53161	5.89429	-15.6762	5.57e-46	2.31e-44	93.6358
SPAG5	2.28875	3.57369	15.6748	5.65e-46	2.34e-44	93.6205
MSRB3	-1.97518	3.4115	-15.6714	5.87e-46	2.42e-44	93.5836
CNTFR	-1.65549	0.773634	-15.6559	6.94e-46	2.86e-44	93.4162
MSR1	-2.60353	4.52756	-15.6485	7.52e-46	3.09e-44	93.3366
MEFV	-1.13789	0.985114	-15.6461	7.73e-46	3.17e-44	93.3101
ITIH5	-2.24609	2.16357	-15.6438	7.92e-46	3.24e-44	93.2854
OSCAR	-2.37008	4.1264	-15.6375	8.48e-46	3.46e-44	93.2174
ZWINT	2.2279	4.94362	15.6366	8.56e-46	3.49e-44	93.2078
TPX2	2.92242	4.87146	15.6278	9.42e-46	3.83e-44	93.1128
AFAP1L1	-1.62516	2.96208	-15.6249	9.71e-46	3.94e-44	93.0826
AVPR2	-1.43259	0.994867	-15.6083	1.16e-45	4.71e-44	92.9033
KIF2C	2.57785	3.62607	15.5843	1.51e-45	6.09e-44	92.645
CASS4	-1.8011	2.4094	-15.5646	1.87e-45	7.53e-44	92.4326
RECQL4	2.21771	3.54613	15.5627	1.9e-45	7.66e-44	92.4127
CBLC	2.58595	4.71016	15.5564	2.04e-45	8.19e-44	92.3442
SLC27A6	-1.36832	0.473172	-15.5538	2.1e-45	8.41e-44	92.3162
KCNAB1	-1.21037	1.28636	-15.5387	2.47e-45	9.85e-44	92.1536
CNRIP1	-1.48485	2.93604	-15.5386	2.47e-45	9.85e-44	92.1528
MMP11	3.94561	4.75373	15.5277	2.78e-45	1.11e-43	92.0361
ECRG4	-2.84142	1.88303	-15.5164	3.14e-45	1.25e-43	91.9144
WASF3	-1.69276	1.93966	-15.5162	3.15e-45	1.25e-43	91.912
IL1RL1	-2.77333	1.70877	-15.5053	3.54e-45	1.4e-43	91.7953
MFAP4	-3.17591	6.68558	-15.505	3.55e-45	1.4e-43	91.792
AGTR1	-1.85429	1.37644	-15.4946	3.98e-45	1.56e-43	91.6799
LGR4	2.23694	4.70459	15.4812	4.59e-45	1.8e-43	91.5362
TGFBR2	-1.87392	6.41856	-15.47	5.19e-45	2.03e-43	91.4155
SYNE3	-1.35477	1.49143	-15.456	6.03e-45	2.36e-43	91.2652
IL17D	-1.17099	1.24157	-15.453	6.23e-45	2.43e-43	91.2339
RNF144B	-1.87721	4.45173	-15.4393	7.22e-45	2.81e-43	91.0862
C1orf162	-1.93728	4.57556	-15.4372	7.38e-45	2.86e-43	91.0643
KCNA5	-1.23171	0.832774	-15.4183	9.06e-45	3.51e-43	90.8609
OLR1	-2.9225	4.96845	-15.4165	9.24e-45	3.57e-43	90.8413
PLPP3	-1.4278	5.02254	-15.4163	9.26e-45	3.57e-43	90.8393
HMGCLL1	-1.15613	0.83292	-15.4135	9.54e-45	3.67e-43	90.8094
UHRF1	2.21874	2.92832	15.4121	9.68e-45	3.72e-43	90.795
SH3GL2	-1.8397	0.727094	-15.3954	1.16e-44	4.44e-43	90.6161
SEMA6D	-1.92813	1.55773	-15.3934	1.18e-44	4.53e-43	90.5941
PCDHGB7	-1.48492	1.65043	-15.3673	1.57e-44	5.99e-43	90.3147
KCNK3	-2.76269	2.52359	-15.3585	1.72e-44	6.57e-43	90.2206
WNT7A	-2.45182	1.28382	-15.3511	1.87e-44	7.1e-43	90.1412
TRIM58	-1.53629	0.633123	-15.3475	1.94e-44	7.36e-43	90.1031
HMGB3	2.89465	7.02403	15.3465	1.96e-44	7.43e-43	90.0919
PREX2	-1.70263	1.64739	-15.3372	2.17e-44	8.2e-43	89.992
MYBL2	3.27106	4.92965	15.3329	2.27e-44	8.57e-43	89.9461
SEC14L3	-1.60437	0.536495	-15.3304	2.33e-44	8.79e-43	89.9194
ABHD6	-1.22857	3.04908	-15.3219	2.55e-44	9.6e-43	89.8293
KIF4A	2.53637	3.21601	15.3214	2.57e-44	9.64e-43	89.8237
NKAPL	-1.03999	0.701406	-15.3211	2.58e-44	9.65e-43	89.8204
TBX4	-2.33436	3.02506	-15.3201	2.61e-44	9.74e-43	89.8092
LGALSL	-1.91716	4.10867	-15.311	2.87e-44	1.07e-42	89.7118
SNRK	-1.15486	3.83296	-15.294	3.45e-44	1.28e-42	89.5307
HPS5	-1.14917	4.10787	-15.2928	3.49e-44	1.3e-42	89.5178
CEP55	2.48268	3.92216	15.2893	3.63e-44	1.35e-42	89.4801
SSTR1	-2.37637	1.68643	-15.2726	4.34e-44	1.61e-42	89.3019
KIF26B	2.17398	3.04011	15.2707	4.43e-44	1.64e-42	89.2819
GPT2	2.52657	4.43972	15.2664	4.64e-44	1.71e-42	89.2357
HJURP	2.53223	3.15836	15.2586	5.04e-44	1.85e-42	89.1527
ADAMTS1	-2.33366	4.096	-15.2544	5.28e-44	1.93e-42	89.1077
SPARCL1	-2.16409	7.16449	-15.2506	5.5e-44	2.01e-42	89.0664
AURKB	2.55999	3.6811	15.2498	5.55e-44	2.02e-42	89.0577
GAS6	-1.95617	5.35868	-15.2448	5.85e-44	2.13e-42	89.0048
MYL9	-1.9233	7.45078	-15.2266	7.11e-44	2.58e-42	88.8109
S100A3	-2.19098	2.77085	-15.2188	7.73e-44	2.8e-42	88.7279
PDIA4	1.59115	8.57467	15.2163	7.94e-44	2.87e-42	88.7007
MARCO	-3.91858	5.89251	-15.2126	8.26e-44	2.98e-42	88.6613
CD34	-1.68495	4.16941	-15.2115	8.36e-44	3.01e-42	88.6495
MMRN1	-2.27881	2.48352	-15.2057	8.89e-44	3.19e-42	88.5883
C5AR1	-2.10674	4.77871	-15.195	9.97e-44	3.57e-42	88.4742
SYNPO	-1.86274	5.27141	-15.1939	1.01e-43	3.61e-42	88.4616
DLC1	-2.54108	4.22073	-15.1852	1.11e-43	3.95e-42	88.3689
KIF1C	-1.37215	5.7071	-15.1773	1.21e-43	4.29e-42	88.2855
SFXN4	1.24155	5.28013	15.1692	1.32e-43	4.67e-42	88.1986
CFD	-2.80004	5.71201	-15.1618	1.42e-43	5.05e-42	88.1196
FAM13C	-1.17963	1.10337	-15.1599	1.45e-43	5.14e-42	88.0999
SNCA	-1.05311	0.943882	-15.1401	1.8e-43	6.35e-42	87.8885
LDLR	-2.05525	5.31946	-15.1314	1.97e-43	6.95e-42	87.7965
DLGAP5	2.51249	3.31304	15.1167	2.31e-43	8.12e-42	87.6396
ORC6	1.80053	2.36997	15.1156	2.33e-43	8.2e-42	87.6281
CASKIN2	-1.60196	4.37016	-15.1143	2.37e-43	8.3e-42	87.6147
LILRA1	-1.06689	1.09008	-15.0955	2.89e-43	1.01e-41	87.4149
KRT79	-1.05788	0.395666	-15.0943	2.93e-43	1.02e-41	87.4012
GPER1	-1.95645	2.00513	-15.0932	2.96e-43	1.03e-41	87.3905
EFNA3	1.8354	2.54815	15.085	3.24e-43	1.13e-41	87.3031
DOCK4	-1.60036	3.1098	-15.0806	3.39e-43	1.18e-41	87.2561
FILIP1	-1.6962	1.65163	-15.0781	3.49e-43	1.21e-41	87.2294
SYNDIG1L	-1.69113	0.934791	-15.0774	3.51e-43	1.22e-41	87.222
CRTAC1	-3.63739	3.89067	-15.0648	4.02e-43	1.39e-41	87.0884
S1PR4	-1.81	3.6271	-15.0596	4.25e-43	1.47e-41	87.0325
GINS1	2.10999	3.19294	15.059	4.27e-43	1.47e-41	87.0265
NHSL1	-1.84377	3.23237	-15.0582	4.31e-43	1.48e-41	87.018
FAM136A	1.08604	5.42904	15.0527	4.57e-43	1.57e-41	86.9594
LEPR	-2.06793	2.58067	-15.0474	4.84e-43	1.66e-41	86.9038
ANLN	2.72342	3.89161	15.0473	4.84e-43	1.66e-41	86.9027
MYADM	-1.94494	6.12889	-15.0446	4.99e-43	1.7e-41	86.8732
RECK	-1.53788	2.88189	-15.0286	5.91e-43	2.02e-41	86.7038
WIF1	-4.76927	3.71852	-15.0256	6.11e-43	2.08e-41	86.6716
DENND2A	-1.77687	2.68039	-15.0218	6.36e-43	2.16e-41	86.6313
PLEKHN1	1.94875	2.59273	15.0212	6.4e-43	2.17e-41	86.6248
TMPRSS4	3.45939	4.19253	15.009	7.29e-43	2.47e-41	86.4959
EML1	-1.66109	2.44099	-15.0035	7.73e-43	2.61e-41	86.4378
CCBE1	-2.45967	1.81292	-15.0004	7.99e-43	2.69e-41	86.4046
FLAD1	1.24641	5.2859	14.9977	8.22e-43	2.77e-41	86.3756
NUF2	2.38568	3.0696	14.9959	8.38e-43	2.82e-41	86.3569
RAB40A	-1.01023	0.882892	-14.9958	8.39e-43	2.82e-41	86.3554
SYNPO2	-1.64734	1.91336	-14.9934	8.6e-43	2.88e-41	86.3306
VSIG4	-2.79143	5.82519	-14.9927	8.67e-43	2.9e-41	86.3231
NXF3	-1.66845	0.839115	-14.9914	8.8e-43	2.94e-41	86.3087
TMEM273	-1.6802	3.27052	-14.9878	9.14e-43	3.04e-41	86.2709
SERINC1	-1.24727	7.66734	-14.9764	1.03e-42	3.43e-41	86.1501
ENG	-1.68504	6.6929	-14.9689	1.12e-42	3.7e-41	86.0708
WFDC1	-1.53065	1.53649	-14.9671	1.14e-42	3.77e-41	86.052
MSTO1	1.22451	3.31545	14.9612	1.21e-42	4.01e-41	85.9888
CDC6	2.34302	3.25061	14.953	1.32e-42	4.36e-41	85.9026
AMOTL1	-1.87927	3.71591	-14.9479	1.4e-42	4.6e-41	85.8487
SLCO1A2	-1.4784	0.51408	-14.9411	1.5e-42	4.94e-41	85.7765
ZBED2	-2.3787	2.72053	-14.9395	1.53e-42	5.01e-41	85.7599
EDN3	-1.00292	0.294245	-14.9373	1.56e-42	5.12e-41	85.7364
SRPK1	1.36898	4.29559	14.9367	1.57e-42	5.15e-41	85.7298
IGSF9	2.41617	3.31946	14.9212	1.86e-42	6.06e-41	85.5655
GKN2	-4.36061	2.82758	-14.9109	2.07e-42	6.75e-41	85.4567
AGTPBP1	-1.24743	3.73843	-14.9046	2.21e-42	7.21e-41	85.39
MANF	1.25614	6.82135	14.9043	2.22e-42	7.21e-41	85.3872
AGTR2	-3.38156	1.96416	-14.9008	2.3e-42	7.47e-41	85.3504
PPP1R14A	-2.05031	4.07495	-14.8933	2.5e-42	8.08e-41	85.2707
CCN5	-2.15159	2.87103	-14.8875	2.66e-42	8.58e-41	85.2093
SLC1A1	-2.5819	3.81995	-14.8773	2.96e-42	9.53e-41	85.102
ITPRIP	-1.59926	3.68899	-14.8659	3.34e-42	1.07e-40	84.9811
PPM1F	-1.19175	3.436	-14.8644	3.39e-42	1.09e-40	84.9653
QKI	-1.43266	4.3518	-14.8562	3.7e-42	1.19e-40	84.8784
SLC25A10	1.65545	3.12307	14.8286	4.96e-42	1.59e-40	84.5872
KLF4	-2.56582	4.70032	-14.8254	5.14e-42	1.64e-40	84.5532
PEBP4	-4.34595	4.47361	-14.8117	5.94e-42	1.89e-40	84.409
RRM2	2.41634	3.70557	14.8093	6.09e-42	1.94e-40	84.3838
PCOLCE2	-2.66293	2.543	-14.8091	6.11e-42	1.94e-40	84.381
PPAT	1.49691	3.39806	14.8009	6.66e-42	2.11e-40	84.2952
PDE5A	-1.66906	2.8427	-14.7964	6.99e-42	2.21e-40	84.2475
KAT2A	1.55742	5.5353	14.792	7.32e-42	2.32e-40	84.2007
IL33	-2.65025	4.41616	-14.7725	9e-42	2.84e-40	83.9956
PDK4	-2.80532	4.69178	-14.7723	9.02e-42	2.84e-40	83.9931
ACE	-1.81534	3.74969	-14.7679	9.45e-42	2.97e-40	83.947
TBX2	-1.92749	3.79602	-14.7642	9.83e-42	3.09e-40	83.9079
ROR1	-1.87781	2.40426	-14.7624	1e-41	3.14e-40	83.8888
ATIC	1.14569	6.26618	14.7421	1.24e-41	3.89e-40	83.6751
FKBP11	1.43722	4.34598	14.7405	1.26e-41	3.95e-40	83.6585
CCDC69	-1.76179	4.89569	-14.7403	1.27e-41	3.95e-40	83.6564
LHFPL3	-2.02722	1.13587	-14.7265	1.46e-41	4.56e-40	83.5114
MELK	2.50174	3.41895	14.7179	1.6e-41	4.99e-40	83.4209
ANKRD29	-2.60772	2.98793	-14.7103	1.74e-41	5.4e-40	83.3407
REM1	-1.26333	1.51625	-14.7096	1.75e-41	5.43e-40	83.3331
PSAT1	2.70529	4.56233	14.7069	1.8e-41	5.58e-40	83.3052
RANBP3L	-1.30103	0.981249	-14.6914	2.12e-41	6.55e-40	83.1425
KDELR3	1.94459	6.02653	14.6851	2.27e-41	6.99e-40	83.0759
FERMT1	2.34808	3.7481	14.6789	2.42e-41	7.44e-40	83.0107
PCDH12	-1.62574	3.47196	-14.6593	2.98e-41	9.14e-40	82.8043
TMEM47	-1.87201	3.9686	-14.6555	3.1e-41	9.5e-40	82.765
IQANK1	1.91119	4.36745	14.6513	3.24e-41	9.92e-40	82.7205
TLR4	-1.67795	2.64189	-14.6308	4.02e-41	1.23e-39	82.506
TMOD1	-1.63678	1.87823	-14.6229	4.38e-41	1.33e-39	82.4226
PHACTR2	-1.59502	3.51505	-14.6217	4.43e-41	1.34e-39	82.4102
HSD17B6	-3.2112	4.38716	-14.6115	4.94e-41	1.5e-39	82.3028
TINCR	-2.08678	1.38239	-14.6052	5.27e-41	1.59e-39	82.2373
GGCT	1.48633	5.53652	14.5787	6.97e-41	2.11e-39	81.9595
CDH13	-1.47465	1.33589	-14.576	7.17e-41	2.16e-39	81.9309
SVEP1	-2.16803	2.47715	-14.5711	7.55e-41	2.27e-39	81.8798
SLC50A1	1.56117	6.91481	14.5636	8.18e-41	2.45e-39	81.801
PDE2A	-1.4221	1.85422	-14.5568	8.78e-41	2.63e-39	81.7296
HSPB8	-2.24456	4.53444	-14.5553	8.92e-41	2.67e-39	81.7144
CENPF	2.38008	3.34696	14.5543	9.01e-41	2.69e-39	81.7041
FERMT2	-1.45961	4.25779	-14.5517	9.26e-41	2.76e-39	81.6769
CNOT11	1.04351	6.43408	14.55	9.43e-41	2.81e-39	81.6589
ASF1B	2.02319	4.54056	14.5437	1.01e-40	3e-39	81.5928
CAB39L	-1.402	3.19	-14.5431	1.01e-40	3.01e-39	81.5867
GMFG	-1.64375	5.64514	-14.5368	1.08e-40	3.21e-39	81.5202
DOK2	-2.0711	4.65498	-14.5285	1.18e-40	3.5e-39	81.4342
FIBIN	-2.32217	3.26016	-14.5004	1.59e-40	4.7e-39	81.1402
ADGRL2	-1.83924	2.67576	-14.4971	1.64e-40	4.85e-39	81.1059
KLF9	-1.72439	5.09812	-14.4903	1.77e-40	5.21e-39	81.0341
RNF182	-1.63333	0.959518	-14.4866	1.84e-40	5.41e-39	80.9956
PGM5	-1.97691	2.23937	-14.4795	1.98e-40	5.81e-39	80.9215
ACSS3	-1.53353	1.49233	-14.4792	1.98e-40	5.81e-39	80.9191
MDK	2.6553	8.12906	14.4631	2.35e-40	6.87e-39	80.7508
SEC14L6	-2.46332	2.54814	-14.4478	2.76e-40	8.06e-39	80.5909
MARCKSL1	1.82096	8.36689	14.4435	2.89e-40	8.42e-39	80.546
ACP5	-1.90804	6.8043	-14.4413	2.96e-40	8.61e-39	80.5224
GSTA3	-1.78382	0.81749	-14.4336	3.2e-40	9.31e-39	80.443
JDP2	-1.36356	4.03732	-14.4314	3.28e-40	9.52e-39	80.4197
E2F8	1.86931	2.38387	14.4279	3.4e-40	9.86e-39	80.3831
KIAA0040	-1.278	5.10156	-14.4263	3.46e-40	1e-38	80.3664
RASGRF1	-2.54604	2.11602	-14.4174	3.8e-40	1.1e-38	80.2733
GINS2	1.99078	3.15874	14.4054	4.31e-40	1.24e-38	80.1482
MEX3A	2.62825	3.20688	14.4001	4.55e-40	1.31e-38	80.0935
LRP2BP	-1.47173	1.54271	-14.3796	5.64e-40	1.62e-38	79.8802
SKA3	1.98252	2.61931	14.3715	6.14e-40	1.76e-38	79.7952
RASGEF1B	-1.40585	3.00855	-14.3705	6.21e-40	1.78e-38	79.7847
SGCA	-2.08437	2.55352	-14.3596	6.96e-40	1.99e-38	79.672
H2BC5	2.18482	5.69677	14.3559	7.23e-40	2.07e-38	79.6335
TPRG1	-1.22553	1.25221	-14.3546	7.33e-40	2.09e-38	79.6192
RSPO4	-2.2017	1.67714	-14.3514	7.58e-40	2.16e-38	79.5868
STX1A	2.09173	3.24584	14.3458	8.04e-40	2.29e-38	79.5276
AQP4	-4.23375	4.71682	-14.3457	8.05e-40	2.29e-38	79.5267
FBLN5	-2.12709	4.84483	-14.3403	8.51e-40	2.42e-38	79.4713
PID1	-2.27743	3.79426	-14.336	8.91e-40	2.52e-38	79.4261
ICAM2	-1.36604	2.99113	-14.3318	9.31e-40	2.63e-38	79.3824
GATA6	-2.0635	3.17336	-14.3309	9.4e-40	2.65e-38	79.3728
FRY	-1.53564	2.66418	-14.3275	9.74e-40	2.75e-38	79.3375
BUB1B	2.12141	2.73585	14.3099	1.17e-39	3.3e-38	79.1551
HACD4	-1.51467	3.02641	-14.2997	1.3e-39	3.66e-38	79.0489
TROAP	2.29867	2.82486	14.2968	1.34e-39	3.77e-38	79.0191
TMEM150B	-1.86135	2.72684	-14.2959	1.35e-39	3.8e-38	79.0095
SYN2	-1.07376	0.504994	-14.2764	1.66e-39	4.65e-38	78.8067
HLA-E	-1.47696	9.93492	-14.274	1.7e-39	4.76e-38	78.7824
TK1	2.30825	6.13655	14.2635	1.9e-39	5.3e-38	78.6728
PLEK2	2.13071	4.68949	14.2462	2.28e-39	6.34e-38	78.4936
DIPK2B	-1.51044	2.8501	-14.2405	2.41e-39	6.71e-38	78.4347
ADRA1D	-1.06645	0.615974	-14.2327	2.62e-39	7.26e-38	78.3541
KIF11	2.02091	3.60895	14.2322	2.63e-39	7.29e-38	78.3489
CTNNAL1	-1.48082	5.2549	-14.2157	3.13e-39	8.63e-38	78.1771
MDGA1	-1.31375	1.31585	-14.2104	3.3e-39	9.1e-38	78.1231
TOM1L2	-1.39467	4.37861	-14.2047	3.5e-39	9.65e-38	78.0639
CDC45	2.16452	3.04964	14.1913	4.03e-39	1.11e-37	77.9247
ACOXL	-1.52388	1.98854	-14.1898	4.09e-39	1.12e-37	77.9092
FABP5	-2.10702	3.70339	-14.176	4.72e-39	1.29e-37	77.767
ANXA3	-2.29505	5.0349	-14.1748	4.79e-39	1.31e-37	77.7542
GTSE1	2.02919	2.7675	14.1743	4.81e-39	1.32e-37	77.7488
CDCA3	1.94322	2.51551	14.1716	4.95e-39	1.35e-37	77.7208
GNAQ	-1.26839	5.44583	-14.1542	5.93e-39	1.61e-37	77.5407
OLFML1	-1.68568	3.2782	-14.1337	7.33e-39	1.99e-37	77.3297
SLC2A1	2.76815	5.50281	14.1212	8.35e-39	2.27e-37	77.2002
MTMR10	-1.13416	3.19801	-14.1153	8.88e-39	2.41e-37	77.1394
GIMAP4	-1.66999	5.53839	-14.1084	9.54e-39	2.58e-37	77.068
EEF1AKMT4	1.69776	3.77122	14.1057	9.81e-39	2.65e-37	77.0405
SCN2B	-1.19829	0.857158	-14.0998	1.04e-38	2.82e-37	76.9792
NARF	1.13253	4.79241	14.0997	1.05e-38	2.82e-37	76.9776
STAC	-2.27889	2.4558	-14.0973	1.07e-38	2.88e-37	76.9536
RBMS3	-1.50497	1.92347	-14.0916	1.14e-38	3.05e-37	76.8942
CDC25C	1.7682	1.99093	14.0854	1.21e-38	3.25e-37	76.8308
HMMR	2.03977	3.03927	14.0819	1.26e-38	3.37e-37	76.7949
MYO19	1.32432	3.35613	14.0752	1.35e-38	3.61e-37	76.7252
ARHGEF39	1.33614	1.74452	14.0588	1.6e-38	4.27e-37	76.5566
CALCOCO1	-1.27868	4.87167	-14.0571	1.62e-38	4.34e-37	76.5388
IQCN	-1.84117	1.65731	-14.0547	1.67e-38	4.44e-37	76.5141
MRC1	-2.95994	5.42636	-14.0535	1.69e-38	4.49e-37	76.5015
SPC24	1.85894	2.94891	14.0532	1.69e-38	4.5e-37	76.4983
FZD4	-1.65854	3.75432	-14.0406	1.93e-38	5.12e-37	76.3689
BMPR2	-1.3187	4.88973	-14.0384	1.97e-38	5.23e-37	76.3464
CYBRD1	-2.16676	6.23058	-14.0125	2.58e-38	6.83e-37	76.0791
PDE1B	-1.21293	1.44548	-14.0019	2.88e-38	7.61e-37	75.9704
FOXM1	2.4074	3.64093	13.9789	3.65e-38	9.62e-37	75.7342
CDT1	2.14226	3.78914	13.9779	3.69e-38	9.71e-37	75.724
ARHGAP24	-1.33802	2.41991	-13.9725	3.9e-38	1.03e-36	75.6682
IHH	-2.0683	0.989564	-13.9706	3.98e-38	1.04e-36	75.6492
NDRG4	-1.83342	1.94084	-13.9679	4.09e-38	1.07e-36	75.621
CSF3	-2.95942	1.66041	-13.9666	4.15e-38	1.09e-36	75.6071
STIL	1.59875	2.44038	13.964	4.26e-38	1.11e-36	75.5805
SRPX	-2.13208	3.65025	-13.9546	4.69e-38	1.23e-36	75.4841
JAML	-1.88138	3.27852	-13.9356	5.71e-38	1.49e-36	75.2889
PLA2G1B	-3.66018	3.27509	-13.934	5.81e-38	1.51e-36	75.2723
C11orf80	1.2009	3.93325	13.928	6.17e-38	1.6e-36	75.2115
PSMG3	1.36616	5.82101	13.9262	6.29e-38	1.63e-36	75.1931
TMEM139	-1.88167	1.52822	-13.9122	7.27e-38	1.88e-36	75.0494
ITLN1	-2.94103	1.39787	-13.9098	7.45e-38	1.92e-36	75.0246
CRABP2	4.36899	7.27058	13.9094	7.48e-38	1.93e-36	75.0207
CDCA5	2.2277	3.70576	13.9006	8.19e-38	2.1e-36	74.9302
KLF2	-1.95503	4.7412	-13.8865	9.47e-38	2.43e-36	74.7862
HYAL2	-1.18269	5.54491	-13.8686	1.14e-37	2.92e-36	74.6025
ADAMTSL4	-2.01347	3.36003	-13.8684	1.14e-37	2.92e-36	74.6001
NPM3	1.49342	5.99257	13.8662	1.17e-37	2.98e-36	74.5775
VAMP2	-1.24089	5.69911	-13.8661	1.17e-37	2.98e-36	74.577
NLN	1.19468	3.48505	13.8572	1.28e-37	3.26e-36	74.4858
KIF18B	2.25194	2.7037	13.8569	1.29e-37	3.27e-36	74.4824
ERBB4	-1.34244	0.844964	-13.8545	1.32e-37	3.34e-36	74.4584
FRMD4A	-1.08233	1.81792	-13.8457	1.44e-37	3.66e-36	74.3678
STARD9	-1.30219	1.39682	-13.844	1.47e-37	3.72e-36	74.3508
MKI67	2.33543	3.71572	13.8343	1.62e-37	4.1e-36	74.2517
OTX1	1.68037	1.95281	13.8306	1.69e-37	4.26e-36	74.2135
TIMP3	-2.26093	8.1725	-13.82	1.88e-37	4.74e-36	74.1055
GPC3	-2.94396	4.60304	-13.8109	2.06e-37	5.2e-36	74.0121
DPYSL2	-1.80447	6.07224	-13.8009	2.29e-37	5.76e-36	73.9094
CCT3	1.21423	7.90261	13.7981	2.35e-37	5.92e-36	73.8811
DUOXA1	-2.51544	3.09782	-13.795	2.43e-37	6.1e-36	73.85
NOS1	-1.43169	0.551747	-13.7889	2.59e-37	6.49e-36	73.7871
MTARC2	-1.66564	4.40461	-13.7873	2.63e-37	6.59e-36	73.7707
EXO1	2.05111	2.5247	13.783	2.75e-37	6.87e-36	73.7268
CBX8	1.11196	3.29767	13.7814	2.79e-37	6.97e-36	73.7105
P3H4	1.73215	4.81444	13.7378	4.37e-37	1.08e-35	73.2655
CCNA2	2.18693	3.81544	13.7205	5.22e-37	1.29e-35	73.0901
LPL	-3.09097	4.73048	-13.7172	5.4e-37	1.33e-35	73.0565
SLC46A2	-2.59471	2.23818	-13.6988	6.52e-37	1.61e-35	72.869
OGN	-2.4903	2.13296	-13.6963	6.69e-37	1.65e-35	72.8433
TPPP3	-2.97266	5.17351	-13.6928	6.93e-37	1.71e-35	72.8075
A2M	-2.20948	8.8333	-13.6894	7.18e-37	1.76e-35	72.7727
NKD1	-1.76007	1.58188	-13.6877	7.31e-37	1.79e-35	72.7553
CENPA	2.24897	2.87212	13.6871	7.35e-37	1.8e-35	72.7494
SAMD10	1.43131	3.89841	13.6852	7.49e-37	1.83e-35	72.73
NRG1	-1.05442	0.699127	-13.6822	7.73e-37	1.89e-35	72.6997
POLR2H	1.06221	5.61507	13.6797	7.93e-37	1.93e-35	72.6742
NDC80	2.06881	2.99704	13.6734	8.46e-37	2.06e-35	72.6102
CCRL2	-1.67736	3.13639	-13.6734	8.46e-37	2.06e-35	72.6101
SLC35F2	1.65596	5.011	13.6724	8.54e-37	2.08e-35	72.6002
SOX5	-1.03708	0.844794	-13.6709	8.67e-37	2.11e-35	72.5851
GPR17	-1.23042	0.775005	-13.669	8.84e-37	2.14e-35	72.5657
SLC11A1	-1.89292	3.60923	-13.6613	9.57e-37	2.32e-35	72.4869
LMOD1	-1.889	3.46502	-13.6534	1.04e-36	2.51e-35	72.4065
RBMS2	-1.29295	4.72277	-13.6525	1.05e-36	2.53e-35	72.3977
PRICKLE2	-1.22252	2.00037	-13.6481	1.09e-36	2.64e-35	72.3534
PKMYT1	1.84206	2.48091	13.6445	1.14e-36	2.74e-35	72.316
GAB1	-1.37681	3.13182	-13.6385	1.21e-36	2.91e-35	72.2552
GJB2	3.16267	4.29286	13.6354	1.25e-36	3e-35	72.2242
MT1M	-2.92528	3.69819	-13.6346	1.26e-36	3.02e-35	72.2156
ITPRID2	-1.29733	5.31326	-13.6304	1.31e-36	3.15e-35	72.1731
SHC3	-1.75589	1.90729	-13.6249	1.39e-36	3.32e-35	72.1173
NEGR1	-1.30863	1.12747	-13.6247	1.39e-36	3.33e-35	72.1149
CFL2	-1.47713	4.27269	-13.6228	1.42e-36	3.39e-35	72.0961
AARD	-2.10303	1.52291	-13.616	1.52e-36	3.63e-35	72.0266
DIXDC1	-1.22489	2.86921	-13.6137	1.56e-36	3.71e-35	72.0033
CHRDL1	-2.90504	3.63182	-13.6019	1.76e-36	4.18e-35	71.8839
DEPDC1B	1.95641	2.34527	13.5875	2.03e-36	4.84e-35	71.7376
RASAL1	2.12877	2.39518	13.5867	2.05e-36	4.87e-35	71.7294
RASL12	-1.62325	3.91568	-13.577	2.26e-36	5.37e-35	71.6312
GIPC2	-1.7919	1.62393	-13.5756	2.3e-36	5.44e-35	71.6168
KLF13	-1.44586	5.0826	-13.5743	2.33e-36	5.5e-35	71.6039
RHBDL2	1.85042	3.03779	13.5661	2.53e-36	5.97e-35	71.5213
ANKRD33B	-1.32568	1.16765	-13.5577	2.76e-36	6.5e-35	71.4355
MCM4	1.82152	4.97327	13.5503	2.97e-36	6.99e-35	71.3611
GATA2	-1.80644	3.29966	-13.5479	3.04e-36	7.16e-35	71.3367
RTN1	-1.627	2.1631	-13.5404	3.28e-36	7.71e-35	71.2612
CACNA2D2	-3.40732	3.93925	-13.5388	3.34e-36	7.83e-35	71.2447
AHNAK	-2.2424	6.62887	-13.5376	3.38e-36	7.92e-35	71.2327
PTPRO	-1.00628	1.11855	-13.5241	3.88e-36	9.07e-35	71.096
TMEM182	1.0503	2.31692	13.5237	3.89e-36	9.09e-35	71.092
CLEC12A	-1.94268	2.29646	-13.521	4.01e-36	9.34e-35	71.0641
ABCA9	-1.13468	1.06091	-13.5206	4.02e-36	9.36e-35	71.0609
UQCC2	1.2492	4.59782	13.5141	4.29e-36	9.99e-35	70.9949
SCARA5	-2.55937	1.85347	-13.5111	4.43e-36	1.03e-34	70.9641
PCDH17	-1.64199	3.10035	-13.5012	4.9e-36	1.14e-34	70.864
ALOX5	-2.051	5.36942	-13.4992	5e-36	1.16e-34	70.8439
RBP4	-2.94563	3.14557	-13.4951	5.21e-36	1.2e-34	70.8025
CD300LF	-1.97823	3.7122	-13.4942	5.26e-36	1.21e-34	70.7936
CSRP1	-1.02161	6.34196	-13.487	5.66e-36	1.31e-34	70.7207
ID4	-2.38287	4.02993	-13.4762	6.32e-36	1.46e-34	70.6114
ALOX5AP	-2.26303	6.09973	-13.464	7.15e-36	1.65e-34	70.4882
MS4A15	-4.08408	3.16932	-13.4595	7.48e-36	1.72e-34	70.4435
SCN1A	-1.04209	0.618095	-13.4057	1.29e-35	2.96e-34	69.9008
TNFRSF21	1.76609	7.11939	13.4008	1.36e-35	3.11e-34	69.8518
XRCC2	1.69413	2.09838	13.3958	1.43e-35	3.27e-34	69.8009
SECISBP2L	-1.56984	4.83479	-13.3845	1.6e-35	3.65e-34	69.6871
ARHGEF6	-1.58214	4.01521	-13.382	1.64e-35	3.74e-34	69.662
REEP1	-1.64894	1.36884	-13.3696	1.86e-35	4.24e-34	69.5378
NECTIN4	2.05528	5.54131	13.3592	2.07e-35	4.7e-34	69.4329
C20orf194	-1.25451	3.29393	-13.3467	2.35e-35	5.33e-34	69.3072
PCLAF	1.60373	2.32364	13.3434	2.43e-35	5.5e-34	69.2742
MYO7A	1.35326	2.42969	13.3409	2.49e-35	5.64e-34	69.2489
PRKCH	-1.07883	3.62423	-13.3375	2.58e-35	5.83e-34	69.2146
ARHGAP44	-1.75852	2.81042	-13.3353	2.63e-35	5.95e-34	69.1929
TONSL	1.56837	3.14894	13.3276	2.85e-35	6.43e-34	69.1149
KCNJ5	-1.92778	2.14904	-13.3244	2.94e-35	6.63e-34	69.0828
MVB12B	-1.52633	3.48499	-13.3174	3.15e-35	7.1e-34	69.0134
GNG11	-2.03989	5.05051	-13.3154	3.22e-35	7.24e-34	68.9924
ASPM	1.99158	2.37379	13.3138	3.27e-35	7.34e-34	68.9767
IL7R	-2.27478	4.7346	-13.3125	3.32e-35	7.44e-34	68.9633
NTNG1	-1.44153	0.77664	-13.3104	3.39e-35	7.58e-34	68.9429
CYRIA	-1.5342	3.41302	-13.3054	3.56e-35	7.97e-34	68.8922
CDCA7	2.33533	3.80678	13.3018	3.69e-35	8.25e-34	68.8565
UBL3	-1.25055	5.78386	-13.2966	3.89e-35	8.69e-34	68.8037
AURKA	2.03111	4.1891	13.2935	4.02e-35	8.94e-34	68.773
SLC7A7	-1.61954	4.50594	-13.2899	4.17e-35	9.27e-34	68.7366
SORBS1	-1.62256	3.01053	-13.2844	4.4e-35	9.78e-34	68.6815
NCF2	-1.87491	5.48975	-13.266	5.3e-35	1.18e-33	68.497
KIFC1	2.15112	4.20781	13.2613	5.56e-35	1.23e-33	68.4503
ZBTB16	-2.65669	2.22613	-13.2579	5.75e-35	1.27e-33	68.4161
DBNDD1	1.64156	4.26936	13.2429	6.69e-35	1.48e-33	68.2665
PTGER4	-1.78979	3.72463	-13.2384	7e-35	1.55e-33	68.2209
NTN4	-1.95763	5.18063	-13.2297	7.64e-35	1.69e-33	68.1338
LATS2	-1.19601	4.10966	-13.2241	8.09e-35	1.78e-33	68.0778
PCDH9	-1.05656	0.573913	-13.2232	8.16e-35	1.8e-33	68.069
JUND	-1.43393	7.78656	-13.2227	8.2e-35	1.8e-33	68.064
PRKCQ	-1.63868	2.47199	-13.2211	8.33e-35	1.83e-33	68.0477
CENPU	1.7696	3.52542	13.2186	8.54e-35	1.87e-33	68.0231
TNFSF12	-1.28249	4.9482	-13.2124	9.1e-35	1.99e-33	67.9607
TLR8	-1.89523	2.57167	-13.2039	9.91e-35	2.16e-33	67.8756
PRKG1	-1.2876	1.74363	-13.2013	1.02e-34	2.22e-33	67.8504
IL5RA	-1.40748	0.88974	-13.1966	1.07e-34	2.32e-33	67.8032
PPBP	-2.3727	1.48311	-13.1957	1.08e-34	2.34e-33	67.7938
MYOCD	-1.11753	0.76596	-13.1946	1.09e-34	2.36e-33	67.7837
GPR4	-1.3809	2.97394	-13.1917	1.12e-34	2.43e-33	67.7537
NRN1	-2.04345	3.32774	-13.1793	1.27e-34	2.75e-33	67.6307
BMX	-1.57126	1.15702	-13.1714	1.37e-34	2.98e-33	67.5516
UBASH3B	-1.61293	2.52549	-13.168	1.42e-34	3.07e-33	67.5178
C1QTNF6	1.71353	3.36535	13.1643	1.48e-34	3.19e-33	67.4803
DCAF13	1.12068	4.16629	13.1566	1.59e-34	3.44e-33	67.4039
TRAF4	1.21344	5.83346	13.1443	1.8e-34	3.88e-33	67.2811
CCNE1	2.07468	2.99604	13.1405	1.87e-34	4.03e-33	67.2429
SERINC2	1.7915	7.15236	13.1386	1.91e-34	4.1e-33	67.2242
SH2D1B	-1.12606	0.894462	-13.1362	1.96e-34	4.2e-33	67.1999
RADX	-1.36806	1.34854	-13.1354	1.97e-34	4.23e-33	67.1928
GGTA1	-1.4175	2.6499	-13.1312	2.06e-34	4.4e-33	67.1507
CHAF1B	1.39355	2.89333	13.1273	2.14e-34	4.58e-33	67.1115
HYAL1	-2.54654	3.92381	-13.116	2.39e-34	5.12e-33	66.9991
CDKN3	2.10131	3.4456	13.1129	2.47e-34	5.28e-33	66.9681
EPCAM	1.45647	9.0066	13.1111	2.52e-34	5.37e-33	66.9499
PBK	2.26203	3.1971	13.1038	2.7e-34	5.76e-33	66.8781
FGFR2	-2.15581	3.31279	-13.102	2.75e-34	5.86e-33	66.8599
PDCD2L	1.18739	3.24083	13.0884	3.16e-34	6.72e-33	66.7238
CYP4B1	-4.14914	5.31725	-13.086	3.23e-34	6.87e-33	66.7005
FAM167B	-1.36052	3.94041	-13.0825	3.35e-34	7.11e-33	66.6654
JPT1	1.47034	6.89203	13.0814	3.39e-34	7.17e-33	66.6551
PHKA1	1.32329	3.56706	13.0746	3.62e-34	7.67e-33	66.5872
F10	-1.64472	2.181	-13.0743	3.64e-34	7.69e-33	66.5841
PTTG1	1.88464	4.79653	13.0739	3.65e-34	7.71e-33	66.5805
GNL3	1.0146	6.24237	13.0734	3.67e-34	7.74e-33	66.5751
MS4A2	-1.90056	1.94197	-13.0685	3.85e-34	8.12e-33	66.527
ARRB1	-1.50951	4.36205	-13.0661	3.95e-34	8.31e-33	66.5028
PILRA	-1.68494	4.16627	-13.0638	4.04e-34	8.49e-33	66.4795
C1orf198	-1.28441	6.16757	-13.0621	4.11e-34	8.63e-33	66.4627
ERCC6L	1.52449	1.81516	13.0546	4.43e-34	9.29e-33	66.388
MAPK4	-1.96744	1.02805	-13.053	4.5e-34	9.43e-33	66.372
SELPLG	-1.66987	5.40945	-13.0517	4.56e-34	9.54e-33	66.3596
PLSCR4	-1.56041	4.19554	-13.0497	4.65e-34	9.73e-33	66.3394
UNC5CL	2.19232	3.44629	13.0447	4.89e-34	1.02e-32	66.2899
RRAS	-1.48919	7.11406	-13.0438	4.93e-34	1.03e-32	66.2808
CYP27A1	-1.98817	6.0155	-13.0411	5.07e-34	1.06e-32	66.254
FAM241A	-1.08171	2.54124	-13.0288	5.73e-34	1.19e-32	66.1322
TRAP1	1.02426	4.7061	13.0285	5.74e-34	1.19e-32	66.1296
HROB	1.71043	2.60155	13.028	5.78e-34	1.2e-32	66.1243
SOBP	-1.29476	1.45198	-13.0264	5.87e-34	1.22e-32	66.1084
CTIF	-1.17814	3.66991	-13.016	6.51e-34	1.35e-32	66.005
ZEB1	-1.40487	3.24672	-13.0157	6.53e-34	1.35e-32	66.0019
SLC25A25	-1.4051	3.97632	-13.0135	6.68e-34	1.38e-32	65.9798
ERO1A	1.68604	6.0615	13.0047	7.29e-34	1.5e-32	65.8932
NCAPH	1.84314	2.59471	13.0045	7.3e-34	1.51e-32	65.8912
P2RY14	-1.39977	2.32097	-12.9932	8.18e-34	1.69e-32	65.7786
SCIMP	-1.55104	2.48028	-12.986	8.78e-34	1.81e-32	65.708
ZEB2	-1.44642	2.71881	-12.9831	9.04e-34	1.86e-32	65.6795
TOX2	-1.63921	2.92016	-12.979	9.42e-34	1.93e-32	65.638
ARHGAP18	-1.31385	5.21557	-12.9776	9.55e-34	1.96e-32	65.6245
HS6ST2	2.80109	4.005	12.9771	9.59e-34	1.96e-32	65.62
PROS1	-1.797	4.72895	-12.9665	1.07e-33	2.18e-32	65.5148
BZW2	1.18583	5.8837	12.9665	1.07e-33	2.18e-32	65.5143
ARHGEF16	1.47534	4.35487	12.9658	1.07e-33	2.19e-32	65.5079
TRAIP	1.21337	2.40109	12.9595	1.14e-33	2.33e-32	65.4455
ZNF106	-1.37658	4.22886	-12.9585	1.16e-33	2.35e-32	65.4356
SOCS2	-2.00596	3.35603	-12.953	1.22e-33	2.48e-32	65.381
SIDT2	-1.07411	4.52678	-12.9476	1.29e-33	2.61e-32	65.3278
P3H2	-2.68861	3.72711	-12.9195	1.7e-33	3.44e-32	65.0499
CARD16	-1.46657	3.91929	-12.9156	1.77e-33	3.58e-32	65.0115
NEXN	-1.57151	3.18633	-12.9132	1.81e-33	3.66e-32	64.9874
CCNF	1.38334	2.92942	12.9062	1.94e-33	3.91e-32	64.9188
SOX4	1.57409	7.02296	12.8946	2.18e-33	4.39e-32	64.8033
E2F3	1.21909	4.11187	12.8881	2.33e-33	4.67e-32	64.7393
CD33	-1.31487	2.02233	-12.8615	3.03e-33	6.07e-32	64.4776
NEDD9	-1.92686	5.26002	-12.8609	3.05e-33	6.1e-32	64.4709
KIF14	1.76692	1.99539	12.848	3.47e-33	6.91e-32	64.3438
SHROOM4	-1.80958	3.06379	-12.8428	3.65e-33	7.27e-32	64.2926
EPHA10	1.83164	2.09595	12.8422	3.67e-33	7.31e-32	64.287
FAM167A	-2.28214	2.85564	-12.8406	3.73e-33	7.42e-32	64.2712
NEBL	-1.8141	3.5452	-12.8386	3.8e-33	7.55e-32	64.2519
ATP1B2	-1.33119	1.58887	-12.8296	4.16e-33	8.26e-32	64.1625
EFEMP1	-2.06233	6.31372	-12.825	4.35e-33	8.63e-32	64.1177
B4GALT2	1.08733	5.10223	12.8242	4.39e-33	8.69e-32	64.1101
ST6GALNAC2	-1.69799	2.03669	-12.8233	4.43e-33	8.76e-32	64.1008
HOXA5	-1.59521	3.37479	-12.8213	4.52e-33	8.93e-32	64.0811
KNTC1	1.49412	2.93336	12.8102	5.04e-33	9.95e-32	63.9716
FAM111B	1.88528	2.9755	12.8081	5.15e-33	1.02e-31	63.9511
POLE2	1.52021	2.62504	12.8044	5.34e-33	1.05e-31	63.9154
LIMCH1	-1.85564	5.42182	-12.795	5.86e-33	1.15e-31	63.8225
CA3	-1.92125	1.88151	-12.7941	5.91e-33	1.16e-31	63.8134
SMTNL2	-1.42556	1.31825	-12.7851	6.46e-33	1.27e-31	63.7255
ACKR1	-2.68147	3.92453	-12.7845	6.5e-33	1.27e-31	63.7193
DEFA3	-1.04025	0.310994	-12.7834	6.57e-33	1.29e-31	63.7087
TM6SF1	-1.27744	1.96359	-12.772	7.36e-33	1.44e-31	63.5962
TSPAN7	-2.58567	3.84589	-12.768	7.65e-33	1.49e-31	63.5574
NCAPG	1.98175	2.7103	12.7669	7.74e-33	1.51e-31	63.5463
KHDRBS2	-1.99774	1.58841	-12.7572	8.52e-33	1.66e-31	63.4511
SLC25A39	1.11809	7.18253	12.7498	9.16e-33	1.78e-31	63.3783
PLEKHO2	-1.23809	5.35877	-12.7442	9.68e-33	1.88e-31	63.3238
FRMD4B	-1.16112	3.36984	-12.7335	1.08e-32	2.09e-31	63.2186
COL1A1	2.74416	9.09304	12.7307	1.11e-32	2.14e-31	63.1917
SLC27A3	-1.42405	4.36487	-12.7237	1.19e-32	2.29e-31	63.1228
PDLIM1	-1.1315	7.72258	-12.711	1.34e-32	2.59e-31	62.9985
FCGR3B	-1.90336	1.71946	-12.707	1.4e-32	2.69e-31	62.9593
CKAP2L	1.75451	2.26698	12.7051	1.42e-32	2.74e-31	62.9405
S100A12	-2.05105	1.85377	-12.7041	1.44e-32	2.76e-31	62.9311
LRRC18	-1.58098	0.941219	-12.7001	1.5e-32	2.87e-31	62.8918
ORC1	1.75495	2.63682	12.6975	1.53e-32	2.94e-31	62.8666
EXOC3L1	-1.12163	2.70643	-12.6954	1.57e-32	3e-31	62.8461
CCDC167	1.27686	6.27115	12.6839	1.75e-32	3.35e-31	62.7329
TNS2	-1.52258	4.92953	-12.6829	1.77e-32	3.38e-31	62.7234
RCCD1	1.03577	3.07298	12.6821	1.79e-32	3.4e-31	62.7152
GPRIN1	1.73123	2.64229	12.6818	1.79e-32	3.41e-31	62.7123
RNF122	-1.15111	4.20281	-12.6776	1.87e-32	3.55e-31	62.671
MRM1	1.10452	3.89305	12.6655	2.1e-32	4e-31	62.5529
ARAP3	-1.26602	3.53272	-12.6583	2.26e-32	4.29e-31	62.4827
PCYOX1	-1.19556	6.18639	-12.6511	2.42e-32	4.6e-31	62.4124
SERPING1	-1.59774	7.05014	-12.6475	2.51e-32	4.75e-31	62.3769
KHDC4	1.32736	4.8263	12.6439	2.6e-32	4.92e-31	62.3424
GJA5	-1.71146	4.2411	-12.6395	2.72e-32	5.13e-31	62.2986
CHEK1	1.75881	2.99867	12.6357	2.82e-32	5.32e-31	62.2614
TTK	1.90896	2.51629	12.6324	2.91e-32	5.49e-31	62.2298
CYGB	-1.28867	3.80109	-12.6227	3.2e-32	6.03e-31	62.1351
AGMAT	1.38222	1.93464	12.6204	3.28e-32	6.16e-31	62.1129
ZFYVE9	-1.26034	3.20802	-12.6175	3.37e-32	6.33e-31	62.0845
HMGA1	1.91399	7.95309	12.6122	3.55e-32	6.67e-31	62.0323
PRICKLE1	-1.12804	1.42694	-12.6068	3.74e-32	7.01e-31	61.9802
TMEM220	-1.36304	2.33539	-12.6068	3.74e-32	7.01e-31	61.9801
PPP4R4	-1.2805	0.993224	-12.5948	4.21e-32	7.88e-31	61.8629
PTPRM	-1.58277	4.10462	-12.5896	4.43e-32	8.28e-31	61.8127
GJA4	-1.48389	4.05372	-12.5878	4.51e-32	8.42e-31	61.795
C1orf112	1.12928	2.28107	12.5869	4.56e-32	8.49e-31	61.7854
SIX4	1.5971	2.94819	12.5741	5.16e-32	9.61e-31	61.6609
ROBO2	-1.39796	1.18761	-12.5709	5.33e-32	9.9e-31	61.6298
SMAD9	-1.68675	2.35042	-12.5673	5.52e-32	1.02e-30	61.5954
DEPDC1	1.84376	2.11142	12.5588	6e-32	1.11e-30	61.5126
MMP19	-1.80887	3.58163	-12.5538	6.3e-32	1.17e-30	61.4636
ACACB	-1.17177	2.06945	-12.5521	6.4e-32	1.18e-30	61.4475
ABCG1	-1.54329	4.45162	-12.5496	6.56e-32	1.21e-30	61.4229
TBX5	-1.49316	2.79403	-12.5463	6.78e-32	1.25e-30	61.3911
INKA1	-1.28131	2.5986	-12.5447	6.88e-32	1.27e-30	61.3756
LEFTY2	-1.39457	0.995415	-12.533	7.72e-32	1.42e-30	61.2616
DNA2	1.42633	2.46079	12.5316	7.83e-32	1.44e-30	61.2478
MYOZ1	-1.94774	2.24298	-12.5251	8.34e-32	1.53e-30	61.1843
MCM10	1.82306	2.18023	12.5243	8.41e-32	1.54e-30	61.1766
PTGIR	-1.20727	2.48322	-12.5226	8.55e-32	1.57e-30	61.1607
EPB41L2	-1.51315	3.85386	-12.5224	8.56e-32	1.57e-30	61.1585
HSPE1	1.16201	4.99756	12.5086	9.8e-32	1.79e-30	61.0244
COLEC12	-2.12794	4.04548	-12.5064	1e-31	1.83e-30	61.0026
PAPSS2	-1.7627	5.93688	-12.5036	1.03e-31	1.88e-30	60.9756
STOM	-1.42075	8.05379	-12.496	1.11e-31	2.02e-30	60.9016
LRRK2	-2.94231	3.98661	-12.4932	1.14e-31	2.07e-30	60.8745
LILRB3	-1.36511	3.22146	-12.4781	1.32e-31	2.4e-30	60.7285
RPP40	1.20399	3.03281	12.4761	1.35e-31	2.45e-30	60.7092
SELENOP	-1.91328	4.64562	-12.4759	1.35e-31	2.45e-30	60.7069
MOCS1	-1.38547	3.14161	-12.475	1.36e-31	2.47e-30	60.6988
GALNT7	1.40468	4.74468	12.4736	1.38e-31	2.5e-30	60.6843
SLC39A11	1.16418	5.1803	12.4728	1.39e-31	2.52e-30	60.6774
DCSTAMP	-1.6431	1.56029	-12.4721	1.4e-31	2.53e-30	60.6703
NDRG2	-1.7355	4.01299	-12.4686	1.45e-31	2.62e-30	60.6365
KAT2B	-1.24855	3.89515	-12.4652	1.5e-31	2.7e-30	60.6033
RIPOR1	-1.24179	4.32279	-12.4574	1.62e-31	2.91e-30	60.5281
PF4	-1.54945	0.996704	-12.4537	1.68e-31	3.02e-30	60.4916
KPNA2	1.66794	5.19309	12.4518	1.71e-31	3.07e-30	60.4731
ARL13B	-1.04454	3.44341	-12.4494	1.75e-31	3.14e-30	60.4498
SPATS2	1.00384	3.94162	12.4491	1.75e-31	3.15e-30	60.447
BUB1	1.86314	3.2305	12.4473	1.78e-31	3.2e-30	60.4294
CFAP161	-1.40808	0.873404	-12.4452	1.82e-31	3.26e-30	60.4097
DONSON	1.1738	3.51075	12.4439	1.84e-31	3.3e-30	60.3969
NOSTRIN	-1.62632	3.07496	-12.4378	1.96e-31	3.5e-30	60.3377
GALNT18	-1.58552	4.6865	-12.4366	1.98e-31	3.54e-30	60.3259
HSD17B4	-1.05675	5.17788	-12.4337	2.04e-31	3.63e-30	60.2986
SLC16A11	-1.73286	1.99798	-12.4323	2.07e-31	3.68e-30	60.2845
HK3	-2.01931	3.78664	-12.4242	2.23e-31	3.98e-30	60.2066
NPNT	-2.36934	5.0002	-12.4227	2.27e-31	4.03e-30	60.1921
SPI1	-1.77972	5.91392	-12.4124	2.51e-31	4.45e-30	60.0919
LSAMP	-1.50196	2.20476	-12.4098	2.57e-31	4.56e-30	60.0667
FPR1	-1.97628	3.94866	-12.3878	3.19e-31	5.63e-30	59.8541
SNRPE	1.01067	6.16881	12.3857	3.25e-31	5.73e-30	59.8346
CEACAM21	-1.52325	2.36707	-12.3853	3.26e-31	5.75e-30	59.83
LMO7	-1.58243	5.6477	-12.3828	3.34e-31	5.89e-30	59.8063
CDCA2	1.66186	2.21224	12.3792	3.46e-31	6.09e-30	59.7717
BTK	-1.50944	3.36308	-12.3706	3.76e-31	6.61e-30	59.6882
N4BP2L1	-1.26571	2.97982	-12.3687	3.84e-31	6.73e-30	59.6698
PHLDA2	2.19456	6.06337	12.3666	3.91e-31	6.86e-30	59.6497
ECT2	1.72193	4.54999	12.364	4.01e-31	7.03e-30	59.6245
PCYT1B	-1.08732	0.653524	-12.3561	4.33e-31	7.58e-30	59.5489
SHMT2	1.25863	5.90063	12.354	4.42e-31	7.73e-30	59.5287
FOSB	-3.6718	4.60274	-12.3489	4.65e-31	8.12e-30	59.4794
CCDC50	-1.09925	4.28997	-12.3478	4.69e-31	8.2e-30	59.469
CLIC3	-2.57222	5.48766	-12.346	4.78e-31	8.34e-30	59.4513
LMNB1	1.6226	5.01368	12.3458	4.79e-31	8.34e-30	59.4497
CD83	-1.65481	5.1918	-12.3447	4.84e-31	8.42e-30	59.4392
TLCD1	1.49432	5.22255	12.3427	4.93e-31	8.57e-30	59.4196
KIF22	1.13797	4.5342	12.3322	5.47e-31	9.48e-30	59.3179
TLL1	-1.09433	1.09973	-12.3299	5.59e-31	9.68e-30	59.2961
SUSD2	-3.4421	5.84069	-12.3268	5.76e-31	9.98e-30	59.2658
CRIM1	-1.52988	5.12849	-12.3128	6.59e-31	1.14e-29	59.1318
CRY2	-1.26385	4.66913	-12.3099	6.78e-31	1.17e-29	59.1036
MAD2L1	1.74151	3.11804	12.3062	7.03e-31	1.21e-29	59.0674
PIMREG	1.86819	2.4885	12.3045	7.15e-31	1.23e-29	59.0513
GAPDH	1.44998	10.3547	12.2963	7.74e-31	1.33e-29	58.9724
MRAS	-1.14238	3.61949	-12.2953	7.81e-31	1.34e-29	58.963
CLEC4E	-1.74632	2.38449	-12.2873	8.45e-31	1.45e-29	58.886
PCDHGC3	-1.62141	3.09872	-12.2859	8.56e-31	1.47e-29	58.8727
PLLP	-1.79685	3.45867	-12.2835	8.76e-31	1.5e-29	58.85
METTL1	1.16312	4.73786	12.2833	8.78e-31	1.5e-29	58.8476
PKIG	-1.3745	5.52847	-12.2766	9.37e-31	1.6e-29	58.7833
ADGRE5	-1.4401	5.90264	-12.2743	9.57e-31	1.64e-29	58.7615
PRG4	-2.57466	1.98778	-12.2739	9.62e-31	1.64e-29	58.757
DKC1	1.00591	5.73344	12.2708	9.91e-31	1.69e-29	58.7274
EIF4E3	-1.12259	3.10653	-12.2699	9.99e-31	1.7e-29	58.7193
TFB2M	1.0434	5.29963	12.2624	1.07e-30	1.83e-29	58.6469
AKAP7	-1.0528	2.26575	-12.2598	1.1e-30	1.87e-29	58.6219
FRMD5	1.60898	1.81004	12.2433	1.29e-30	2.19e-29	58.4639
MYO7B	-1.25098	0.833737	-12.2339	1.41e-30	2.39e-29	58.3737
DUS1L	1.08178	5.72858	12.2201	1.62e-30	2.73e-29	58.2413
CA2	-2.37119	4.68025	-12.2131	1.73e-30	2.92e-29	58.1744
CD302	-1.59232	2.66218	-12.211	1.77e-30	2.98e-29	58.154
COL6A5	-1.40434	1.31145	-12.2086	1.81e-30	3.05e-29	58.1307
FANCA	1.25586	2.27254	12.1965	2.03e-30	3.42e-29	58.0153
C1orf115	-1.87127	4.60286	-12.1905	2.15e-30	3.62e-29	57.9577
SOX18	-1.47127	3.59072	-12.1818	2.34e-30	3.93e-29	57.8743
SORBS3	-1.25515	5.04732	-12.1798	2.38e-30	4e-29	57.8555
PHOSPHO1	-1.04612	1.0613	-12.1682	2.67e-30	4.46e-29	57.7444
PROM2	2.11501	4.98081	12.1664	2.71e-30	4.54e-29	57.727
P2RY6	2.14091	3.56056	12.1562	2.99e-30	5e-29	57.6297
PTPRH	2.5771	2.6819	12.1508	3.15e-30	5.26e-29	57.5782
FBP1	-1.79604	6.47664	-12.146	3.3e-30	5.51e-29	57.5322
SKA1	1.76106	2.39673	12.1449	3.34e-30	5.56e-29	57.5217
FCN1	-1.76923	2.49855	-12.1402	3.49e-30	5.81e-29	57.4764
TIMELESS	1.41254	4.44114	12.1385	3.55e-30	5.91e-29	57.4603
NPR3	-1.78525	2.76666	-12.1379	3.57e-30	5.93e-29	57.4549
HPCAL1	-1.18724	5.41861	-12.1327	3.75e-30	6.23e-29	57.4051
CST5	-1.7025	1.25168	-12.1327	3.75e-30	6.23e-29	57.4048
SGO1	1.37026	1.59706	12.1241	4.08e-30	6.76e-29	57.3226
SFTPD	-3.6884	6.01463	-12.1229	4.12e-30	6.83e-29	57.3117
CDK1	1.87597	4.29847	12.1198	4.25e-30	7.03e-29	57.2822
HELLS	1.41511	2.24161	12.1184	4.3e-30	7.12e-29	57.2692
MFSD2A	-2.01593	4.95153	-12.1163	4.39e-30	7.26e-29	57.2489
BST1	-1.32941	2.86606	-12.1154	4.43e-30	7.31e-29	57.2402
GJC2	-1.26654	1.79615	-12.1103	4.65e-30	7.67e-29	57.1919
SH3BGRL	-1.0708	7.31384	-12.1095	4.69e-30	7.73e-29	57.1841
PLA2G5	-1.01319	1.58176	-12.1066	4.82e-30	7.94e-29	57.1564
SHANK3	-1.30446	3.30759	-12.1054	4.88e-30	8.03e-29	57.1444
PMP22	-1.31877	4.3819	-12.0955	5.37e-30	8.82e-29	57.05
SH3BP5	-1.368	2.78837	-12.089	5.71e-30	9.37e-29	56.989
FLRT3	-2.3212	4.49984	-12.0879	5.77e-30	9.46e-29	56.9784
RAB26	1.68136	1.99656	12.0836	6.01e-30	9.86e-29	56.9374
PRDX4	1.23856	7.44563	12.079	6.28e-30	1.03e-28	56.8937
SEPTIN10	-1.10499	5.48263	-12.0738	6.61e-30	1.08e-28	56.8439
APOBR	-1.67088	3.84623	-12.0719	6.73e-30	1.1e-28	56.8261
APOLD1	-1.61502	3.27895	-12.0697	6.87e-30	1.12e-28	56.805
HSH2D	1.24768	4.23236	12.0637	7.28e-30	1.19e-28	56.7477
MITF	-1.27633	2.89851	-12.0569	7.77e-30	1.27e-28	56.6827
PC	1.42237	3.88789	12.0427	8.9e-30	1.45e-28	56.5478
SPC25	1.603	2.81404	12.0376	9.35e-30	1.52e-28	56.4995
PPARGC1B	-1.00683	1.27685	-12.0352	9.56e-30	1.55e-28	56.4765
ADGRL4	-1.22675	3.35864	-12.0243	1.06e-29	1.72e-28	56.3734
SHCBP1	1.4662	2.45582	12.024	1.06e-29	1.73e-28	56.3706
SLC52A2	1.26127	5.6616	12.0228	1.08e-29	1.75e-28	56.3592
RBBP8NL	1.44	2.51084	12.014	1.17e-29	1.9e-28	56.2755
C11orf96	-1.93668	4.82705	-12.0125	1.19e-29	1.92e-28	56.2612
RAD54L	1.4893	1.82326	12.0117	1.2e-29	1.94e-28	56.2533
SLC7A5	2.15036	5.64912	12.0092	1.23e-29	1.98e-28	56.2298
RAD51	1.47058	2.65564	12.0059	1.27e-29	2.04e-28	56.1986
PAQR5	-1.63814	2.40505	-12.0026	1.31e-29	2.11e-28	56.1671
RFLNB	-1.30021	4.06612	-11.9978	1.37e-29	2.2e-28	56.1222
KIF15	1.523	2.20516	11.9958	1.39e-29	2.24e-28	56.1031
FEN1	1.35593	5.27822	11.9953	1.4e-29	2.25e-28	56.0982
NR4A3	-2.15962	2.58588	-11.9915	1.45e-29	2.33e-28	56.0618
ESPL1	1.71141	2.22478	11.9905	1.47e-29	2.35e-28	56.0522
PDGFB	-1.46828	4.2598	-11.99	1.47e-29	2.36e-28	56.0479
BOP1	1.42234	5.38592	11.973	1.73e-29	2.78e-28	55.8865
ABCA3	-2.81972	6.20231	-11.9724	1.74e-29	2.79e-28	55.8806
ZNF385B	-2.62265	2.57846	-11.9708	1.77e-29	2.83e-28	55.8661
SCAI	-1.01528	2.13792	-11.9649	1.87e-29	2.99e-28	55.8098
UTRN	-1.50398	4.67066	-11.9644	1.88e-29	3e-28	55.805
MAOB	-1.93329	4.20715	-11.9629	1.91e-29	3.04e-28	55.7908
GREM1	2.54496	2.74848	11.9594	1.97e-29	3.14e-28	55.758
APBB1	-1.48459	3.78533	-11.947	2.22e-29	3.53e-28	55.6405
MAP3K3	-1.07163	4.36144	-11.9456	2.25e-29	3.57e-28	55.6273
SLC12A4	-1.08719	4.33172	-11.945	2.26e-29	3.59e-28	55.6218
RHEX	-1.61256	1.74384	-11.9445	2.27e-29	3.61e-28	55.6167
JPT2	1.02777	6.57674	11.944	2.28e-29	3.62e-28	55.6124
HSPD1	1.12562	6.94496	11.9424	2.32e-29	3.67e-28	55.597
SYNJ2	1.16337	2.92148	11.9334	2.53e-29	3.99e-28	55.5119
TRIP13	2.01277	3.80617	11.9324	2.55e-29	4.03e-28	55.5026
LIFR	-1.83666	4.09827	-11.9307	2.59e-29	4.09e-28	55.4863
NTRK2	-1.44087	0.854555	-11.9277	2.67e-29	4.21e-28	55.4584
ZBTB4	-1.07022	5.89402	-11.9208	2.85e-29	4.49e-28	55.3932
SLC15A3	-1.49841	4.45897	-11.9166	2.97e-29	4.67e-28	55.3529
SLC15A2	-1.99248	3.68285	-11.9119	3.1e-29	4.87e-28	55.3092
SYT7	2.43474	4.07888	11.91	3.16e-29	4.96e-28	55.2905
PDK1	1.16201	2.72494	11.9082	3.21e-29	5.04e-28	55.2735
DOCK11	-1.48865	3.63523	-11.9075	3.24e-29	5.07e-28	55.2669
RFX2	-1.33287	2.55042	-11.9016	3.42e-29	5.36e-28	55.2117
TXNDC17	1.40457	5.76401	11.895	3.64e-29	5.69e-28	55.1498
GADD45B	-1.60649	6.43042	-11.8887	3.87e-29	6.04e-28	55.0902
FLVCR2	-1.30353	3.33095	-11.8885	3.87e-29	6.05e-28	55.088
MYH10	-1.59065	5.20884	-11.8845	4.03e-29	6.28e-28	55.0499
PTPN1	-1.00891	6.13944	-11.8843	4.03e-29	6.28e-28	55.0488
MYRF	-2.26168	3.15256	-11.8732	4.48e-29	6.98e-28	54.944
SLC44A2	-1.03212	7.07768	-11.8592	5.12e-29	7.95e-28	54.8122
SSR4	1.18052	7.50381	11.8444	5.89e-29	9.13e-28	54.6726
TUBB6	-1.54373	5.21367	-11.8418	6.03e-29	9.34e-28	54.6483
STYK1	1.69303	2.87966	11.8382	6.25e-29	9.67e-28	54.614
SAMHD1	-1.34515	5.1556	-11.8146	7.81e-29	1.21e-27	54.392
HSPB7	-1.52385	2.36558	-11.811	8.08e-29	1.25e-27	54.3581
E2F2	1.36761	2.0526	11.8076	8.34e-29	1.29e-27	54.3268
RALGPS2	1.32017	3.45292	11.8061	8.47e-29	1.3e-27	54.312
LRRC8C	-1.10496	2.6626	-11.806	8.47e-29	1.3e-27	54.3116
ZBTB47	-1.04732	3.14616	-11.8017	8.83e-29	1.36e-27	54.2708
TSACC	1.24176	1.4744	11.7931	9.57e-29	1.47e-27	54.1902
PLCE1	-1.30564	2.32729	-11.7889	9.96e-29	1.53e-27	54.1509
EDN1	-2.16599	5.07567	-11.7887	9.98e-29	1.53e-27	54.1493
KIF23	1.67701	2.83994	11.7851	1.03e-28	1.58e-27	54.1155
TMEM79	1.066	3.2486	11.774	1.15e-28	1.75e-27	54.0113
MAFF	-1.2235	4.07273	-11.7727	1.16e-28	1.77e-27	53.9992
TTC28	-1.20603	2.82209	-11.7651	1.25e-28	1.9e-27	53.9275
MYH11	-2.16913	3.71135	-11.7615	1.29e-28	1.97e-27	53.8934
TTLL7	-1.40204	1.44826	-11.7517	1.42e-28	2.16e-27	53.8023
MSMO1	-1.20346	6.46703	-11.7512	1.42e-28	2.17e-27	53.7969
NHSL2	-1.03867	1.49941	-11.7507	1.43e-28	2.17e-27	53.7928
TIMP1	1.45624	9.69049	11.7423	1.55e-28	2.35e-27	53.7139
GPRIN2	-2.11474	3.65684	-11.7409	1.57e-28	2.38e-27	53.7011
DECR2	1.11682	3.71166	11.7259	1.81e-28	2.73e-27	53.5602
LAMC3	-1.69745	2.72144	-11.7228	1.86e-28	2.81e-27	53.5318
ABLIM3	-1.67987	2.93695	-11.7217	1.88e-28	2.84e-27	53.5211
RFC4	1.39314	4.06312	11.7205	1.9e-28	2.87e-27	53.5103
EME1	1.29906	1.71919	11.7141	2.02e-28	3.04e-27	53.4497
IRAK1	1.10054	7.00352	11.7048	2.2e-28	3.31e-27	53.3633
EGR2	-1.71854	3.66071	-11.6987	2.33e-28	3.5e-27	53.3059
NES	-1.7568	4.76488	-11.6968	2.38e-28	3.57e-27	53.2881
VIM	-1.36932	7.92185	-11.6813	2.75e-28	4.11e-27	53.1432
BMP2	-2.13237	4.21324	-11.6712	3.02e-28	4.51e-27	53.0496
ADCK5	1.30205	3.81555	11.6701	3.05e-28	4.55e-27	53.0395
KCNJ8	-1.57471	3.66357	-11.6663	3.17e-28	4.72e-27	53.0033
CCND2	-1.5249	3.88896	-11.6601	3.35e-28	4.99e-27	52.946
TACC3	1.36177	4.11189	11.6579	3.42e-28	5.09e-27	52.9254
KCTD12	-1.61713	5.90421	-11.654	3.55e-28	5.28e-27	52.8889
PDE1C	-1.15701	0.928035	-11.6522	3.61e-28	5.36e-27	52.8723
INAVA	1.75413	4.31298	11.6489	3.73e-28	5.53e-27	52.8411
KLB	-1.70478	1.06451	-11.6473	3.79e-28	5.61e-27	52.8262
ALDH2	-1.45447	5.90304	-11.6444	3.89e-28	5.76e-27	52.7997
FANCD2	1.05684	2.42265	11.6402	4.05e-28	5.99e-27	52.7599
SLC5A6	1.0045	4.28539	11.6372	4.16e-28	6.15e-27	52.7329
IKBKE	1.01297	3.88025	11.6289	4.5e-28	6.64e-27	52.6552
DTYMK	1.12732	5.22516	11.6271	4.57e-28	6.75e-27	52.6382
ADAMTS15	-1.46453	1.81076	-11.6247	4.68e-28	6.9e-27	52.6165
RHBDL1	1.89068	2.70429	11.6247	4.68e-28	6.9e-27	52.6159
PAK1	1.02074	5.35955	11.6213	4.83e-28	7.11e-27	52.5844
PHLDB2	-1.60556	2.87404	-11.6044	5.66e-28	8.32e-27	52.427
KCNN4	2.54531	4.81057	11.597	6.06e-28	8.91e-27	52.3589
SLC51B	-2.00553	2.37647	-11.5927	6.31e-28	9.27e-27	52.3187
RUSC1	1.03188	4.90149	11.592	6.35e-28	9.32e-27	52.3121
MMP1	3.53932	4.83753	11.5863	6.7e-28	9.83e-27	52.2594
WFDC12	-1.79055	0.869877	-11.5801	7.1e-28	1.04e-26	52.2014
FLT4	-1.29969	3.01931	-11.5762	7.37e-28	1.08e-26	52.1653
LDHA	1.18246	8.53909	11.5591	8.64e-28	1.26e-26	52.0068
COL3A1	2.30937	9.15708	11.5572	8.8e-28	1.29e-26	51.9891
PTGES	2.20536	5.34905	11.5483	9.56e-28	1.39e-26	51.9068
CTDSPL	-1.14694	4.93375	-11.5385	1.05e-27	1.53e-26	51.8153
ANKS1A	-1.08142	4.56491	-11.5335	1.1e-27	1.6e-26	51.7694
LAD1	1.68836	6.13755	11.5315	1.12e-27	1.63e-26	51.7511
C1orf87	-1.62601	0.840786	-11.523	1.21e-27	1.76e-26	51.6723
TYROBP	-1.75353	7.91306	-11.5202	1.24e-27	1.81e-26	51.6457
SCGB1A1	-5.24494	4.95915	-11.5152	1.3e-27	1.89e-26	51.5998
SCD5	-1.94695	3.61132	-11.5066	1.41e-27	2.04e-26	51.5201
NFIX	-1.79449	5.15287	-11.5059	1.42e-27	2.06e-26	51.5138
CENPI	1.4213	1.97336	11.5049	1.43e-27	2.07e-26	51.5045
MARVELD3	1.09059	2.95257	11.4894	1.66e-27	2.39e-26	51.3614
ZNF692	1.41336	4.37838	11.4859	1.71e-27	2.47e-26	51.3287
SPRING1	-1.18486	5.17262	-11.479	1.83e-27	2.63e-26	51.2648
STON1	-1.10056	2.08248	-11.4636	2.11e-27	3.03e-26	51.1226
CYP27B1	1.4897	2.60674	11.4604	2.17e-27	3.12e-26	51.0936
NATD1	-1.22003	3.51448	-11.4471	2.46e-27	3.52e-26	50.9707
LPXN	-1.18666	5.00914	-11.4447	2.51e-27	3.6e-26	50.9485
FOXP3	1.29212	2.40123	11.4403	2.62e-27	3.75e-26	50.9081
CLDN11	-1.47222	1.74989	-11.436	2.72e-27	3.9e-26	50.8683
SLCO2A1	-1.9939	5.18991	-11.4306	2.86e-27	4.09e-26	50.8189
POC1A	1.23075	3.59284	11.4172	3.24e-27	4.63e-26	50.695
IL20RA	-1.85508	2.57951	-11.4169	3.25e-27	4.64e-26	50.6927
CST1	3.73329	3.69591	11.4147	3.32e-27	4.73e-26	50.6724
APOL3	-1.48651	4.29041	-11.4128	3.38e-27	4.81e-26	50.6544
C1QA	-1.91837	8.80462	-11.4068	3.57e-27	5.07e-26	50.5997
AADAC	-2.51986	2.182	-11.3998	3.81e-27	5.41e-26	50.5348
LILRA6	-1.44547	2.63456	-11.3982	3.87e-27	5.49e-26	50.52
NEK7	-1.02112	5.54486	-11.3965	3.93e-27	5.57e-26	50.5049
PKP3	1.36168	5.86485	11.3757	4.76e-27	6.74e-26	50.3135
IL34	-1.4203	2.64523	-11.3734	4.87e-27	6.88e-26	50.2921
S1PR5	-1.11489	1.07197	-11.3693	5.05e-27	7.14e-26	50.2549
POLG2	1.05211	3.25313	11.3651	5.25e-27	7.41e-26	50.2164
HMBS	1.01595	4.28572	11.3581	5.61e-27	7.9e-26	50.1516
NME4	1.22961	6.05882	11.3531	5.87e-27	8.26e-26	50.1058
BRIP1	1.21539	1.57353	11.3513	5.97e-27	8.39e-26	50.0895
MTURN	-1.50224	4.10614	-11.349	6.1e-27	8.56e-26	50.0688
WNT3	1.41582	2.85835	11.3416	6.53e-27	9.15e-26	50.0009
VARS1	1.06458	6.01863	11.3295	7.31e-27	1.02e-25	49.8892
TRIM71	-1.00971	0.499827	-11.3264	7.52e-27	1.05e-25	49.8612
PTGDS	-1.30784	1.64228	-11.3221	7.82e-27	1.09e-25	49.8216
TPPP	-1.96372	3.1665	-11.318	8.12e-27	1.13e-25	49.7846
PPARG	-1.88023	3.51198	-11.3125	8.55e-27	1.19e-25	49.734
CKS1B	1.38505	4.96602	11.3094	8.8e-27	1.22e-25	49.7056
INSYN1	-1.13319	0.954629	-11.3087	8.85e-27	1.23e-25	49.6994
KNL1	1.30643	1.80785	11.3034	9.3e-27	1.29e-25	49.6506
BMP8A	1.59448	2.39821	11.3026	9.36e-27	1.3e-25	49.6436
ABCB1	-1.15156	1.49024	-11.2998	9.61e-27	1.33e-25	49.6173
FAM83D	1.82245	3.79051	11.2996	9.63e-27	1.33e-25	49.6158
ABCA6	-1.05067	1.26589	-11.2965	9.9e-27	1.37e-25	49.5879
CILP2	2.0943	2.56053	11.2957	9.98e-27	1.38e-25	49.5803
HRCT1	-1.67083	2.47078	-11.2952	1e-26	1.39e-25	49.5756
PACRG	-1.52476	1.16176	-11.2886	1.07e-26	1.47e-25	49.5153
PTGFR	-1.51112	1.21206	-11.2882	1.07e-26	1.48e-25	49.5114
VMP1	1.18746	6.78098	11.2823	1.13e-26	1.55e-25	49.4579
TCEAL7	-1.20098	2.20696	-11.2796	1.16e-26	1.59e-25	49.4334
KRT80	2.03695	4.90773	11.2786	1.17e-26	1.61e-25	49.4237
TNS3	-1.22465	5.4618	-11.2779	1.18e-26	1.61e-25	49.4175
BLM	1.19153	1.91962	11.271	1.25e-26	1.72e-25	49.3548
HOATZ	-1.66718	0.970043	-11.2691	1.28e-26	1.75e-25	49.3368
MNDA	-1.75841	4.74238	-11.2668	1.3e-26	1.78e-25	49.3159
FANCI	1.2869	2.7057	11.2656	1.32e-26	1.8e-25	49.3048
ADAMTS14	1.45256	2.03164	11.2576	1.42e-26	1.93e-25	49.2317
ZFP36	-1.83899	8.43891	-11.2573	1.42e-26	1.94e-25	49.2295
CATSPERD	-1.24289	0.603868	-11.251	1.51e-26	2.05e-25	49.172
NUPR1	-1.19305	2.19217	-11.2501	1.52e-26	2.07e-25	49.1638
IL1RL2	1.32951	2.05756	11.2498	1.52e-26	2.07e-25	49.1612
PGM2L1	1.42973	3.72801	11.2488	1.54e-26	2.09e-25	49.1518
LPCAT3	-1.02984	3.44307	-11.247	1.56e-26	2.12e-25	49.1358
LY86	-1.65745	4.57157	-11.2466	1.57e-26	2.13e-25	49.1317
CYS1	-2.02937	2.56863	-11.2431	1.62e-26	2.2e-25	49.0997
CLSPN	1.39043	1.87792	11.2397	1.67e-26	2.26e-25	49.0689
SLCO2B1	-1.7491	4.63104	-11.2353	1.74e-26	2.36e-25	49.0284
CELSR3	1.566	1.89249	11.2315	1.8e-26	2.44e-25	48.9939
RILP	-1.13304	4.53885	-11.2188	2.02e-26	2.73e-25	48.8786
SMAD7	-1.10979	4.49852	-11.2165	2.07e-26	2.79e-25	48.8577
ARHGEF37	-1.40509	2.52217	-11.211	2.17e-26	2.93e-25	48.8077
FGD3	-1.21779	3.23961	-11.2049	2.3e-26	3.1e-25	48.7523
BRIX1	1.03041	4.5825	11.2043	2.31e-26	3.11e-25	48.7466
FAM181A	-1.40989	0.798216	-11.202	2.36e-26	3.18e-25	48.7251
XPR1	1.54151	5.54243	11.1975	2.46e-26	3.3e-25	48.6846
GFUS	1.15503	6.38752	11.1965	2.49e-26	3.33e-25	48.6751
APH1B	-1.04572	3.34484	-11.1906	2.62e-26	3.52e-25	48.6219
SFTPA1	-4.96198	10.0315	-11.189	2.66e-26	3.57e-25	48.6072
DCN	-1.77563	6.39225	-11.1835	2.8e-26	3.75e-25	48.5568
BYSL	1.11791	5.26162	11.1711	3.14e-26	4.19e-25	48.4442
ZNF239	1.20827	2.9126	11.1671	3.25e-26	4.34e-25	48.4086
KIF26A	-1.36112	1.52854	-11.1666	3.27e-26	4.36e-25	48.4034
LST1	-1.60297	4.46823	-11.1586	3.52e-26	4.69e-25	48.3312
SNX25	-1.43466	4.44238	-11.1583	3.53e-26	4.7e-25	48.3285
PREX1	-1.28537	4.42719	-11.156	3.6e-26	4.79e-25	48.3077
RASSF2	-1.39299	4.33504	-11.152	3.73e-26	4.96e-25	48.2714
TNFSF13	-1.21648	4.21171	-11.1496	3.82e-26	5.07e-25	48.2497
ATOH8	-2.33034	3.12732	-11.1395	4.19e-26	5.56e-25	48.1578
CCN4	1.63782	3.27216	11.1392	4.2e-26	5.57e-25	48.1553
TSPAN12	-1.50114	5.31403	-11.1325	4.46e-26	5.91e-25	48.0946
RAB11FIP1	-1.64635	5.12227	-11.1317	4.5e-26	5.95e-25	48.0875
PCSK9	-2.35555	2.38488	-11.1283	4.64e-26	6.13e-25	48.0563
GFRA1	-1.42477	1.26299	-11.1275	4.67e-26	6.17e-25	48.0493
KAZN	-1.11559	1.69008	-11.1258	4.75e-26	6.26e-25	48.0339
GIPC3	-1.05194	2.16187	-11.1257	4.75e-26	6.27e-25	48.0331
SIRPA	-1.43428	5.19733	-11.1246	4.8e-26	6.32e-25	48.0231
OSBPL6	-1.26406	1.46596	-11.1228	4.88e-26	6.43e-25	48.0063
TWNK	1.02212	3.4551	11.1221	4.91e-26	6.46e-25	48.0004
MS4A14	-1.18693	1.51188	-11.1131	5.33e-26	7e-25	47.9188
SIGLEC6	-1.20545	1.23194	-11.1101	5.48e-26	7.19e-25	47.8914
TMED3	1.01068	4.42099	11.1076	5.6e-26	7.35e-25	47.869
RGS22	-1.23556	0.907984	-11.1074	5.62e-26	7.36e-25	47.8667
P4HA3	1.40917	2.34847	11.105	5.74e-26	7.51e-25	47.8449
TPBG	1.47397	4.883	11.0964	6.21e-26	8.11e-25	47.7675
KMO	-1.0064	1.51883	-11.091	6.52e-26	8.52e-25	47.7188
CENPM	1.47572	3.64201	11.0866	6.79e-26	8.86e-25	47.6785
FIGNL1	1.20397	3.37258	11.0845	6.92e-26	9.03e-25	47.6595
CCDC173	-1.46411	1.41493	-11.0745	7.58e-26	9.86e-25	47.5695
C1QB	-1.95181	8.74562	-11.0742	7.6e-26	9.88e-25	47.5671
NFASC	-1.05603	1.20171	-11.0736	7.64e-26	9.93e-25	47.5615
HNF4G	1.76002	2.15719	11.0726	7.71e-26	1e-24	47.5526
RETREG1	-1.79757	3.04635	-11.0694	7.94e-26	1.03e-24	47.5237
ABCC3	2.10707	5.78205	11.0682	8.03e-26	1.04e-24	47.5129
GALNT13	-1.5625	1.15753	-11.0646	8.3e-26	1.07e-24	47.4801
DTL	1.49737	3.17739	11.0613	8.55e-26	1.1e-24	47.45
PYCR3	1.12007	4.09815	11.0608	8.58e-26	1.11e-24	47.4462
IRX1	-1.92641	1.32476	-11.0477	9.68e-26	1.25e-24	47.3274
PALD1	-1.28016	3.62847	-11.0435	1e-25	1.29e-24	47.2899
TDRKH	1.14334	4.15241	11.0432	1.01e-25	1.3e-24	47.2874
CENPK	1.34775	2.29382	11.0432	1.01e-25	1.3e-24	47.2873
ZMYND15	-1.15968	2.74331	-11.0424	1.02e-25	1.31e-24	47.2795
DUSP1	-1.95289	8.68735	-11.0294	1.14e-25	1.47e-24	47.1625
ACP6	1.00222	2.91699	11.0291	1.15e-25	1.47e-24	47.1602
DNAJB4	-1.34067	3.9745	-11.0281	1.16e-25	1.48e-24	47.1508
ASGR1	-1.05761	1.94738	-11.0279	1.16e-25	1.48e-24	47.1491
CDC25A	1.32797	2.03787	11.0267	1.17e-25	1.5e-24	47.1385
TPSAB1	-2.22149	4.537	-11.0228	1.21e-25	1.55e-24	47.1034
OTULINL	-1.72746	4.01172	-11.0216	1.23e-25	1.57e-24	47.0924
CHTF18	1.33277	3.07657	11.0207	1.24e-25	1.58e-24	47.0838
CCN2	-1.81486	7.79788	-11.0195	1.25e-25	1.6e-24	47.0732
SULT1A1	-1.30228	2.71921	-11.0099	1.36e-25	1.74e-24	46.9869
MATN3	-1.75341	2.90354	-11.0087	1.38e-25	1.75e-24	46.9762
NCKAP1L	-1.4546	3.88133	-10.9919	1.61e-25	2.04e-24	46.8247
DAB2IP	-1.10178	4.61259	-10.9891	1.65e-25	2.09e-24	46.8001
PIK3R5	-1.22777	2.81923	-10.9817	1.76e-25	2.23e-24	46.7338
AATK	-1.52127	2.28493	-10.9796	1.8e-25	2.27e-24	46.7146
PUS7	1.03384	3.95768	10.9777	1.83e-25	2.31e-24	46.6977
TFAP2A	1.762	2.01005	10.9761	1.85e-25	2.34e-24	46.6834
CCDC81	-1.00488	0.785426	-10.9751	1.87e-25	2.36e-24	46.6744
GYG2	1.66405	3.17879	10.9749	1.87e-25	2.37e-24	46.672
F2RL3	-1.47123	2.5875	-10.9747	1.88e-25	2.37e-24	46.6709
DDO	-1.40584	2.24081	-10.9744	1.88e-25	2.37e-24	46.6677
MAP6	-1.38786	2.10678	-10.9734	1.9e-25	2.39e-24	46.6591
C11orf97	-1.84928	1.04526	-10.9673	2.01e-25	2.53e-24	46.6038
CPAMD8	-2.12439	2.9384	-10.9549	2.25e-25	2.83e-24	46.4925
XDH	2.13018	2.70892	10.9543	2.26e-25	2.84e-24	46.4873
LTC4S	-1.21255	2.67376	-10.9535	2.27e-25	2.86e-24	46.4803
PPFIBP1	-1.19834	3.76107	-10.9485	2.38e-25	2.98e-24	46.4354
CCL24	-1.93428	2.22164	-10.9481	2.39e-25	2.99e-24	46.432
NDNF	-2.58191	5.49503	-10.9455	2.44e-25	3.06e-24	46.4087
B3GALNT1	-1.37938	2.68752	-10.9437	2.48e-25	3.1e-24	46.3926
GABARAPL1	-1.20864	5.76643	-10.9368	2.65e-25	3.3e-24	46.3305
CORO1C	-1.02208	6.13176	-10.936	2.66e-25	3.32e-24	46.3232
MEIS1	-1.04731	2.28518	-10.9323	2.76e-25	3.44e-24	46.2897
PFKP	1.68742	5.33033	10.9281	2.86e-25	3.56e-24	46.2529
INSIG1	-1.16007	5.52807	-10.9254	2.93e-25	3.65e-24	46.2286
STAC3	-1.03781	2.97628	-10.9244	2.96e-25	3.68e-24	46.2198
FRAS1	-1.53309	1.7861	-10.9239	2.97e-25	3.69e-24	46.215
CYP24A1	3.53553	3.8616	10.9238	2.97e-25	3.69e-24	46.214
ESCO2	1.10275	1.42058	10.9154	3.21e-25	3.98e-24	46.139
PIK3IP1	-1.1612	5.53399	-10.9135	3.26e-25	4.04e-24	46.1218
NEIL3	1.76906	1.93859	10.909	3.4e-25	4.2e-24	46.0816
AQP1	-2.65164	7.6786	-10.9009	3.66e-25	4.52e-24	46.0095
ARAP2	-1.21668	3.08842	-10.9006	3.67e-25	4.53e-24	46.0062
HDHD3	1.02129	5.35185	10.8918	3.97e-25	4.9e-24	45.9281
IL6	-2.19812	2.96507	-10.891	4e-25	4.94e-24	45.9201
PIK3R1	-1.13027	3.97139	-10.8824	4.32e-25	5.33e-24	45.8435
SFTPA2	-4.7354	10.3248	-10.8793	4.45e-25	5.47e-24	45.8159
BCL2L15	1.74649	2.19504	10.8766	4.55e-25	5.6e-24	45.7923
AQP9	-1.81908	3.37751	-10.8756	4.6e-25	5.64e-24	45.7826
PPP1R14D	3.34673	3.72291	10.8657	5.03e-25	6.17e-24	45.6942
GPC5	-1.43336	1.05212	-10.8622	5.19e-25	6.36e-24	45.663
ALG1L	2.21446	3.37654	10.8605	5.26e-25	6.44e-24	45.6487
ETS1	-1.3241	5.56797	-10.8605	5.26e-25	6.44e-24	45.6485
F12	1.37668	1.8974	10.8604	5.27e-25	6.44e-24	45.6474
PLA2G3	-1.71703	1.44863	-10.8501	5.78e-25	7.06e-24	45.5553
TCP11L2	-1.0091	2.43312	-10.8475	5.92e-25	7.22e-24	45.5327
PITX1	2.48897	2.76716	10.8434	6.14e-25	7.48e-24	45.496
RASSF8	-1.54685	3.36248	-10.84	6.33e-25	7.72e-24	45.4653
BICDL1	1.55399	3.40313	10.8361	6.56e-25	7.98e-24	45.4303
CNFN	1.79493	3.15414	10.8297	6.94e-25	8.44e-24	45.374
FHL2	1.8197	4.42089	10.8267	7.13e-25	8.66e-24	45.3472
IFNGR1	-1.05083	6.84189	-10.8267	7.13e-25	8.66e-24	45.3469
EMP1	-1.58791	5.71561	-10.8206	7.54e-25	9.14e-24	45.2927
MROH6	1.87037	4.50103	10.8183	7.7e-25	9.32e-24	45.2719
C5orf34	1.11836	1.88571	10.8176	7.74e-25	9.37e-24	45.2662
EVI2B	-1.41657	5.04205	-10.813	8.07e-25	9.75e-24	45.225
GNGT2	-1.06238	2.35935	-10.8038	8.77e-25	1.06e-23	45.1429
MCC	-1.20164	2.27304	-10.7969	9.32e-25	1.12e-23	45.0819
CXCL13	2.88261	4.89581	10.7964	9.37e-25	1.13e-23	45.0772
SIK2	-1.00867	4.31231	-10.7904	9.89e-25	1.19e-23	45.0237
LNX2	-1.08344	4.6598	-10.7892	9.99e-25	1.2e-23	45.013
CD244	-1.07581	1.66967	-10.7889	1e-24	1.2e-23	45.0106
THEMIS2	-1.19744	5.04868	-10.7826	1.06e-24	1.27e-23	44.9548
PLK4	1.31079	2.56132	10.7768	1.12e-24	1.34e-23	44.9036
GCNT3	2.73765	3.19253	10.775	1.13e-24	1.36e-23	44.8874
EMILIN2	-1.25942	3.99404	-10.7675	1.21e-24	1.45e-23	44.8207
ARHGAP29	-1.30994	3.381	-10.7638	1.25e-24	1.49e-23	44.7882
MAP3K8	-1.10946	4.20678	-10.7602	1.3e-24	1.54e-23	44.7559
SEMA3B	-2.13191	4.04689	-10.7558	1.35e-24	1.6e-23	44.7167
TBC1D4	-1.04893	3.5073	-10.7535	1.38e-24	1.64e-23	44.6962
MMP12	3.08333	4.33385	10.7509	1.41e-24	1.67e-23	44.6738
MIS18A	1.0378	4.46762	10.7505	1.41e-24	1.68e-23	44.6696
VGLL3	-1.54185	2.55676	-10.7488	1.43e-24	1.7e-23	44.6552
GRHL3	1.37793	1.56311	10.7454	1.48e-24	1.75e-23	44.6247
SERTAD1	-1.18256	5.28545	-10.7448	1.49e-24	1.76e-23	44.6192
CHEK2	1.10524	3.26276	10.7347	1.63e-24	1.92e-23	44.5296
MYO1B	-1.04823	5.75874	-10.7277	1.73e-24	2.04e-23	44.4685
COLGALT2	-1.27796	0.997148	-10.7252	1.77e-24	2.09e-23	44.4463
RAB8B	-1.10863	4.48793	-10.7202	1.85e-24	2.18e-23	44.4018
PDPN	-1.74197	4.48409	-10.7187	1.88e-24	2.21e-23	44.3882
CENPE	1.37323	1.97356	10.7177	1.89e-24	2.23e-23	44.3792
ATAD2	1.4141	4.14659	10.7151	1.94e-24	2.27e-23	44.357
TCF4	-1.18318	2.80557	-10.7125	1.98e-24	2.33e-23	44.3334
TCTEX1D1	-1.20249	1.09972	-10.7122	1.99e-24	2.33e-23	44.3308
KANK4	-1.43439	1.33425	-10.7078	2.07e-24	2.42e-23	44.292
TTYH3	1.27957	6.09593	10.7058	2.11e-24	2.47e-23	44.274
CXCL16	-1.19355	7.27687	-10.7021	2.18e-24	2.55e-23	44.2415
NXPE3	-1.03077	2.84444	-10.7013	2.19e-24	2.56e-23	44.2349
REPS2	-1.19509	2.71653	-10.6959	2.3e-24	2.69e-23	44.1872
WWTR1	-1.1292	5.09444	-10.6896	2.43e-24	2.84e-23	44.1314
HCK	-1.60809	5.05904	-10.689	2.45e-24	2.85e-23	44.1258
TNNI2	-1.75696	2.47013	-10.6878	2.47e-24	2.88e-23	44.115
TFR2	1.13283	1.37556	10.6824	2.59e-24	3.02e-23	44.0675
KLRF1	-1.36315	1.68246	-10.6725	2.83e-24	3.3e-23	43.9806
SEC14L1	-1.04679	4.80897	-10.6698	2.9e-24	3.37e-23	43.9567
SEMA4B	1.4035	6.1932	10.6676	2.96e-24	3.44e-23	43.9372
RDX	-1.09639	5.26419	-10.6671	2.97e-24	3.45e-23	43.9325
NCAPG2	1.32971	3.58069	10.6662	3e-24	3.48e-23	43.9243
HPGDS	-1.57586	2.312	-10.666	3e-24	3.48e-23	43.9231
GMDS	1.12989	4.33	10.6643	3.05e-24	3.53e-23	43.9081
SLC2A5	1.42322	2.02235	10.6622	3.1e-24	3.59e-23	43.8896
ENO1	1.0839	9.96332	10.6581	3.22e-24	3.72e-23	43.8537
ANO6	-1.04557	5.10891	-10.6566	3.26e-24	3.77e-23	43.8402
GATA5	-1.03551	1.05937	-10.6421	3.71e-24	4.28e-23	43.7124
ANKRD66	-1.23247	0.656047	-10.6345	3.97e-24	4.58e-23	43.6453
FAT4	-1.23312	1.75984	-10.634	3.99e-24	4.6e-23	43.6411
POLQ	1.21589	1.38955	10.6333	4.02e-24	4.62e-23	43.6347
BCL9	1.15468	4.54727	10.6302	4.13e-24	4.75e-23	43.6078
ANKRD22	1.96314	3.71211	10.6287	4.18e-24	4.8e-23	43.594
AK1	-1.37842	3.70366	-10.6284	4.19e-24	4.81e-23	43.5918
JAM3	-1.32194	2.57511	-10.6236	4.38e-24	5.01e-23	43.5493
ZCCHC24	-1.10202	4.11976	-10.6217	4.45e-24	5.09e-23	43.5326
KLF10	-1.06587	5.99242	-10.619	4.56e-24	5.21e-23	43.5089
ARHGAP40	2.18912	2.73608	10.6108	4.9e-24	5.59e-23	43.4368
ST14	1.30298	7.63827	10.6087	4.99e-24	5.69e-23	43.4186
LRRC4B	-1.03915	1.35403	-10.6036	5.23e-24	5.95e-23	43.3734
MID1IP1	-1.17399	5.5934	-10.6032	5.24e-24	5.96e-23	43.3703
LIMD1	-1.00497	3.27363	-10.5987	5.46e-24	6.2e-23	43.3306
MCM6	1.2294	5.17832	10.5971	5.53e-24	6.29e-23	43.3168
FAR2	-1.29913	2.42734	-10.58	6.44e-24	7.29e-23	43.1669
C7	-2.60774	4.74893	-10.5776	6.58e-24	7.45e-23	43.1454
VSTM4	-1.32162	2.84014	-10.5745	6.76e-24	7.65e-23	43.1184
CD300E	-1.35835	1.99926	-10.5741	6.78e-24	7.67e-23	43.115
LRCH2	-1.37317	1.86195	-10.5731	6.85e-24	7.73e-23	43.1058
C2CD4A	2.28813	2.84067	10.5685	7.13e-24	8.04e-23	43.0659
PKDCC	-1.63188	3.35649	-10.5671	7.22e-24	8.14e-23	43.0534
CP	2.77441	5.97523	10.5667	7.25e-24	8.16e-23	43.0498
DAB2	-1.28121	4.74808	-10.5565	7.92e-24	8.92e-23	42.961
PXDC1	-1.21762	5.61091	-10.5559	7.97e-24	8.96e-23	42.9556
FHDC1	-1.23666	3.62276	-10.555	8.04e-24	9.04e-23	42.9471
RGS17	1.66937	1.95184	10.554	8.1e-24	9.11e-23	42.9387
RIMS4	-1.12131	0.615378	-10.5487	8.49e-24	9.53e-23	42.8922
ARRDC4	-1.32616	4.21818	-10.5433	8.91e-24	9.99e-23	42.8449
MYLK	-1.4076	3.68155	-10.5376	9.37e-24	1.05e-22	42.7953
CADM1	-1.89241	4.64499	-10.5308	9.95e-24	1.11e-22	42.7359
CNN1	-1.62588	3.75922	-10.5302	1e-23	1.12e-22	42.73
IL18R1	-1.24663	2.16307	-10.5286	1.01e-23	1.13e-22	42.7166
DIAPH2	-1.00756	3.19798	-10.525	1.05e-23	1.17e-22	42.6854
TMEM132A	1.58329	4.20233	10.5223	1.07e-23	1.2e-22	42.6618
ARMCX1	-1.21535	4.20237	-10.5204	1.09e-23	1.22e-22	42.6446
BLACAT1	1.43304	1.89977	10.5182	1.11e-23	1.24e-22	42.6254
CELF2	-1.41835	4.4463	-10.5165	1.13e-23	1.26e-22	42.6107
ZC3HAV1L	1.20884	3.18462	10.5145	1.15e-23	1.28e-22	42.5932
FCER1G	-1.47312	7.3243	-10.5122	1.17e-23	1.3e-22	42.5729
P2RX1	-1.10978	1.96667	-10.5121	1.17e-23	1.3e-22	42.5722
ARHGAP25	-1.03754	3.53546	-10.5021	1.28e-23	1.42e-22	42.4849
MTHFD2	1.21897	3.92509	10.4968	1.34e-23	1.49e-22	42.4386
COL11A1	2.87442	2.91014	10.4962	1.35e-23	1.49e-22	42.4332
ZNF331	-1.17731	3.33284	-10.4956	1.36e-23	1.5e-22	42.4278
CNR1	-1.48797	1.73391	-10.4898	1.43e-23	1.58e-22	42.378
FBXO32	1.50057	4.30747	10.4885	1.44e-23	1.6e-22	42.3666
SEC14L4	-1.64705	2.13999	-10.4879	1.45e-23	1.6e-22	42.3614
THBS2	2.22172	4.48741	10.4859	1.48e-23	1.63e-22	42.3434
ABHD11	1.22504	5.77387	10.4755	1.62e-23	1.78e-22	42.253
ARHGAP30	-1.27096	4.65082	-10.4738	1.64e-23	1.81e-22	42.2378
CCDC102B	-1.00309	2.32	-10.4714	1.68e-23	1.85e-22	42.2169
ADAM8	1.67891	5.00103	10.4681	1.73e-23	1.9e-22	42.1887
TICRR	1.10777	1.35065	10.4671	1.74e-23	1.91e-22	42.18
ADCY9	-1.28808	3.79082	-10.4669	1.75e-23	1.92e-22	42.1781
NFAM1	-1.36827	3.23211	-10.4668	1.75e-23	1.92e-22	42.1776
THRA	-1.00687	4.14411	-10.457	1.91e-23	2.08e-22	42.0917
SALL4	1.2888	1.45782	10.4521	1.99e-23	2.17e-22	42.0489
CPA3	-2.33196	4.93805	-10.4484	2.05e-23	2.24e-22	42.0172
PRELP	-1.86547	5.24454	-10.4472	2.08e-23	2.26e-22	42.0067
RAD51AP1	1.47509	3.28966	10.4408	2.2e-23	2.39e-22	41.9506
EHD2	-1.48406	6.93039	-10.4402	2.21e-23	2.4e-22	41.9459
TNFRSF18	1.87297	3.72751	10.4344	2.32e-23	2.52e-22	41.8954
CPNE7	1.80291	2.50494	10.4337	2.34e-23	2.54e-22	41.8892
FAM216B	-2.37801	1.86071	-10.4328	2.36e-23	2.55e-22	41.8817
TNFAIP8L3	-1.1905	2.60639	-10.4207	2.62e-23	2.84e-22	41.7767
GAB2	-1.15862	4.41439	-10.4184	2.67e-23	2.9e-22	41.7559
ITGA11	1.89854	3.04472	10.4151	2.75e-23	2.98e-22	41.7279
GPR65	-1.07086	2.1735	-10.4149	2.76e-23	2.98e-22	41.7256
PODXL	-1.14968	5.23411	-10.413	2.8e-23	3.03e-22	41.7093
BAIAP2L1	1.07863	5.38147	10.406	2.98e-23	3.22e-22	41.6487
SIRPB2	-1.16385	2.23871	-10.4034	3.05e-23	3.29e-22	41.6263
CHI3L2	-2.11382	3.66213	-10.4005	3.13e-23	3.37e-22	41.6013
DBF4	1.04039	3.20569	10.3879	3.49e-23	3.77e-22	41.4914
ECM2	-1.3226	2.99334	-10.3817	3.69e-23	3.97e-22	41.4378
PARD6B	-1.16095	3.76855	-10.3788	3.78e-23	4.07e-22	41.4131
TMEM164	-1.05197	4.98418	-10.3686	4.14e-23	4.44e-22	41.3243
WNT9A	-1.34791	2.97698	-10.3669	4.2e-23	4.51e-22	41.3098
SELE	-1.52829	1.42975	-10.3615	4.4e-23	4.72e-22	41.2633
STEAP1	2.11852	4.76842	10.3576	4.55e-23	4.88e-22	41.2295
APBB2	-1.04668	3.24228	-10.3532	4.73e-23	5.06e-22	41.1914
RORA	-1.10769	2.15235	-10.3505	4.84e-23	5.18e-22	41.1677
SPDEF	2.42646	5.1115	10.35	4.86e-23	5.19e-22	41.1635
SCARF1	-1.28824	3.64622	-10.3465	5.01e-23	5.35e-22	41.1336
MAGI1	-1.09002	3.10791	-10.3452	5.07e-23	5.41e-22	41.1219
HECW2	-1.07434	2.06495	-10.345	5.08e-23	5.41e-22	41.1205
ANXA8	-1.53482	0.975831	-10.343	5.17e-23	5.5e-22	41.1034
TCTE1	-1.29394	0.771568	-10.3403	5.29e-23	5.63e-22	41.0799
ADAM28	1.53823	3.18914	10.337	5.45e-23	5.79e-22	41.0511
PODXL2	2.41546	5.34036	10.3365	5.47e-23	5.81e-22	41.0474
RAC3	1.72123	4.43977	10.3198	6.33e-23	6.7e-22	40.9027
GRAMD2A	-1.67675	3.6215	-10.3193	6.35e-23	6.72e-22	40.8989
LAMB2	-1.07154	6.40876	-10.3186	6.4e-23	6.77e-22	40.8922
C2CD4D	1.23446	1.80237	10.3172	6.47e-23	6.84e-22	40.881
TMSB15A	-1.63927	1.74107	-10.3084	6.99e-23	7.38e-22	40.8049
C9orf24	-2.45339	2.26229	-10.3073	7.06e-23	7.45e-22	40.7951
PLXNB3	1.94104	2.65253	10.3072	7.06e-23	7.45e-22	40.7942
ELMO1	-1.12142	3.06263	-10.3047	7.22e-23	7.61e-22	40.7723
SDC2	-1.38338	5.1607	-10.2974	7.69e-23	8.1e-22	40.7096
COL13A1	-1.05547	1.58372	-10.2967	7.73e-23	8.14e-22	40.7042
PARD3B	-1.1009	2.54927	-10.2862	8.48e-23	8.9e-22	40.6132
CES1	-2.80004	5.71339	-10.2855	8.53e-23	8.95e-22	40.6072
PLAGL1	-1.29468	2.71078	-10.2847	8.59e-23	9e-22	40.6007
STK39	1.28149	5.52386	10.2823	8.77e-23	9.19e-22	40.5796
ATAD3A	1.02285	4.54625	10.2776	9.13e-23	9.56e-22	40.5394
CABCOCO1	-1.79493	1.86205	-10.2745	9.38e-23	9.82e-22	40.5128
GMNN	1.10787	4.38707	10.2726	9.54e-23	9.98e-22	40.4961
CXCL12	-1.57984	4.18008	-10.2714	9.64e-23	1.01e-21	40.4864
SH2B3	-1.05061	4.27925	-10.2686	9.88e-23	1.03e-21	40.4617
RHOV	2.51265	4.45073	10.2679	9.93e-23	1.04e-21	40.4563
ITGAL	-1.34113	3.52808	-10.2627	1.04e-22	1.08e-21	40.411
SGCB	-1.04667	4.45952	-10.2477	1.18e-22	1.23e-21	40.2828
SULF1	2.01321	5.12288	10.2454	1.21e-22	1.25e-21	40.2628
ABCA12	1.75889	1.71211	10.2447	1.22e-22	1.26e-21	40.2563
VASH1	-1.07102	3.0646	-10.2434	1.23e-22	1.27e-21	40.2451
LARGE2	1.85188	4.59829	10.2415	1.25e-22	1.29e-21	40.2287
PARPBP	1.07314	1.73481	10.2392	1.27e-22	1.32e-21	40.2093
SLA	-1.28305	3.82376	-10.2345	1.33e-22	1.37e-21	40.1693
H2AX	1.13869	6.20141	10.234	1.33e-22	1.38e-21	40.1651
YDJC	1.05289	5.15732	10.2323	1.35e-22	1.4e-21	40.1504
CEACAM1	1.55762	4.4244	10.2306	1.37e-22	1.42e-21	40.1358
BHLHA15	1.78021	3.03979	10.2306	1.37e-22	1.42e-21	40.1354
RAB19	1.04865	2.60586	10.2279	1.41e-22	1.45e-21	40.1123
HAS1	-1.43563	0.931672	-10.2248	1.44e-22	1.49e-21	40.0859
GRTP1	1.11983	3.51577	10.2227	1.47e-22	1.51e-21	40.0677
PRR11	1.48975	3.01458	10.2219	1.48e-22	1.52e-21	40.0607
KLF15	-1.79634	2.93643	-10.2202	1.5e-22	1.54e-21	40.0463
RASGRP2	-1.21038	2.18614	-10.2138	1.59e-22	1.63e-21	39.9919
CCN1	-1.72994	7.1203	-10.2098	1.64e-22	1.69e-21	39.9577
MNX1	1.22415	1.23425	10.208	1.67e-22	1.71e-21	39.9423
GINS4	1.19734	1.78619	10.2005	1.78e-22	1.82e-21	39.8773
ETV5	-1.30147	4.71505	-10.2003	1.79e-22	1.82e-21	39.8759
C11orf21	-1.01368	1.35209	-10.1984	1.81e-22	1.85e-21	39.8599
FOXF2	-1.4508	3.10794	-10.1983	1.82e-22	1.85e-21	39.8587
DHCR24	-1.19152	8.20053	-10.1972	1.83e-22	1.87e-21	39.8494
ARHGAP11A	1.30265	2.55349	10.1932	1.9e-22	1.93e-21	39.8152
ALPP	-1.67048	1.11371	-10.1895	1.96e-22	1.99e-21	39.7837
DIPK2A	-1.0636	3.73693	-10.187	2e-22	2.04e-21	39.7623
C1orf21	-1.31968	3.50603	-10.187	2e-22	2.04e-21	39.7618
PABPC1L	1.74872	4.02895	10.1868	2.01e-22	2.04e-21	39.7606
ATF3	-1.7997	5.10727	-10.1862	2.02e-22	2.05e-21	39.7557
TBC1D2	-1.30008	5.48493	-10.1825	2.08e-22	2.11e-21	39.7239
TUBA1A	-1.32621	7.01137	-10.1788	2.15e-22	2.18e-21	39.6917
HCN3	1.07586	2.17639	10.1776	2.17e-22	2.2e-21	39.6819
ATAD3B	1.15889	3.40329	10.1775	2.17e-22	2.2e-21	39.6807
HCAR2	-1.93373	3.01219	-10.1768	2.19e-22	2.21e-21	39.6753
GALNT14	2.18778	3.09049	10.1756	2.21e-22	2.23e-21	39.6646
ATAT1	1.03572	3.52506	10.1729	2.26e-22	2.28e-21	39.642
NCF1	-1.21296	2.37099	-10.1724	2.27e-22	2.29e-21	39.6371
LAPTM5	-1.42459	7.20066	-10.1686	2.35e-22	2.36e-21	39.6051
GUCA2A	-1.36374	0.697843	-10.1684	2.35e-22	2.37e-21	39.6032
AMIGO1	-1.10915	2.94411	-10.1395	3.02e-22	3.03e-21	39.3566
IL1A	-1.58785	1.45102	-10.1371	3.08e-22	3.09e-21	39.3359
TUBG1	1.02477	5.52567	10.1348	3.14e-22	3.15e-21	39.3166
NMU	2.41929	2.86765	10.1329	3.19e-22	3.2e-21	39.3003
C19orf38	-1.08451	2.65846	-10.1321	3.21e-22	3.22e-21	39.2938
SLC17A9	1.70968	3.39091	10.128	3.33e-22	3.33e-21	39.2585
KCNAB2	-1.03023	2.96148	-10.1269	3.36e-22	3.36e-21	39.2491
AOX1	-1.60947	2.3823	-10.112	3.82e-22	3.81e-21	39.1223
CXCL2	-2.17513	5.92285	-10.1104	3.87e-22	3.87e-21	39.1087
ID3	-1.29876	6.43432	-10.1082	3.95e-22	3.94e-21	39.0904
TPSB2	-2.28836	4.51357	-10.1024	4.15e-22	4.14e-21	39.0403
C6	-1.69112	1.29897	-10.1008	4.21e-22	4.19e-21	39.0275
CPXM1	1.72292	3.72437	10.0974	4.33e-22	4.31e-21	38.9984
SLFN13	1.37026	3.7667	10.0968	4.36e-22	4.33e-21	38.9928
RHPN1	1.55895	4.41666	10.0928	4.5e-22	4.47e-21	38.9595
MB	2.11179	2.98399	10.0906	4.59e-22	4.55e-21	38.9404
CREB3L4	1.1273	4.44248	10.0894	4.64e-22	4.59e-21	38.9304
ENTPD8	1.77118	1.85709	10.0885	4.68e-22	4.63e-21	38.9225
ITPKA	2.58537	2.97753	10.0851	4.81e-22	4.76e-21	38.8938
KCNJ15	-2.15347	3.52402	-10.083	4.9e-22	4.85e-21	38.8758
C1orf158	-1.19545	0.630305	-10.0808	4.99e-22	4.93e-21	38.8574
CFAP58	-1.12625	0.924621	-10.0792	5.06e-22	5e-21	38.8438
FUT3	1.74713	4.40302	10.0778	5.13e-22	5.06e-21	38.8317
GNPNAT1	1.1658	3.96552	10.0776	5.13e-22	5.06e-21	38.8302
DNAJC22	1.72455	2.17041	10.0704	5.46e-22	5.38e-21	38.7692
DNAJC12	2.55398	3.77043	10.0691	5.52e-22	5.44e-21	38.7576
CENPH	1.08405	3.48862	10.06	5.97e-22	5.86e-21	38.6804
WDR62	1.28194	2.03552	10.0599	5.98e-22	5.87e-21	38.6794
WDHD1	1.22178	2.9008	10.0595	6e-22	5.88e-21	38.6763
DDX11	1.18642	3.20268	10.0588	6.03e-22	5.91e-21	38.6705
IGFBP3	1.87912	7.16861	10.0577	6.09e-22	5.97e-21	38.6609
ZNF217	1.12116	5.28185	10.0244	8.09e-22	7.88e-21	38.3794
NHLRC4	-1.18767	1.55299	-10.022	8.26e-22	8.04e-21	38.3593
GBP4	-1.59581	4.78618	-10.0183	8.53e-22	8.29e-21	38.3277
TEKT1	-2.07294	1.49601	-10.003	9.72e-22	9.42e-21	38.198
ETV1	-1.54247	3.64404	-9.98991	1.09e-21	1.05e-20	38.0878
SMARCA2	-1.01915	3.94133	-9.98741	1.11e-21	1.07e-20	38.0667
MRGPRF	-1.19781	2.3101	-9.98739	1.11e-21	1.07e-20	38.0666
CDKN2B	-1.61531	4.19845	-9.98476	1.14e-21	1.1e-20	38.0444
TMEM178A	-1.51191	1.96544	-9.9791	1.19e-21	1.15e-20	37.9966
MEST	1.15524	5.021	9.97673	1.22e-21	1.17e-20	37.9766
TWIST2	-1.22343	2.15318	-9.97396	1.24e-21	1.2e-20	37.9533
EMP3	-1.23112	6.13786	-9.96941	1.29e-21	1.25e-20	37.915
VSIG2	-2.67655	4.89039	-9.95967	1.41e-21	1.35e-20	37.8329
TNFRSF25	1.44084	3.08048	9.9576	1.43e-21	1.38e-20	37.8155
ADAM12	1.77583	2.63767	9.95476	1.47e-21	1.41e-20	37.7916
CBFA2T3	-1.09683	1.92759	-9.95266	1.49e-21	1.43e-20	37.7739
MOB3B	-1.15335	2.92345	-9.93996	1.66e-21	1.59e-20	37.6671
SGK1	-1.32217	5.03283	-9.93967	1.67e-21	1.6e-20	37.6646
ADGRD1	-1.72757	2.77675	-9.93945	1.67e-21	1.6e-20	37.6627
CABLES2	1.02655	3.74172	9.9365	1.71e-21	1.64e-20	37.6379
TMEM212	-1.24192	0.675617	-9.93459	1.74e-21	1.67e-20	37.6219
UACA	-1.07214	3.68025	-9.93327	1.76e-21	1.68e-20	37.6108
MICALL2	1.25597	4.02382	9.93279	1.77e-21	1.69e-20	37.6068
THSD4	-1.16679	2.39104	-9.9298	1.81e-21	1.73e-20	37.5816
PDZRN3	-1.16934	2.5748	-9.91925	1.98e-21	1.89e-20	37.493
CFAP77	-1.66449	1.19082	-9.91372	2.08e-21	1.98e-20	37.4466
FBXL19	1.00109	3.90295	9.90428	2.25e-21	2.14e-20	37.3674
FAM184A	-1.41285	2.31834	-9.9007	2.32e-21	2.2e-20	37.3373
CYP2F1	-1.4252	0.814518	-9.89787	2.38e-21	2.26e-20	37.3136
FCGR3A	-1.63977	6.71495	-9.89495	2.43e-21	2.31e-20	37.2891
MACROD2	-1.78699	2.20641	-9.89156	2.51e-21	2.38e-20	37.2608
PLEKHH2	-1.41373	2.83148	-9.88809	2.58e-21	2.44e-20	37.2316
MS4A4A	-1.45404	4.4907	-9.88801	2.58e-21	2.44e-20	37.2309
UST	-1.35634	2.67979	-9.88609	2.62e-21	2.48e-20	37.2149
STARD4	-1.05111	3.53484	-9.88589	2.63e-21	2.49e-20	37.2132
EXOSC5	1.03627	5.39158	9.87609	2.86e-21	2.7e-20	37.1312
GNG7	-1.14602	2.71683	-9.87452	2.89e-21	2.73e-20	37.118
FMO3	-1.40921	3.27138	-9.87283	2.94e-21	2.77e-20	37.1039
THRB	-1.08387	1.91203	-9.8726	2.94e-21	2.77e-20	37.1019
HLF	-2.00639	2.97112	-9.86454	3.15e-21	2.96e-20	37.0344
PIF1	1.11322	1.64429	9.86025	3.27e-21	3.07e-20	36.9986
FAM180A	-1.04684	1.25695	-9.85736	3.35e-21	3.14e-20	36.9744
FBLN1	-1.58148	5.96441	-9.85117	3.53e-21	3.31e-20	36.9227
TEF	-1.24058	4.30753	-9.84487	3.72e-21	3.49e-20	36.87
SORT1	-1.00857	5.63042	-9.84481	3.72e-21	3.49e-20	36.8696
CX3CR1	-1.56494	2.18787	-9.84225	3.8e-21	3.56e-20	36.8482
LRRC71	-1.47946	0.994479	-9.84109	3.84e-21	3.59e-20	36.8385
CSTA	-1.59333	4.00157	-9.8406	3.86e-21	3.61e-20	36.8344
ZP3	1.32651	2.63413	9.83492	4.04e-21	3.78e-20	36.787
SIX1	1.93755	3.42925	9.83155	4.16e-21	3.89e-20	36.7588
SEMA3D	-1.06999	1.21452	-9.82614	4.36e-21	4.07e-20	36.7137
SBK1	1.8239	3.74461	9.82149	4.53e-21	4.22e-20	36.6749
PRRT1B	-1.71227	2.43273	-9.82139	4.53e-21	4.23e-20	36.6741
AUNIP	1.19025	1.87711	9.82049	4.57e-21	4.26e-20	36.6666
COL5A2	1.73446	5.85583	9.81621	4.74e-21	4.41e-20	36.6309
NR4A1	-2.03657	5.07735	-9.81303	4.86e-21	4.52e-20	36.6044
DERL3	1.42795	2.58284	9.80826	5.06e-21	4.7e-20	36.5646
DNAAF6	-1.32095	0.785017	-9.80814	5.07e-21	4.7e-20	36.5637
MYO1F	-1.11914	3.76593	-9.80345	5.27e-21	4.88e-20	36.5246
BTG2	-1.49986	7.28297	-9.80032	5.41e-21	5.01e-20	36.4985
EFCAB1	-1.67922	1.25232	-9.79629	5.6e-21	5.18e-20	36.4649
FAP	1.45619	2.8079	9.79468	5.68e-21	5.25e-20	36.4515
FBXO41	1.17509	2.53205	9.79223	5.79e-21	5.35e-20	36.4312
CDCA4	1.1228	4.12922	9.78682	6.06e-21	5.59e-20	36.3861
DEPP1	-1.44077	6.77679	-9.78654	6.08e-21	5.6e-20	36.3838
WFDC3	2.14262	2.85439	9.78145	6.34e-21	5.84e-20	36.3415
DKK3	-1.34241	4.30189	-9.78115	6.36e-21	5.86e-20	36.339
RCSD1	-1.11751	3.27588	-9.78078	6.38e-21	5.87e-20	36.3359
STOML3	-1.78311	1.27687	-9.77495	6.7e-21	6.16e-20	36.2874
MAL	-1.71542	3.3855	-9.77465	6.72e-21	6.17e-20	36.2849
TLCD2	-1.06909	3.15128	-9.76425	7.33e-21	6.72e-20	36.1985
DDR2	-1.28062	3.18334	-9.75742	7.76e-21	7.11e-20	36.1418
EPB41L3	-1.2919	2.95364	-9.75385	8e-21	7.32e-20	36.1122
KLHL17	1.10828	3.10999	9.7502	8.25e-21	7.54e-20	36.0819
CCDC34	1.12179	3.5187	9.75013	8.25e-21	7.54e-20	36.0813
CD44	-1.30407	6.57746	-9.7493	8.31e-21	7.59e-20	36.0744
RPL39L	1.7712	4.88123	9.74835	8.38e-21	7.65e-20	36.0665
SLC26A6	1.04608	3.27759	9.74804	8.4e-21	7.66e-20	36.0639
GPRC5A	-1.68567	7.75906	-9.7466	8.5e-21	7.75e-20	36.052
SYNE1	-1.28849	2.85859	-9.7312	9.67e-21	8.81e-20	35.9243
DAPK1	-1.32469	4.96359	-9.72989	9.78e-21	8.91e-20	35.9135
CD59	-1.02684	6.38424	-9.72041	1.06e-20	9.63e-20	35.835
ID2	-1.14218	5.89048	-9.71781	1.08e-20	9.84e-20	35.8134
SIGLEC14	-1.38363	2.74934	-9.7092	1.16e-20	1.06e-19	35.7422
NRGN	-2.12687	5.46174	-9.70206	1.23e-20	1.12e-19	35.6832
TSC22D1	-1.00362	6.36362	-9.70198	1.24e-20	1.12e-19	35.6825
DCDC2	-1.57755	1.91305	-9.70114	1.24e-20	1.13e-19	35.6756
SELENOI	1.00607	4.25377	9.69861	1.27e-20	1.15e-19	35.6546
CCT5	1.03449	6.58212	9.69846	1.27e-20	1.15e-19	35.6534
LCP1	-1.37613	6.79139	-9.68878	1.38e-20	1.25e-19	35.5734
DPT	-1.68237	3.46195	-9.68425	1.43e-20	1.29e-19	35.536
ACY3	1.66266	2.60044	9.68234	1.46e-20	1.31e-19	35.5203
MATK	-1.05941	2.16296	-9.68155	1.46e-20	1.32e-19	35.5137
TUBA4B	-1.89668	1.51592	-9.67964	1.49e-20	1.34e-19	35.4979
S100A4	-1.69731	8.81707	-9.67901	1.5e-20	1.35e-19	35.4928
BARX2	1.98302	2.4526	9.67764	1.51e-20	1.36e-19	35.4815
EPB41L5	-1.05535	4.19675	-9.66831	1.64e-20	1.47e-19	35.4044
DRAM1	-1.49567	6.48195	-9.66718	1.65e-20	1.48e-19	35.3951
PTGIS	-1.60219	3.75227	-9.65839	1.78e-20	1.59e-19	35.3227
STRA6	1.85357	2.00264	9.65665	1.8e-20	1.62e-19	35.3083
C15orf48	2.15676	4.33023	9.64946	1.91e-20	1.71e-19	35.2491
SMPDL3B	1.46604	5.11743	9.64899	1.92e-20	1.72e-19	35.2452
CFAP52	-1.6154	1.41578	-9.64379	2.01e-20	1.79e-19	35.2024
GCNT4	-1.10119	1.48524	-9.64001	2.07e-20	1.85e-19	35.1713
DYNLRB2	-1.60048	1.50055	-9.61866	2.47e-20	2.2e-19	34.9957
NQO1	2.19958	6.98593	9.61733	2.5e-20	2.22e-19	34.9847
FUT8	1.1205	4.62516	9.60971	2.66e-20	2.36e-19	34.9222
FAM43A	-1.17196	3.26014	-9.60736	2.72e-20	2.4e-19	34.9028
TTC29	-1.33301	0.844492	-9.60507	2.77e-20	2.45e-19	34.8841
CWH43	-1.14622	0.588945	-9.60418	2.79e-20	2.47e-19	34.8768
MAP1LC3C	-1.71032	2.37867	-9.59527	3e-20	2.65e-19	34.8036
ARHGAP23	-1.16112	4.02588	-9.59493	3.01e-20	2.65e-19	34.8008
AP1S2	-1.03929	3.77646	-9.59142	3.1e-20	2.73e-19	34.772
EGR1	-1.84612	7.52892	-9.59096	3.11e-20	2.74e-19	34.7683
FBXL7	-1.0763	2.71428	-9.58777	3.2e-20	2.81e-19	34.7421
CD37	-1.28763	4.53365	-9.58595	3.24e-20	2.85e-19	34.7272
NRROS	-1.09109	3.30435	-9.58453	3.28e-20	2.88e-19	34.7156
GJA1	-1.67753	6.39565	-9.58059	3.39e-20	2.97e-19	34.6833
EGR3	-1.43123	2.44235	-9.57458	3.56e-20	3.12e-19	34.634
SLCO4C1	-1.87698	3.10527	-9.57211	3.64e-20	3.18e-19	34.6138
ALDH1A1	-2.07115	6.29021	-9.56864	3.74e-20	3.27e-19	34.5854
SRGN	-1.40235	8.40541	-9.5605	4.01e-20	3.49e-19	34.5187
MORN5	-2.04778	1.67658	-9.55874	4.06e-20	3.54e-19	34.5044
SNTN	-1.83629	1.66901	-9.55212	4.29e-20	3.74e-19	34.4502
NUP155	1.02901	4.1334	9.54921	4.4e-20	3.82e-19	34.4264
CCNO	1.82012	3.51399	9.54733	4.47e-20	3.88e-19	34.411
CTSG	-1.5477	1.71973	-9.54665	4.49e-20	3.9e-19	34.4055
SELENBP1	-1.87719	7.11088	-9.54293	4.63e-20	4.02e-19	34.3751
DOCK8	-1.18696	3.56517	-9.53749	4.84e-20	4.2e-19	34.3306
SRD5A1	1.1151	3.42925	9.53617	4.9e-20	4.24e-19	34.3198
SLC16A6	-1.0772	1.92599	-9.52846	5.22e-20	4.52e-19	34.2569
GSAP	-1.03118	3.71388	-9.52523	5.36e-20	4.64e-19	34.2305
RUNX2	1.09768	2.80515	9.5249	5.38e-20	4.65e-19	34.2278
APOL4	-1.28372	3.48098	-9.52029	5.58e-20	4.82e-19	34.1902
DTHD1	-1.36079	1.19581	-9.51785	5.7e-20	4.92e-19	34.1703
C1orf189	-1.6404	1.44674	-9.51045	6.06e-20	5.22e-19	34.11
PRF1	-1.50374	4.16765	-9.50746	6.21e-20	5.35e-19	34.0856
COL5A1	1.6987	5.92466	9.50392	6.39e-20	5.5e-19	34.0568
AKAP13	-1.12096	4.69674	-9.5027	6.45e-20	5.55e-19	34.0468
COL4A3	-1.74934	2.68662	-9.50238	6.47e-20	5.56e-19	34.0442
GAS7	-1.2192	3.46697	-9.50067	6.56e-20	5.64e-19	34.0302
APLN	-1.65636	3.45809	-9.49591	6.83e-20	5.86e-19	33.9915
SOX12	1.13383	4.39542	9.49395	6.94e-20	5.95e-19	33.9755
AKT3	-1.15425	2.65211	-9.49342	6.97e-20	5.97e-19	33.9712
CYBB	-1.67788	6.11286	-9.48714	7.34e-20	6.28e-19	33.9201
DNAH9	-1.35152	0.780239	-9.4861	7.4e-20	6.33e-19	33.9116
SIGLEC7	-1.09604	2.16968	-9.48146	7.69e-20	6.57e-19	33.8739
CYB5A	-1.38963	5.65448	-9.48024	7.77e-20	6.63e-19	33.864
CTSS	-1.12931	7.63842	-9.47968	7.8e-20	6.66e-19	33.8595
ETS2	-1.12342	6.66889	-9.47394	8.18e-20	6.97e-19	33.8128
CNGA4	-1.26434	0.971264	-9.47152	8.34e-20	7.11e-19	33.7931
MCM2	1.42654	3.8517	9.4715	8.34e-20	7.11e-19	33.7929
NGEF	1.69506	2.33828	9.46987	8.46e-20	7.2e-19	33.7797
ZYG11A	1.30891	1.24344	9.46462	8.83e-20	7.51e-19	33.737
LRRC25	-1.20995	3.73568	-9.46312	8.94e-20	7.6e-19	33.7248
CCNP	1.77149	1.99729	9.45294	9.72e-20	8.25e-19	33.6421
LIPA	-1.20344	6.58144	-9.44767	1.01e-19	8.61e-19	33.5994
PAQR4	1.07131	3.09654	9.43962	1.08e-19	9.19e-19	33.5341
PRR36	1.56931	3.39058	9.4371	1.11e-19	9.38e-19	33.5136
CASP1	-1.13445	4.44414	-9.42788	1.19e-19	1.01e-18	33.4389
EYA4	-1.10825	0.854604	-9.42757	1.2e-19	1.01e-18	33.4364
TBX15	1.80953	2.26461	9.41934	1.28e-19	1.08e-18	33.3698
SGCE	-1.0924	2.33073	-9.41307	1.35e-19	1.14e-18	33.319
APOC1	-1.65656	6.3215	-9.40449	1.45e-19	1.22e-18	33.2496
CFTR	-1.79357	2.30756	-9.4032	1.46e-19	1.23e-18	33.2392
CDKN1C	-1.22753	4.30875	-9.40301	1.46e-19	1.23e-18	33.2376
TMCC3	-1.07837	2.91992	-9.40194	1.48e-19	1.24e-18	33.229
H1-0	1.01424	8.57595	9.39163	1.61e-19	1.35e-18	33.1456
PPP1R16B	-1.27782	3.11389	-9.38572	1.69e-19	1.41e-18	33.0979
BCL2A1	-1.4231	4.84769	-9.38493	1.7e-19	1.42e-18	33.0915
SCEL	-2.07234	4.86952	-9.37707	1.81e-19	1.52e-18	33.0281
LAIR1	-1.23081	3.94331	-9.37271	1.87e-19	1.57e-18	32.9929
PTPRD	-1.02292	1.53634	-9.36694	1.96e-19	1.64e-18	32.9464
MMP28	-2.39747	4.04498	-9.36428	2.01e-19	1.67e-18	32.9249
FOXO1	-1.02425	3.69921	-9.36359	2.02e-19	1.68e-18	32.9194
SIGLEC1	-1.48298	3.61272	-9.35152	2.23e-19	1.85e-18	32.8221
GOLGA7B	1.66428	2.99005	9.35143	2.23e-19	1.85e-18	32.8214
HASPIN	1.00841	1.68956	9.34544	2.34e-19	1.94e-18	32.7732
DNAI2	-1.5581	1.08911	-9.3445	2.36e-19	1.95e-18	32.7656
SAMD5	-1.32702	1.98383	-9.33488	2.55e-19	2.11e-18	32.6882
TTLL10	-1.11868	0.88043	-9.33238	2.6e-19	2.15e-18	32.6681
C20orf85	-3.15261	3.08599	-9.32962	2.66e-19	2.2e-18	32.6459
CABYR	1.87882	2.11529	9.32399	2.79e-19	2.3e-18	32.6006
PCSK5	-1.00163	1.952	-9.3235	2.8e-19	2.31e-18	32.5967
NEDD4L	-1.07287	3.46654	-9.31982	2.88e-19	2.38e-18	32.5671
BIK	1.46385	4.15931	9.31922	2.9e-19	2.39e-18	32.5623
APOA1	-1.07863	0.664546	-9.31102	3.1e-19	2.55e-18	32.4965
AXL	-1.24811	5.05747	-9.30953	3.13e-19	2.58e-18	32.4845
NET1	1.12886	6.58493	9.308	3.17e-19	2.61e-18	32.4722
HACD1	-1.30491	2.35665	-9.30689	3.2e-19	2.63e-18	32.4633
C6orf118	-1.53011	1.05798	-9.30578	3.23e-19	2.66e-18	32.4544
PLAC8	-1.80551	3.49895	-9.30547	3.24e-19	2.66e-18	32.4519
ATP13A4	-2.2988	3.88691	-9.30053	3.37e-19	2.77e-18	32.4122
OVOL1	1.17071	1.73249	9.2959	3.5e-19	2.87e-18	32.3751
RERG	-1.29423	2.97996	-9.29525	3.52e-19	2.88e-18	32.3699
EFNB1	-1.27645	4.78911	-9.29432	3.55e-19	2.91e-18	32.3624
MESP1	1.3532	2.29523	9.29317	3.58e-19	2.93e-18	32.3532
RGS5	-1.25489	5.37402	-9.27744	4.07e-19	3.31e-18	32.2272
SLC29A4	1.84392	3.12924	9.27116	4.28e-19	3.48e-18	32.1769
B4GALNT4	2.08571	2.28409	9.26895	4.36e-19	3.54e-18	32.1592
DSCC1	1.20277	3.04513	9.25876	4.73e-19	3.84e-18	32.0777
LBH	-1.14301	6.60604	-9.23659	5.66e-19	4.58e-18	31.9006
LGSN	2.22016	2.51698	9.23651	5.66e-19	4.58e-18	31.8999
RNF180	-1.07184	2.05561	-9.23432	5.76e-19	4.65e-18	31.8825
LRRC20	1.01315	4.62088	9.2333	5.81e-19	4.69e-18	31.8743
OLFML2A	-1.28884	3.56676	-9.22619	6.15e-19	4.95e-18	31.8176
ERICH3	-1.47995	0.946273	-9.22503	6.21e-19	5e-18	31.8084
LSR	1.13688	7.80754	9.21874	6.54e-19	5.25e-18	31.7582
ZDHHC9	1.12235	6.67618	9.20389	7.37e-19	5.92e-18	31.6399
DUSP8	-1.09519	3.3639	-9.20157	7.51e-19	6.02e-18	31.6214
CCDC68	-1.26886	2.97671	-9.19829	7.71e-19	6.18e-18	31.5954
RSPH4A	-1.76549	1.93857	-9.19771	7.74e-19	6.2e-18	31.5908
PER1	-1.40216	5.39275	-9.18981	8.25e-19	6.59e-18	31.5279
CD53	-1.24552	6.56371	-9.18702	8.44e-19	6.74e-18	31.5057
CARD14	1.2651	1.49922	9.17054	9.63e-19	7.68e-18	31.3748
CDH3	2.14258	4.99885	9.17047	9.64e-19	7.68e-18	31.3742
CERCAM	1.20433	4.65754	9.16721	9.89e-19	7.88e-18	31.3483
THY1	1.34517	4.49636	9.16334	1.02e-18	8.12e-18	31.3176
EFNB2	-1.24705	3.96103	-9.16154	1.04e-18	8.23e-18	31.3033
CA9	2.8276	3.10725	9.15696	1.07e-18	8.53e-18	31.267
TMEM243	-1.02826	4.627	-9.14121	1.22e-18	9.66e-18	31.1421
SYT12	2.09065	2.07288	9.13696	1.26e-18	9.98e-18	31.1085
ROPN1L	-1.73579	1.81498	-9.13616	1.27e-18	1e-17	31.1021
SPINK1	3.92176	5.28431	9.13612	1.27e-18	1e-17	31.1019
P2RY12	-1.09006	1.53107	-9.12839	1.35e-18	1.07e-17	31.0406
PTX3	-1.34532	1.94937	-9.12423	1.4e-18	1.1e-17	31.0078
ERICH2	-1.47282	3.60798	-9.11234	1.54e-18	1.21e-17	30.9137
PDCD1LG2	-1.27058	2.96042	-9.10859	1.58e-18	1.25e-17	30.8841
PXMP4	-1.31841	4.38741	-9.10845	1.58e-18	1.25e-17	30.883
ACSL4	-1.1748	5.53911	-9.10732	1.6e-18	1.26e-17	30.874
CAMK2N1	-1.66029	5.13293	-9.10663	1.61e-18	1.26e-17	30.8686
GSDMB	1.32619	3.60083	9.10423	1.64e-18	1.29e-17	30.8497
SMIM22	1.49042	4.06132	9.10265	1.66e-18	1.3e-17	30.8372
PPIL6	-1.23864	2.07896	-9.0865	1.89e-18	1.48e-17	30.7097
VSIG10	-1.02232	3.3618	-9.07985	1.99e-18	1.56e-17	30.6573
ABCC9	-1.12875	2.23032	-9.07804	2.02e-18	1.58e-17	30.643
EPHB6	-1.32173	2.05574	-9.07103	2.14e-18	1.67e-17	30.5878
C1orf194	-2.01939	2.07797	-9.06965	2.16e-18	1.68e-17	30.5769
C16orf54	-1.24733	3.10936	-9.05892	2.35e-18	1.83e-17	30.4924
IER5L	1.23809	3.29392	9.05682	2.39e-18	1.86e-17	30.4759
SLC22A18	1.0991	4.08523	9.04906	2.55e-18	1.97e-17	30.4149
SGMS2	-1.24559	4.73068	-9.04796	2.57e-18	1.99e-17	30.4062
BEX4	-1.23765	5.93243	-9.04153	2.7e-18	2.09e-17	30.3557
NKD2	-1.35437	3.50123	-9.04047	2.73e-18	2.11e-17	30.3474
CITED2	-1.28671	7.08168	-9.03742	2.79e-18	2.16e-17	30.3234
LAT2	-1.03831	3.81806	-9.03474	2.85e-18	2.2e-17	30.3023
DTX2	1.04002	4.49925	9.03067	2.95e-18	2.27e-17	30.2704
PLBD1	-1.44741	5.37232	-9.03012	2.96e-18	2.28e-17	30.266
EPHB2	1.42938	2.89379	9.02686	3.04e-18	2.34e-17	30.2404
TMTC1	-1.27752	1.83515	-9.02249	3.14e-18	2.42e-17	30.2062
EPHX4	1.41504	2.14282	9.01931	3.22e-18	2.48e-17	30.1813
BAIAP2L2	1.71989	2.38374	9.01858	3.24e-18	2.49e-17	30.1755
FERMT3	-1.16989	5.21076	-9.0165	3.3e-18	2.53e-17	30.1592
MMP13	2.71945	2.8788	9.01559	3.32e-18	2.54e-17	30.1521
ZMYND10	-1.88252	2.48368	-9.01143	3.43e-18	2.63e-17	30.1195
P2RX7	-1.0124	1.94584	-9.01041	3.46e-18	2.65e-17	30.1114
LAPTM4B	1.18019	8.03674	9.00743	3.54e-18	2.71e-17	30.0881
CCDC170	-1.46033	2.14736	-9.00531	3.6e-18	2.75e-17	30.0715
UBE2S	1.26864	4.1048	9.00224	3.69e-18	2.82e-17	30.0475
CIP2A	1.19814	2.55495	8.99993	3.76e-18	2.87e-17	30.0293
[truncated: 756 more rows]

## Sheet: Table S5
Table S5 Genes and their coefficients in LASSO regression model.
[truncated: 7 more rows]

[truncated: 5 more sheets: Table S6, Table S7, Table S8, Table S9, Table S10]
